# Supplementary material for: Bioinspired synthesis of pentacyclic onocerane triterpenoids
Source: Chem Sci. 2017 Oct 16;8(12):8285–90. doi: 10.1039/c7sc03903d (PMC5858022; doi:10.1039/c7sc03903d)
Supplement: Supplementary file 1 [file SC-008-C7SC03903D-s001.pdf]

## **Supporting Information**

### **Bioinspired Synthesis of Pentacyclic Onocerane Triterpenoids**

Florian Bartels, Young J. Hong, Daijiro Ueda, Manuela Weber, Tsutomu Sato,\* Dean J. Tantillo,\* and Mathias Christmann\*

## **List of contents**

|                                                                                       |     |
|---------------------------------------------------------------------------------------|-----|
| 1. General Methods .....                                                              | 3   |
| 2. Synthesis of Compounds.....                                                        | 4   |
| 3. Screening of Reaction Conditions .....                                             | 57  |
| 4. NMR Spectra.....                                                                   | 63  |
| 5. Literature Comparison: Polyene Cyclizations terminated by Aliphatic Alcohols ..... | 108 |
| 6. Enzymatic Studies .....                                                            | 110 |
| 7. Density Functional Calculations .....                                              | 114 |
| 8. Crystallographic Data .....                                                        | 241 |
| 9. References .....                                                                   | 242 |

## 1. General Methods

All reactions sensitive to moisture and/or air were carried out using heat-gun dried (630 °C) glassware under an argon atmosphere. Dry solvents ( $\text{CH}_2\text{Cl}_2$ ,  $\text{Et}_2\text{O}$ , THF) were purified by Solvent Purification System M-BRAUN Glovebox Technology SPS-800. Dry DMF was obtained from Acros Organics 99.8%, extra dry over molecular sieves. Dry pyridine was obtained from Sigma Aldrich, anhydrous, 99.8%. Dry  $\text{MeNO}_2$  was obtained by distillation over  $\text{CaH}_2$ . Dry 1,2-dimethoxyethane was obtained by distillation over  $\text{CaH}_2$ . Dry TMEDA was obtained by distillation over  $\text{CaH}_2$ . Dry methanol (HiPerSolv CHROMANORM HPLC GRADE) was obtained from VWR Chemicals. Solvents for column chromatography were used after short path distillation using a rotary evaporator. Commercial reagents were used as received unless otherwise stated. All reactions were carried out under magnetic stirring with Teflon coated stirring bars and were monitored by TLC analysis on 0.20 mm silica gel plates (Macherey-Nagel G/UV254). Staining of TLC plates was performed with an acidic vanillin solution (1 g vanillin, 20 mL conc. acetic acid, 10 mL conc. sulfuric acid, 170 mL methanol) and heat. Column chromatography was carried out on silica gel 60 M (0.04–0.063 mm) from Macherey-Nagel and aluminium oxide (basic, Brockmann I, for chromatography, 50–200  $\mu\text{m}$ , 60A) from ACROS Organics. Concentration under reduced pressure was performed by rotary evaporation at 40 °C.  $^1\text{H}$  NMR and  $^{13}\text{C}$  NMR spectra were recorded on Bruker (ECP 400, AC 500, AV 700) or JEOL (ECX 400, Eclipse 500) instruments. Chemical shifts are reported relative to  $\text{CDCl}_3$  ( $^1\text{H}$ : 7.26 ppm;  $^{13}\text{C}$ : 77.16 ppm) and  $\text{C}_6\text{D}_6$  ( $^1\text{H}$ : 7.16 ppm;  $^{13}\text{C}$ : 128.06 ppm). Chemical shifts are reported in parts per million as follows: chemical shift, multiplicity (s = singlet, d = doublet, t = triplet, q = quartet, p = pentet, sext = sextet, m = multiplet, *br* = broad, and combinations thereof), coupling constant and integration. Integrals are in accordance with assignments, coupling constants are given in Hz. For detailed peak assignments, 2D spectra were recorded when necessary (COSY, DEPT, HMQC, HMBC, TOCSY, GOESY, NOESY). IR spectra were measured on a JASCO FT/IR–4100 instrument equipped with an ATR unit. High resolution ESI analyses were performed on a Varian Inc. Ionspec QFT-7. High resolution EI spectra were performed on a Waters Autospec Premier. Optical rotation measurements were performed on a P-2000 polarimeter from Jasco in a 10 cm optical-path length cell with the frequency of the NaD line measured at the temperature and concentration (in g/100 mL) indicated. The enantiomeric excess was determined by chiral HPLC using Agilent Technologies 1200 series with a diode array detector. Melting points were measured with a Stuart melting point apparatus SMP30 and on a Reichert Thermovar Kofler hot-stage-microscope and are uncorrected.

## 2. Synthesis of Compounds

### Compound 17

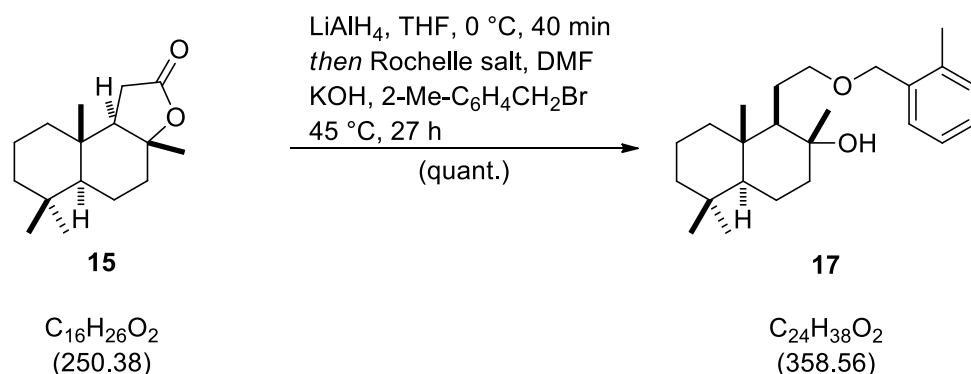

To LiAlH<sub>4</sub> (107 mg, 2.81 mmol, 0.70 eq.) at 0 °C was added a solution of lactone **15** (1.00 g, 4.01 mmol, 1.0 eq.) in THF (6 mL, flask rinsed with 2 x 2 mL) over 5 min. After 40 min of stirring at the same temperature Rochelle salt (1.36 g, 4.81 mmol, 1.2 eq.), DMF (10 mL), freshly ground KOH (900 mg, 16.0 mmol, 4.0 eq.) and 2-Me-C<sub>6</sub>H<sub>4</sub>CH<sub>2</sub>Br (1.10 mL, 1.52 g, 8.22 mmol, 2.1 eq.) were added successively and the reaction mixture was heated to 45 °C for 27 h. Water was added to the reaction and the mixture was diluted with EtOAc. The organic phase was separated and the aqueous phase was extracted with EtOAc. The combined organic extracts were washed repeatedly with brine, dried over MgSO<sub>4</sub>, filtered and concentrated under reduced pressure. The residue was purified by flash column chromatography (SiO<sub>2</sub>, *n*-pentane/EtOAc 1:0 to 10:1) to afford ether **17** (1.43 g, 4.01 mmol, quant.) as a light-yellow oil.

$R_f = 0.52$  (*n*-pentane/EtOAc 5:1).

$[\alpha]_D^{28} = -14.2^\circ$  ( $c = 1.33$ , CHCl<sub>3</sub>).

**<sup>1</sup>H-NMR** (500 MHz, CDCl<sub>3</sub>):  $\delta$  [ppm] = 7.30 – 7.28 (m, 1H), 7.22 – 7.14 (m, 3H), 4.58 – 4.48 (m, 2H), 3.64 (ddd,  $J = 8.7, 5.4, 4.1$  Hz, 1H), 3.38 (ddd,  $J = 10.1, 8.7, 4.5$  Hz, 1H), 3.24 (s, 1H), 2.34 (s, 3H), 1.90 (dt,  $J = 12.5, 3.2$  Hz, 1H), 1.77 (ddt,  $J = 15.3, 10.2, 5.2$  Hz, 1H), 1.68 – 1.53 (m, 4H), 1.46 – 1.34 (m, 3H), 1.30 – 1.20 (m, 2H), 1.18 – 1.10 (m, 4H), 0.93 – 0.82 (m, 5H), 0.79 (s, 6H).

**<sup>13</sup>C-NMR** (126 MHz, CDCl<sub>3</sub>):  $\delta$  [ppm] = 136.7, 135.9, 130.4, 128.7, 128.0, 125.9, 72.4, 72.2, 71.6, 59.4, 56.3, 44.2, 42.1, 39.7, 39.2, 33.6, 33.4, 25.5, 24.5, 21.6, 20.6, 19.0, 18.6, 15.4.

IR (v/cm<sup>-1</sup>, ATR) = 3440, 2926, 2863, 1715, 1460, 1383, 1364, 1288, 1079, 933, 744.

**HRMS (ESI)**:  $m/z$  calculated for C<sub>24</sub>H<sub>38</sub>O<sub>2</sub>Na<sup>+</sup> [M+Na]<sup>+</sup>: 381.2764, found 381.2762.

Note: On 4.5 g scale 96% yield was obtained.

Compound **13** from **17**

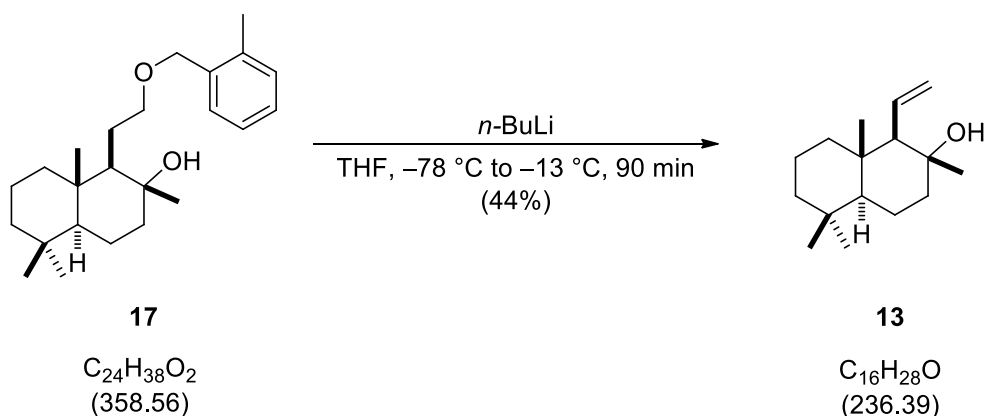

To a solution of ether **17** (177 mg, 458  $\mu\text{mol}$ , 1.0 eq.) in THF (5 mL) at  $-78\text{ }^{\circ}\text{C}$  was added a solution of *n*-BuLi (0.733 mL, 2.5 M in hexane, 1.83 mmol, 4.0 eq.). After 10 min at that temperature the reaction mixture was warmed to  $-13\text{ }^{\circ}\text{C}$  (change of cooling baths) and stirred for 90 min. Water was added and the reaction mixture was diluted with EtOAc. The organic phase was separated and the aqueous phase was extracted with EtOAc. The combined organic extracts were washed with brine, dried over  $\text{MgSO}_4$ , filtered and concentrated under reduced pressure. The residue was purified by flash column chromatography ( $\text{SiO}_2$ , *n*-pentane/EtOAc 1:0 to 20:1 to 15:1 to 10:1) to afford alkene **13** (48.2 mg, 204  $\mu\text{mol}$ , 44%) as a white solid.

Crystals suitable for single crystal X-ray diffraction were obtained after slow evaporation from EtOAc/*n*-hexane.

$R_f = 0.50$  (*n*-pentane/EtOAc, 9:1).

$[\alpha]_{\text{D}}^{28} = -16.4$  ( $c = 2.03$ ,  $\text{CHCl}_3$ ).

**$^1\text{H}$ -NMR** (500 MHz,  $\text{CDCl}_3$ ):  $\delta$  [ppm] = 5.82 (dt,  $J = 16.8, 10.2$  Hz, 1H), 5.26 (dd,  $J = 10.2, 2.5$  Hz, 1H), 5.15 (dd,  $J = 16.9, 2.4$  Hz, 1H), 1.94 ( $s_{br}$ , 1H), 1.90 (dt,  $J = 12.6, 3.3$  Hz, 1H), 1.75 (d,  $J = 10.2$  Hz, 1H), 1.71 – 1.64 (m, 1H), 1.56 (tt,  $J = 14.4, 3.7$  Hz, 1H), 1.51 – 1.36 (m, 4H), 1.38 – 1.23 (m, 1H), 1.19 (s, 3H), 1.14 (td,  $J = 13.5, 12.8, 4.3$  Hz, 1H), 0.93 – 0.89 (m, 4H), 0.89 – 0.85 (m, 4H), 0.81 (s, 3H).

**$^{13}\text{C}$ -NMR** (126 MHz,  $\text{CDCl}_3$ ):  $\delta$  [ppm] = 135.1, 120.6, 71.5, 67.7, 55.9, 42.2, 42.1, 40.9, 37.2, 33.6, 33.5, 25.2, 21.8, 20.2, 18.6, 15.9.

**IR** ( $\nu/\text{cm}^{-1}$ , ATR) = 3462, 2993, 2923, 2869, 1462, 1386, 1188, 1128, 935, 911.

**HRMS (ESI)**:  $m/z$  calculated for  $\text{C}_{16}\text{H}_{28}\text{OK}^+$   $[\text{M}+\text{K}]^+$ : 275.1772, found 275.1784.

**Mp** = 89 – 90  $^{\circ}\text{C}$ .

Note: For an attempted synthesis of **13**, see:<sup>1</sup>.

Compound **13** from **17** (gram-scale reaction)

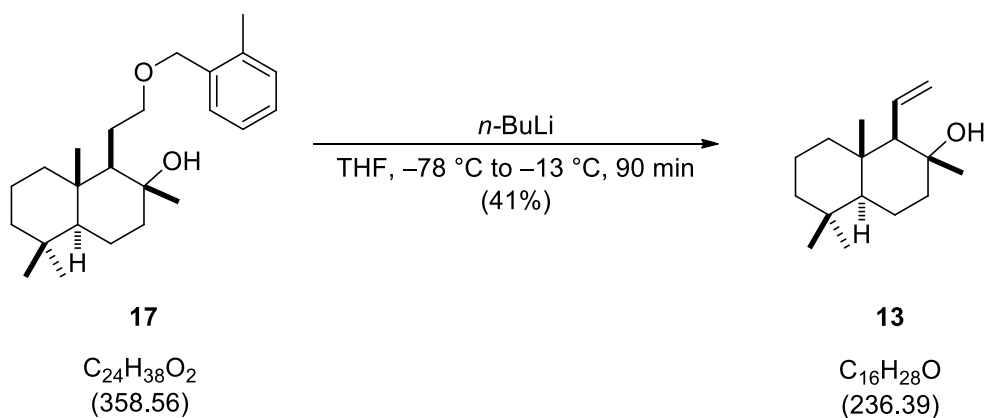

To a solution of ether **17** (4.72 g, 13.2 mmol, 1.0 eq.) in THF (132 mL) at  $-78\text{ }^\circ\text{C}$  was added a solution of *n*-BuLi (21.1 mL, 2.5 M in hexane, 52.7 mmol, 4.0 eq.). After 10 min at that temperature the reaction mixture was warmed to  $-13\text{ }^\circ\text{C}$  (change of cooling baths) and stirred for 90 min. Water was added and the reaction mixture was diluted with EtOAc. The organic phase was separated and the aqueous phase was extracted with EtOAc. The combined organic extracts were washed with brine, dried over  $\text{MgSO}_4$ , filtered and concentrated under reduced pressure. The residue was purified by flash column chromatography ( $\text{SiO}_2$ , *n*-pentane/EtOAc 1:0 to 20:1 to 15:1 to 10:1) to afford alkene **13** (1.27 g, 5.45 mmol, 41%) as a white solid.

## Compound **19**

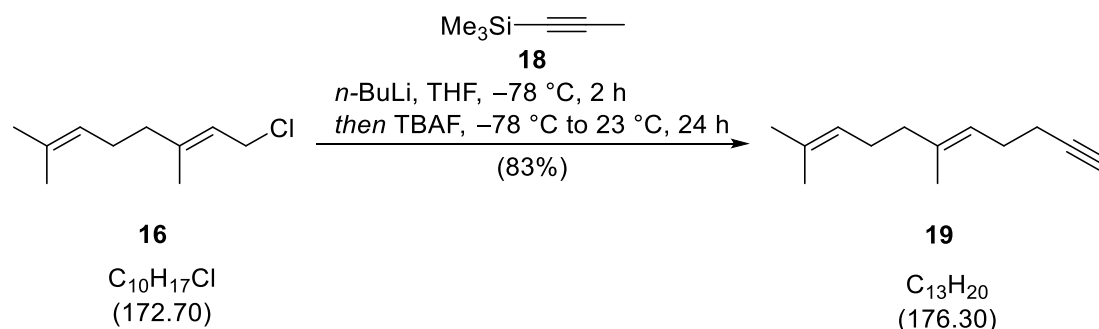

To a solution of 1-(trimethylsilyl)propyne (**18**) (9.52 mL, 7.22 g, 64.3 mmol, 1.2 eq.) in THF (120 mL) at  $-78\text{ }^\circ\text{C}$  was added  $n\text{-BuLi}$  (25.1 mL, 2.5 M in hexane, 62.7 mmol, 1.2 eq.). The yellow solution was stirred for 2 h at that temperature. Geranyl chloride (**16**) (9.03 g, 52.3 mmol, 1.0 eq.) in THF (8 mL, flask rinsed with 2 x 1 mL) was added. The reaction mixture was stirred for 2 h at  $-78\text{ }^\circ\text{C}$ . Tetrabutylammonium fluoride (68.0 mL, 1 M in THF, 68.0 mmol, 1.3 eq.) was added to the flask and the reaction mixture was allowed to reach  $23\text{ }^\circ\text{C}$  over 24 h. Water was added and the reaction mixture was diluted with EtOAc. The organic phase was separated and the aqueous phase was extracted with EtOAc. The combined organic extracts were washed with brine, dried over  $\text{MgSO}_4$ , filtered and concentrated under reduced pressure. The residue was purified by flash column chromatography ( $\text{SiO}_2$ ,  $n\text{-pentane}/\text{CH}_2\text{Cl}_2$ , 0:1 to 1:1) to afford alkyne **19** (7.64 g, 43.4 mmol, 83%) as a slightly yellow oil.

$R_f = 0.80$  ( $n\text{-pentane}$ ).

**$^1\text{H-NMR}$**  (700 MHz,  $\text{CDCl}_3$ ):  $\delta$  [ppm] = 5.19 – 5.16 (m, 1H), 5.12 – 5.07 (m, 1H), 2.26 – 2.18 (m, 4H), 2.10 – 2.05 (m, 2H), 2.03 – 1.98 (m, 2H), 1.94 (t,  $J = 2.5\text{ Hz}$ , 1H), 1.68 (s, 3H), 1.62 (s, 3H), 1.60 (s, 3H).

**$^{13}\text{C-NMR}$**  (176 MHz,  $\text{CDCl}_3$ ):  $\delta$  [ppm] = 136.9, 131.6, 124.4, 122.6, 84.7, 68.2, 39.8, 27.3, 26.8, 25.8, 19.1, 17.8, 16.3.

**IR** ( $\text{v}/\text{cm}^{-1}$ , ATR) = 3309, 2966, 2921, 2856, 2118, 1445, 1377, 1325, 1242, 1108.

**HRMS (EI)**:  $m/z$  calculated for  $\text{C}_{13}\text{H}_{19}^+$   $[\text{M-H}]^+$  175.1481, found 175.1488.

The spectral data matched previously obtained data.<sup>2,3</sup>

## Compound 20

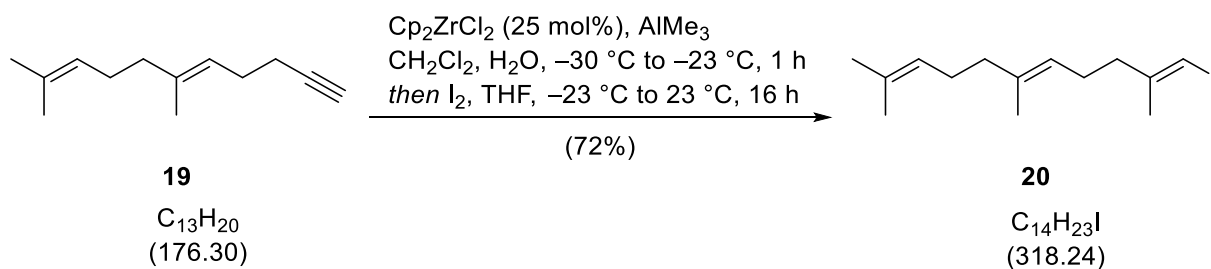

To a suspension of  $\text{Cp}_2\text{ZrCl}_2$  (3.79 g, 13.0 mmol, 25 mol%) in  $\text{CH}_2\text{Cl}_2$  (200 mL) at  $-30\text{ }^\circ\text{C}$  was added  $\text{AlMe}_3$  (77.8 mL, 2.0 M in toluene, 156 mmol, 3.0 eq.).  $\text{H}_2\text{O}$  (935  $\mu\text{L}$ , 51.9 mmol, 1.0 eq.) was added slowly. The reaction mixture was warmed to  $-23\text{ }^\circ\text{C}$  over 1 h. Alkyne **19** (9.14 g 51.9 mmol, 1.0 eq.) in  $\text{CH}_2\text{Cl}_2$  (75 mL) was added dropwise to the reaction mixture at that temperature. After 1 h a solution of iodine (15.8 g, 62.2 mmol, 1.2 eq.) in THF (75 mL) was added dropwise at the same temperature. The reaction was allowed to reach  $23\text{ }^\circ\text{C}$  over 15 h. A saturated aqueous solution of  $\text{K}_2\text{CO}_3$  (15 mL) was added dropwise. The reaction mixture was diluted with  $\text{CH}_2\text{Cl}_2$ . The organic phase was separated and the aqueous phase was extracted with  $\text{CH}_2\text{Cl}_2$ . The combined organic extracts were washed with brine, dried over  $\text{MgSO}_4$ , filtered and concentrated under reduced pressure. The residue was purified by flash column chromatography ( $\text{SiO}_2$ , *n*-pentane) to afford vinyl iodide **20** (11.9 g, 37.2 mmol, 72%) as a colorless oil.

$R_f = 0.92$  (*n*-pentane).

**$^1\text{H-NMR}$**  (700 MHz,  $\text{CDCl}_3$ ):  $\delta$  [ppm] = 5.87 (sext,  $J = 1.1\text{ Hz}$ , 1H), 5.10 – 5.05 (m, 2H), 2.25 – 2.20 (m, 2H), 2.16 – 2.10 (m, 2H), 2.09 – 2.04 (m, 2H), 2.00 – 1.96 (m, 2H), 1.84 (d,  $J = 1.1\text{ Hz}$ , 3H), 1.69 (d,  $J = 1.4\text{ Hz}$ , 3H), 1.61 (s, 3H), 1.59 (s, 3H).

**$^{13}\text{C-NMR}$**  (176 MHz,  $\text{CDCl}_3$ ):  $\delta$  [ppm] = 148.0, 136.2, 131.6, 124.4, 123.1, 74.9, 39.8, 39.7, 26.9, 26.4, 25.9, 24.1, 17.9, 16.2.

**IR** ( $\text{v}/\text{cm}^{-1}$ , ATR) = 2963, 2918, 2850, 1442, 1377, 1267, 1141, 833, 766, 664.

**HRMS (EI)**:  $m/z$  calculated  $\text{C}_{14}\text{H}_{23}^+ [\text{M-I}]^+$  191.1794, found 191.1799.

The spectral data matched previously obtained data.<sup>3</sup>

Note: The use of fresh  $\text{Cp}_2\text{ZrCl}_2$  and  $\text{AlMe}_3$  is necessary for reproducible yield.

## Compound **S2**

### Procedure using Corey-Noe-Lin ligand

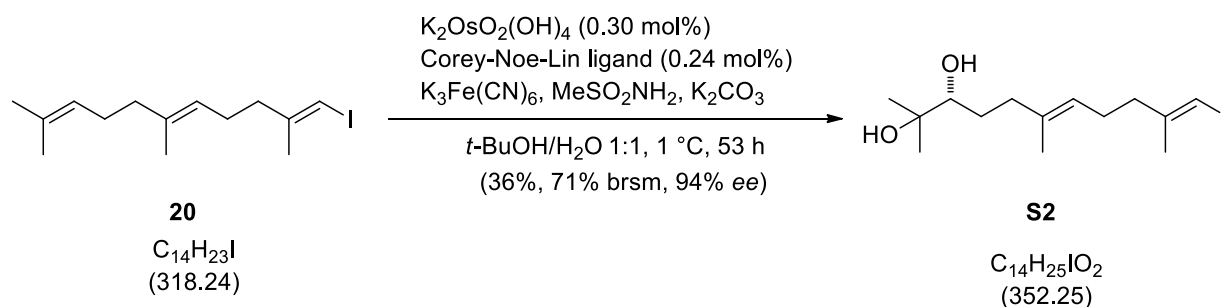

Corey-Noe-Lin ligand

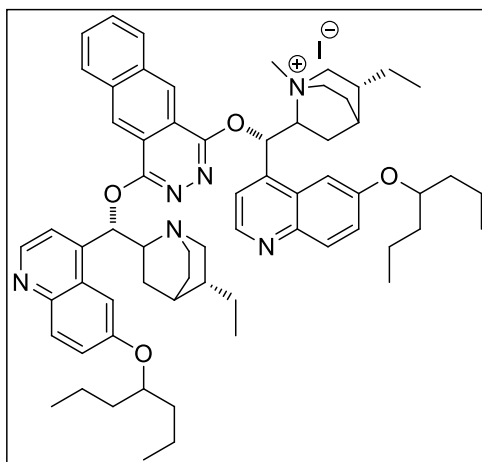

$\text{K}_2\text{OsO}_2(\text{OH})_4$  (3.5 mg, 9.5  $\mu\text{mol}$ , 0.30 mol%),  $\text{K}_3\text{Fe}(\text{CN})_6$  (3.10 g, 9.43 mmol, 3.0 eq.),  $\text{MeSO}_2\text{NH}_2$  (299 mg, 3.14 mmol, 1.0 eq.),  $\text{K}_2\text{CO}_3$  (1.30 g, 9.43 g, 3.0 eq.) and Corey-Noe-Lin ligand (8.6 mg, 7.5  $\mu\text{mol}$ , 0.24 mol%) were dissolved under stirring in  $t\text{-BuOH}/\text{H}_2\text{O}$  (32 mL, 1:1) at 23 °C. After solvation the reaction mixture was cooled to 1 °C and stirred for 30 min. Vinyl iodide **20** (1.00 g, 3.14 mmol, 1.0 eq.) was added and the reaction mixture was stirred for 53 h at the same temperature.  $\text{Na}_2\text{SO}_3$  (1.98 g, 15.7 g, 5.0 eq.) and a saturated aqueous solution of  $\text{Na}_2\text{SO}_3$  (5 mL) were added at 1 °C. After 30 min the reaction mixture was allowed to warm to 23 °C and was diluted with EtOAc. The organic phase was separated and the aqueous phase was extracted with EtOAc. The combined organic extracts were washed with KOH (2 M) and brine, dried over  $\text{MgSO}_4$ , filtered and concentrated under reduced pressure. The residue was purified by flash column chromatography ( $\text{SiO}_2$ ,  $n\text{-pentane}/\text{EtOAc}$  5:1 to 4:1) to afford diol **S2** (399 mg, 1.13 mmol, 36%, 71% brsm, 94% ee) and recovered vinyl iodide **20** (490 mg, 1.54 mmol) as colorless oils.

$R_f$  = 0.11 ( $n\text{-pentane}/\text{EtOAc}$ , 5:1).

$[\alpha]_D^{29} = +9.4$  ( $c$  = 1.38,  $\text{CHCl}_3$ ).

**<sup>1</sup>H-NMR** (700 MHz, CDCl<sub>3</sub>): δ [ppm] = 5.86 (sext, *J* = 1.1 Hz, 1H), 5.15 – 5.10 (m, 1H), 3.33 (dd, *J* = 10.6, 2.0 Hz, 1H), 2.25 – 2.21 (m, 3H), 2.19 (s, 1H), 2.16 – 2.11 (m, 2H), 2.09 – 2.03 (m, 1H), 2.01 (s, 1H), 1.83 (d, *J* = 1.1 Hz, 3H), 1.61 (q, *J* = 0.9 Hz, 3H), 1.57 (dddd, *J* = 13.8, 9.1, 7.1, 2.0 Hz, 1H), 1.40 (dddd, *J* = 14.0, 10.6, 8.8, 5.4 Hz, 1H), 1.20 (s, 3H), 1.16 (s, 3H).

**<sup>13</sup>C-NMR** (176 MHz, CDCl<sub>3</sub>): δ [ppm] = 147.8, 136.1, 123.9, 78.3, 75.0, 73.2, 39.5, 36.9, 29.9, 26.7, 26.3, 24.0, 23.4, 16.1.

**IR** (ν/cm<sup>-1</sup>, ATR) = 3407, 3057, 2924, 2853, 1448, 1379, 1268, 1142, 1076, 766.

**HRMS (ESI)**: *m/z* calculated for C<sub>14</sub>H<sub>25</sub>IO<sub>2</sub>Na<sup>+</sup> [M+Na]<sup>+</sup> 375.0791, found 375.0805.

# Procedure using (DHQD)<sub>2</sub>PHAL

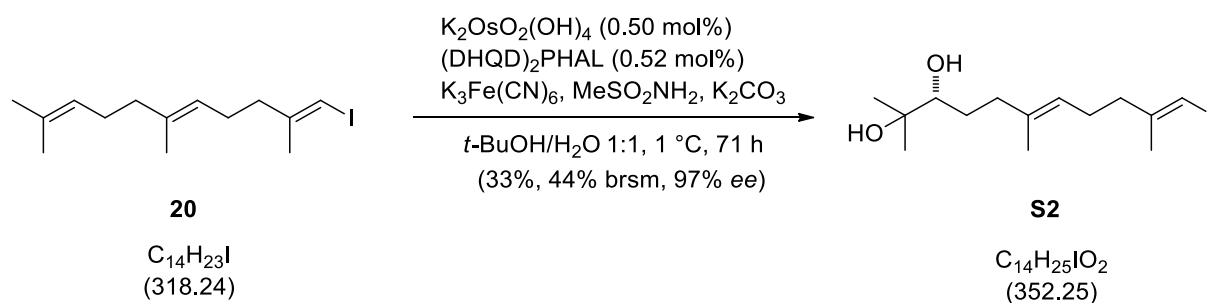

$\text{K}_2\text{OsO}_2(\text{OH})_4$  (20.4 mg, 56.0  $\mu\text{mol}$ , 0.50 mol%),  $\text{K}_3\text{Fe}(\text{CN})_6$  (11.0 g, 33.5 mmol, 3.0 eq.),  $\text{MeSO}_2\text{NH}_2$  (1.05 g, 11.0 mmol, 1.0 eq.),  $\text{K}_2\text{CO}_3$  (4.61 g, 33.4 g, 3.0 eq.) and (DHQD)<sub>2</sub>PHAL (44.9 mg, 58.0  $\mu\text{mol}$ , 0.52 mol%) were dissolved under stirring in *t*-BuOH/H<sub>2</sub>O (116 mL, 1:1) at 23 °C. After solvation the reaction mixture was cooled to 1 °C and stirred for 30 min. Vinyl iodide **20** (3.54 g, 11.1 mmol, 1.0 eq.) was added and the reaction mixture was stirred for 71 h at the same temperature.  $\text{Na}_2\text{SO}_3$  (7.01 g, 55.6 g, 5.0 eq.) and a saturated aqueous solution of  $\text{Na}_2\text{SO}_3$  (5 mL) were added at 1 °C. After 30 min the reaction mixture was allowed to warm to 23 °C and was diluted with EtOAc. The organic phase was separated and the aqueous phase was extracted with EtOAc. The combined organic extracts were washed with KOH (2 M) and brine, dried over  $\text{MgSO}_4$ , filtered and concentrated under reduced pressure. The residue was purified by flash column chromatography ( $\text{SiO}_2$ , *n*-pentane/EtOAc 5:1 to 4:1) to afford diol **S2** (1.28 g, 3.64 mmol, 33%, 44% brsm, 97% *ee*) and recovered vinyl iodide **20** (896 mg, 2.81 mmol) as colorless oils.

## Determination of absolute configuration: Mosher ester analysis of **S2**

### (*S*)-Mosher ester

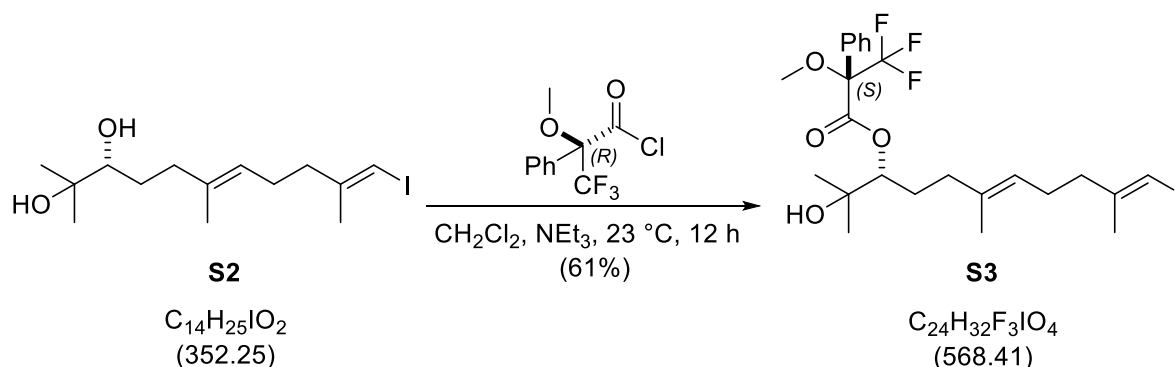

To a solution of diol **S2** (8.0 mg, 23  $\mu$ mol, 1.0 eq.) in  $CH_2Cl_2$  (0.5 mL) at 23  $^{\circ}C$  was added  $NEt_3$  (25.2  $\mu$ L, 182  $\mu$ mol, 8.0 eq.), (*R*)-MTPA-Cl (8.50  $\mu$ L, 45.4  $\mu$ mol, 2.0 eq.) and DMAP (one crystal) successively. The solution was stirred for 12 h. The solution was directly purified by flash column chromatography ( $SiO_2$ , *n*-pentane/EtOAc 1:0 to 9:1) to afford ester **S3** as a white solid (7.9 mg, 14  $\mu$ mol, 61%).

**$^1H$ -NMR** (500 MHz,  $CDCl_3$ ):  $\delta$  [ppm] = 7.64 – 7.58 (m, 2H), 7.43 – 7.38 (m, 3H), 5.92 – 5.83 (m, 1H), 5.05 – 5.01 (m, 1H), 4.98 (dd,  $J$  = 9.9, 2.2 Hz, 1H), 3.58 (s, 3H), 2.24 – 2.20 (m, 2H), 2.16 – 2.09 (m, 2H), 2.00 – 1.92 (m, 2H), 1.83 (s, 3H), 1.82 – 1.75 (m, 1H), 1.65 (dtd,  $J$  = 14.5, 9.6, 5.4 Hz, 1H), 1.55 (s, 3H), 1.51 (*s<sub>br</sub>*, 1H), 1.18 (s, 3H), 1.14 (s, 3H).

**HRMS (ESI)**:  $m/z$  calculated for  $C_{24}H_{32}F_3IO_4Na^+$  [ $M+Na$ ] $^+$  591.1190, found 591.1199.

### (*R*)-Mosher ester

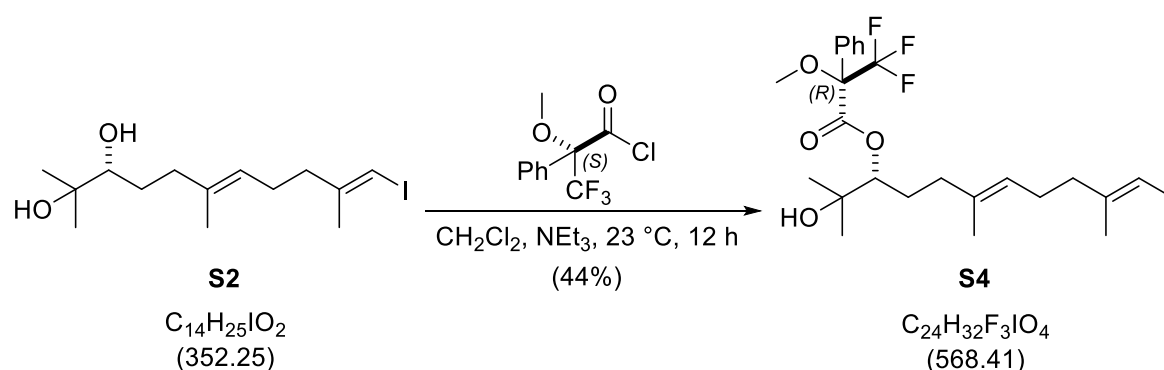

To a solution of diol **S2** (7.3 mg, 21  $\mu$ mol, 1.0 eq.) in  $CH_2Cl_2$  (0.5 mL) at 23  $^{\circ}C$  was added  $NEt_3$  (23.0  $\mu$ L, 166  $\mu$ mol, 8.0 eq.), (*S*)-MTPA-Cl (7.76  $\mu$ L, 41.4  $\mu$ mol, 2.0 eq.) and DMAP (one crystal) successively. The solution was stirred for 12 h. The solution was directly purified by flash column chromatography ( $SiO_2$ , *n*-pentane/EtOAc 1:0 to 9:1) to afford ester **S4** as a white solid (5.2 mg, 9.1  $\mu$ mol, 44%).

**$^1\text{H}$ -NMR** (500 MHz,  $\text{CDCl}_3$ ):  $\delta$  [ppm] = 7.65 – 7.61 (m, 2H), 7.43 – 7.39 (m, 3H), 5.88 – 5.86 (m, 1H), 5.01 – 4.98 (m, 1H), 4.97 (dd,  $J$  = 10.2, 2.1 Hz, 1H), 3.57 (s, 3H), 2.25 – 2.19 (m, 2H), 2.14 – 2.08 (m, 2H), 1.89 – 1.84 (m, 2H), 1.83 (s, 3H), 1.75 – 1.65 (m, 1H), 1.62 – 1.57 (m, 1H), 1.51 (s, 3H), 1.28 (s, 1H), 1.23 (s, 3H), 1.16 (s, 3H).

**HRMS (ESI)**:  $m/z$  calculated for  $\text{C}_{24}\text{H}_{32}\text{F}_3\text{IO}_4\text{Na}^+$   $[\text{M}+\text{Na}]^+$  591.1190, found 591.1186.

The assignments were resolved using NMR spectroscopic methods:  $^1\text{H}$ , COSY, HMQC, HMBC. The comparison of both esters shows (*R*)-configuration at C-3.<sup>4</sup>

$\Delta \delta$  [(*S*)-MTPA – (*R*)-MTPA] =

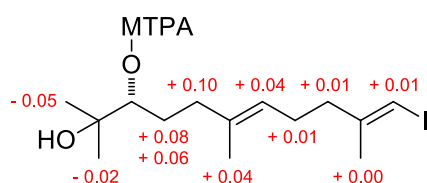

## HPLC-Analysis of S2

HPLC-Analysis was performed using Chiralpak IA, 3% EtOH/hexane, 20 °C, 1 mL/min.

### 1) Racemic mixture

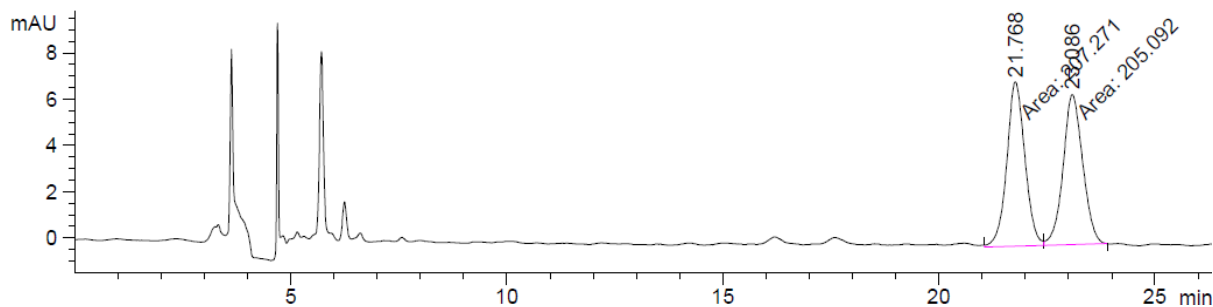

Signal 4: DAD1 E, Sig=270,4 Ref=360,100

| Peak # | RetTime [min] | Type | Width [min] | Area [mAU*s] | Height [mAU] | Area %  |
|--------|---------------|------|-------------|--------------|--------------|---------|
| 1      | 21.768        | MF   | 0.4864      | 207.27090    | 7.10185      | 50.2642 |
| 2      | 23.086        | FM   | 0.5272      | 205.09232    | 6.48366      | 49.7358 |

Totals : 412.36322 13.58551

### 2) S2 synthesized using CNL-ligand

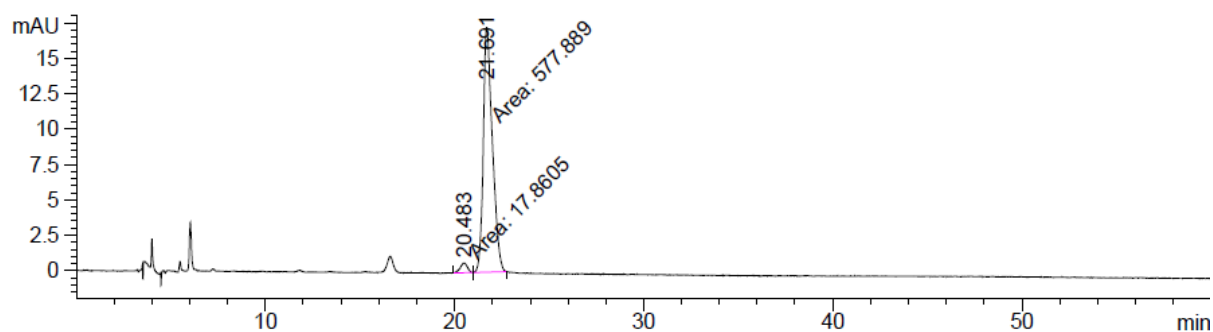

Signal 4: DAD1 E, Sig=270,4 Ref=360,100

| Peak # | RetTime [min] | Type | Width [min] | Area [mAU*s] | Height [mAU] | Area %  |
|--------|---------------|------|-------------|--------------|--------------|---------|
| 1      | 20.483        | MM   | 0.4261      | 17.86053     | 6.98630e-1   | 2.9980  |
| 2      | 21.691        | MM   | 0.5563      | 577.88861    | 17.31263     | 97.0020 |

Totals : 595.74914 18.01126

### 3) S2 synthesized using (DHQD)<sub>2</sub>PHAL-ligand

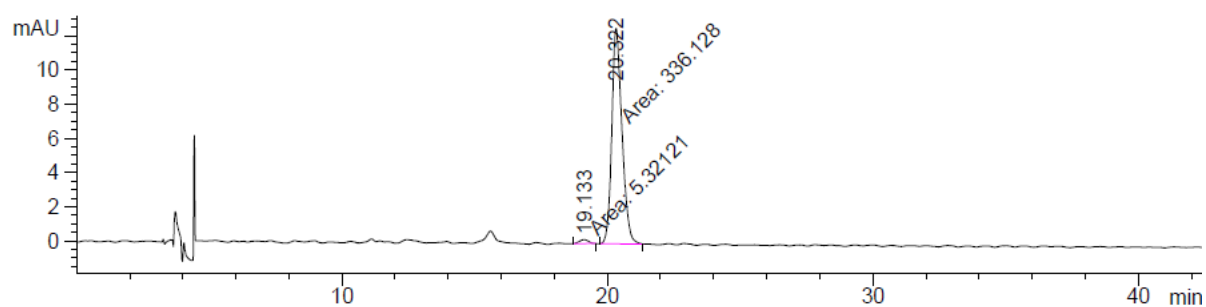

Signal 4: DAD1 E, Sig=270,4 Ref=360,100

| Peak # | RetTime [min] | Type | Width [min] | Area [mAU*s] | Height [mAU] | Area %  |
|--------|---------------|------|-------------|--------------|--------------|---------|
| 1      | 19.133        | MM   | 0.3903      | 5.32121      | 2.27222e-1   | 1.5584  |
| 2      | 20.322        | MM   | 0.4445      | 336.12796    | 12.60288     | 98.4416 |

Totals : 341.44917 12.83010

## Compound **14**

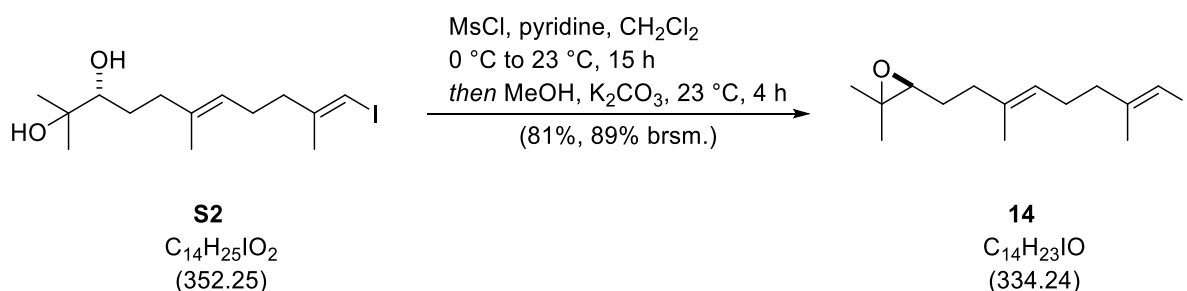

To a solution of diol **S2** (1.52 g, 4.31 mmol, 1.0 eq.) in  $CH_2Cl_2$  (13 mL) at 0 °C was added pyridine (5.20 mL, 65.0 mmol, 15 eq.) and  $MsCl$  (367  $\mu$ L, 543 mg, 4.74 mmol, 1.1 eq.) sequentially. The reaction mixture was allowed to warm to 23 °C over 15 h. Methanol (60 mL) and  $K_2CO_3$  (5.95 g, 43.1 mmol, 10 eq.) were added sequentially at 23 °C and the reaction mixture was stirred for 4 h. The reaction mixture was concentrated under reduced pressure. The residue was diluted with  $CH_2Cl_2$  and water. The organic phase was separated and the aqueous phase was extracted with  $CH_2Cl_2$ . The combined organic extracts were washed with a saturated aqueous solution of  $CuSO_4$  and brine, dried over  $MgSO_4$ , filtered and concentrated under reduced pressure. The residue was purified by flash column chromatography ( $SiO_2$ , *n*-pentane/EtOAc 50:1 to 3:1) to afford epoxide **14** (1.16 g, 3.48 mmol, 81%, 89% brsm.) as a slightly yellow oil and recovered diol **S2** (140 mg, 397  $\mu$ mol) as a colorless oil.

$R_f = 0.54$  (*n*-pentane/EtOAc, 10:1).

$[\alpha]_D^{29} = -2.66$  ( $c = 0.45$ ,  $CHCl_3$ ).

**$^1H$ -NMR** (700 MHz,  $CDCl_3$ ):  $\delta$  [ppm] = 5.89 – 5.86 (m, 1H), 5.15 – 5.10 (m, 1H), 2.69 (t,  $J = 6.2$  Hz, 1H), 2.25 – 2.21 (m, 2H), 2.19 – 2.11 (m, 3H), 2.08 (dt,  $J = 14.4, 7.5$  Hz, 1H), 1.84 (s, 3H), 1.64 – 1.60 (m, 5H), 1.31 (s, 3H), 1.26 (s, 3H).

**$^{13}C$ -NMR** (176 MHz,  $CDCl_3$ ):  $\delta$  [ppm] = 147.8, 135.4, 123.7, 74.9, 64.3, 58.5, 39.6, 36.5, 27.6, 26.4, 25.1, 24.1, 18.9, 16.2.

**IR** ( $\nu/cm^{-1}$ , ATR) = 2958, 2923, 2855, 1447, 1377, 1322, 1267, 1139, 1120, 872.

**HRMS (ESI)**:  $m/z$  calculated for  $C_{14}H_{24}IO^+$   $[M+H]^+$ : 335.0867, found 335.0869.

## Compound **12**

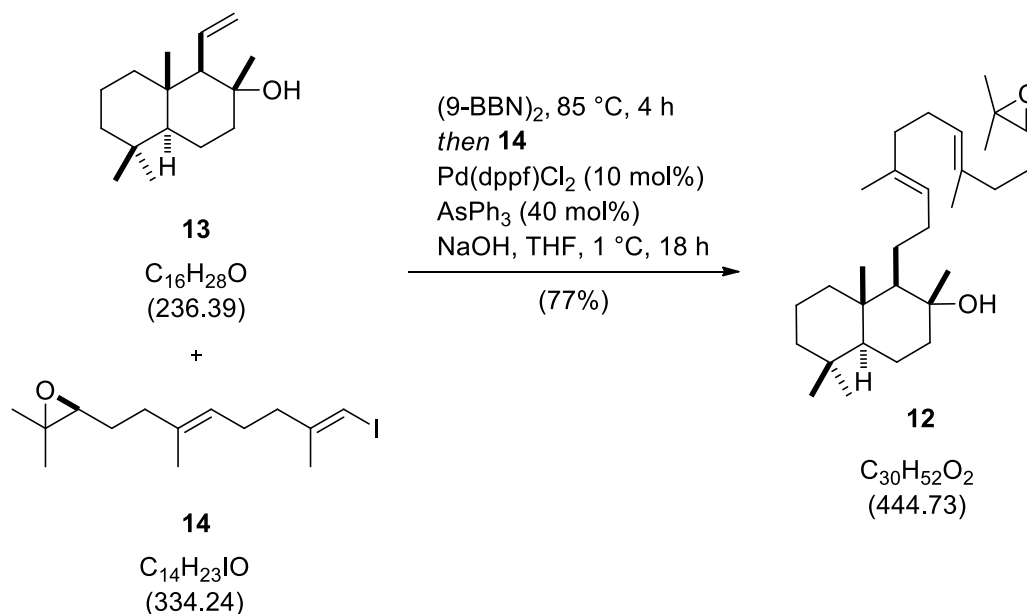

Alkene **13** (1.18 g, 4.97 mmol, 1.4 eq.) and 9-BBN dimer<sup>5</sup> (1.21 g, 9.94 mmol, 2.8 eq.) were combined and stirred for 5 min, then the reaction flask was heated to 85 °C for 4 h. The reaction flask was allowed to cool to 23 °C and THF (10 mL, degassed by freeze pump thaw 3x) was added. The reaction flask was cooled to 0 °C and NaOH (7.10 mL, 3 M, 21.3 mmol, 6.0 eq., purged with Ar for 20 min) was added dropwise. A solution of epoxide **14** (1.19 g, 3.55 mmol, 1.0 eq.) and AsPh<sub>3</sub> (435 mg, 1.42 mmol, 40 mol%) in THF (6 mL, purged with Ar for 20 min, the flask was rinsed 2x with 1 mL) was added to the reaction mixture. The reaction mixture was purged with Ar for 5 min. Pd(dppf)Cl<sub>2</sub> (260 mg, 355 μmol, 10 mol%) was added and the reaction mixture was stirred at 1 °C for 18 h. Water and EtOAc were added to the reaction mixture sequentially. The organic phase was separated and the aqueous phase was extracted with EtOAc. The combined organic extracts were washed with brine, dried over MgSO<sub>4</sub>, filtered and concentrated under reduced pressure. The residue was purified by flash column chromatography (SiO<sub>2</sub>, *n*-pentane/EtOAc 40:1 to 1:1) to afford epoxy dienol **12** (1.22 g, 2.75 mmol, 77%) as a colorless oil.

$R_f = 0.64$  (*n*-pentane/EtOAc, 5:1).

$[\alpha]_{\text{D}}^{29} = +0.52$  ( $c = 0.64$ , CHCl<sub>3</sub>).

**<sup>1</sup>H-NMR** (700 MHz, CDCl<sub>3</sub>):  $\delta$  [ppm] = 5.20 – 5.13 (m, 2H), 2.70 (t,  $J = 6.3$  Hz, 1H), 2.19 – 2.11 (m, 1H), 2.11 – 2.03 (m, 5H), 1.99 (t,  $J = 7.7$  Hz, 2H), 1.86 (dt,  $J = 12.3, 3.2$  Hz, 1H), 1.69 – 1.62 (m, 4H), 1.62 – 1.61 (m, 3H), 1.61 – 1.60 (m, 3H), 1.60 – 1.55 (m, 2H), 1.46 – 1.40 (m, 2H), 1.40 – 1.33 (m, 2H), 1.29 (s, 3H), 1.27 – 1.24 (m, 4H), 1.20 (s, 1H), 1.15 (dd,  $J = 13.6, 4.2$

Hz, 1H), 1.12 (s, 3H), 1.03 (t,  $J = 4.0$  Hz, 1H), 0.97 (td,  $J = 13.0, 3.8$  Hz, 1H), 0.91 (dd,  $J = 12.2, 2.4$  Hz, 1H), 0.86 (s, 3H), 0.78 (s, 6H).

**$^{13}\text{C}$ -NMR** (176 MHz,  $\text{CDCl}_3$ ):  $\delta$  [ppm] = 135.1, 134.2, 125.3, 125.1, 74.2, 64.3, 61.7, 58.5, 56.3, 44.7, 42.2, 39.9, 39.8, 39.3, 36.5, 33.6, 33.4, 31.6, 27.6, 26.8, 25.7, 25.1, 24.0, 21.7, 20.7, 18.9, 18.6, 16.4, 16.2, 15.6.

**IR** ( $\text{v}/\text{cm}^{-1}$ , ATR) = 3479, 2924, 2852, 1458, 1384, 1249, 1158, 1044, 938, 756.

**HRMS (ESI)**:  $m/z$  calculated for  $\text{C}_{30}\text{H}_{52}\text{O}_2\text{Na}^+$   $[\text{M}+\text{Na}]^+$  467.3859, found 467.3867.

## Compound **10** and compound **21**

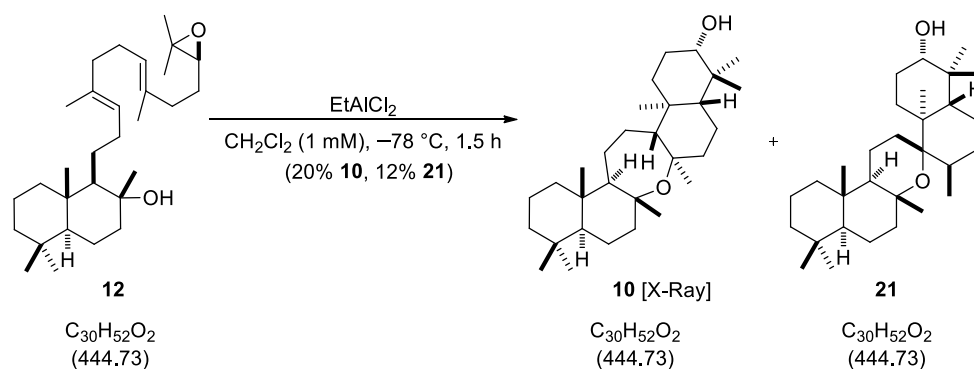

To a solution of  $\text{EtAlCl}_2$  (0.20 mL, 1 M in hexane, 0.20 mmol, 3.0 eq.) in  $\text{CH}_2\text{Cl}_2$  (33 mL) at  $-78\text{ }^\circ\text{C}$  was added a precooled solution of epoxy dienol **12** (29.3 mg, 66.0  $\mu\text{mol}$ , 1.0 eq.) in  $\text{CH}_2\text{Cl}_2$  (33 mL) over 1 h (cannula passing through dry ice). The reaction mixture was then stirred for 30 min at the same temperature.  $\text{NH}_3$  (aq., 0.2 mL) and  $\text{MeOH}/\text{H}_2\text{O}$  (4:1, 0.2 mL) were added successively. The reaction mixture was allowed to reach  $23\text{ }^\circ\text{C}$ , and then a solution of saturated aqueous Rochelle salt was added. The organic phase was separated and the aqueous phase was extracted with  $\text{CH}_2\text{Cl}_2$ . The combined organic extracts were washed with brine, dried over  $\text{MgSO}_4$ , filtered and concentrated under reduced pressure. The residue was purified by flash column chromatography ( $\text{SiO}_2$ , *n*-pentane/ $\text{EtOAc}$  1:0 to 15:1 to 10:1 to 5:1) to afford alcohol **10** (5.9 mg, 13  $\mu\text{mol}$ , 20%) as a white solid and oxane **21** (3.4 mg, 7.6  $\mu\text{mol}$ , 12%) as a colorless oil. Crystals of **10** suitable for single crystal X-ray diffraction were obtained after slow evaporation from  $\text{CH}_2\text{Cl}_2/\text{MeCN}$ .

## Compound **10**

$R_f = 0.48$  (*n*-pentane/ $\text{EtOAc}$ , 9:1).

$[\alpha]_{\text{D}}^{28} = +6.3$  ( $c = 0.49$ ,  $\text{CH}_2\text{Cl}_2$ ).

**$^1\text{H-NMR}$**  (700 MHz,  $\text{C}_6\text{D}_6$ ):  $\delta$  [ppm] = 3.03 – 2.96 (m, 1H), 1.94 (ddt,  $J = 16.0, 12.8, 3.3$  Hz, 2H), 1.82 – 1.65 (m, 4H), 1.64 – 1.48 (m, 3H), 1.47 – 1.39 (m, 6H), 1.37 – 1.32 (m, 3H), 1.36 (s, 3H), 1.35 (s, 3H), 1.22 – 1.15 (m, 4H), 0.95 (s, 3H), 0.91 – 0.89 (m, 1H), 0.87 – 0.82 (m, 3H), 0.85 (s, 3H), 0.79 (s, 3H), 0.75 – 0.73 (m, 1H), 0.74 (s, 3H), 0.74 (s, 3H), 0.68 (s, 3H).

**$^{13}\text{C-NMR}$**  (176 MHz,  $\text{C}_6\text{D}_6$ ):  $\delta$  [ppm] = 80.1, 79.9, 78.4, 61.1 (2C), 56.6, 55.5, 45.8, 45.6, 42.3, 40.6, 39.2, 39.1, 38.9, 38.7, 33.7, 33.6, 28.4, 28.1, 25.7, 25.5 (2C), 25.3, 21.8, 21.2, 20.8, 19.3, 16.1 (2C), 15.7.

**IR** ( $\text{v}/\text{cm}^{-1}$ , ATR) = 3394, 2924, 2855, 1458, 1377, 1283, 1187, 1126, 1084, 1043.

**HRMS (ESI):**  $m/z$  calculated for  $C_{30}H_{52}O_2Na^+$   $[M+Na]^+$  467.3859, found 467.3848. **Mp** = 197 – 199 °C.

Note: The use of fresh  $EtAlCl_2$  is necessary for reproducible yield. **10** showed signs of decomposition after treatment with  $CDCl_3$  (unpurified) for 12 h.

Compound **21**

**R<sub>f</sub>** = 0.50 (*n*-pentane/EtOAc, 9:1).

$[\alpha]_D^{28} = -3.9$  ( $c = 0.28$ ,  $CH_2Cl_2$ ).

**<sup>1</sup>H-NMR** (700 MHz,  $C_6D_6$ ):  $\delta$  [ppm] = 3.01 (dd,  $J = 11.2, 4.1$  Hz, 1H), 1.99 – 1.90 (m, 1H), 1.86 – 1.81 (m, 1H), 1.71 – 1.67 (m, 1H), 1.66 – 1.28 (m, 20H), 1.30 (s, 3H), 1.17 (s, 3H), 1.11 – 1.09 (m, 1H), 1.03 (s, 3H), 1.01 (d,  $J = 6.7$  Hz, 3H), 0.91 – 0.89 (m, 1H), 0.86 – 0.84 (m, 2H), 0.85 (s, 3H), 0.81 (s, 3H), 0.78 (s, 3H), 0.68 (s, 3H).

**<sup>13</sup>C NMR** (176 MHz,  $C_6D_6$ ):  $\delta$  [ppm] = 80.8, 78.9, 75.0, 57.1, 54.5, 47.5, 45.2, 43.6, 42.4, 40.0, 39.1, 38.3, 37.3, 33.5, 33.4, 32.9, 32.1, 28.8, 28.2, 26.4, 24.3, 21.5 (2C), 21.2, 19.1, 18.0, 17.5, 16.0, 15.5, 15.2.

**IR** ( $\nu/cm^{-1}$ , ATR) = 3415, 2927, 2867, 1462, 1380, 1322, 1045, 1017, 998, 976.

**HRMS (ESI):**  $m/z$  calculated for  $C_{30}H_{52}O_2Na^+$   $[M+Na]^+$  467.3859, found 467.3850.

## Compound **22**

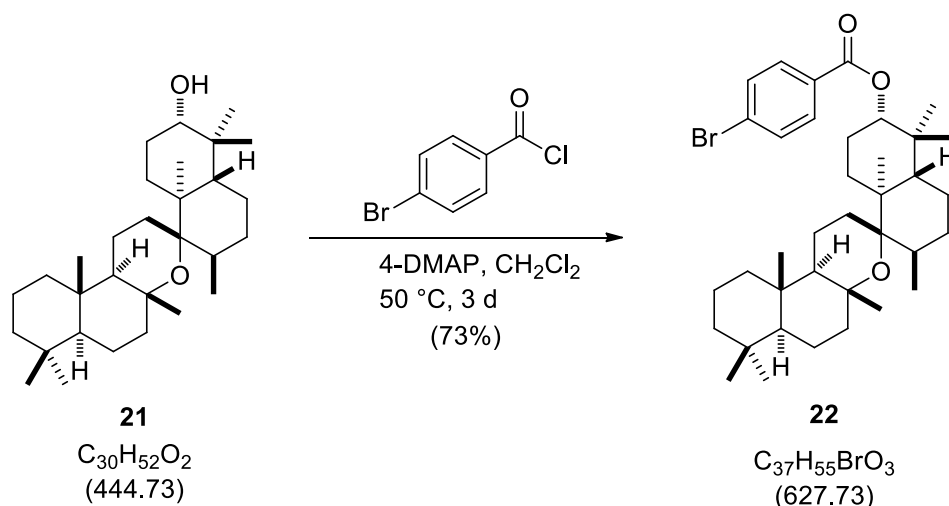

To a solution of oxane **21** (3.6 mg, 8.1  $\mu\text{mol}$ , 1.0 eq.) in  $\text{CH}_2\text{Cl}_2$  (1 mL) at 23  $^\circ\text{C}$  was added *N,N*-dimethyl-4-aminopyridine (19.8 mg, 162  $\mu\text{mol}$ , 20 eq.) and 4-bromobenzoyl chloride (9.1 mg, 41  $\mu\text{mol}$ , 5.0 eq.). The reaction mixture was stirred for 3 d at 50  $^\circ\text{C}$  in a closed vial. The residue was directly purified by flash column chromatography ( $\text{SiO}_2$ , *n*-pentane/EtOAc 1:0 to 20:1 to 5:1) to afford ester **22** (3.7 mg, 5.9  $\mu\text{mol}$ , 73%) as a white solid. Crystals suitable for single crystal X-ray diffraction were obtained after slow evaporation from 1,2-dichloroethane, 2-propanol and benzene.

$R_f = 0.80$  (*n*-pentane/EtOAc, 9:1).

$[\alpha]_{\text{D}}^{25} = -2.4$  ( $c = 0.07$ ,  $\text{CHCl}_3$ ).

**$^1\text{H-NMR}$**  (700 MHz,  $\text{CDCl}_3$ ):  $\delta$  [ppm] =  $\delta$  7.91 (d,  $J = 8.5$  Hz, 2H), 7.58 (d,  $J = 8.5$  Hz, 2H), 4.69 – 4.62 (m, 1H), 1.94 – 1.86 (m, 1H), 1.85 – 1.79 (m, 1H), 1.79 – 1.69 (m, 3H), 1.68 – 1.58 (m, 6H), 1.49 – 1.35 (m, 6H), 1.27 – 1.24 (m, 6H), 1.22 – 1.16 (m, 2H), 1.14 – 1.08 (m, 2H), 1.04 (s, 3H), 1.01 (s, 3H), 0.92 (d,  $J = 6.6$  Hz, 3H), 0.89 (s, 3H), 0.89 – 0.86 (m, 2H), 0.85 (s, 3H), 0.78 (s, 3H), 0.73 (s, 3H).

**$^{13}\text{C-NMR}$**  (176 MHz,  $\text{CDCl}_3$ ):  $\delta$  [ppm] = 165.9, 131.8 (2C), 131.2 (2C), 130.0, 128.0, 82.6, 80.7, 75.1, 56.9, 54.0, 47.4, 44.8, 43.3, 42.3, 39.7, 38.2, 38.1, 37.2, 33.5, 33.4, 32.4, 31.7, 28.7, 26.2, 24.2, 24.0, 21.4, 21.2, 21.0, 18.8, 17.6, 17.2, 16.7, 15.9, 15.0.

**IR** ( $\nu/\text{cm}^{-1}$ , ATR) = 2925, 2854, 1718, 1591, 1461, 1396, 1377, 1271, 847, 757.

**HRMS (EI)**:  $m/z$  calculated for  $\text{C}_{37}\text{H}_{55}\text{O}_3\text{Br}^+$  [ $\text{M}$ ] $^+$ : 626.3329, found 626.3308.

**Mp** = 182 – 184  $^\circ\text{C}$ .

## Cupacinoxepin 4

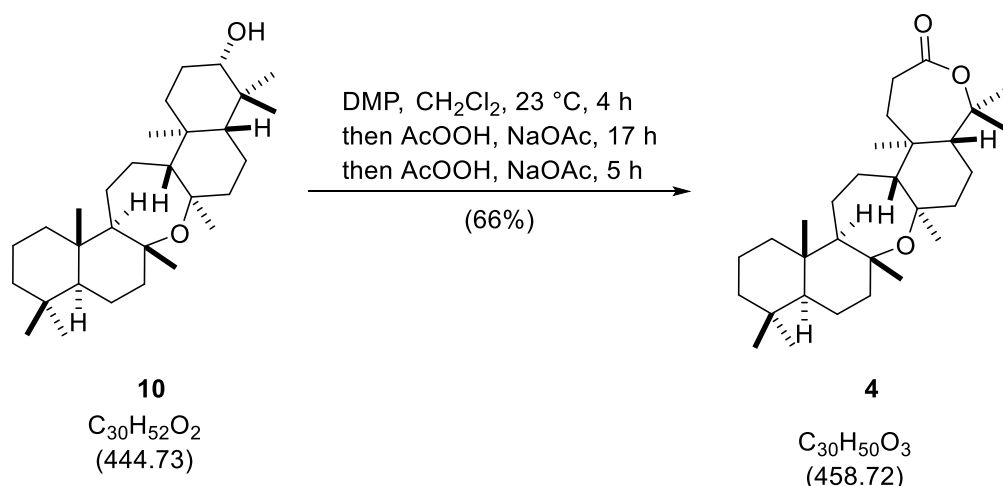

To a solution of alcohol **10** (5.7 mg, 13  $\mu\text{mol}$ , 1.0 eq.) in  $\text{CH}_2\text{Cl}_2$  (2.5 mL) at 23  $^\circ\text{C}$  was added Dess-Martin periodinane (DMP)<sup>6</sup> (10.9 mg, 26  $\mu\text{mol}$ , 2.0 eq.). The reaction mixture was stirred for 4 h. Afterwards, NaOAc (34.9 mg, 256  $\mu\text{mol}$ , 20 eq.) and AcOOH (24.6  $\mu\text{L}$ , 27.8 mg, 128  $\mu\text{mol}$ , 35% in acetic acid, 10 eq.) were added successively. The reaction flask was covered with aluminum foil and stirred for 17 h. Another portion of NaOAc (34.9 mg, 256  $\mu\text{mol}$ , 20 eq.) and AcOOH (24.6  $\mu\text{L}$ , 27.8 mg, 128  $\mu\text{mol}$ , 35% in acetic acid, 10 eq.) were added successively. The reaction mixture was stirred for 5 h. The residue was directly purified by flash column chromatography ( $\text{SiO}_2$ , *n*-pentane/EtOAc 1:0 to 10:1 to 5:1 and  $\text{Al}_2\text{O}_3$ , *n*-pentane/EtOAc 1:0 to 5:1 and  $\text{SiO}_2$ , toluene/Et<sub>2</sub>O 5:1 to 1:1) to afford cupacinoxepin **4** (3.9 mg, 8.5  $\mu\text{mol}$ , 66%) as a white solid. Crystals suitable for single crystal X-ray diffraction were obtained after slow evaporation from acetone/*n*-hexane.

$R_f = 0.40$  (*n*-pentane/EtOAc, 4:1).

$[\alpha]_{\text{D}}^{26} = +49.0$  ( $c = 0.04$ ,  $\text{CHCl}_3$ ) [ $\text{Lit}^7: [\alpha]_{\text{D}}^{22} = +56.4$  ( $c = 1.3$ ,  $\text{CHCl}_3$ )].

**<sup>1</sup>H-NMR** (500 MHz,  $\text{CDCl}_3$ ):  $\delta$  [ppm] = 2.66 (td,  $J = 13.8, 4.8$  Hz, 1H), 2.48 (ddd,  $J = 14.2, 5.2, 3.5$  Hz, 1H), 1.93 – 1.81 (m, 3H), 1.80 – 1.69 (m, 4H), 1.69 – 1.58 (m, 3H), 1.59 – 1.49 (m, 5H), 1.48 (s, 3H), 1.47 – 1.39 (m, 2H), 1.36 (s, 3H), 1.36 – 1.32 (m, 2H), 1.29 (s, 3H), 1.25 (s, 3H), 1.24 – 1.17 (m, 2H), 1.13 (td,  $J = 13.5, 4.3$  Hz, 1H), 1.00 (s, 3H), 0.93 – 0.86 (m, 2H), 0.85 (s, 3H), 0.77 (s, 3H), 0.74 (s, 3H).

**<sup>13</sup>C-NMR** (176 MHz,  $\text{CDCl}_3$ ):  $\delta$  [ppm] = 175.0, 85.9, 80.5, 78.9, 61.4, 61.0, 56.3, 52.2, 45.3, 43.7, 42.1, 41.2, 40.5, 40.3, 39.0, 33.6 (2C), 32.6, 30.8, 27.4, 26.5, 26.0, 25.5, 25.2, 24.2, 21.6, 20.9, 19.0, 18.4, 16.0.

**IR** ( $\nu/\text{cm}^{-1}$ , ATR) = 2922, 2854, 1719, 1459, 1375, 1286, 1131, 1022, 977, 753.

**HRMS (EI):**  $m/z$  calculated for  $\text{C}_{30}\text{H}_{50}\text{O}_3^+$   $[\text{M}]^+$ : 458.3754, found 458.3776.

**Mp:** 204 – 207 °C.

## Thiocarbamate **S5**

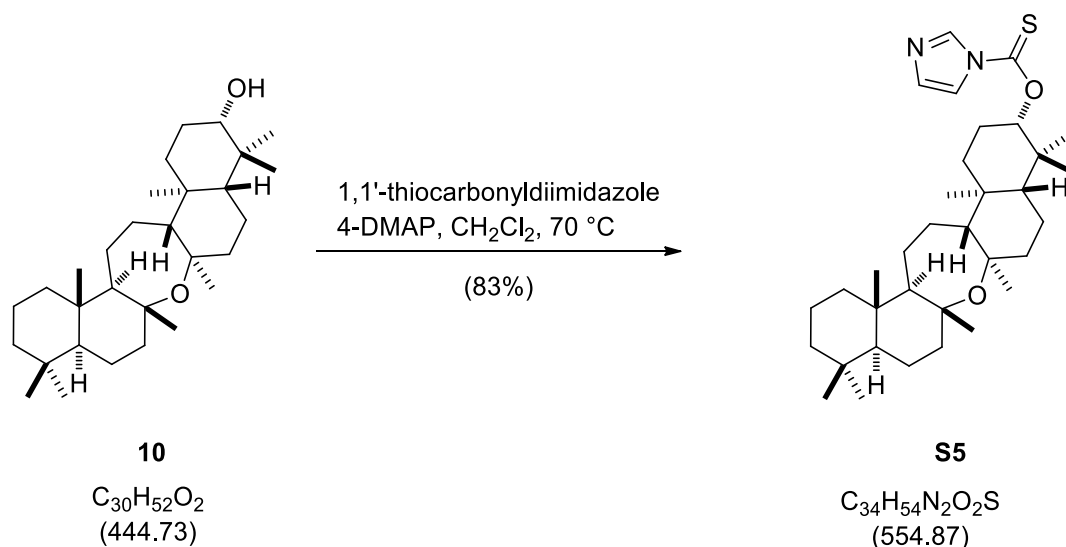

To a solution of alcohol **10** (8.2 mg, 18  $\mu\text{mol}$ , 1.0 eq.) in  $\text{CH}_2\text{Cl}_2$  (2.5 mL) at 23 °C was added 1,1'-thiocarbonyldiimidazole (69.2 mg, 369  $\mu\text{mol}$ , 20 eq.) and *N,N*-dimethyl-4-aminopyridine (45.1 mg, 369  $\mu\text{mol}$ , 20 eq.). The reaction mixture was stirred for 13.5 h in a pressure tube at 70 °C. The residue was directly purified by flash column chromatography ( $\text{SiO}_2$ , *n*-pentane/EtOAc 1:0 to 10:1 to 5:1) to afford thiocarbamate **S5** (8.5 mg, 15  $\mu\text{mol}$ , 83%) as a white solid.

$R_f = 0.32$  (*n*-pentane/EtOAc, 9:1).

$[\alpha]_D^{25} = +36.2$  ( $c = 0.71$ ,  $\text{CH}_2\text{Cl}_2$ ).

**$^1\text{H}$ -NMR** (700 MHz,  $\text{C}_6\text{D}_6$ ):  $\delta$  [ppm] = 8.41 (s, 1H), 7.52 – 7.48 (m, 1H), 7.02 – 6.95 (m, 1H), 5.12 (dd,  $J = 12.0, 4.7$  Hz, 1H), 1.97 (dt,  $J = 12.6, 3.2$  Hz, 1H), 1.87 (dt,  $J = 12.8, 3.2$  Hz, 1H), 1.84 – 1.73 (m, 4H), 1.68 – 1.55 (m, 4H), 1.51 (dt,  $J = 13.3, 3.7$  Hz, 1H), 1.48 – 1.45 (m, 1H), 1.45 – 1.40 (m, 1H), 1.40 – 1.35 (m, 5H), 1.34 – 1.31 (m, 4H), 1.27 – 1.11 (m, 6H), 1.08 – 1.00 (m, 1H), 0.89 – 0.87 (m, 4H), 0.86 – 0.83 (m, 1H), 0.82 (s, 3H), 0.79 (s, 3H), 0.70 (dd,  $J = 12.3, 2.3$  Hz, 1H), 0.66 (s, 3H), 0.65 (s, 3H), 0.60 (s, 3H).

**$^{13}\text{C}$ -NMR** (176 MHz,  $\text{C}_6\text{D}_6$ ):  $\delta$  [ppm] = 184.6, 136.7, 131.6, 118.3, 91.1, 80.3, 79.6, 60.9, 60.7, 56.6, 55.0, 45.5, 45.5, 42.3, 40.7, 39.2, 38.6, 38.4, 38.1, 33.7, 33.6, 28.0, 25.8, 25.6, 25.3, 25.1, 22.6, 21.8, 21.3, 20.3, 19.3, 17.3, 16.2, 15.9.

**IR** ( $\text{v}/\text{cm}^{-1}$ , ATR) = 2948, 2865, 1530, 1461, 1385, 1281, 1230, 1127, 1092, 970.

**HRMS (ESI)**:  $m/z$  calculated for  $\text{C}_{34}\text{H}_{55}\text{N}_2\text{O}_2\text{S}^+ [\text{M}+\text{H}]^+$ : 555.3979, found 555.3988.

**Mp**: 199 – 202 °C.

## Onoceranoxide **7**

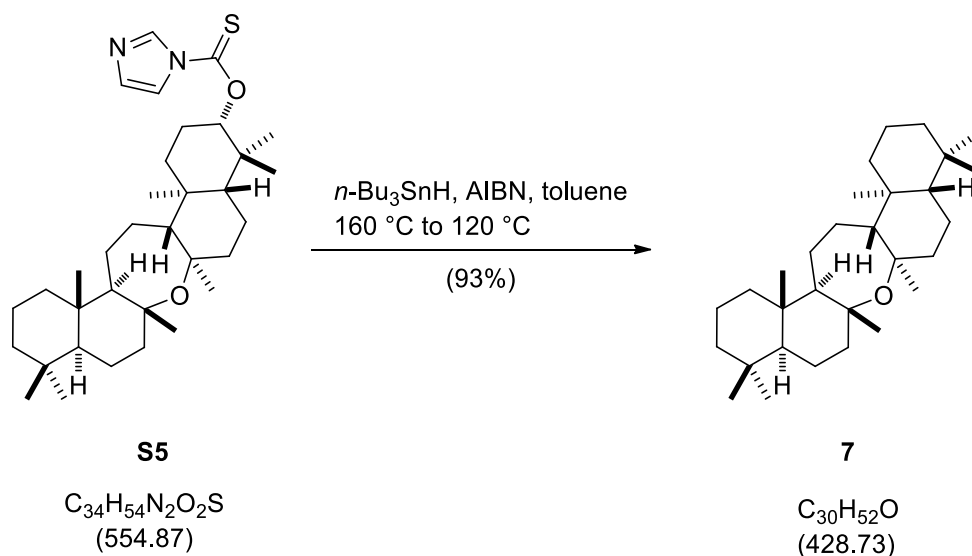

To a solution of thiocarbamate **S5** (6.0 mg, 11  $\mu\text{mol}$ , 1.0 eq.) in toluene (4.0 mL, degassed by sparging with Ar for 20 min) at 23  $^\circ\text{C}$  was added *n*-Bu<sub>3</sub>SnH (8.7  $\mu\text{L}$ , 9.4 mg, 32  $\mu\text{mol}$ , 3.0 eq.) and AIBN (one crystal). The reaction mixture was stirred for 10 min at 160  $^\circ\text{C}$  and for 20 min at 120  $^\circ\text{C}$  in a pressure tube. Another portion of *n*-Bu<sub>3</sub>SnH (8.7  $\mu\text{L}$ , 9.4 mg, 32  $\mu\text{mol}$ , 3.0 eq.) and AIBN (one crystal) were added and the reaction mixture was stirred for 10 min at 160  $^\circ\text{C}$  and for 20 min at 120  $^\circ\text{C}$  in a pressure tube. The solvent was evaporated and the residue was directly purified by flash column chromatography (SiO<sub>2</sub>, *n*-pentane/EtOAc 1:0 to 50:1 to 10:1) to afford onoceranoxide **7** (4.3 mg, 10  $\mu\text{mol}$ , 93%) as a white solid.

$R_f = 0.25$  (*n*-pentane).

$[\alpha]_D^{26} = +19.7$  ( $c = 0.36$ , CHCl<sub>3</sub>) [Lit<sup>8</sup>: $[\alpha]_D^{26} = +7.9$ ] [Lit<sup>9</sup>: $[\alpha]_D^{25} = +0.02$  ( $c = 0.16$ , CHCl<sub>3</sub>)].

**<sup>1</sup>H-NMR** (700 MHz, CDCl<sub>3</sub>):  $\delta$  [ppm] = 1.79 – 1.72 (m, 6H), 1.60 – 1.56 (m, 6H), 1.44 – 1.38 (m, 4H), 1.35 – 1.33 (m, 2H), 1.27 – 1.25 (m, 8H), 1.22 – 1.21 (m, 2H), 1.14 – 1.10 (m, 2H), 0.89 – 0.87 (m, 4H), 0.85 (s, 6H), 0.77 (s, 6H), 0.74 (s, 6H).

**<sup>1</sup>H-NMR** (700 MHz, C<sub>6</sub>D<sub>6</sub>):  $\delta$  [ppm] = 1.97 (dt,  $J = 12.7, 3.3$  Hz, 2H), 1.84 – 1.71 (m, 6H), 1.63 – 1.54 (m, 4H), 1.50 – 1.46 (m, 2H), 1.42 – 1.26 (m, 12H), 1.20 – 1.11 (m, 4H), 0.89 – 0.82 (m, 10H), 0.80 (s, 6H), 0.76 (s, 6H).

**<sup>13</sup>C-NMR** (176 MHz, CDCl<sub>3</sub>):  $\delta$  [ppm] = 80.1 (2C), 60.9 (2C), 56.3 (2C), 45.4 (2C), 42.2 (2C), 40.5 (2C), 39.0 (2C), 33.6 (2C), 33.6 (2C), 25.4 (2C), 25.1 (2C), 21.7 (2C), 20.9 (2C), 19.1 (2C), 15.9 (2C).

**<sup>13</sup>C-NMR** (176 MHz, C<sub>6</sub>D<sub>6</sub>): δ [ppm] = 80.1 (2C), 61.3 (2C), 56.5 (2C), 45.8 (2C), 42.3 (2C), 40.7 (2C), 39.1 (2C), 33.7 (2C), 33.6 (2C), 25.7 (2C), 25.4 (2C), 21.8 (2C), 21.2 (2C), 19.3 (2C), 16.1 (2C).

**IR** (ν/cm<sup>-1</sup>, ATR) = 2989, 2927, 2857, 1459, 1371, 1261, 1193, 1086, 1024, 970.

**HRMS (ESI)**: *m/z* calculated for C<sub>30</sub>H<sub>52</sub>ONa<sup>+</sup> [M+Na]<sup>+</sup>: 451.3910, found 451.3907.

**Mp**: 203 - 205 °C.

Note: For a previous enzymatic synthesis, see:<sup>9</sup>

8 $\alpha$ -hydroxypolypoda-13,17,21 **9**

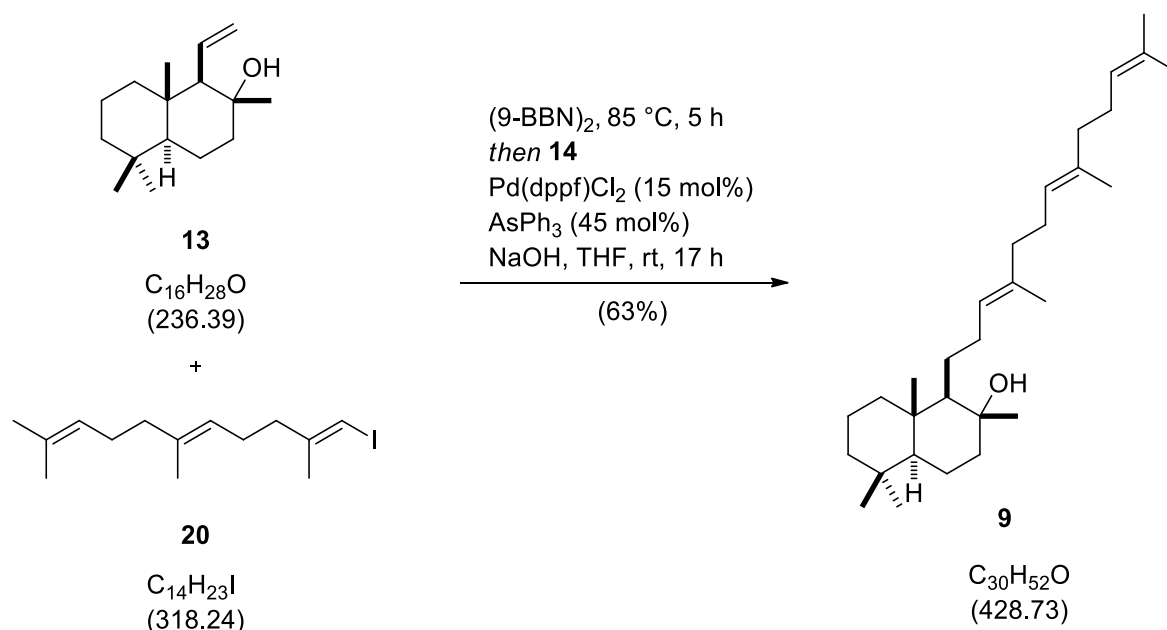

Alkene **13** (0.201 g, 850  $\mu$ mol, 1.0 eq.) and 9-BBN dimer<sup>5</sup> (259 mg, 2.13 mmol, 2.5 eq.) were combined and stirred for 5 min, then the reaction flask was heated to 85 °C for 5 h. The reaction flask was allowed to cool to 23 °C and THF (10 mL, degassed by freeze pump thaw 3x) and NaOH (1.70 mL, 3 M, 5.10 mmol, 6.0 eq., purged with Ar for 20 min) was added. A solution of vinyl iodide **20** (547 mg, 1.72 mmol, 2.0 eq.) and AsPh<sub>3</sub> (117 mg, 0.383  $\mu$ mol, 45 mol%) in THF (4 mL, purged with Ar for 20 min, the flask was rinsed 2x with 0.5 mL) was added to the reaction mixture. The reaction mixture was purged with Ar for 5 min. Pd(dppf)Cl<sub>2</sub> (93.3 mg, 128  $\mu$ mol, 15 mol%) was added and the reaction mixture was stirred at 23 °C for 17 h. Water and EtOAc were added to the reaction mixture sequentially. The organic phase was separated and the aqueous phase was extracted with EtOAc. The combined organic extracts were washed with brine, dried over MgSO<sub>4</sub>, filtered and concentrated under reduced pressure. The residue was purified by flash column chromatography (SiO<sub>2</sub>, *n*-pentane/EtOAc 50:1 to 10:1) to afford triene **9** (229 mg, 534  $\mu$ mol, 63%) as a slightly yellow oil.

$R_f$  = 0.54 (*n*-pentane/EtOAc, 19:1).

$[\alpha]_D^{25} = -0.39$  ( $c = 0.77$ , CHCl<sub>3</sub>), [Lit<sup>10</sup>: $[\alpha]_D^{23} = -0.9$  ( $c = 0.4$ , CHCl<sub>3</sub>)],

[Lit<sup>11</sup>: $[\alpha]_D^{24} = -0.6$  ( $c = 0.75$ , CHCl<sub>3</sub>)], [Lit<sup>12</sup>: $[\alpha]_D^{23} = -1.8$  ( $c = 0.1$ , CHCl<sub>3</sub>)].

<sup>1</sup>H-NMR (500 MHz, CDCl<sub>3</sub>):  $\delta$  [ppm] = 5.21 – 5.16 (m, 1H), 5.14 – 5.06 (m, 2H), 2.12 – 2.03 (m, 6H), 2.02 – 1.93 (m, 4H), 1.86 (dt,  $J = 12.1, 3.1$  Hz, 1H), 1.68 (s, 3H), 1.67 – 1.62 (m, 1H), 1.61 (s, 3H), 1.60 (s, 6H), 1.58 – 1.54 (m, 1H), 1.48 – 1.14 (m, 9H), 1.13 (s, 3H), 1.03 (t,  $J =$

4.0 Hz, 1H), 0.98 (td,  $J = 13.0, 3.7$  Hz, 1H), 0.91 (dd,  $J = 12.1, 2.3$  Hz, 1H), 0.87 (s, 3H), 0.79 (s, 6H).

**$^{13}\text{C}$ -NMR** (126 MHz,  $\text{CDCl}_3$ ):  $\delta$  [ppm] = 135.3, 135.1, 131.4, 125.2, 124.6, 124.4, 74.2, 61.7, 56.3, 44.7, 42.2, 39.9 (3C), 39.3, 33.6, 33.4, 31.6, 26.9, 26.8, 25.9, 25.7, 23.9, 21.7, 20.7, 18.6, 17.8, 16.4, 16.2, 15.6.

**IR** ( $\text{v}/\text{cm}^{-1}$ , ATR) = 3424, 2925, 2860, 1450, 1383, 1157, 1080, 934, 822, 802.

**HRMS (ESI)**:  $m/z$  calculated for  $\text{C}_{30}\text{H}_{52}\text{ONa}^+$   $[\text{M}+\text{Na}]^+$ : 451.3910, found 451.3931.

Note: **9** was isolated from fresh rhizomes of *Polypodiodes formosana* in 1992.<sup>10</sup> **9** was synthesized in 3 steps in the longest linear synthesis from (+)-sclareolide with an overall yield of 28% and was used as a tricyclization substrate. However, no productive cyclization could be detected under a variety of conditions. For selected conditions see Section 3.

For a previous 13 step racemic synthesis, see:<sup>13</sup>.

For a previous enzymatic synthesis, see:<sup>9, 12</sup>.

For a previous 10 step asymmetric synthesis, see:<sup>11</sup>.

## Compound S6

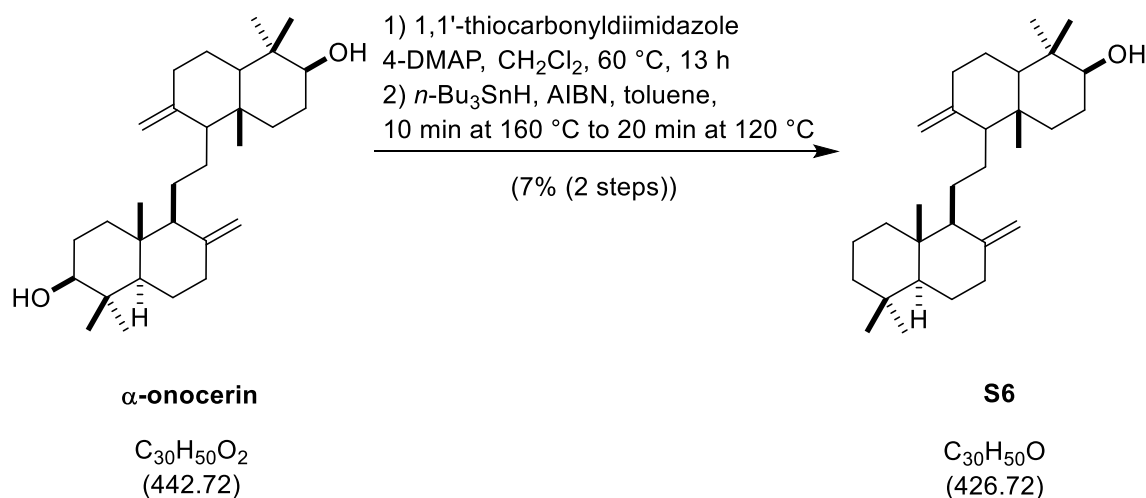

To a solution of  $\alpha$ -onocerin (20.0 mg, 45.2  $\mu$ mol, 1.0 eq.) in CH<sub>2</sub>Cl<sub>2</sub> (4.0 mL) at 23 °C was added *N,N*-dimethyl-4-aminopyridine (11.0 mg, 90.4  $\mu$ mol, 2.0 eq.) and 1,1'-thiocarbonyldiimidazole (16.1 mg, 90.4  $\mu$ mol, 2.0 eq.). Then the reaction mixture was stirred for 13 h at 60 °C in a closed vial. The residue was directly purified by flash chromatography (SiO<sub>2</sub>, *n*-pentane/EtOAc 30:1 to 4:1 to 2:1) to afford an inseparable mixture (17.5 mg). An aliquot of the obtained material (6.2 mg) was dissolved in toluene (degassed by sparging with Ar for 20 min, 4 mL) in a pressure tube and AIBN (one crystal) and Bu<sub>3</sub>SnH (9.10  $\mu$ L, 33.6  $\mu$ mol, 0.74 eq.) were added successively. The reaction mixture was stirred at 160 °C for 10 min and at 120 °C for 20 min. The residue was directly purified by flash column chromatography (SiO<sub>2</sub>, *n*-pentane/EtOAc 4:1) to afford alcohol **S6** (1.3 mg, 3.05  $\mu$ mol, 7%) as a white solid.

**R<sub>f</sub>** = 0.81 (*n*-pentane/EtOAc, 4:1).

**$[\alpha]_{\text{D}}^{23}$**  = +11.6 (*c* = 0.48, CHCl<sub>3</sub>) [Lit<sup>14</sup>:  **$[\alpha]_{\text{D}}$**  = +21° (*c* = 1.70, CHCl<sub>3</sub>)].

**<sup>1</sup>H-NMR** (700 MHz, CDCl<sub>3</sub>):  $\delta$  [ppm] =  $\delta$  4.87 – 4.77 (m, 2H), 4.60 – 4.49 (m, 2H), 3.25 (dd, *J* = 11.8, 4.3 Hz, 1H), 2.40 (dddd, *J* = 13.0, 11.1, 4.3, 2.4 Hz, 2H), 1.98 (td, *J* = 12.9, 5.0 Hz, 2H), 1.76 – 1.65 (m, 5H), 1.60 – 1.07 (m, 17H), 0.99 (s, 3H), 0.94 (td, *J* = 12.9, 3.8 Hz, 1H), 0.87 (s, 3H), 0.79 (s, 3H), 0.76 (s, 3H), 0.64 (s, 3H), 0.63 (s, 3H).

**<sup>13</sup>C-NMR** (176 MHz, CDCl<sub>3</sub>):  $\delta$  [ppm] = 149.3, 148.6, 106.8, 106.4, 79.1, 58.1, 57.8, 55.8, 54.8, 42.4, 39.7, 39.4, 39.3, 39.2, 38.6, 38.4, 37.2, 33.8 (2C), 28.5, 28.1, 24.7, 24.2, 22.9, 22.7, 21.9, 19.6, 15.5, 14.7 (2C).

**IR** ( $\nu$ /cm<sup>-1</sup>, ATR) = 3350, 3082, 2932, 2846, 1460, 1385, 1227, 1182, 1032, 886.

**HRMS (ESI):**  $m/z$  calculated for  $C_{30}H_{50}ONa^+$   $[M+Na]^+$ : 449.3754, found 449.3739.

**Mp:** 178 – 180 °C [Lit<sup>14</sup>: 182 – 184].

Note: This procedure is unoptimized.  $\alpha$ -Onocerin was extracted from spiny restharrow roots.<sup>15</sup>

Compound **S6** is used as a GC-MS reference to get insight into the structure of the elimination product of the BmeTC catalyzed reaction with **12**. See section 6.

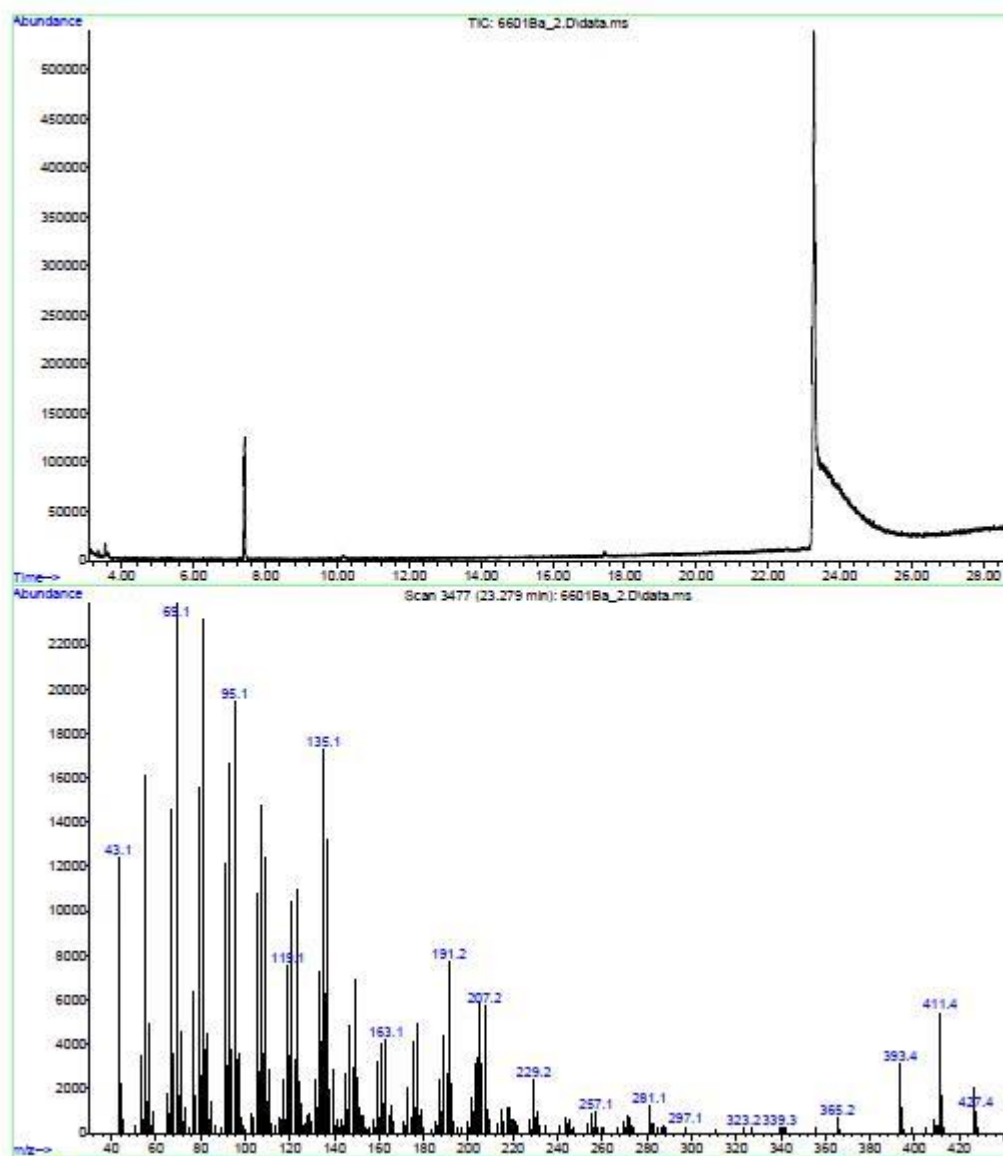

**Fig. 1** GC-MS Data for **S6**.

GC/MS system consisting of a 5977E MSD single-quadrupole mass spectrometer (EI-Mode (70 eV)) with a 7820A GC by Agilent Technologies (Agilent 190915-433UI, 30 m x 250  $\mu$ m x 0.25  $\mu$ m). Injection temperature: 300 °C, column temperature: 220-300 °C (increment 3 °C/min).

## Optimization of the Wittig-type fragmentation: Synthesis of the Ethers S8 - S21

### Compound S7

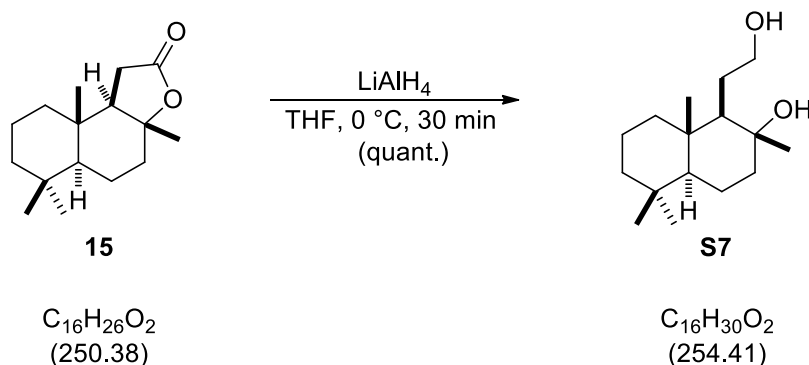

To a stirred suspension of  $\text{LiAlH}_4$  (823 mg, 21.7 mmol, 1.0 eq.) in THF (40 mL) at 0 °C was added a solution of lactone **15** (5.41 g, 21.6 mmol, 1.0 eq.) in THF (20 mL, flask rinsed with 2 x 20 mL) over 10 min. After stirring for 30 min, KOH (10 mL, 2 M aq.) was added dropwise. The mixture was diluted with  $\text{CH}_2\text{Cl}_2$ . The organic phase was separated and the aqueous phase was extracted with  $\text{CH}_2\text{Cl}_2$ . The combined organic extracts were washed with brine, dried over  $\text{MgSO}_4$ , filtered and concentrated under reduced pressure. Diol **S7** (5.49 g, 21.6 mmol, quant.) was obtained as a white solid and was used without further purification.

$R_f = 0.12$  (*n*-pentane/EtOAc 3:1).

$[\alpha]_{\text{D}}^{23} = -16.9^\circ$  ( $c = 1.05$ ,  $\text{CHCl}_3$ ).

**$^1\text{H-NMR}$**  (500 MHz,  $\text{CDCl}_3$ ):  $\delta$  [ppm] = 3.79 (dt,  $J = 10.1, 4.3$  Hz, 1H), 3.47 (ddd,  $J = 10.1, 8.2, 5.6$  Hz, 1H), 2.75 (s, 2H), 1.90 (dt,  $J = 12.4, 3.2$  Hz, 1H), 1.71 – 1.62 (m, 4H), 1.57 (tt,  $J = 13.5, 3.5$  Hz, 1H), 1.53 – 1.40 (m, 2H), 1.40 – 1.34 (m, 1H), 1.33 – 1.25 (m, 2H), 1.20 (s, 3H), 1.14 (td,  $J = 13.4, 4.2$  Hz, 1H), 0.98 – 0.92 (m, 2H), 0.87 (s, 3H), 0.79 (s, 6H).

**$^{13}\text{C-NMR}$**  (126 MHz,  $\text{CDCl}_3$ ):  $\delta$  [ppm] = 73.4, 64.3, 59.3, 56.2, 44.4, 42.1, 39.5, 39.1, 33.6, 33.4, 28.0, 24.8, 21.6, 20.6, 18.6, 15.5.

**IR** ( $\nu/\text{cm}^{-1}$ , ATR) = 3267, 2923, 2867, 1461, 1386, 1189, 1085, 1051, 935, 727.

**HRMS (ESI)**:  $m/z$  calculated for  $\text{C}_{16}\text{H}_{30}\text{O}_2\text{Na}^+$   $[\text{M}+\text{Na}]^+$ : 277.2138, found 277.2147.

**Mp** = 128 – 130 °C.

The spectral data matched previously obtained data.<sup>16</sup>

## Compound S8

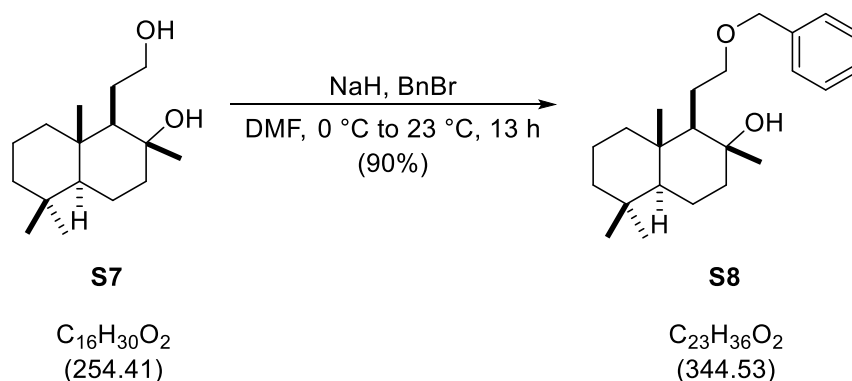

To a stirred suspension of sodium hydride (60% in mineral oil, 1.13 g, 28.3 mmol, 1.3 eq.) in DMF (30 mL) at 0 °C was added a solution of diol **S7** (5.46 g, 21.5 mmol, 1.0 eq.) in DMF (20 mL, flask rinsed with 2 x 5 mL). After 30 min benzyl bromide (3.83 mL, 5.51 g, 32.2 mmol, 1.5 eq.) was added and the mixture was allowed to warm to 23 °C over 13 h. Water and EtOAc were added to the reaction mixture sequentially. The organic phase was separated and the aqueous phase was extracted with EtOAc. The combined organic extracts were washed repeatedly with brine, dried over  $\text{MgSO}_4$ , filtered and concentrated under reduced pressure. The residue was purified by flash column chromatography ( $\text{SiO}_2$ , *n*-pentane/EtOAc 20:1 to 10:1) to afford ether **S8** (6.65 g, 19.3 mmol, 90%) as a colorless oil.

$R_f = 0.88$  (*n*-pentane/EtOAc 3:1).

$[\alpha]_{\text{D}}^{23} = -16.1^\circ$  ( $c = 0.88$ ,  $\text{CHCl}_3$ ).

**$^1\text{H-NMR}$**  (700 MHz,  $\text{CDCl}_3$ ):  $\delta$  [ppm] = 7.38 – 7.30 (m, 4H), 7.30 – 7.25 (m, 1H), 4.53 (d,  $J = 1.9$  Hz, 2H), 3.63 (ddd,  $J = 9.2, 5.4, 4.1$  Hz, 1H), 3.37 (ddd,  $J = 10.2, 8.8, 4.3$  Hz, 1H), 3.32 (s, 1H), 1.90 (dt,  $J = 12.6, 3.2$  Hz, 1H), 1.80 – 1.74 (m, 1H), 1.65 (ddd,  $J = 13.8, 6.1, 3.7$  Hz, 1H), 1.64 – 1.53 (m, 3H), 1.46 – 1.33 (m, 3H), 1.30 – 1.24 (m, 1H), 1.24 – 1.20 (m, 1H), 1.15 – 1.14 (m, 3H), 1.12 (dd,  $J = 13.5, 4.2$  Hz, 1H), 0.91 (dd,  $J = 12.3, 2.3$  Hz, 1H), 0.87 (s, 3H), 0.85 (dd,  $J = 13.0, 3.7$  Hz, 1H), 0.79 (s, 6H).

**$^{13}\text{C-NMR}$**  (176 MHz,  $\text{CDCl}_3$ ):  $\delta$  [ppm] = 138.0, 128.6 (2C), 127.8 (3C), 73.3, 72.4, 72.2, 59.4, 56.2, 44.2, 42.1, 39.6, 39.1, 33.6, 33.4, 25.4, 24.5, 21.6, 20.6, 18.6, 15.4.

**IR** ( $\text{v}/\text{cm}^{-1}$ , ATR) = 3438, 2925, 2863, 1457, 1384, 1366, 1076, 930, 910, 732.

**HRMS (ESI)**:  $m/z$  calculated for  $\text{C}_{23}\text{H}_{36}\text{O}_2\text{K}^+$   $[\text{M}+\text{K}]^+$ : 383.2347, found 383.2356.

The spectral data matched previously obtained data.<sup>17</sup>

## Compound **S9**

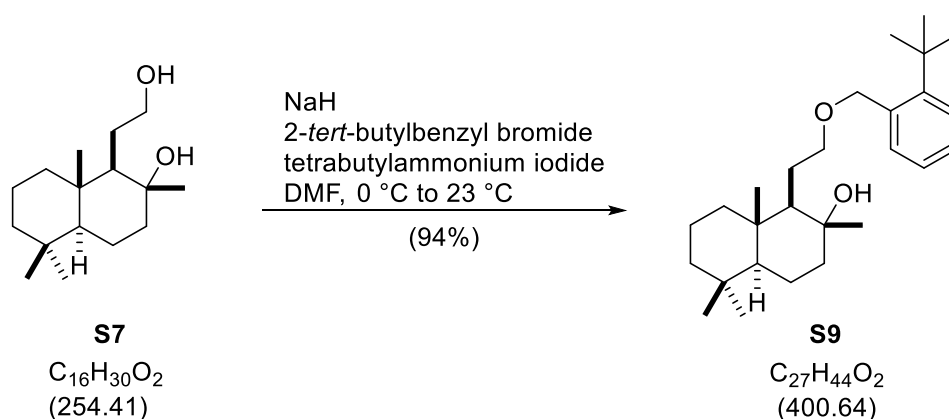

To a stirred solution of diol **S7** (256 mg, 1.01 mmol, 1.0 eq.) in DMF (4 mL) was added sodium hydride (60% in mineral oil, 60.3 mg, 1.51 mmol, 1.5 eq.) at 0 °C. After 30 min tetrabutylammonium iodide (18.6 mg, 50.3  $\mu\text{mol}$ , 0.05 eq.) and 2-*tert*-butylbenzyl bromide (341 mg, 1.51 mmol, 1.5 eq.) in DMF (2.0 mL) were added and the mixture was allowed to warm to 23 °C over 20 h. Water and EtOAc were added to the reaction mixture sequentially. The organic phase was separated and the aqueous phase was extracted with EtOAc. The combined organic extracts were washed repeatedly with brine, dried over  $\text{MgSO}_4$ , filtered and concentrated under reduced pressure. The residue was purified by flash column chromatography ( $\text{SiO}_2$ , *n*-pentane/EtOAc 1:0 to 5:1) to afford ether **S9** (381 mg, 950  $\mu\text{mol}$ , 94%) as a colorless oil.

$R_f = 0.39$  (*n*-pentane/EtOAc, 9:1).

$[\alpha]_D^{27} = -3.68$  ( $c = 1.34$ ,  $\text{CHCl}_3$ ).

**$^1\text{H}$ -NMR** (700 MHz,  $\text{CDCl}_3$ ):  $\delta$  [ppm] = 7.48 – 7.45 (m, 1H), 7.39 – 7.36 (m, 1H), 7.23 – 7.17 (m, 2H), 4.83 – 4.68 (m, 2H), 3.70 – 3.65 (m, 1H), 3.46 – 3.40 (m, 1H), 3.19 (*s<sub>br</sub>*, 1H), 1.89 (dt,  $J = 12.6, 3.3$  Hz, 1H), 1.82 – 1.76 (m, 1H), 1.67 – 1.56 (m, 4H), 1.43 – 1.40 (m, 10H), 1.39 – 1.36 (m, 1H), 1.29 – 1.22 (m, 2H), 1.18 – 1.15 (m, 1H), 1.14 (s, 3H), 0.94 – 0.90 (m, 2H), 0.88 (s, 3H), 0.83 – 0.80 (m, 1H), 0.80 (s, 6H).

**$^{13}\text{C}$ -NMR** (176 MHz,  $\text{CDCl}_3$ ):  $\delta$  [ppm] = 147.9, 136.3, 131.1, 127.7, 126.3, 126.2, 72.5, 72.5, 71.9, 59.4, 56.3, 44.3, 42.1, 39.7, 39.2, 35.9, 33.6, 33.4, 32.0 (3C), 25.5, 24.5, 21.7, 20.6, 18.6, 15.4.

**IR** ( $\nu/\text{cm}^{-1}$ , ATR) = 3453, 2932, 2867, 1463, 1386, 1363, 1248, 1188, 1074, 934.

**HRMS (ESI)**:  $m/z$  calculated for  $\text{C}_{27}\text{H}_{44}\text{O}_2\text{Na}^+$   $[\text{M}+\text{Na}]^+$ : 423.3233, found 423.3240.

## Compound **S10**

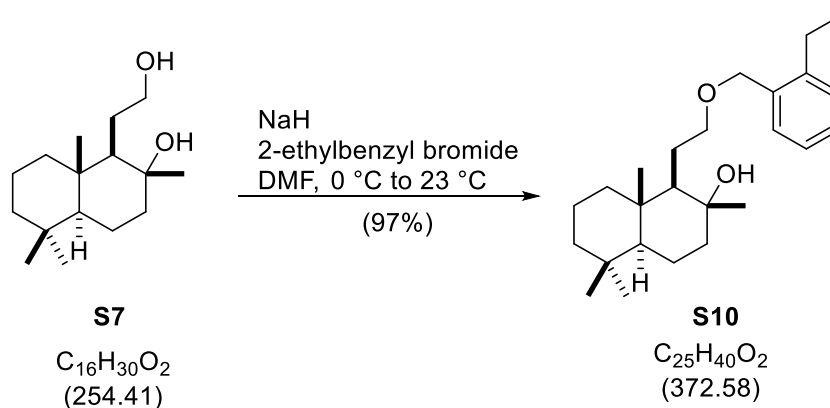

To a stirred suspension of sodium hydride (60% in mineral oil, 62.9 mg, 1.57 mmol, 2.0 eq.) in DMF (3 mL) at 0 °C was added a solution of diol **S7** (200 mg, 786  $\mu$ mol, 1.0 eq.) in DMF (3 mL). After 30 min 2-ethylbenzyl bromide (221 mg, 1.11 mmol, 1.4 eq.) in DMF (3 mL) was added and the mixture was allowed to warm to 23 °C over 13 h. Water and EtOAc were added to the reaction mixture sequentially. The organic phase was separated and the aqueous phase was extracted with EtOAc. The combined organic extracts were washed repeatedly with brine, dried over  $MgSO_4$ , filtered and concentrated under reduced pressure. The residue was purified by flash column chromatography ( $SiO_2$ , *n*-pentane/EtOAc 20:1 to 5:1) to afford ether **S10** (283 mg, 759  $\mu$ mol, 97%) as a slightly yellow oil.

$R_f$  = 0.61 (*n*-pentane/EtOAc, 6:1).

$[\alpha]_D^{27} = -16.1$  ( $c$  = 0.62,  $CHCl_3$ ).

**$^1H$ -NMR** (500 MHz,  $CDCl_3$ ):  $\delta$  [ppm] = 7.31 (d,  $J$  = 7.5 Hz, 1H), 7.25 – 7.14 (m, 3H), 4.65 – 4.48 (m, 2H), 3.66 – 3.60 (m, 1H), 3.38 (td,  $J$  = 9.3, 4.5 Hz, 1H), 3.20 ( $s_{br}$ , 1H), 2.69 (q,  $J$  = 7.6 Hz, 2H), 1.89 (dt,  $J$  = 12.5, 3.3 Hz, 1H), 1.81 – 1.72 (m, 1H), 1.69 – 1.53 (m, 4H), 1.45 – 1.34 (m, 3H), 1.28 – 1.20 (m, 5H), 1.17 – 1.10 (m, 4H), 0.94 – 0.89 (m, 1H), 0.89 – 0.85 (m, 4H), 0.79 (s, 6H).

**$^{13}C$ -NMR** (126 MHz,  $CDCl_3$ ):  $\delta$  [ppm] = 142.7, 135.3, 129.1, 128.6, 128.2, 125.9, 72.5, 72.2, 71.2, 59.4, 56.3, 44.2, 42.1, 39.7, 39.2, 33.6, 33.4, 25.5, 25.4, 24.5, 21.6, 20.6, 18.6, 15.4, 15.4.

**IR** ( $\nu/cm^{-1}$ , ATR) = 3439, 2930, 2867, 1458, 1384, 1183, 1086, 935, 843, 756.

**HRMS (ESI)**:  $m/z$  calculated for  $C_{25}H_{40}O_2Na^+$   $[M+Na]^+$ : 395.2921, found 395.2938.

## Compound **S11**

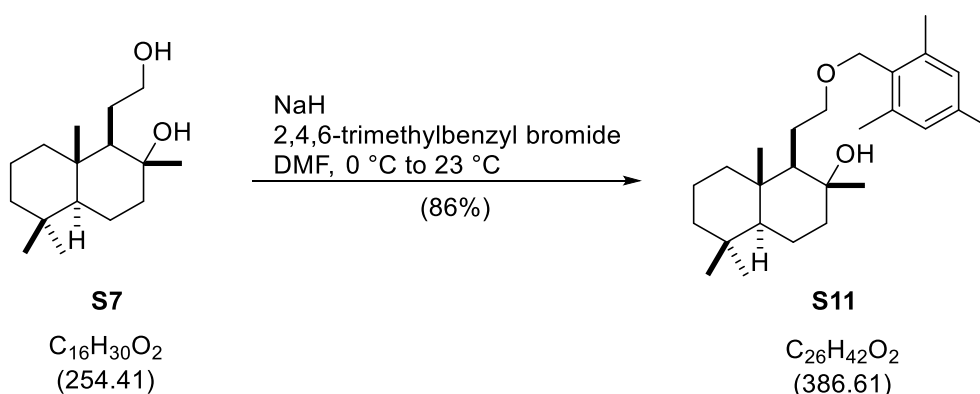

To a stirred suspension of sodium hydride (60% in mineral oil, 299 mg, 7.48 mmol, 2.0 eq.) in DMF (7 mL) at 0 °C was added a solution of diol **S7** (951 mg, 3.74 mmol, 1.0 eq.) in DMF (7 mL). After 30 min 2,4,6-trimethylbenzyl bromide (1.19 g, 5.61 mmol, 1.5 eq.) in DMF (6 mL) was added and the mixture was allowed to warm to 23 °C over 22 h. Water and EtOAc were added to the reaction mixture sequentially. The organic phase was separated and the aqueous phase was extracted with EtOAc. The combined organic extracts were washed repeatedly with brine, dried over  $MgSO_4$ , filtered and concentrated under reduced pressure. The residue was purified by flash column chromatography ( $SiO_2$ , *n*-pentane/EtOAc 30:1 to 10:1) to afford ether **S11** (1.24 g, 3.20 mmol, 86%) as a slightly yellow oil.

$R_f = 0.56$  (*n*-pentane/EtOAc, 6:1).

$[\alpha]_D^{27} = -14.9$  ( $c = 3.98$ ,  $CHCl_3$ ).

**$^1H$ -NMR** (500 MHz,  $CDCl_3$ ):  $\delta$  [ppm] = 6.83 (s, 2H), 4.53 (s, 2H), 3.69 – 3.56 (m, 1H), 3.47 – 3.15 (m, 2H), 2.36 (s, 6H), 2.25 (s, 3H), 1.88 (dt,  $J = 12.5, 3.2$  Hz, 1H), 1.76 – 1.53 (m, 5H), 1.45 – 1.35 (m, 3H), 1.29 – 1.18 (m, 2H), 1.18 – 1.13 (m, 1H), 1.10 (s, 3H), 0.92 (d,  $J = 2.3$  Hz, 1H), 0.89 – 0.85 (m, 4H), 0.79 (s, 3H), 0.78 (s, 3H).

**$^{13}C$ -NMR** (126 MHz,  $CDCl_3$ ):  $\delta$  [ppm] = 137.8 (2C), 137.6, 131.0, 129.1 (2C), 72.2, 71.8, 67.2, 59.5, 56.3, 44.2, 42.1, 39.7, 39.1, 33.6, 33.4, 25.6, 24.6, 21.6, 21.1, 20.6, 19.8 (2C), 18.6, 15.4.

**IR** ( $\nu/cm^{-1}$ , ATR) = 3439, 2925, 2864, 1613, 1459, 1383, 1235, 1079, 935, 849.

**HRMS (ESI)**:  $m/z$  calculated for  $C_{26}H_{42}O_2Na^+$   $[M+Na]^+$ : 409.3077, found 409.3097.

## Compound **S12**

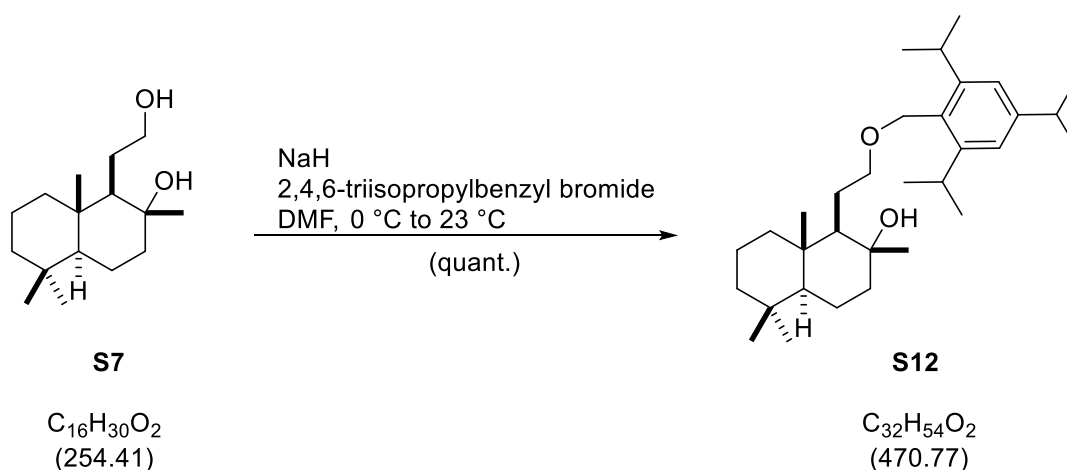

To a stirred suspension of sodium hydride (60% in mineral oil, 281 mg, 7.02 mmol, 2.0 eq.) in DMF (7 mL) at 0 °C was added a solution of diol **S7** (893 mg, 3.51 mmol, 1.0 eq.) in DMF (7 mL). After 30 min 2,4,6-triisopropylbenzyl bromide (1.50 g, 5.05 mmol, 1.4 eq.) in DMF (6 mL) was added and the mixture was allowed to warm to 23 °C over 12 h. Water and EtOAc were added to the reaction mixture sequentially. The organic phase was separated and the aqueous phase was extracted with EtOAc. The combined organic extracts were washed repeatedly with brine, dried over  $\text{MgSO}_4$ , filtered and concentrated under reduced pressure. The residue was purified by flash column chromatography ( $\text{SiO}_2$ , *n*-pentane/EtOAc 20:1 to 10:1) to afford ether **S12** (1.69 g, 3.60 mmol, quant.) as a slightly yellow oil.

$R_f = 0.35$  (*n*-pentane/EtOAc, 19:1).

$[\alpha]_D^{27} = -20.9$  ( $c = 1.97$ ,  $\text{CHCl}_3$ ).

**$^1\text{H}$ -NMR** (500 MHz,  $\text{CDCl}_3$ ):  $\delta$  [ppm] = 7.00 (s, 2H), 4.60 – 4.50 (m, 2H), 3.71 – 3.64 (m, 1H), 3.46 – 3.39 (m, 1H), 3.28 (hept,  $J = 6.8$  Hz, 2H), 3.06 ( $s_{br}$ , 1H), 2.87 (hept,  $J = 6.9$  Hz, 1H), 1.86 (dt,  $J = 12.4, 3.1$  Hz, 1H), 1.80 – 1.70 (m, 1H), 1.69 – 1.57 (m, 4H), 1.47 – 1.33 (m, 4H), 1.29 – 1.23 (m, 19H), 1.19 – 1.13 (m, 1H), 1.10 (s, 3H), 0.97 – 0.90 (m, 2H), 0.89 (s, 3H), 0.80 (s, 6H).

**$^{13}\text{C}$ -NMR** (126 MHz,  $\text{CDCl}_3$ ):  $\delta$  [ppm] = 148.8, 148.5 (2C), 128.7, 121.0 (2C), 72.3, 72.1, 65.5, 59.1, 56.4, 44.3, 42.2, 39.8, 39.2, 34.5, 33.6, 33.4, 29.5 (2C), 25.6, 24.7, 24.6 (2C), 24.5 (2C), 24.1 (2C), 21.6, 20.6, 18.6, 15.4.

**IR** ( $\nu/\text{cm}^{-1}$ , ATR) = 3443, 2957, 2929, 2868, 1607, 1460, 1384, 1074, 877, 753.

**HRMS (ESI)**:  $m/z$  calculated for  $\text{C}_{32}\text{H}_{54}\text{O}_2\text{Na}^+$   $[\text{M}+\text{Na}]^+$ : 493.4016, found 493.4041.

## Compound **S13**

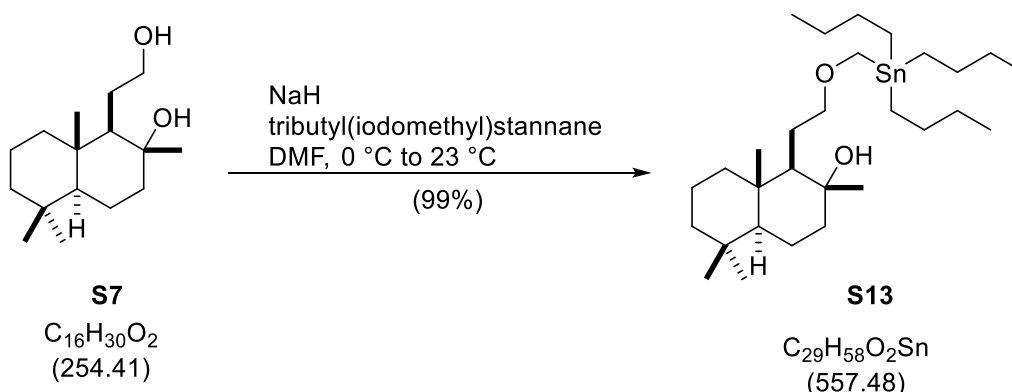

To a stirred suspension of sodium hydride (60% in mineral oil, 191 mg, 4.77 mmol, 2.0 eq.) in DMF (5 mL) at 0 °C was added a solution of diol **S7** (607 mg, 2.38 mmol, 1.0 eq.) in DMF (5 mL). After 30 min tributyl(iodomethyl)stannane (5.52 g, 3.46 mmol, 1.5 eq.) in DMF (5 mL) was added and the mixture was allowed to warm to 23 °C over 24 h. Water and EtOAc were added to the reaction mixture sequentially. The organic phase was separated and the aqueous phase was extracted with EtOAc. The combined organic extracts were washed repeatedly with brine, dried over  $\text{MgSO}_4$ , filtered and concentrated under reduced pressure. The residue was purified by flash column chromatography ( $\text{SiO}_2$ , *n*-pentane/EtOAc 1:0 to 10:1) to afford ether **S13** (1.32 g, 2.37 mmol, 99%) as a slightly yellow oil.

$R_f = 0.61$  (*n*-pentane/EtOAc, 19:1).

$[\alpha]_{\text{D}}^{27} = -16.8$  ( $c = 1.88$ ,  $\text{CHCl}_3$ ).

**$^1\text{H}$ -NMR** (500 MHz,  $\text{CDCl}_3$ ):  $\delta$  [ppm] = 3.78 – 3.67 (m, 2H), 3.62 (*s<sub>br</sub>*, 1H), 3.49 (dt,  $J = 8.6$ , 4.2 Hz, 1H), 3.24 – 3.16 (m, 1H), 1.89 (dt,  $J = 12.6$ , 3.2 Hz, 1H), 1.74 – 1.59 (m, 4H), 1.59 – 1.45 (m, 8H), 1.45 – 1.34 (m, 4H), 1.34 – 1.27 (m, 6H), 1.27 – 1.21 (m, 2H), 1.15 (dd,  $J = 13.4$ , 4.0 Hz, 1H), 1.12 (s, 3H), 0.93 – 0.86 (m, 18H), 0.79 (s, 3H), 0.78 (s, 3H).

**$^{13}\text{C}$ -NMR** (126 MHz,  $\text{CDCl}_3$ ):  $\delta$  [ppm] = 77.5, 72.0, 62.4, 59.6, 56.3, 44.1, 42.1, 39.8, 39.1, 33.6, 33.4, 29.3 (3C), 27.5 (3C), 25.4, 24.6, 21.7, 20.6, 18.7, 15.4, 13.9 (3C), 9.1 (3C).

**IR** ( $\text{v}/\text{cm}^{-1}$ , ATR) = 3437, 2951, 2923, 2849, 1460, 1381, 1339, 1287, 1073, 934.

**HRMS (ESI)**:  $m/z$  calculated for  $\text{C}_{29}\text{H}_{58}\text{O}_2\text{SnNa}^+$   $[\text{M}+\text{Na}]^+$ : 581.3351, found 581.3339.

## Compound **S14**

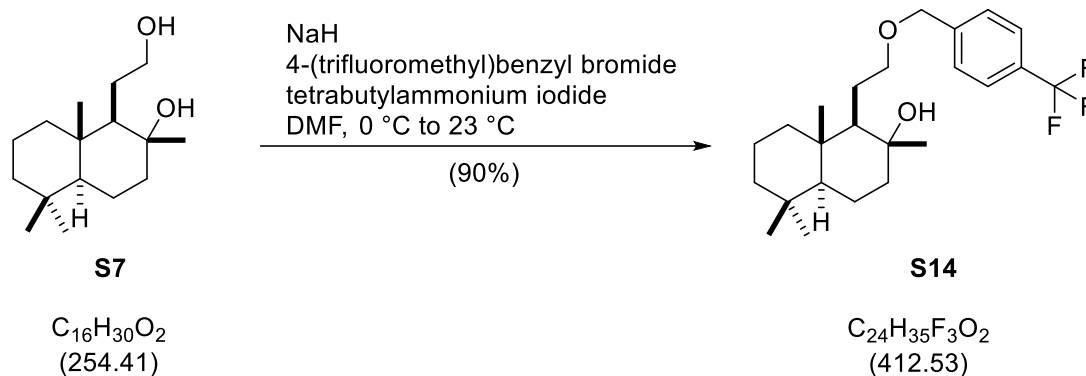

To a stirred solution of diol **S7** (132 mg, 518  $\mu\text{mol}$ , 1.0 eq.) in DMF (2.5 mL) was added sodium hydride (60% in mineral oil, 26.9 mg, 673  $\mu\text{mol}$ , 1.3 eq.) at 0 °C. After 30 min tetrabutylammonium iodide (9.6 mg, 26  $\mu\text{mol}$ , 0.05 eq.) and 4-(trifluoromethyl)benzyl bromide (173 mg, 725  $\mu\text{mol}$ , 1.4 eq.) in DMF (0.5 mL) were added and the mixture was allowed to warm to 23 °C over 22 h. Water and EtOAc were added to the reaction mixture sequentially. The organic phase was separated and the aqueous phase was extracted with EtOAc. The combined organic extracts were washed repeatedly with brine, dried over  $\text{MgSO}_4$ , filtered and concentrated under reduced pressure. The residue was purified by flash column chromatography ( $\text{SiO}_2$ , *n*-pentane/EtOAc 1:0 to 5:1) to afford ether **S14** (192 mg, 466  $\mu\text{mol}$ , 90%) as a colorless oil.

$R_f = 0.40$  (*n*-pentane/EtOAc, 5:1).

$[\alpha]_{\text{D}}^{26} = -18.3$  ( $c = 0.85$ ,  $\text{CHCl}_3$ ).

**$^1\text{H}$ -NMR** (700 MHz,  $\text{CDCl}_3$ ):  $\delta$  [ppm] = 7.60 (d,  $J = 8.0$  Hz, 2H), 7.44 (d,  $J = 8.0$  Hz, 2H), 4.58 (s, 2H), 3.68 – 3.61 (m, 1H), 3.45 – 3.39 (m, 1H), 2.99 (*s<sub>br</sub>*, 1H), 1.90 (dt,  $J = 12.6, 3.2$  Hz, 1H), 1.80 (ddt,  $J = 15.2, 10.2, 5.3$  Hz, 1H), 1.69 – 1.54 (m, 4H), 1.45 – 1.35 (m, 3H), 1.29 – 1.22 (m, 1H), 1.21 (t,  $J = 4.3$  Hz, 1H), 1.17 – 1.14 (m, 3H), 1.12 (dd,  $J = 13.5, 4.2$  Hz, 1H), 0.91 (dd,  $J = 12.2, 2.3$  Hz, 1H), 0.90 – 0.84 (m, 4H), 0.79 (s, 3H), 0.79 (s, 3H).

**$^{13}\text{C}$ -NMR** (176 MHz,  $\text{CDCl}_3$ ):  $\delta$  [ppm] = 142.2, 130.0 (q,  $J = 32.4$  Hz), 127.8 (2C), 125.6 (q,  $J = 3.7$  Hz, 2C), 125.1 (q,  $J = 272.2$  Hz), 72.8, 72.7, 72.5, 59.4, 56.3, 44.3, 42.1, 39.7, 39.2, 33.5, 33.4, 25.4, 24.5, 21.6, 20.6, 18.6, 15.4.

**$^{19}\text{F}$ -NMR** (471 MHz,  $\text{CDCl}_3$ ):  $\delta$  [ppm] =  $-62.4$ .

**IR** ( $\text{v}/\text{cm}^{-1}$ , ATR) = 3455, 2930, 2865, 1622, 1462, 1387, 1325, 1164, 1125, 1070.

**HRMS (ESI)**:  $m/z$  calculated for  $\text{C}_{24}\text{H}_{35}\text{F}_3\text{O}_2\text{Na}^+$   $[\text{M}+\text{Na}]^+$ : 435.2481, found 435.2490.

## Compound **S15**

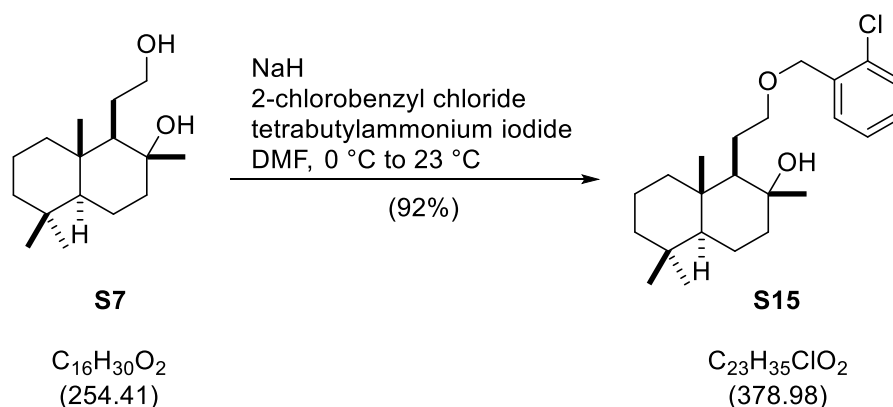

To a stirred solution of diol **S7** (301 mg, 1.18 mmol, 1.0 eq.) in DMF (4.0 mL) was added sodium hydride (60% in mineral oil, 70.8 mg, 1.77 mmol, 1.5 eq.) at 0 °C. After 30 min tetrabutylammonium iodide (43.7 mg, 118  $\mu\text{mol}$ , 0.1 eq.) and 2-chlorobenzyl chloride (268  $\mu\text{L}$ , 286 mg, 1.77 mmol, 1.5 eq.) were added and the mixture was allowed to warm to 23 °C over 2 h. Water and EtOAc were added to the reaction mixture sequentially. The organic phase was separated and the aqueous phase was extracted with EtOAc. The combined organic extracts were washed repeatedly with brine, dried over  $\text{MgSO}_4$ , filtered and concentrated under reduced pressure. The residue was purified by flash column chromatography ( $\text{SiO}_2$ , *n*-pentane/EtOAc 1:0 to 5:1) to afford ether **S15** (413 mg, 1.09 mmol, 92%) as a colorless oil.

$R_f = 0.52$  (*n*-pentane/EtOAc, 5:1).

$[\alpha]_{\text{D}}^{27} = -20.6$  ( $c = 1.03$ ,  $\text{CHCl}_3$ ).

**$^1\text{H-NMR}$**  (700 MHz,  $\text{CDCl}_3$ ):  $\delta$  [ppm] = 7.44 (dd,  $J = 7.6, 1.6$  Hz, 1H), 7.35 – 7.32 (m, 1H), 7.27 – 7.24 (m, 1H), 7.20 (td,  $J = 7.6, 1.7$  Hz, 1H), 4.62 (s, 2H), 3.75 – 3.61 (m, 1H), 3.50 – 3.37 (m, 1H), 3.05 (*s<sub>br</sub>*, 1H), 1.90 (dt,  $J = 12.6, 3.3$  Hz, 1H), 1.80 (ddt,  $J = 15.2, 10.2, 5.2$  Hz, 1H), 1.67 – 1.54 (m, 4H), 1.45 – 1.34 (m, 3H), 1.29 – 1.21 (m, 2H), 1.14 (s, 3H), 1.12 (dd,  $J = 13.6, 4.1$  Hz, 1H), 0.91 (dd,  $J = 12.2, 2.3$  Hz, 1H), 0.90 – 0.84 (m, 4H), 0.79 (s, 3H), 0.79 (s, 3H).

**$^{13}\text{C-NMR}$**  (176 MHz,  $\text{CDCl}_3$ ):  $\delta$  [ppm] = 135.8, 133.0, 129.4, 129.1, 128.8, 127.0, 72.7, 72.6, 70.3, 59.2, 56.2, 44.2, 42.0, 39.7, 39.1, 33.5, 33.4, 25.4, 24.4, 21.6, 20.6, 18.5, 15.4.

**IR** ( $\nu/\text{cm}^{-1}$ , ATR) = 3448, 2929, 2865, 1446, 1385, 1363, 1102, 1047, 935, 753.

**HRMS (ESI)**:  $m/z$  calculated for  $\text{C}_{23}\text{H}_{35}\text{ClO}_2\text{Na}^+$   $[\text{M}+\text{Na}]^+$ : 401.2218, found 401.2230.

## Compound **S16**

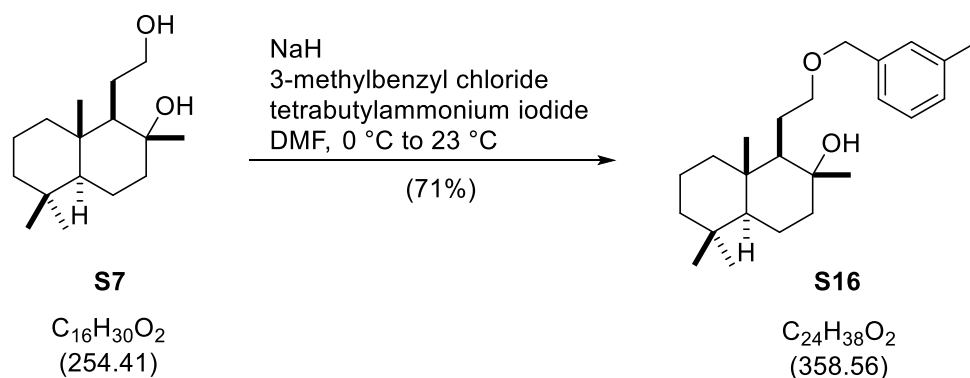

To a stirred solution of diol **S7** (301 mg, 1.18 mmol, 1.0 eq.) in DMF (4.0 mL) was added sodium hydride (60% in mineral oil, 70.9 mg, 1.77 mmol, 1.5 eq.) at 0 °C. After 30 min tetrabutylammonium iodide (43.7 mg, 118  $\mu$ mol, 0.1 eq.) and 3-methylbenzyl chloride (268  $\mu$ L, 286 mg, 1.77 mmol, 1.5 eq.) were added and the mixture was allowed to warm to 23 °C over 2 d. Water and EtOAc were added to the reaction mixture sequentially. The organic phase was separated and the aqueous phase was extracted with EtOAc. The combined organic extracts were washed repeatedly with brine, dried over  $MgSO_4$ , filtered and concentrated under reduced pressure. The residue was purified by flash column chromatography ( $SiO_2$ , *n*-pentane/EtOAc 1:0 to 5:1) to afford ether **S16** (317 mg, 837  $\mu$ mol, 71%) as a colorless oil.

$R_f$  = 0.61 (*n*-pentane/EtOAc, 5:1).

$[\alpha]_D^{27} = -17.7$  ( $c$  = 1.36,  $CHCl_3$ ).

**$^1H$ -NMR** (700 MHz,  $CDCl_3$ ):  $\delta$  [ppm] = 7.23 (t,  $J$  = 7.6 Hz, 1H), 7.14 (s, 1H), 7.12 (d,  $J$  = 7.6 Hz, 1H), 7.09 (d,  $J$  = 7.6 Hz, 1H), 4.49 (s, 2H), 3.66 – 3.59 (m, 1H), 3.38 – 3.32 (m, 1H), 3.30 (*sbr*, 1H), 2.35 (s, 3H), 1.90 (dt,  $J$  = 12.6, 3.3 Hz, 1H), 1.80 – 1.73 (m, 1H), 1.67 – 1.62 (m, 1H), 1.62 – 1.54 (m, 3H), 1.45 – 1.35 (m, 3H), 1.26 (ddd,  $J$  = 13.7, 12.2, 3.1 Hz, 1H), 1.23 (s, 1H), 1.17 – 1.13 (m, 3H), 1.11 (dd,  $J$  = 13.2, 4.1 Hz, 1H), 0.90 (dd,  $J$  = 12.3, 2.3 Hz, 1H), 0.87 (s, 3H), 0.86 – 0.81 (m, 1H), 0.79 (s, 3H), 0.78 (s, 3H).

**$^{13}C$ -NMR** (176 MHz,  $CDCl_3$ ):  $\delta$  [ppm] = 138.1, 138.0, 128.7, 128.6, 128.5, 125.1, 73.3, 72.4, 72.0, 59.3, 56.3, 44.2, 42.1, 39.6, 39.1, 33.6, 33.4, 25.4, 24.5, 21.6, 21.6, 20.6, 18.6, 15.4.

**IR** ( $\nu/cm^{-1}$ , ATR) = 3444, 2925, 2862, 1610, 1460, 1384, 1246, 1156, 1081, 934.

**HRMS (ESI)**:  $m/z$  calculated for  $C_{24}H_{38}O_2Na^+$   $[M+Na]^+$ : 381.2764, found 381.2780.

## Compound **S17**

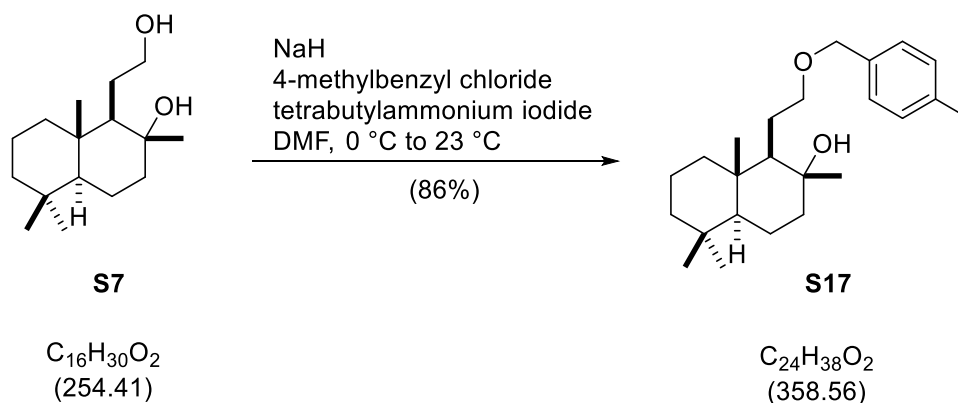

To a stirred solution of diol **S7** (301 mg, 1.18 mmol, 1.0 eq.) in DMF (4.0 mL) was added sodium hydride (60% in mineral oil, 70.9 mg, 1.77 mmol, 1.5 eq.) at 0 °C. After 30 min tetrabutylammonium iodide (43.7 mg, 118  $\mu$ mol, 0.1 eq.) and 4-methylbenzyl chloride (269  $\mu$ L, 286 mg, 1.77 mmol, 1.5 eq.) were added and the mixture was allowed to warm to 23 °C over 2 h. Water and EtOAc were added to the reaction mixture sequentially. The organic phase was separated and the aqueous phase was extracted with EtOAc. The combined organic extracts were washed repeatedly with brine, dried over  $MgSO_4$ , filtered and concentrated under reduced pressure. The residue was purified by flash column chromatography ( $SiO_2$ , *n*-pentane/EtOAc 1:0 to 5:1) to afford ether **S17** (387 mg, 1.02 mmol, 86%) as a colorless oil.

$R_f$  = 0.50 (*n*-pentane/EtOAc, 5:1).

$[\alpha]_D^{27} = -20.4$  ( $c = 1.43$ ,  $CHCl_3$ ).

**$^1H$ -NMR** (700 MHz,  $CDCl_3$ ):  $\delta$  [ppm] = 7.21 (d,  $J = 7.7$  Hz, 2H), 7.15 (d,  $J = 7.7$  Hz, 2H), 4.48 (s, 2H), 3.65 – 3.59 (m, 1H), 3.52 – 3.15 (m, 2H), 2.33 (s, 3H), 1.90 (dt,  $J = 12.7, 3.3$  Hz, 1H), 1.79 – 1.72 (m, 1H), 1.68 – 1.62 (m, 1H), 1.62 – 1.53 (m, 3H), 1.45 – 1.34 (m, 3H), 1.28 – 1.19 (m, 2H), 1.14 (s, 3H), 1.11 (dd,  $J = 13.4, 4.2$  Hz, 1H), 0.90 (dd,  $J = 12.4, 2.3$  Hz, 1H), 0.87 (s, 3H), 0.86 – 0.81 (m, 1H), 0.79 (s, 3H), 0.78 (s, 3H).

**$^{13}C$ -NMR** (176 MHz,  $CDCl_3$ ):  $\delta$  [ppm] = 137.5, 135.0, 129.2 (2C), 128.0 (2C), 73.2, 72.4, 72.0, 59.4, 56.2, 44.2, 42.1, 39.6, 39.2, 33.6, 33.4, 25.4, 24.6, 21.6, 21.3, 20.6, 18.6, 15.4.

**IR** ( $\nu/cm^{-1}$ , ATR) = 3443, 2925, 2861, 1515, 1459, 1384, 1241, 1089, 934, 802.

**HRMS (ESI)**:  $m/z$  calculated for  $C_{24}H_{38}O_2Na^+$   $[M+Na]^+$ : 381.2764, found 381.2767.

## Compound **S18**

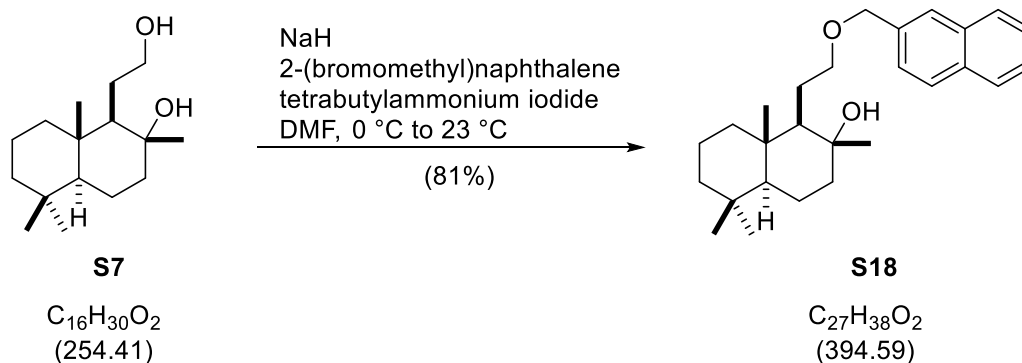

To a stirred solution of diol **S7** (300 mg, 1.18 mmol, 1.0 eq.) in DMF (4.0 mL) was added sodium hydride (60% in mineral oil, 70.9 mg, 1.77 mmol, 1.5 eq.) at 0 °C. After 30 min tetrabutylammonium iodide (21.8 mg, 59.0  $\mu\text{mol}$ , 0.05 eq.) and 2-(bromomethyl)naphthalene (391 mg, 1.77 mmol, 1.5 eq.) in DMF (0.5 mL) were added and the mixture was allowed to warm to 23 °C over 16 h. Water and EtOAc were added to the reaction mixture sequentially. The organic phase was separated and the aqueous phase was extracted with EtOAc. The combined organic extracts were washed repeatedly with brine, dried over  $\text{MgSO}_4$ , filtered and concentrated under reduced pressure. The residue was purified by flash column chromatography ( $\text{SiO}_2$ , *n*-pentane/EtOAc 1:0 to 5:1) to afford ether **S18** (375 mg, 950  $\mu\text{mol}$ , 81%) as a colorless oil.

$R_f = 0.41$  (*n*-pentane/EtOAc, 5:1).

$[\alpha]_{\text{D}}^{27} = -15.4$  ( $c = 1.36$ ,  $\text{CHCl}_3$ ).

**$^1\text{H-NMR}$**  (700 MHz,  $\text{CDCl}_3$ ):  $\delta$  [ppm] = 7.85 – 7.81 (m, 3H), 7.77 (s, 1H), 7.51 – 7.43 (m, 3H), 4.74 – 4.66 (m, 2H), 3.69 – 3.64 (m, 1H), 3.44 – 3.38 (m, 1H), 3.30 (*s<sub>br</sub>*, 1H), 1.91 (dt,  $J = 12.6$ , 3.3 Hz, 1H), 1.84 – 1.76 (m, 1H), 1.67 – 1.52 (m, 4H), 1.42 (td,  $J = 13.2$ , 4.1 Hz, 1H), 1.39 – 1.31 (m, 2H), 1.28 – 1.23 (m, 1H), 1.21 (t,  $J = 4.2$  Hz, 1H), 1.15 (s, 3H), 1.09 – 1.03 (m, 1H), 0.88 – 0.86 (m, 1H), 0.85 (s, 3H), 0.83 – 0.79 (m, 1H), 0.79 (s, 3H), 0.78 (s, 3H).

**$^{13}\text{C-NMR}$**  (176 MHz,  $\text{CDCl}_3$ ):  $\delta$  [ppm] = 135.5, 133.4, 133.2, 128.4, 128.0, 127.8, 126.8, 126.2, 126.0 (2C), 73.4, 72.5, 72.1, 59.3, 56.2, 44.2, 42.0, 39.6, 39.1, 33.5, 33.4, 25.4, 24.5, 21.6, 20.6, 18.5, 15.4.

**IR** ( $\text{v}/\text{cm}^{-1}$ , ATR) = 3444, 3054, 2927, 2862, 1602, 1508, 1461, 1162, 1092, 934.

**HRMS (ESI)**:  $m/z$  calculated for  $\text{C}_{27}\text{H}_{38}\text{O}_2\text{Na}^+$   $[\text{M}+\text{Na}]^+$ : 417.2764, found 417.2776.

## Compound **S19**

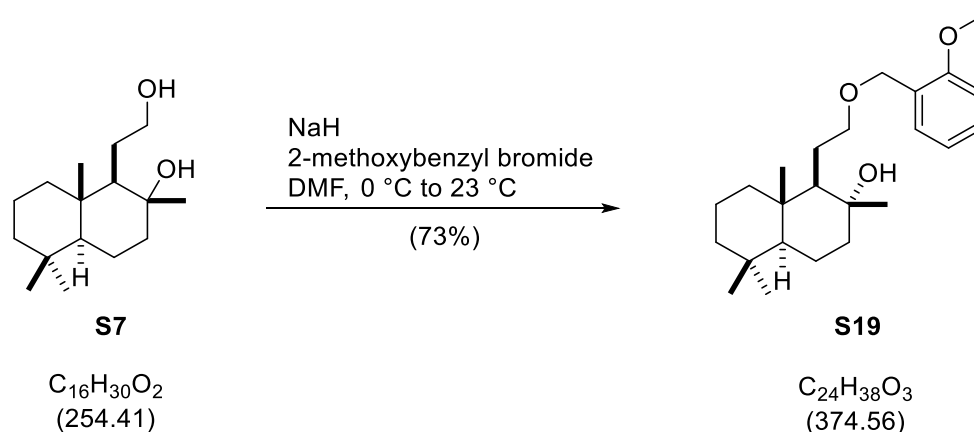

To a stirred solution of diol **S7** (105 mg, 413  $\mu\text{mol}$ , 1.0 eq.) in DMF (2.0 mL) was added sodium hydride (60% in mineral oil, 26.1 mg, 652  $\mu\text{mol}$ , 1.6 eq.) at 0 °C. After 30 min 2-methoxybenzyl bromide (151 mg, 731  $\mu\text{mol}$ , 1.8 eq.) in DMF (1.0 mL) was added and the mixture was allowed to warm to 23 °C over 20 h. Water and EtOAc were added to the reaction mixture sequentially. The organic phase was separated and the aqueous phase was extracted with EtOAc. The combined organic extracts were washed repeatedly with brine, dried over  $\text{MgSO}_4$ , filtered and concentrated under reduced pressure. The residue was purified by flash column chromatography ( $\text{SiO}_2$ , *n*-pentane/EtOAc 30:1 to 1:1) to afford ether **S19** (112 mg, 300  $\mu\text{mol}$ , 73%) as a colorless oil.

$R_f = 0.24$  (*n*-pentane/EtOAc, 10:1).

$[\alpha]_{\text{D}}^{24} = -8.14$  ( $c = 0.55$ ,  $\text{CHCl}_3$ ).

**$^1\text{H-NMR}$**  (500 MHz,  $\text{CDCl}_3$ ):  $\delta$  [ppm] = 7.33 (dd,  $J = 7.4, 1.7$  Hz, 1H), 7.28 – 7.22 (m, 1H), 6.95 (td,  $J = 7.5, 1.1$  Hz, 1H), 6.86 (d,  $J = 8.2$  Hz, 1H), 4.56 (q,  $J = 12.4$  Hz, 2H), 3.83 (s, 3H), 3.72 – 3.63 (m, 1H), 3.43 – 3.34 (m, 1H), 3.09 (*s<sub>br</sub>*, 1H), 1.90 (dt,  $J = 12.5, 3.2$  Hz, 1H), 1.82 – 1.70 (m, 1H), 1.66 – 1.52 (m, 4H), 1.44 – 1.32 (m, 3H), 1.29 – 1.22 (m, 1H), 1.20 (t,  $J = 4.3$  Hz, 1H), 1.13 (s, 3H), 1.12 – 1.07 (m, 1H), 0.90 – 0.81 (m, 5H), 0.78 (s, 6H).

**$^{13}\text{C-NMR}$**  (126 MHz,  $\text{CDCl}_3$ ):  $\delta$  [ppm] = 157.2, 129.2, 128.8, 126.5, 120.6, 110.3, 72.3, 72.2, 68.2, 59.3, 56.2, 55.4, 44.2, 42.1, 39.6, 39.1, 33.6, 33.4, 25.4, 24.4, 21.6, 20.6, 18.6, 15.4.

**IR** ( $\nu/\text{cm}^{-1}$ , ATR) = 3378, 2918, 2851, 1599, 1463, 1374, 1241, 1086, 970, 754.

**HRMS (ESI)**:  $m/z$  calculated for  $\text{C}_{24}\text{H}_{38}\text{O}_3\text{Na}^+$   $[\text{M}+\text{Na}]^+$ : 397.2713, found 397.2713.

## Compound **S20**

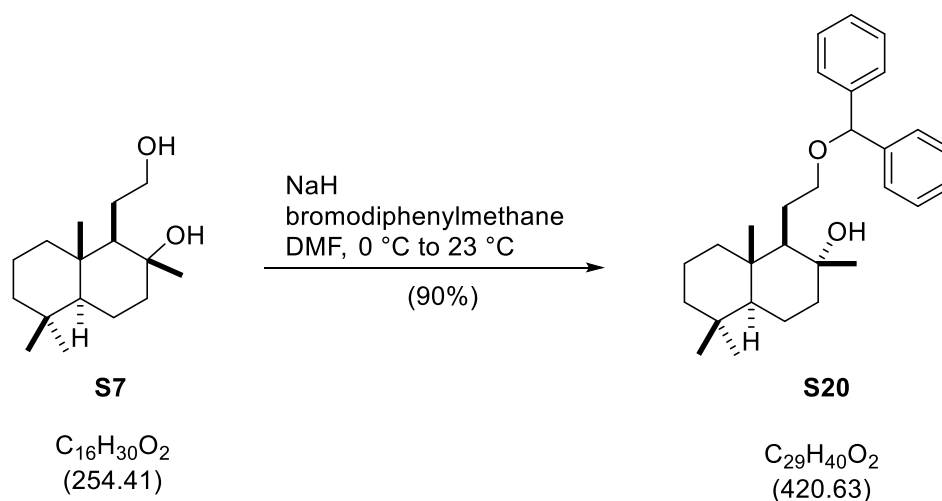

To a stirred solution of diol **S7** (515 mg, 2.02 mmol, 1.0 eq.) in DMF (10 mL) was added sodium hydride (60% in mineral oil, 123 mg, 3.03 mmol, 1.5 eq.) at 0 °C. After 30 min bromodiphenylmethane (1.03 g, 4.05 mmol, 2.0 eq.) was added and the mixture was allowed to warm to 23 °C over 20 h. Water and EtOAc were added to the reaction mixture sequentially. The organic phase was separated and the aqueous phase was extracted with EtOAc. The combined organic extracts were washed repeatedly with brine, dried over  $\text{MgSO}_4$ , filtered and concentrated under reduced pressure. The residue was purified by flash column chromatography ( $\text{SiO}_2$ , *n*-pentane/EtOAc 30:1 to 1:1) to afford ether **S20** (765 mg, 1.82 mmol, 90%) as a colorless oil.

$R_f = 0.47$  (*n*-pentane/EtOAc, 10:1).

$[\alpha]_D^{24} = -12.8$  ( $c = 3.15$ ,  $\text{CHCl}_3$ ).

$^1\text{H-NMR}$  (500 MHz,  $\text{CDCl}_3$ ):  $\delta$  [ppm] = 7.38 – 7.29 (m, 8H), 7.27 – 7.21 (m, 2H), 5.37 (s, 1H), 3.63 (dt,  $J = 9.1, 4.6$  Hz, 1H), 3.42 – 3.32 (m, 1H), 3.03 ( $s_{br}$ , 1H), 1.91 (dt,  $J = 12.5, 3.2$  Hz, 1H), 1.89 – 1.79 (m, 1H), 1.68 – 1.49 (m, 4H), 1.44 – 1.32 (m, 3H), 1.28 – 1.20 (m, 2H), 1.16 (s, 3H), 1.09 (td,  $J = 13.4, 12.7, 4.2$  Hz, 1H), 0.91 – 0.81 (m, 4H), 0.78 (s, 6H), 0.75 – 0.70 (m, 1H).

$^{13}\text{C-NMR}$  (126 MHz,  $\text{CDCl}_3$ ):  $\delta$  [ppm] = 142.1, 142.1, 128.6 (2C), 128.6 (2C), 127.7, 127.6, 127.2 (2C), 126.9 (2C), 84.5, 72.6, 70.9, 59.0, 56.2, 44.2, 42.1, 39.5, 39.1, 33.5, 33.4, 25.4, 24.4, 21.6, 20.6, 18.5, 15.4.

$\text{IR}$  ( $\text{v}/\text{cm}^{-1}$ , ATR) = 3401, 2927, 2865, 1600, 1490, 1450, 1182, 1070, 1024, 931.

**HRMS (ESI)**:  $m/z$  calculated for  $\text{C}_{29}\text{H}_{40}\text{O}_2\text{Na}^+$   $[\text{M}+\text{Na}]^+$ : 443.2920, found 443.2910.

## Compound **S21**

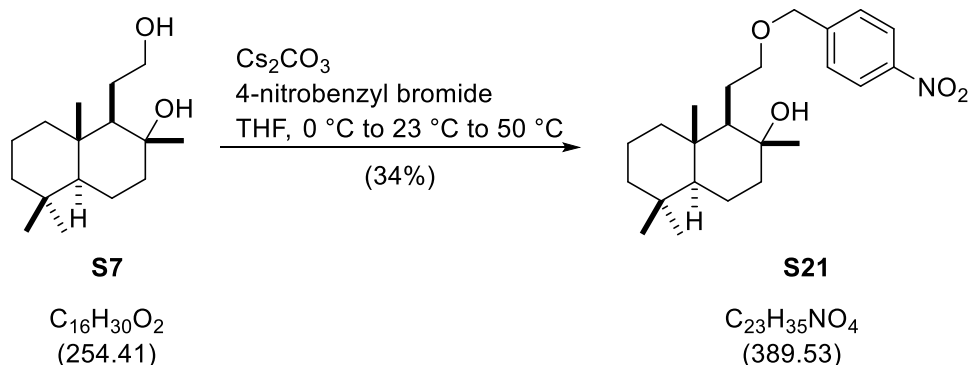

To a stirred solution of caesium carbonate (273 mg, 838  $\mu\text{mol}$ , 2.0 eq.) in THF (2.0 mL) was added diol **S7** (107 mg, 419  $\mu\text{mol}$ , 1.0 eq.) at 0 °C. After 10 min 4-nitrobenzyl bromide (181 mg, 838  $\mu\text{mol}$ , 2.0 eq.) in THF (1.0 mL) was added and the mixture was allowed to warm to 23 °C over 3 d then heated to 50 °C for 3 h. Water and EtOAc were added to the reaction mixture sequentially. The organic phase was separated and the aqueous phase was extracted with EtOAc. The combined organic extracts were washed with brine, dried over  $\text{MgSO}_4$ , filtered and concentrated under reduced pressure. The residue was purified by flash column chromatography ( $\text{SiO}_2$ , *n*-pentane/EtOAc 9:1 to 1:1) to afford ether **S21** (54.7 mg, 140  $\mu\text{mol}$ , 34%, 42% brsm) as a yellow oil and diol **S7** (21.1 mg, 82.9  $\mu\text{mol}$ ) as a white solid.

$R_f = 0.75$  (*n*-pentane/EtOAc, 4:1).

$[\alpha]_D^{23} = -14.9$  ( $c = 1.10$ ,  $\text{CHCl}_3$ ).

**$^1\text{H}$ -NMR** (500 MHz,  $\text{CDCl}_3$ ):  $\delta$  [ppm] = 8.20 (d,  $J = 8.5$  Hz, 2H), 7.49 (d,  $J = 8.5$  Hz, 2H), 4.62 (s, 2H), 3.70 – 3.63 (m, 1H), 3.50 – 3.44 (m, 1H), 2.75 (*s<sub>br</sub>*, 1H), 1.91 (dt,  $J = 12.5, 3.3$  Hz, 1H), 1.85 – 1.78 (m, 1H), 1.68 – 1.56 (m, 4H), 1.45 – 1.36 (m, 3H), 1.31 – 1.23 (m, 1H), 1.21 (t,  $J = 4.3$  Hz, 1H), 1.16 (s, 3H), 1.15 – 1.10 (m, 1H), 0.92 (dd,  $J = 12.4, 2.3$  Hz, 1H), 0.91 – 0.88 (m, 1H), 0.87 (s, 3H), 0.80 (s, 3H), 0.79 (s, 3H).

**$^{13}\text{C}$ -NMR** (126 MHz,  $\text{CDCl}_3$ ):  $\delta$  [ppm] = 147.6, 145.8, 127.9 (2C), 123.9 (2C), 73.2, 72.8, 72.1, 59.3, 56.3, 44.3, 42.1, 39.8, 39.2, 33.6, 33.4, 25.5, 24.5, 21.6, 20.6, 18.6, 15.4.

**IR** ( $\nu/\text{cm}^{-1}$ , ATR) = 3458, 2925, 2862, 1603, 1519, 1460, 1385, 1342, 1098, 1015.

**HRMS (ESI)**:  $m/z$  calculated for  $\text{C}_{23}\text{H}_{35}\text{NO}_4\text{Na}^+$   $[\text{M}+\text{Na}]^+$ : 412.2458, found 412.2473.

Note: This procedure is unoptimized.

Compound **13** from **S8**<sup>18</sup>

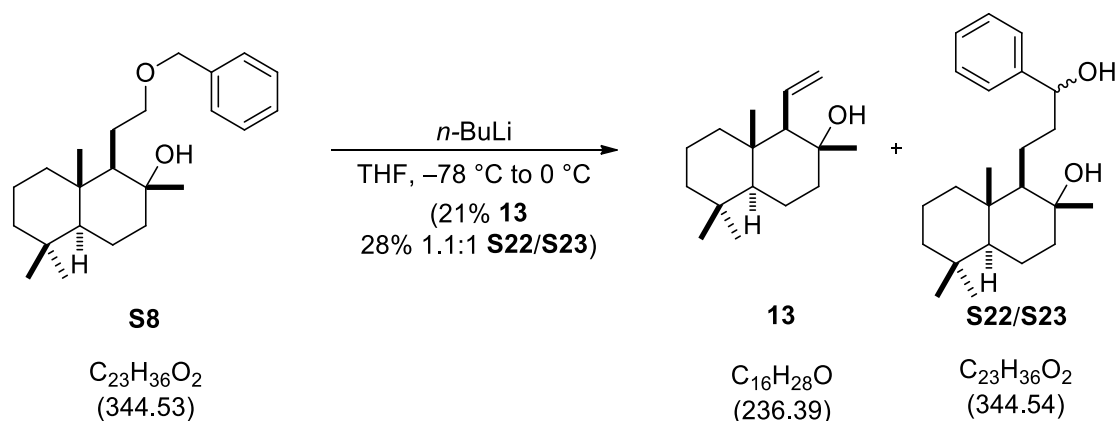

To a solution of ether **S8** (100 mg, 290  $\mu\text{mol}$ , 1.0 eq.) in THF (4 mL) at  $-78\text{ }^{\circ}\text{C}$  was added a solution of  $n\text{-BuLi}$  (396  $\mu\text{L}$ , 2.5 M in hexane, 871  $\mu\text{mol}$ , 3.0 eq.). After stirring for 30 min at that temperature the reaction mixture was warmed to  $0\text{ }^{\circ}\text{C}$  and stirred for 12 h while reaching  $23\text{ }^{\circ}\text{C}$ . Water was added and the reaction mixture was diluted with EtOAc. The organic phase was separated and the aqueous phase was extracted with EtOAc. The combined organic extracts were washed with brine, dried over  $\text{MgSO}_4$ , filtered and concentrated under reduced pressure. The residue was purified by flash column chromatography ( $\text{SiO}_2$ ,  $n\text{-pentane/EtOAc}$  10:1 to 1:1) to afford alkene **13** (14.2 mg, 60.1  $\mu\text{mol}$ , 21%) as a white solid and **S22** (15.2 mg, 44.1  $\mu\text{mol}$ , 15%) as a light-yellow oil and **S23** (13.4 mg, 38.9  $\mu\text{mol}$ , 13%) as a light-yellow oil.

**S22**

$R_f = 0.45$  ( $n\text{-pentane/EtOAc}$ , 3:1).

$[\alpha]_D^{23} = -9.10$  ( $c = 1.12$ ,  $\text{CHCl}_3$ ).

**$^1\text{H-NMR}$**  (500 MHz,  $\text{CDCl}_3$ ):  $\delta$  [ppm] = 7.37 (d,  $J = 7.2\text{ Hz}$ , 2H), 7.33 (t,  $J = 7.5\text{ Hz}$ , 2H), 7.24 (t,  $J = 7.3\text{ Hz}$ , 1H), 4.80 (dd,  $J = 10.2, 3.4\text{ Hz}$ , 1H), 3.56 – 2.51 (m, 1H), 1.86 – 1.76 (m, 2H), 1.73 – 1.67 (m, 1H), 1.67 – 1.55 (m, 4H), 1.51 – 1.34 (m, 4H), 1.31 – 1.23 (m, 3H), 1.20 – 1.08 (m, 4H), 0.97 – 0.89 (m, 2H), 0.88 (s, 3H), 0.80 (s, 3H), 0.79 (s, 3H).

**$^{13}\text{C-NMR}$**  (126 MHz,  $\text{CDCl}_3$ ):  $\delta$  [ppm] = 145.3, 128.4 (2C), 127.2, 125.9 (2C), 74.6, 71.8, 58.6, 56.2, 43.9, 42.1, 41.3, 34.0, 39.3, 33.5, 33.3, 24.8, 21.7, 20.6, 20.4, 18.5, 15.4.

**IR** ( $\nu/\text{cm}^{-1}$ , ATR) = 3371, 2991, 2922, 2876, 1456, 1364, 1203, 1157, 1068, 759.

**HRMS (ESI)**:  $m/z$  calculated for  $C_{23}H_{36}O_2K^+$   $[M+K]^+$ : 383.2347, found 383.2362.

**S23**

$R_f = 0.36$  (*n*-pentane/EtOAc, 3:1).

$[\alpha]_D^{23} = +20.0$  ( $c = 0.76$ , CHCl<sub>3</sub>).

**<sup>1</sup>H-NMR** (700 MHz, CDCl<sub>3</sub>):  $\delta$  [ppm] = 7.36 – 7.34 (m, 2H), 7.34 – 7.31 (m, 2H), 7.26 – 7.23 (m, 1H), 4.70 (dd,  $J = 9.2, 4.0$  Hz, 1H), 1.89 – 1.77 (m, 3H), 1.70 – 1.62 (m, 3H), 1.59 – 1.53 (m, 1H), 1.53 – 1.49 (m, 1H), 1.49 – 1.43 (m, 1H), 1.43 – 1.32 (m, 4H), 1.29 – 1.22 (m, 2H), 1.17 (s, 3H), 1.15 – 1.11 (m, 1H), 0.98 – 0.93 (m, 2H), 0.86 (s, 3H), 0.78 (s, 3H), 0.76 (s, 3H).

**<sup>13</sup>C-NMR** (176 MHz, CDCl<sub>3</sub>):  $\delta$  [ppm] = 145.3, 128.5 (2C), 127.4, 125.9 (2C), 76.5, 74.9, 61.6, 56.1, 44.4, 42.5, 42.1, 39.8, 39.3, 33.5, 33.4, 24.5, 22.5, 21.6, 20.7, 18.5, 15.3.

**IR** (v/cm<sup>-1</sup>, ATR) = 3352, 2922, 2867, 1737, 1457, 1387, 1126, 1082, 970, 762.

**HRMS (ESI)**:  $m/z$  calculated for C<sub>23</sub>H<sub>36</sub>O<sub>2</sub>K<sup>+</sup> [M+K]<sup>+</sup>: 383.2347, found 383.2363.

Note: No attempt was made to determine the relative configuration of the epimeric alcohols

**S22/S23**

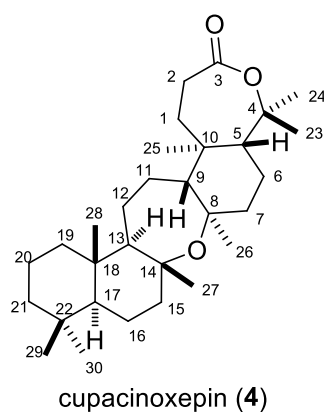

**Table 1.:** Comparison of the  $^1\text{H}$ -NMR spectra of cupacinoxepin

| No. | Isolated cupacinoxepin <sup>7</sup><br>600 MHz, $\text{CDCl}_3$<br>$\delta_{\text{H}}$ mult ( $J$ , Hz) | Synthetic cupacinoxepin<br>500 MHz, $\text{CDCl}_3$<br>$\delta_{\text{H}}$ mult ( $J$ , Hz) |
|-----|---------------------------------------------------------------------------------------------------------|---------------------------------------------------------------------------------------------|
| 1   | 1.66 m<br>1.89 <sup>a</sup>                                                                             | 1.67 m<br>1.88 <sup>a</sup>                                                                 |
| 2   | 2.66 (td, $J = 4.2, 14.4$ )<br>2.48 (dt, 3.6, 14.4)                                                     | 2.66 (td, $J = 14.0, 4.8$ )<br>2.48 (ddd, $J = 14.0, 5.2, 3.5$ )                            |
| 3   |                                                                                                         |                                                                                             |
| 4   |                                                                                                         |                                                                                             |
| 5   | 1.87 <sup>a</sup>                                                                                       | 1.86 <sup>a</sup>                                                                           |
| 6   | 1.48-1.56 <sup>a</sup>                                                                                  | 1.47-1.56 <sup>a</sup>                                                                      |
| 7   | 1.74 <sup>a</sup><br>1.55 <sup>a</sup>                                                                  | 1.73 <sup>a</sup><br>1.54 <sup>a</sup>                                                      |
| 8   |                                                                                                         |                                                                                             |
| 9   | 1.51 <sup>a</sup>                                                                                       | 1.50 <sup>a</sup>                                                                           |
| 10  |                                                                                                         |                                                                                             |
| 11  | 1.73 <sup>a</sup><br>1.35 <sup>a</sup>                                                                  | 1.72 <sup>a</sup><br>1.37 <sup>a</sup>                                                      |
| 12  | 1.84 <sup>a</sup><br>1.22 <sup>a</sup>                                                                  | 1.83 <sup>a</sup><br>1.23 <sup>a</sup>                                                      |
| 13  | 1.41 <sup>a</sup>                                                                                       | 1.41 <sup>a</sup>                                                                           |
| 14  |                                                                                                         |                                                                                             |
| 15  | 1.76 <sup>a</sup><br>1.55 <sup>a</sup>                                                                  | 1.76 <sup>a</sup><br>1.54 <sup>a</sup>                                                      |
| 16  | 1.22 <sup>a</sup><br>1.60 <sup>a</sup>                                                                  | 1.21 <sup>a</sup><br>1.60 <sup>a</sup>                                                      |
| 17  | 0.87 <sup>a</sup>                                                                                       | 0.87 <sup>a</sup>                                                                           |
| 18  |                                                                                                         |                                                                                             |
| 19  | 1.77 <sup>a</sup><br>0.89 <sup>a</sup>                                                                  | 1.78 <sup>a</sup><br>0.88 <sup>a</sup>                                                      |
| 20  | 1.58 <sup>a</sup><br>1.44 <sup>a</sup>                                                                  | 1.60 <sup>a</sup><br>1.43 <sup>a</sup>                                                      |
| 21  | 1.36 <sup>a</sup>                                                                                       | 1.35 <sup>a</sup>                                                                           |

|    |                     |                     |
|----|---------------------|---------------------|
|    | 1.13 dt (3.6, 13.2) | 1.13 dt (13.5, 4.3) |
| 22 |                     |                     |
| 23 | 1.48 s              | 1.48 s              |
| 24 | 1.36 s              | 1.36 s              |
| 25 | 1.00 s              | 1.00 s              |
| 26 | 1.29 s              | 1.29 s              |
| 27 | 1.25 s              | 1.25 s              |
| 28 | 0.74 s              | 0.74 s              |
| 29 | 0.77 s              | 0.77 s              |
| 30 | 0.85 s              | 0.85 s              |

<sup>a</sup> Signal overlapping

**Table 2.:** Comparison of the <sup>13</sup>C-NMR spectra of cupacinoxepin

| No. | <sup>13</sup> C-NMR isolated<br>cupacinoxepin <sup>7</sup><br>150 MHz, CDCl <sub>3</sub> | <sup>13</sup> C-NMR synthetic<br>cupacinoxepin<br>176 MHz, CDCl <sub>3</sub> | Deviation |
|-----|------------------------------------------------------------------------------------------|------------------------------------------------------------------------------|-----------|
| 1   | 40.2                                                                                     | 40.3                                                                         | −0.1      |
| 2   | 32.4                                                                                     | 32.6                                                                         | −0.2      |
| 3   | 175.0                                                                                    | 175.0                                                                        | 0.0       |
| 4   | 85.8                                                                                     | 85.9                                                                         | −0.1      |
| 5   | 52.1                                                                                     | 52.2                                                                         | −0.1      |
| 6   | 25.9                                                                                     | 26.0                                                                         | −0.1      |
| 7   | 43.7                                                                                     | 43.7                                                                         | 0.0       |
| 8   | 78.8                                                                                     | 78.9                                                                         | −0.1      |
| 9   | 61.2                                                                                     | 61.4                                                                         | −0.2      |
| 10  | 41.0                                                                                     | 41.2                                                                         | −0.2      |
| 11  | 26.4                                                                                     | 26.5                                                                         | −0.1      |
| 12  | 25.1                                                                                     | 25.2                                                                         | −0.1      |
| 13  | 60.8                                                                                     | 61.0                                                                         | −0.2      |
| 14  | 80.4                                                                                     | 80.5                                                                         | −0.1      |
| 15  | 45.3                                                                                     | 45.3                                                                         | 0.0       |
| 16  | 20.8                                                                                     | 20.9                                                                         | −0.1      |
| 17  | 56.2                                                                                     | 56.3                                                                         | −0.1      |
| 18  | 39.3                                                                                     | 39.0                                                                         | +0.3      |
| 19  | 40.5                                                                                     | 40.5                                                                         | 0.0       |
| 20  | 18.9                                                                                     | 19.0                                                                         | −0.1      |
| 21  | 42.0                                                                                     | 42.1                                                                         | −0.1      |
| 22  | 33.5                                                                                     | 33.6                                                                         | −0.1      |
| 23  | 30.7                                                                                     | 30.8                                                                         | −0.1      |
| 24  | 27.3                                                                                     | 27.4                                                                         | −0.1      |
| 25  | 18.3                                                                                     | 18.4                                                                         | −0.1      |
| 26  | 24.1                                                                                     | 24.2                                                                         | −0.1      |
| 27  | 25.4                                                                                     | 25.5                                                                         | −0.1      |
| 28  | 15.9                                                                                     | 16.0                                                                         | −0.1      |

|    |      |      |      |
|----|------|------|------|
| 29 | 21.6 | 21.6 | 0.0  |
| 30 | 33.5 | 33.6 | −0.1 |

Isolated Cupacinoxepin ( $^1\text{H}$ , 600 MHz,  $\text{CDCl}_3$ )<sup>7</sup>

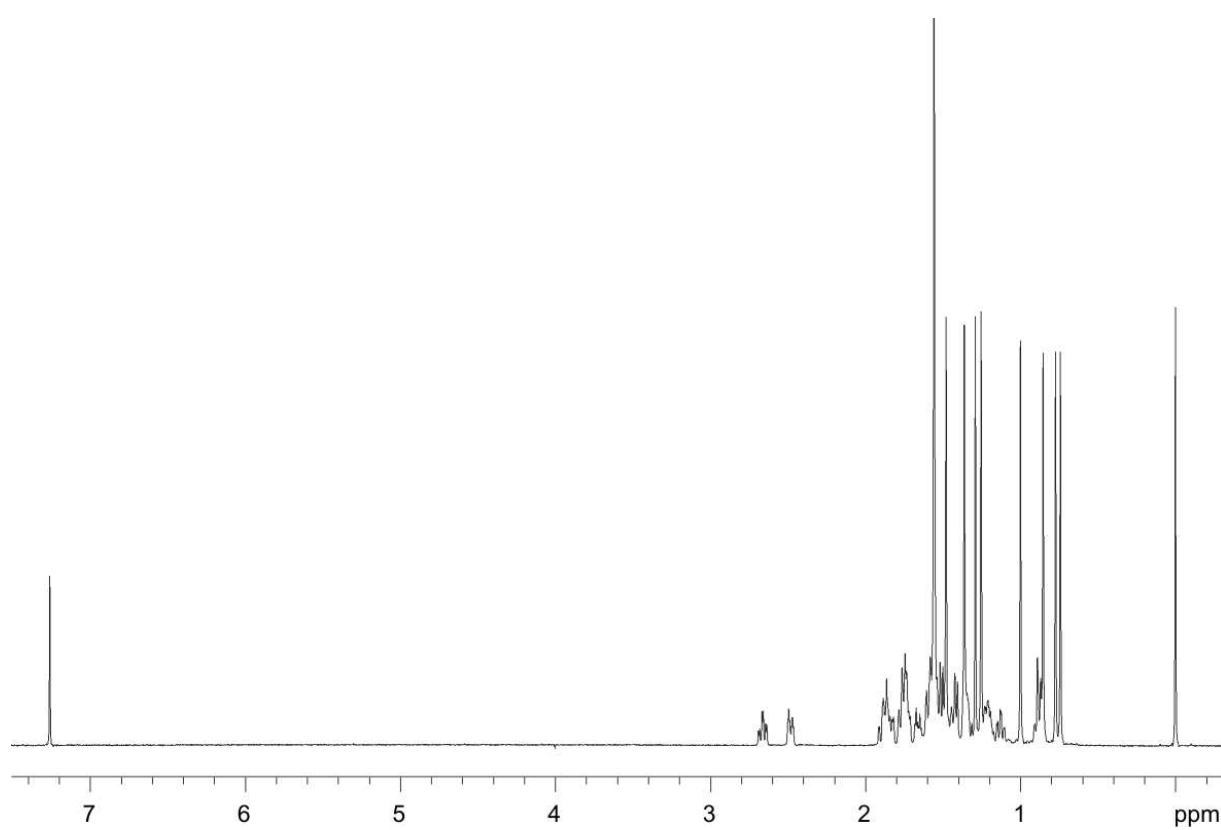

Synthetic Cupacinoxepin ( $^1\text{H}$ , 500 MHz,  $\text{CDCl}_3$ )

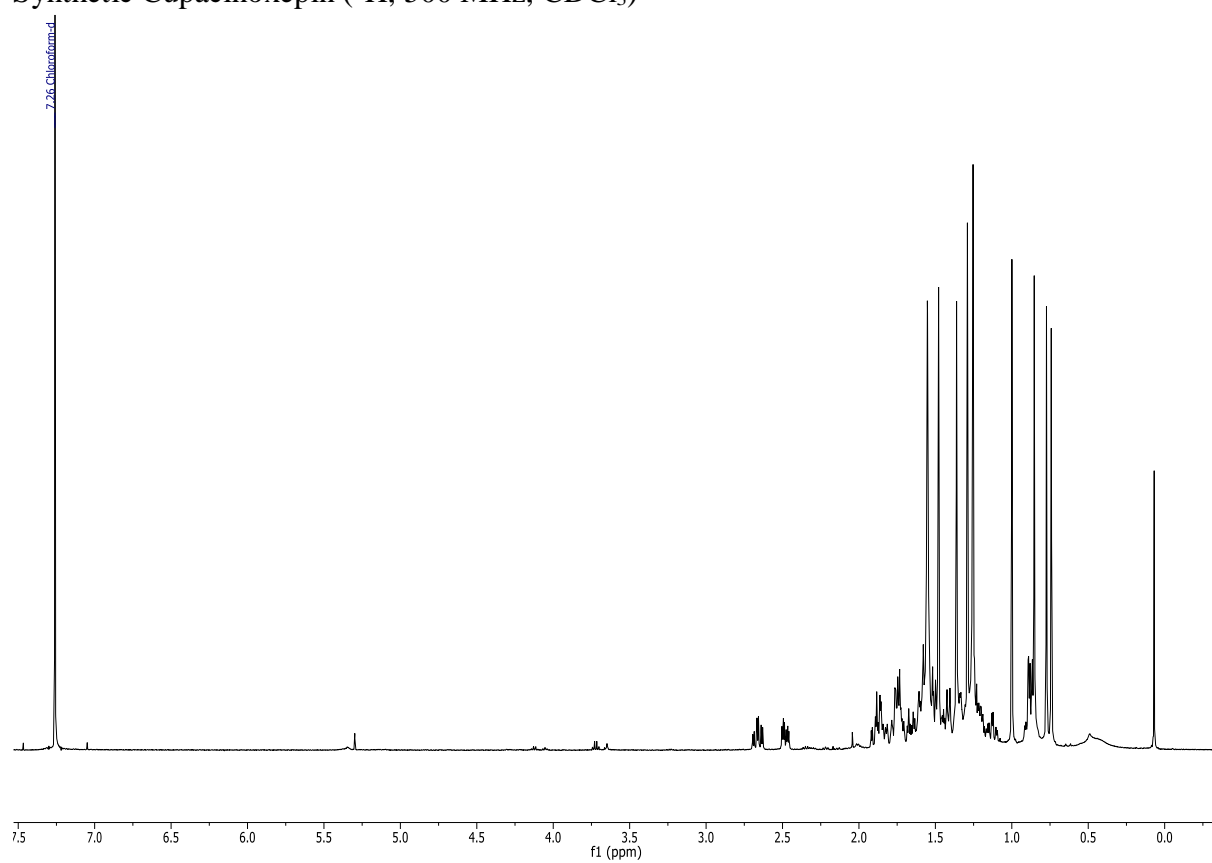

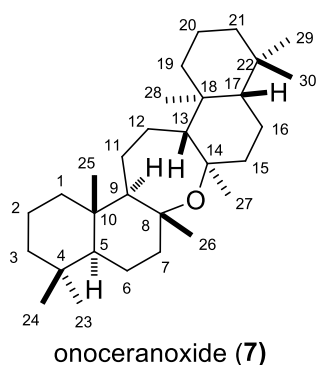

**Table 3.:** Comparison of the  $^1\text{H}$ -NMR spectra of onoceranoxide **7**

| no.    | Isolated onoceranoxide <sup>8</sup><br>100 MHz, $\text{CDCl}_3$<br>$\delta_{\text{H}}$ mult ( $J$ , Hz) | Synthetic onoceranoxide<br>700 MHz, $\text{CDCl}_3$<br>$\delta_{\text{H}}$ mult ( $J$ , Hz) |
|--------|---------------------------------------------------------------------------------------------------------|---------------------------------------------------------------------------------------------|
| 1, 19  | /                                                                                                       | 1.76 (m), 0.87 (m)                                                                          |
| 2, 20  | /                                                                                                       | 1.58 (m), 1.40 (m)                                                                          |
| 3, 21  | /                                                                                                       | 1.34 (m), 1.11 (m)                                                                          |
| 4, 22  | /                                                                                                       | /                                                                                           |
| 5, 17  | /                                                                                                       | 0.88 (m)                                                                                    |
| 6, 16  | /                                                                                                       | 1.58 (m), 1.21 (m)                                                                          |
| 7, 15  | /                                                                                                       | 1.75 (m), 1.56 (m)                                                                          |
| 8, 14  | /                                                                                                       | /                                                                                           |
| 9, 13  | /                                                                                                       | 1.38 (m)                                                                                    |
| 10, 18 | /                                                                                                       | /                                                                                           |
| 11, 12 | /                                                                                                       | 1.77 (m), 1.21 (m)                                                                          |
| 23, 30 | 0.845                                                                                                   | 0.85 (s)                                                                                    |
| 24, 29 | 0.735                                                                                                   | 0.74 (s)                                                                                    |
| 25, 28 | 0.767                                                                                                   | 0.77 (s)                                                                                    |
| 26, 27 | 1.259                                                                                                   | 1.26 (s)                                                                                    |

**Table 4.:** Comparison of the  $^{13}\text{C}$ -NMR spectra of onoceranoxide **7**

| no.   | $^{13}\text{C}$ -NMR isolated<br>onoceranoxide <sup>8</sup><br>25 MHz, $\text{CDCl}_3$ | $^{13}\text{C}$ -NMR synthetic<br>onoceranoxide<br>176 MHz, $\text{CDCl}_3$ | Deviation |
|-------|----------------------------------------------------------------------------------------|-----------------------------------------------------------------------------|-----------|
| 1, 19 | 40.5                                                                                   | 40.5                                                                        | 0         |
| 2, 20 | 19.0                                                                                   | 19.1                                                                        | -0.1      |
| 3, 21 | 42.2                                                                                   | 42.2                                                                        | 0         |
| 4, 22 | 33.5                                                                                   | 33.6                                                                        | -0.1      |
| 5, 17 | 56.3                                                                                   | 56.3                                                                        | 0         |
| 6, 16 | 20.8                                                                                   | 20.9                                                                        | -0.1      |
| 7, 15 | 45.4                                                                                   | 45.4                                                                        | 0         |
| 8, 14 | 79.9                                                                                   | 80.1                                                                        | -0.2      |
| 9, 13 | 60.9                                                                                   | 60.9                                                                        | 0         |

|        |      |      |      |
|--------|------|------|------|
| 10, 18 | 38.9 | 39.0 | −0.1 |
| 11, 12 | 25.0 | 25.1 | −0.1 |
| 23, 30 | 33.5 | 33.6 | −0.1 |
| 24, 29 | 21.5 | 21.7 | −0.2 |
| 25, 28 | 15.8 | 15.9 | −0.1 |
| 26, 27 | 25.4 | 25.4 | 0    |

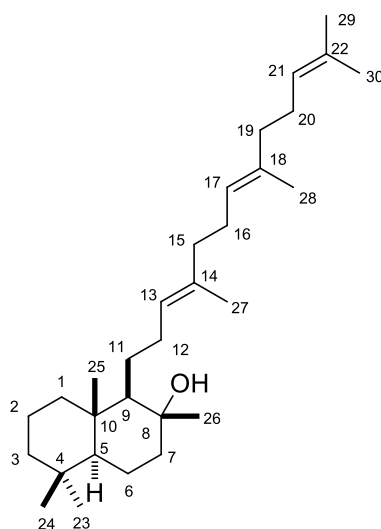

8 $\alpha$ -hydroxypolypoda-13,17,21 (**9**)

**Table 5.:** Comparison of the  $^1\text{H}$ -NMR spectra of 8 $\alpha$ -hydroxypolypoda-13,17,21

| no. | Isolated <b>9</b> <sup>10</sup><br>(270 MHz, $\text{CDCl}_3$ )<br>$\delta_{\text{H}}$ mult ( $J$ , Hz) | Synthetic <b>9</b> (500 MHz,<br>$\text{CDCl}_3$ )<br>$\delta_{\text{H}}$ mult ( $J$ , Hz) |
|-----|--------------------------------------------------------------------------------------------------------|-------------------------------------------------------------------------------------------|
|     |                                                                                                        | 1.65 <sup>a</sup>                                                                         |
| 1   | /                                                                                                      | 0.98 td (13.0, 3.7)                                                                       |
|     |                                                                                                        | 1.64 <sup>a</sup>                                                                         |
| 2   | /                                                                                                      | 1.40 <sup>a</sup>                                                                         |
|     |                                                                                                        | 1.39 <sup>a</sup>                                                                         |
| 3   | /                                                                                                      | 1.14 <sup>a</sup>                                                                         |
| 4   | /                                                                                                      | /                                                                                         |
| 5   | /                                                                                                      | 0.91 dd (12.1, 2.3)                                                                       |
|     |                                                                                                        | 1.66 <sup>a</sup>                                                                         |
| 6   | /                                                                                                      | 1.26 <sup>a</sup>                                                                         |
|     |                                                                                                        | 1.86 dt (12.1, 3.1)                                                                       |
| 7   | /                                                                                                      | 1.36 <sup>a</sup>                                                                         |
| 8   | /                                                                                                      | /                                                                                         |
| 9   | /                                                                                                      | 0.91 dd (12.1, 2.3)                                                                       |
| 10  | /                                                                                                      | /                                                                                         |
|     |                                                                                                        | 1.44 <sup>a</sup>                                                                         |
| 11  | /                                                                                                      | 1.26 <sup>a</sup>                                                                         |
|     |                                                                                                        | 2.07 <sup>a</sup>                                                                         |
| 12  | /                                                                                                      | 2.07 <sup>a</sup>                                                                         |
| 13  | 5.07 – 5.21 bt (6.2)                                                                                   | 5.21 – 5.16 m                                                                             |
| 14  | /                                                                                                      | /                                                                                         |
|     |                                                                                                        | 1.99 <sup>a</sup>                                                                         |
| 15  | /                                                                                                      | 1.99 <sup>a</sup>                                                                         |
|     |                                                                                                        | 1.96 – 2.11 m <sup>a</sup>                                                                |
| 16  | /                                                                                                      | 1.96 – 2.11 m <sup>a</sup>                                                                |
| 17  | 5.07 – 5.21 bt (6.2)                                                                                   | 5.14 – 5.06 m <sup>a</sup>                                                                |
| 18  | /                                                                                                      | /                                                                                         |
| 19  | /                                                                                                      | 1.99 (m)                                                                                  |
| 20  | /                                                                                                      | 1.96 – 2.11 m <sup>a</sup>                                                                |

|    |                      |                               |
|----|----------------------|-------------------------------|
|    |                      | 1.96 – 2.11 m <sup>a</sup>    |
| 21 | 5.07 – 5.21 bt (6.2) | 5.14 – 5.06 m <sup>a</sup>    |
| 22 | /                    | /                             |
| 23 | 0.869                | 0.87 s                        |
| 24 | 0.789                | 0.79 s                        |
| 25 | 0.789                | 0.79 s                        |
| 26 | 1.130                | 1.13 s                        |
| 27 | 1.616                | 1.60 s <sup>a</sup> or 1.61 s |
| 28 | 1.602                | 1.60 s <sup>a</sup> or 1.61 s |
| 29 | 1.602                | 1.68 s                        |
| 30 | 1.681                | 1.60 s <sup>a</sup>           |

<sup>a</sup> Signal overlapping

**Table 6.:** Comparison of the <sup>13</sup>C-NMR spectra of 8α-hydroxypolypoda-13,17,21

| no. | <sup>13</sup> C Natural <b>9</b> <sup>10</sup><br>(68 MHz, CDCl <sub>3</sub> ) | <sup>13</sup> C Synthetic <b>9</b><br>(176 MHz, CDCl <sub>3</sub> ) | Deviation |
|-----|--------------------------------------------------------------------------------|---------------------------------------------------------------------|-----------|
| 1   | 39.7                                                                           | 39.9                                                                | −0.2      |
| 2   | 18.5                                                                           | 18.6                                                                | −0.1      |
| 3   | 42.5                                                                           | 42.2                                                                | −0.3      |
| 4   | 33.3                                                                           | 33.4                                                                | −0.1      |
| 5   | 56.3                                                                           | 56.3                                                                | 0         |
| 6   | 20.6                                                                           | 20.7                                                                | −0.1      |
| 7   | 44.6                                                                           | 44.7                                                                | −0.1      |
| 8   | 74.1                                                                           | 74.2                                                                | −0.1      |
| 9   | 61.6                                                                           | 61.7                                                                | −0.1      |
| 10  | 39.2                                                                           | 39.3                                                                | −0.1      |
| 11  | 25.6                                                                           | 25.7                                                                | −0.1      |
| 12  | 31.5                                                                           | 31.6                                                                | −0.1      |
| 13  | 125.1                                                                          | 125.2                                                               | −0.1      |
| 14  | 135.0                                                                          | 135.1                                                               | −0.1      |
| 15  | 39.8                                                                           | 39.9                                                                | −0.1      |
| 16  | 26.7                                                                           | 26.8 or 26.9                                                        |           |
| 17  | 124.3                                                                          | 124.4                                                               | −0.1      |
| 18  | 135.2                                                                          | 135.3                                                               | −0.1      |
| 19  | 39.8                                                                           | 39.9                                                                | −0.1      |
| 20  | 26.8                                                                           | 26.8 or 26.9                                                        |           |
| 21  | 124.5                                                                          | 124.6                                                               | −0.1      |
| 22  | 131.3                                                                          | 131.4                                                               | −0.1      |
| 23  | 33.4                                                                           | 33.6                                                                | −0.2      |
| 24  | 21.6                                                                           | 21.7                                                                | −0.1      |
| 25  | 15.4                                                                           | 15.6                                                                | −0.2      |
| 26  | 23.9                                                                           | 23.9                                                                | 0         |
| 27  | 16.0                                                                           | 16.2 or 16.4                                                        |           |

|    |      |              |      |
|----|------|--------------|------|
| 28 | 16.1 | 16.2 or 16.4 |      |
| 29 | 25.7 | 25.9         | −0.2 |
| 30 | 17.7 | 17.8         | −0.1 |

### 3. Screening of Reaction Conditions

**Scheme 1.:** Selected screening conditions for the formation of alkene **13**.

Direct conversion of the primary alcohol into a leaving group, selenide or xanthate ester led to ambroxide formation via intramolecular substitution

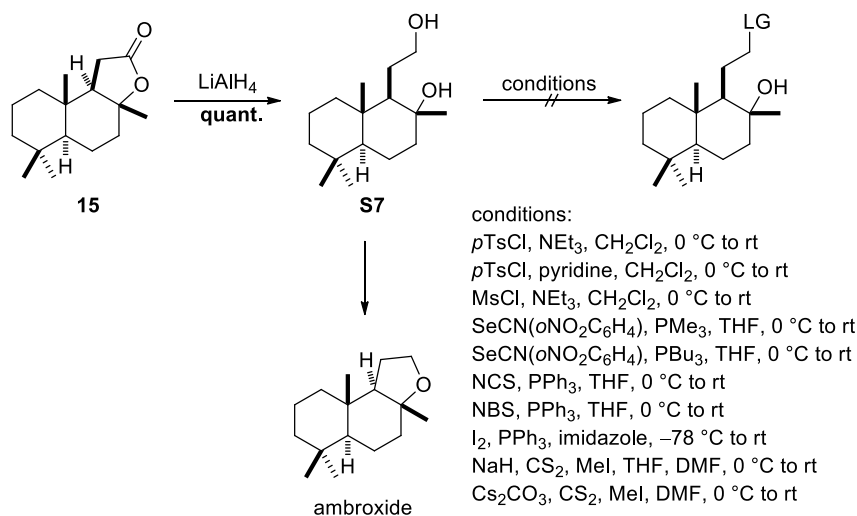

**Table 7.:** Selected screening conditions for the Wittig-type fragmentation.

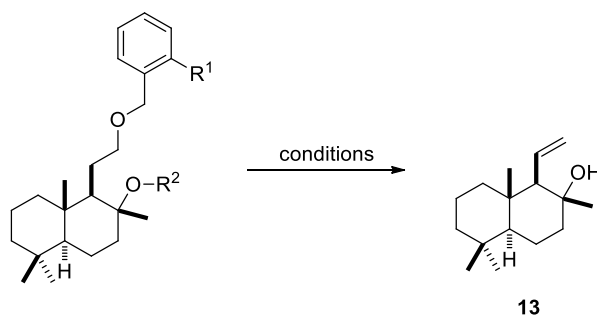

| Entry | R <sup>1</sup> | R <sup>2</sup>    | Conditions                                                              | Yield (%) / Observation |
|-------|----------------|-------------------|-------------------------------------------------------------------------|-------------------------|
| 1     | H              | H                 | <i>n</i> -BuLi (3 eq.), THF, -78 °C, 30 min to 0 °C <sup>18</sup>       | 20                      |
| 2     | H              | H                 | <i>n</i> -BuLi (4 eq.), Et <sub>2</sub> O, -78 °C, 30 min to 0 °C       | <5                      |
| 3     | H              | H                 | <i>n</i> -BuLi (4 eq.), 1,2-dimethoxyethane, -78 °C, 30 min to 0 °C     | 16                      |
| 4     | H              | H                 | LDA (4 eq.), THF, -78 °C, 30 min to 0 °C                                | <5                      |
| 5     | H              | H                 | <i>s</i> -BuLi (4 eq.), THF, -78 °C, 30 min to 0 °C                     | 28                      |
| 6     | H              | H                 | <i>s</i> -BuLi (5 eq.), THF, -78 °C, 30 min to 0 °C                     | 26                      |
| 7     | H              | H                 | <i>t</i> -BuLi (4 eq.), THF, -78 °C, 30 min to 0 °C                     | 20                      |
| 8     | H              | H                 | <i>n</i> -BuLi (4 eq.), THF, TMEDA (4 eq.), -78 °C, 30 min to 0 °C      | 17                      |
| 9     | H              | SiMe <sub>3</sub> | <i>n</i> -BuLi (3 eq.), THF, -78 °C, 30 min to 0 °C                     | 24 <sup>a</sup>         |
| 10    | Me             | H                 | <i>n</i> -BuLi (4 eq.), THF, -78 °C, 30 min to -40 °C                   | No product formation    |
| 11    | Me             | H                 | <i>n</i> -BuLi (4 eq.), THF, -78 °C, 30 min to -28 °C                   | 42                      |
| 12    | Me             | H                 | <i>n</i> -BuLi (4 eq.), THF, -78 °C, 10 min to -13 °C (0.46 mmol scale) | 44                      |

|    |    |   |                                                                            |                 |
|----|----|---|----------------------------------------------------------------------------|-----------------|
| 13 | Me | H | <i>n</i> -BuLi (4 eq.), THF, −78 °C, 30 min to −13 °C<br>(13.2 mmol scale) | 41              |
| 14 | Me | H | <i>n</i> -BuLi (4 eq.), THF, −78 °C, 30 min to 0 °C                        | 37              |
| 15 | Me | H | <i>n</i> -BuLi (4 eq.), THF, −78 °C, 30 min to 50 °C                       | 34              |
| 16 | Me | H | <i>s</i> -BuLi (4 eq.), THF, −78 °C, 30 min to 0 °C                        | 35 <sup>a</sup> |
| 17 | Me | H | <i>n</i> -BuLi (8 eq.), THF, −78 °C, 30 min to 0 °C                        | 29              |

<sup>a</sup> determined by H-NMR using an internal standard

**Table 8.:** Screening of ether derivatives for Wittig-type fragmentation

|                                                                                                                                                                                                                                                                                                           |                                                                                              |                                                                                     |                                                                                       |
|-----------------------------------------------------------------------------------------------------------------------------------------------------------------------------------------------------------------------------------------------------------------------------------------------------------|----------------------------------------------------------------------------------------------|-------------------------------------------------------------------------------------|---------------------------------------------------------------------------------------|
| 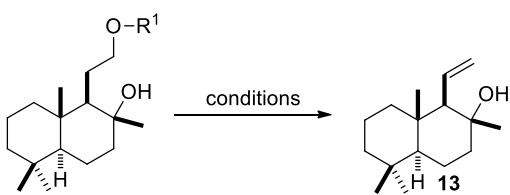 <p>conditions A = <i>n</i>-BuLi (4 eq.), THF, -78 °C 30 min to 0 °C<br/> conditions B = <i>n</i>-BuLi (4 eq.), THF, -78 °C 10 min to -13 °C<br/> conditions C = <i>n</i>-BuLi (4 eq.), THF, -78 °C to rt, overnight</p> |                                                                                              |                                                                                     |                                                                                       |
| R <sup>1</sup> =                                                                                                                                                                                                                                                                                          |                                                                                              |                                                                                     |                                                                                       |
| 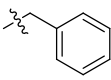                                                                                                                                                                                                                         | 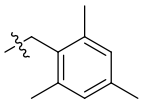            | 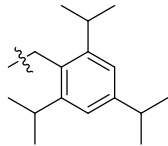  | 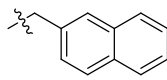   |
| conditions A: 20% <sup>a</sup><br>conditions C: 20%                                                                                                                                                                                                                                                       | conditions A: <5%<br>trace product formation<br>conditions C: <5%<br>trace product formation | conditions C: 0%                                                                    | conditions B: 12%                                                                     |
| 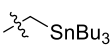                                                                                                                                                                                                                         | 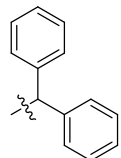           | 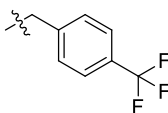  | 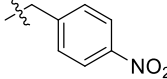   |
| conditions C: 0%                                                                                                                                                                                                                                                                                          | conditions C: 0%                                                                             | conditions A: 0% <sup>a</sup><br>conditions B: 0%                                   | conditions A: 0% <sup>a</sup>                                                         |
| 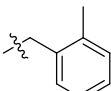                                                                                                                                                                                                                       | 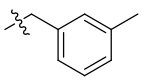          | 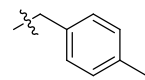 |                                                                                       |
| conditions A: 37%<br>conditions B: 44%<br>conditions C: 42%                                                                                                                                                                                                                                               | conditions B: 24%                                                                            | conditions B: 22%                                                                   |                                                                                       |
| 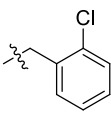                                                                                                                                                                                                                       | 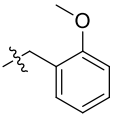          | 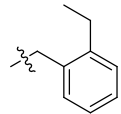 | 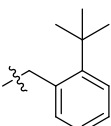 |
| conditions A: 7%                                                                                                                                                                                                                                                                                          | conditions C: 0%                                                                             | conditions B: 41%                                                                   | conditions B: <5%<br>trace product formation                                          |

<sup>a</sup> 3.0 eq. *n*-BuLi used

Ether derivatives with alkyl substituents and benzylic hydrogen atoms in the 2-position of the aromatic ring gave higher yields of alkene **13** than ethers with electron withdrawing-, electron donating-, or sterically hindered substituents.

**Table 9.:** Tricyclization attempts of substrate **9** to give pentacyclic derivatives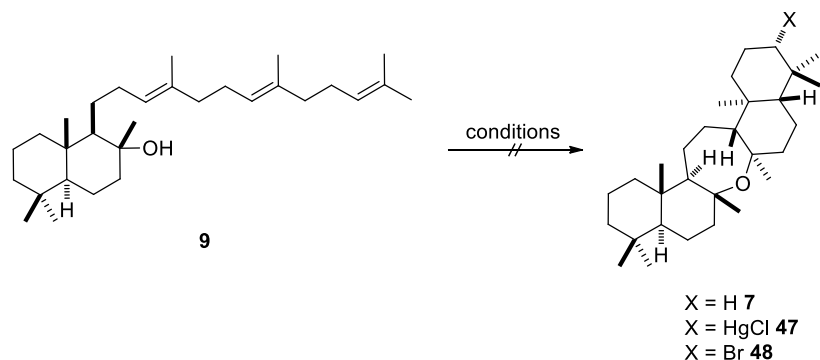

| Entry | Conditions                                                                                                                     | Concentraion<br>[mmol/mL] | Observation     |
|-------|--------------------------------------------------------------------------------------------------------------------------------|---------------------------|-----------------|
| 1     | Hg(OTFA) <sub>2</sub> (1.2 eq.), MeNO <sub>2</sub> , -20 °C,<br>Work up: NaCl (aq.)                                            | 0.004                     | Complex mixture |
| 2     | Hg(OTf) <sub>2</sub> (1.4 eq.), MeNO <sub>2</sub> , Me <sub>2</sub> NPh (1.5<br>eq.), -20 °C, Work up: NaCl (aq.)              | 0.006                     | Complex mixture |
| 3     | Hg(OTf) <sub>2</sub> (1.2 eq.), MeNO <sub>2</sub> ,<br>tetramethylurea (1.3 eq.), -20 °C, Work<br>up: NaCl (aq.)               | 0.003                     | Complex mixture |
| 4     | Hg(OTf) <sub>2</sub> (1.2 eq.), CH <sub>2</sub> Cl <sub>2</sub> ,<br>tetramethylurea (2.4 eq.), -20 °C, Work<br>up: NaCl (aq.) | 0.007                     | Complex mixture |
| 5     | Hg(OTf) <sub>2</sub> (1.2 eq.), MeCN,<br>tetramethylurea (2.4 eq.), -20 °C, Work<br>up: NaCl (aq.)                             | 0.005                     | Complex mixture |
| 6     | SnCl <sub>4</sub> (2.0 eq.), <i>rac</i> -BINOL (2.2 eq.),<br>CH <sub>2</sub> Cl <sub>2</sub> , -78 °C                          | 0.01                      | Complex mixture |
| 7     | HFIP, eosin Y, rt, green LED                                                                                                   | 0.1                       | Complex mixture |
| 8     | BDSB, MeNO <sub>2</sub> /CH <sub>2</sub> Cl <sub>2</sub> (3:1), -20 °C                                                         | 0.003                     | Complex mixture |

**Table 10.:** Screening conditions **12** to **10**:

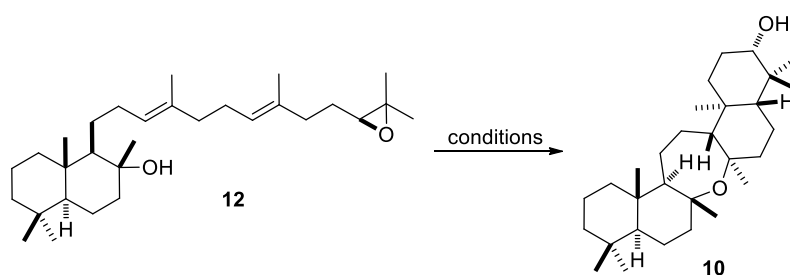

| Entry | Conditions                                                                                                  | Concentration (mmol/mL) | Observation                              |
|-------|-------------------------------------------------------------------------------------------------------------|-------------------------|------------------------------------------|
| 1     | SnCl <sub>4</sub> (1.0 eq.), CH <sub>2</sub> Cl <sub>2</sub> , -78 °C                                       | 0.005                   | Complex mixture                          |
| 2     | SnCl <sub>4</sub> (2.0 eq.), <i>rac</i> -BINOL (2.2 eq.), CH <sub>2</sub> Cl <sub>2</sub> , -78 °C          | 0.002                   | Complex mixture                          |
| 3     | SnCl <sub>4</sub> (2.0 eq.), <i>rac</i> -BINOL (2.2 eq.), CH <sub>2</sub> Cl <sub>2</sub> , -90 °C          | 0.001                   | Incomplete conversion                    |
| 4     | Picric acid (1.8 eq.), MeNO <sub>2</sub> , no stirring, 1 °C                                                | 0.01                    | Complex mixture<br>Incomplete conversion |
| 5     | CSA (0.1 eq.), MeNO <sub>2</sub> , 0 °C                                                                     | 0.005                   | Complex mixture                          |
| 6     | HFIP, 1 °C                                                                                                  | 0.003                   | Incomplete conversion                    |
| 7     | HFIP, TFA (0.05 eq.), CH <sub>2</sub> Cl <sub>2</sub> , 1 °C                                                | 0.003                   | Complex mixture<br>Incomplete conversion |
| 8     | HFIP, Ph <sub>4</sub> PBF <sub>4</sub> (10 eq.), 1 °C                                                       | 0.001                   | Complex mixture                          |
| 9     | HFIP, NaSbF <sub>6</sub> (10 eq.), 1 °C                                                                     | 0.003                   | Complex mixture                          |
| 10    | HFIP, AgSbF <sub>6</sub> (10 eq.), 1 °C                                                                     | 0.003                   | Complex mixture                          |
| 11    | HFIP, Bu <sub>4</sub> NPF <sub>6</sub> (10 eq.), 1 °C                                                       | 0.003                   | Complex mixture                          |
| 12    | BF <sub>3</sub> •OEt <sub>2</sub> (2.3 eq.), CH <sub>2</sub> Cl <sub>2</sub> , -78 °C                       | 0.005                   | Complex mixture                          |
| 13    | Cp <sub>2</sub> TiCl <sub>2</sub> (2.2 eq.), Mn (100 eq.), THF, rt                                          | 0.005                   | Complex mixture                          |
| 14    | Cp <sub>2</sub> TiCl <sub>2</sub> (0.55 eq.), Mn (24 eq.), TMSCl (8 eq.), 2,4,6-collidine (14 eq.), THF, rt | 0.005                   | Complex mixture                          |
| 14    | TIPSOTf (5.0 eq.), 2,6-lutidine, CH <sub>2</sub> Cl <sub>2</sub> , -78 °C to rt                             | 0.0015                  | Complex mixture<br>Incomplete conversion |
| 15    | InCl <sub>3</sub> (1.0 eq.), CH <sub>2</sub> Cl <sub>2</sub> , -78 °C to rt                                 | 0.005                   | Complex mixture                          |
| 16    | Me <sub>2</sub> AlCl (3.0 eq.), CH <sub>2</sub> Cl <sub>2</sub> , -78 °C <sup>a</sup>                       | 0.001                   | Incomplete conversion                    |
| 17    | Et <sub>2</sub> AlCl (3.0 eq.), CH <sub>2</sub> Cl <sub>2</sub> , -78 °C <sup>a</sup>                       | 0.001                   | Incomplete conversion                    |
| 18    | MeAlCl <sub>2</sub> (3.0 eq.), CH <sub>2</sub> Cl <sub>2</sub> , Et <sub>2</sub> O, -78 °C <sup>a</sup>     | 0.001                   | Complex mixture                          |
| 19    | EtAlCl <sub>2</sub> (2.0 eq.), CH <sub>2</sub> Cl <sub>2</sub> , -78 °C <sup>a,b</sup>                      | 0.001                   | 14% <b>10</b> , 8% <b>21</b>             |

|    |                                                                                         |        |                                                         |
|----|-----------------------------------------------------------------------------------------|--------|---------------------------------------------------------|
| 20 | EtAlCl <sub>2</sub> (3.0 eq.), CH <sub>2</sub> Cl <sub>2</sub> ,<br>−78 °C <sup>a</sup> | 0.001  | 20% <b>10</b> , 12% <b>21</b>                           |
| 21 | EtAlCl <sub>2</sub> (3.0 eq.), CH <sub>2</sub> Cl <sub>2</sub> ,<br>−78 °C <sup>a</sup> | 0.0005 | 17% <b>10</b> , 16% <b>21</b>                           |
| 22 | EtAlCl <sub>2</sub> (3.0 eq.), CH <sub>2</sub> Cl <sub>2</sub> ,<br>−90 °C <sup>a</sup> | 0.001  | Complex mixture                                         |
| 23 | EtAlCl <sub>2</sub> (5.0 eq.), CH <sub>2</sub> Cl <sub>2</sub> ,<br>−78 °C <sup>a</sup> | 0.001  | Complex mixture;<br>trace product<br>formation detected |
| 24 | EtAlCl <sub>2</sub> (3.0 eq.), CH <sub>2</sub> Cl <sub>2</sub> ,<br>−78 °C <sup>c</sup> | 0.001  | Complex mixture                                         |

<sup>a</sup> Substrate in CH<sub>2</sub>Cl<sub>2</sub> (precooled by passing the needle through dry ice) was added to a solution of Lewis acid in CH<sub>2</sub>Cl<sub>2</sub> at −78 °C.

<sup>b</sup> No tricyclization product was obtained if the corresponding trimethylsilyl ether (OTMS) was used under the same conditions as starting material instead of the tertiary alcohol.

<sup>c</sup> EtAlCl<sub>2</sub> in CH<sub>2</sub>Cl<sub>2</sub> (precooled by passing the needle through dry ice) was added to a solution of substrate in CH<sub>2</sub>Cl<sub>2</sub> at −78 °C.

Note: No signals corresponding to **S6** were observed in <sup>1</sup>H-NMR analysis of the crude reaction mixture.

## 4. NMR Spectra

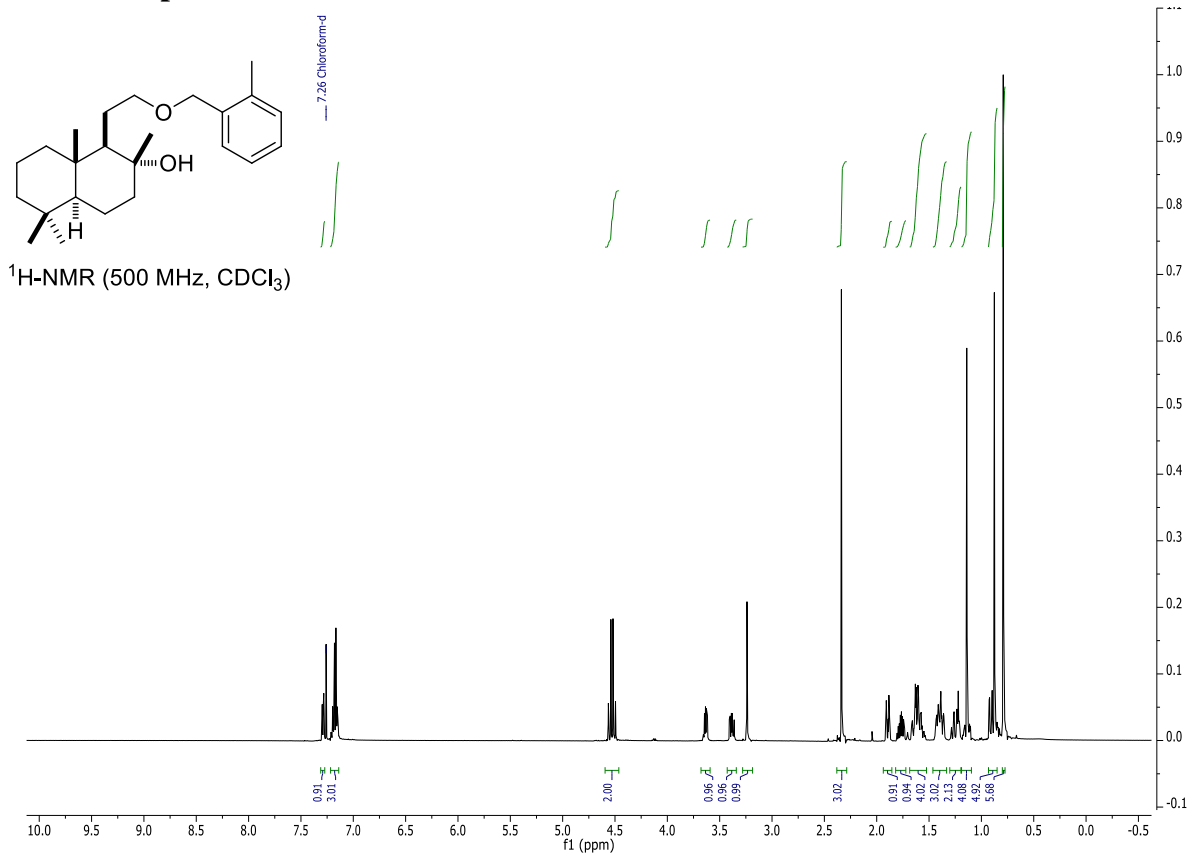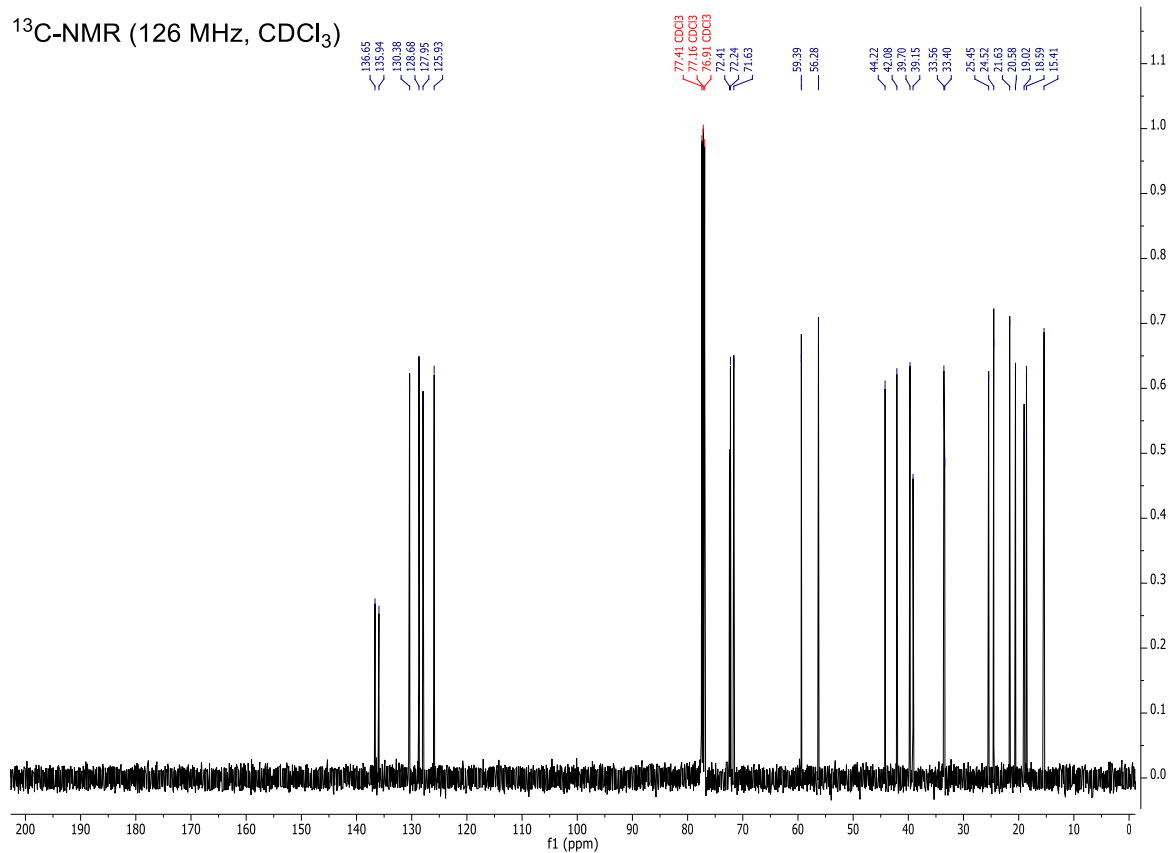

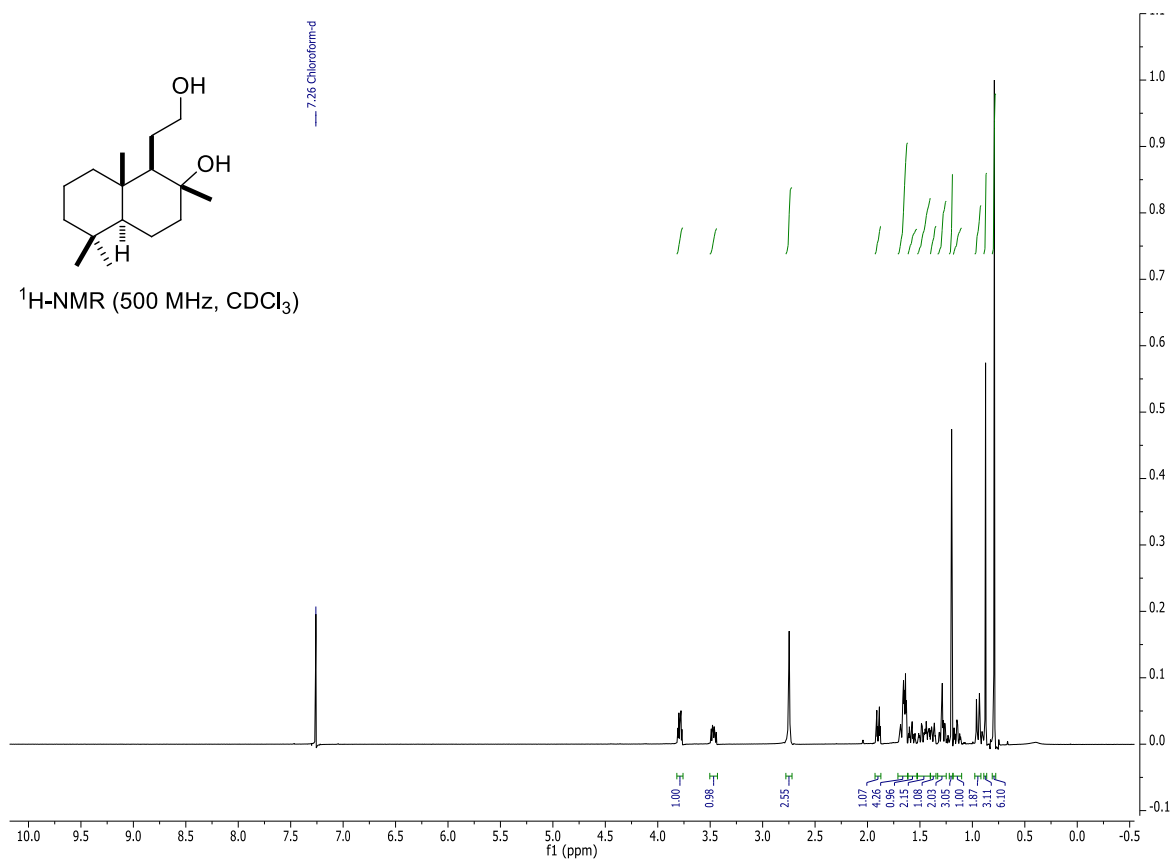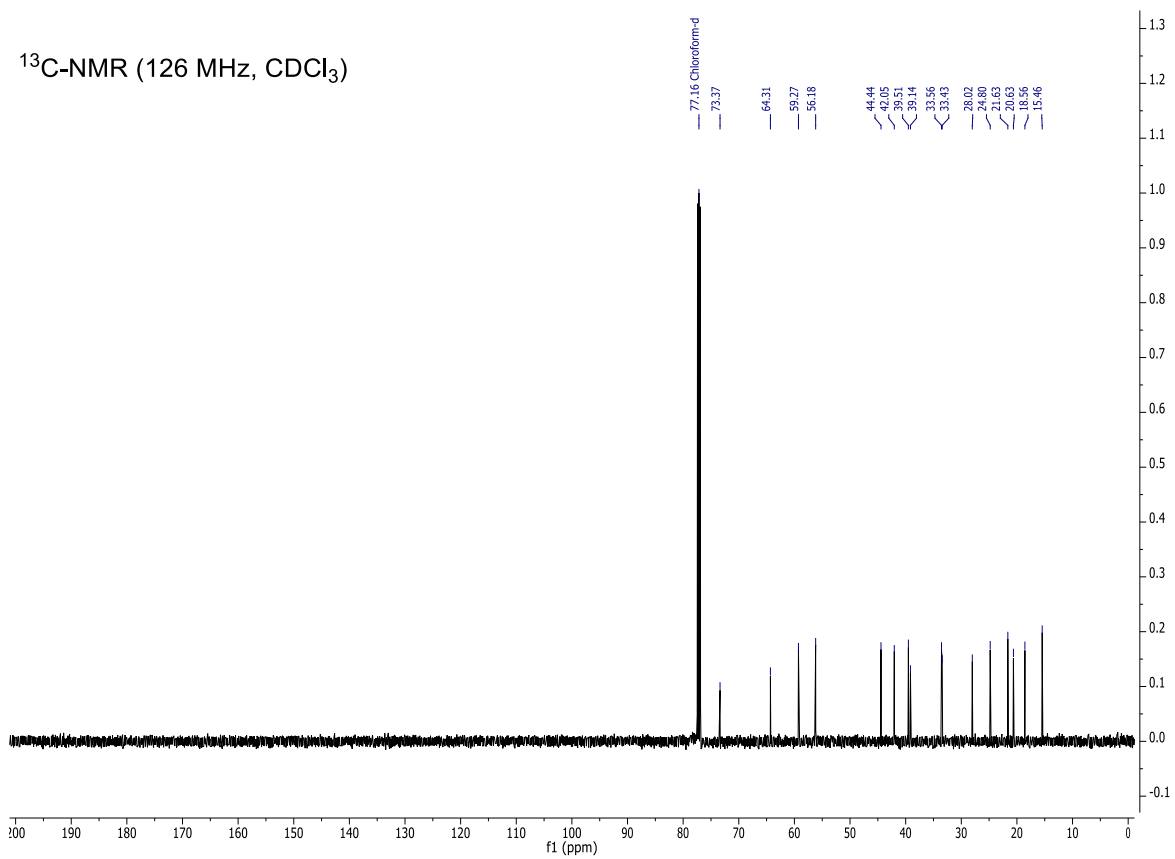

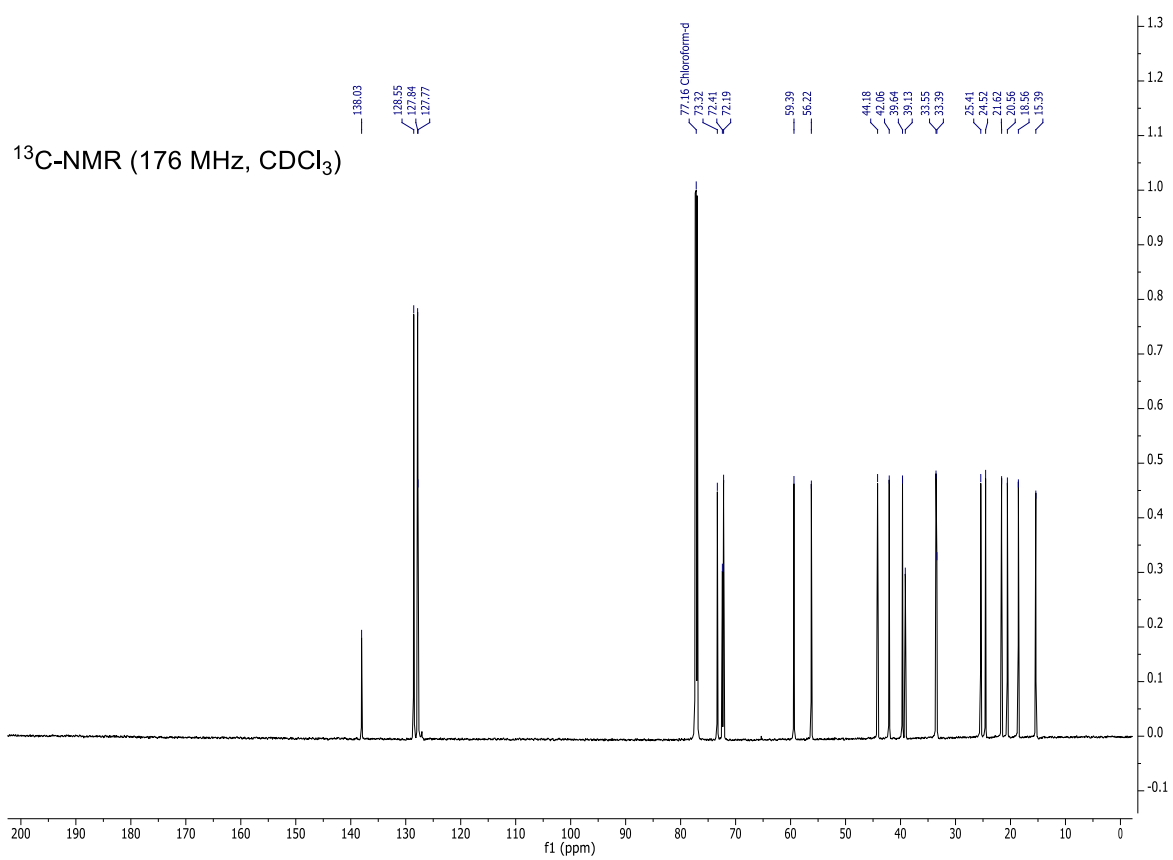

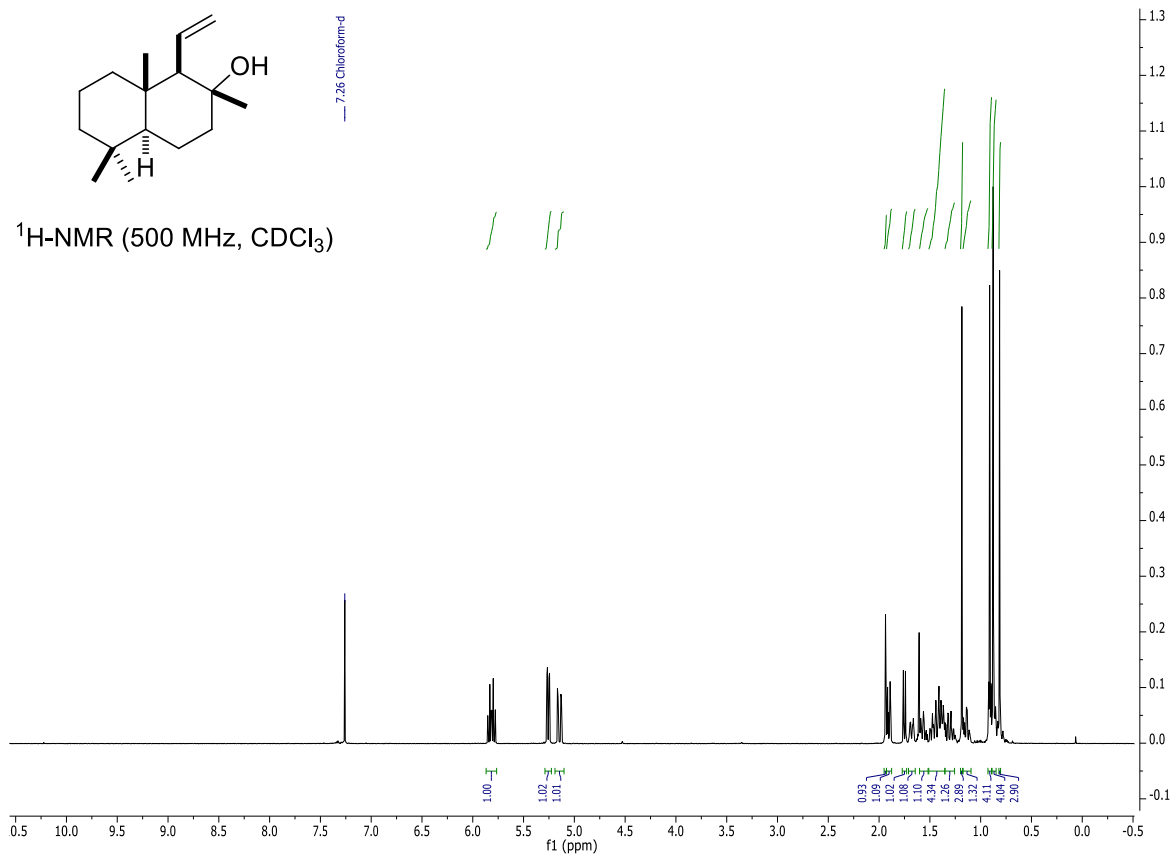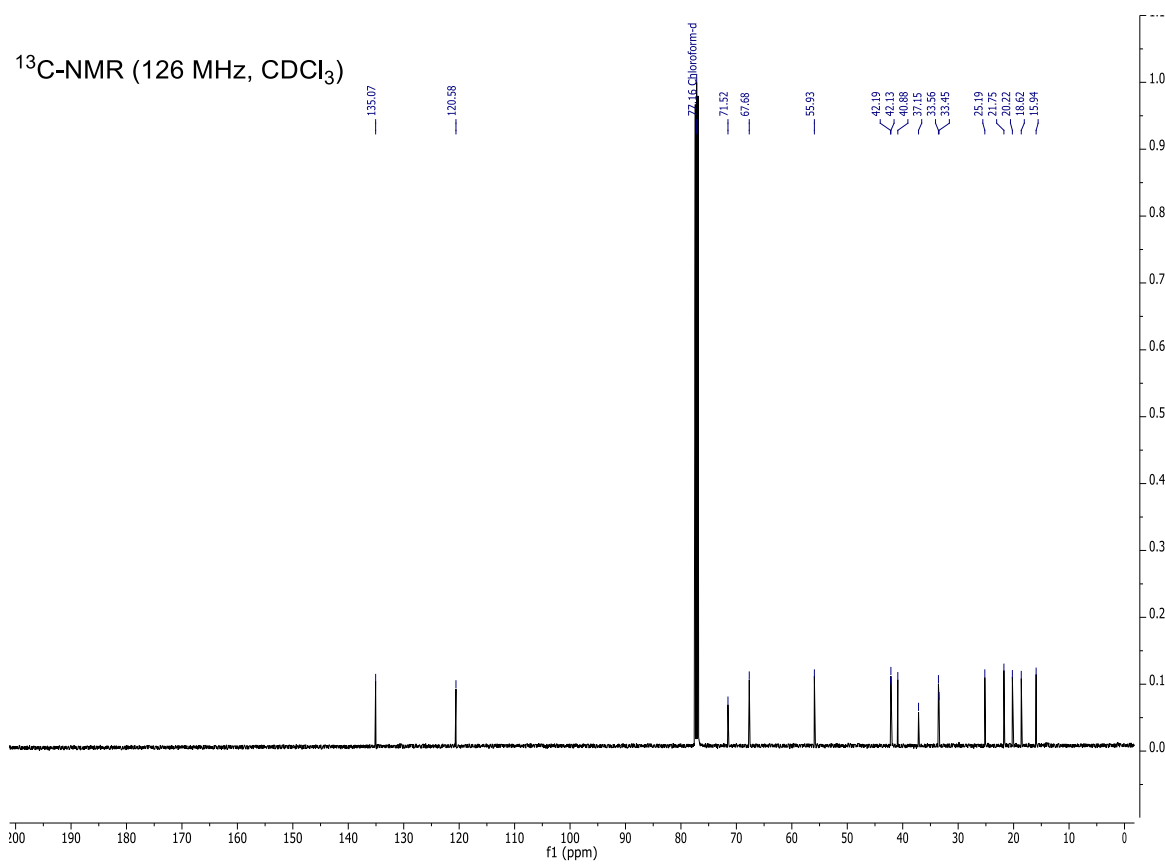

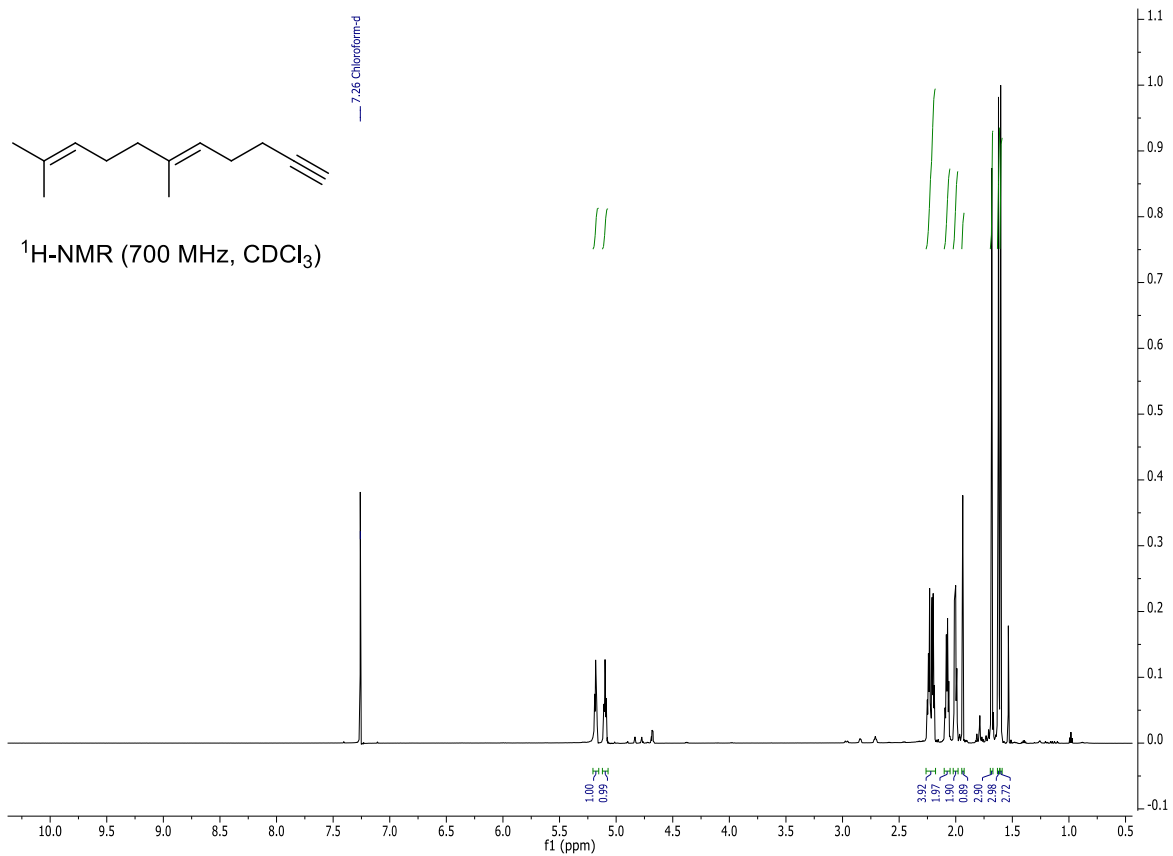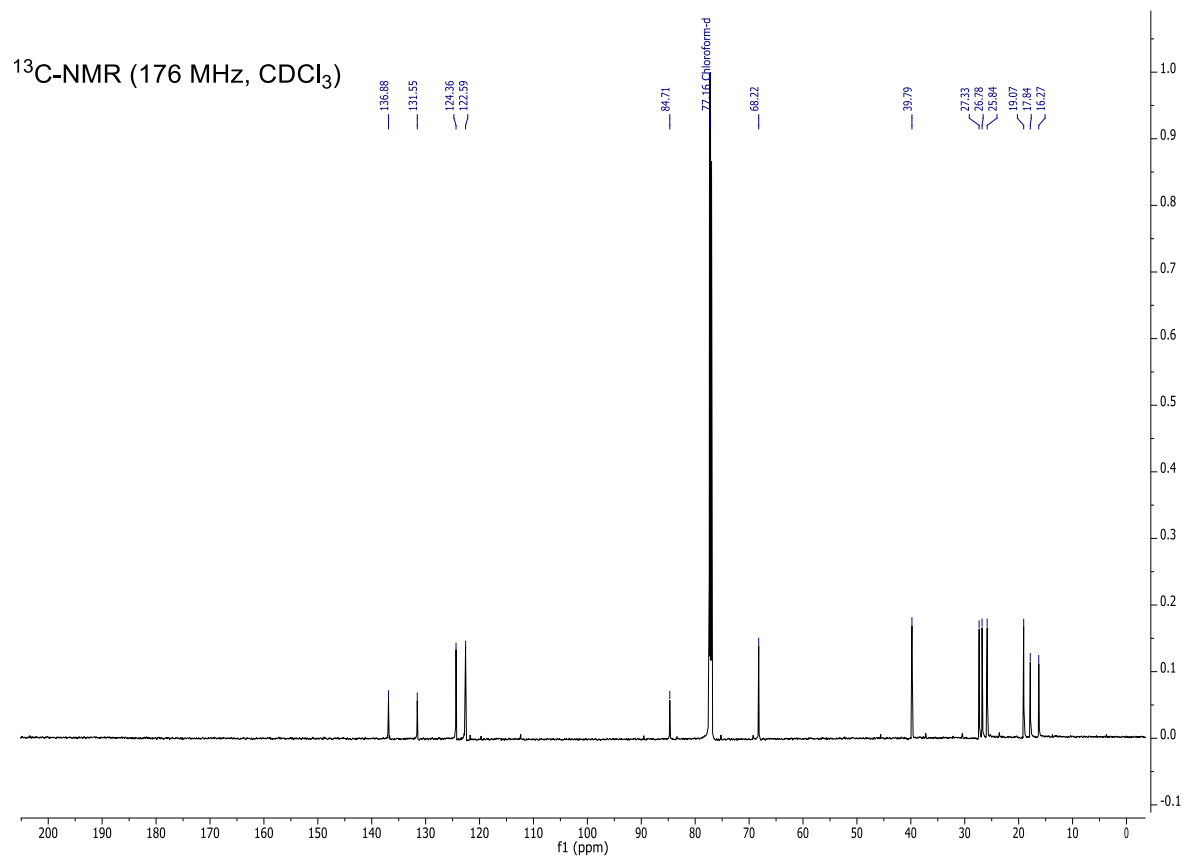

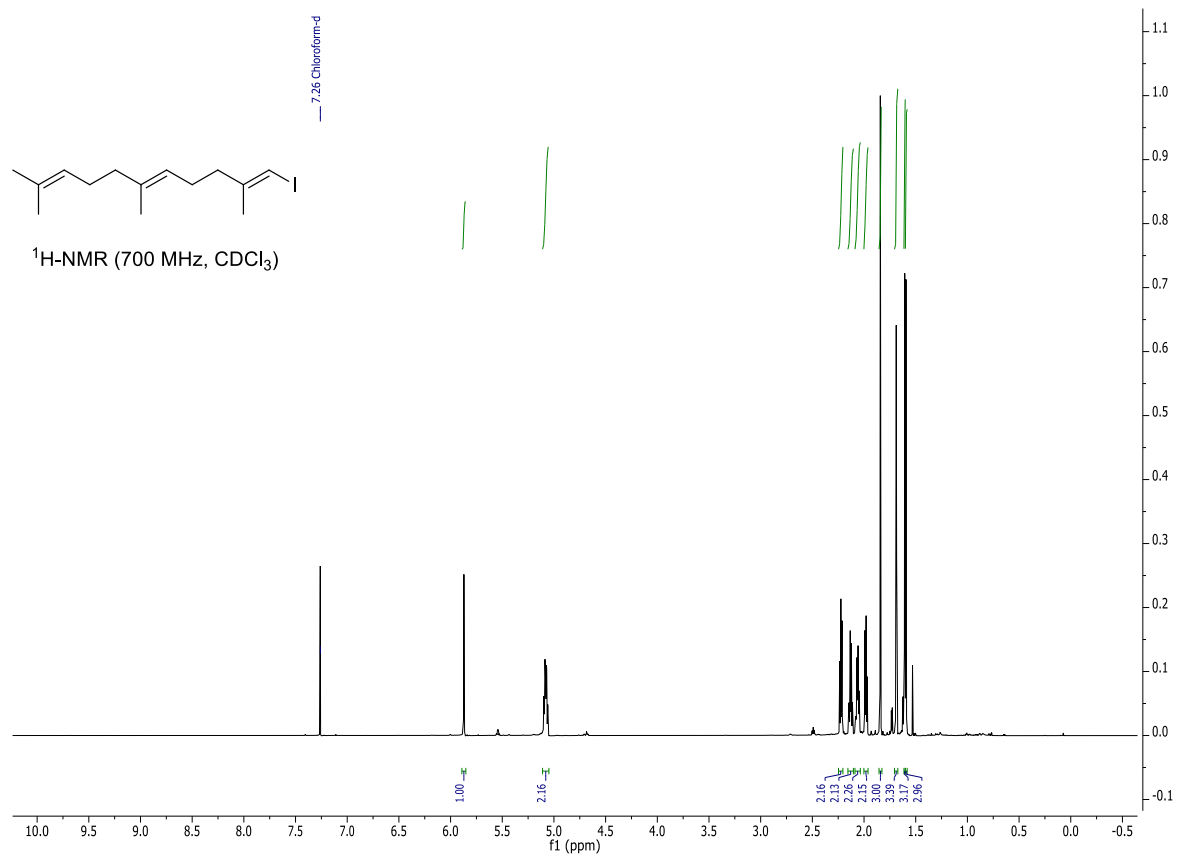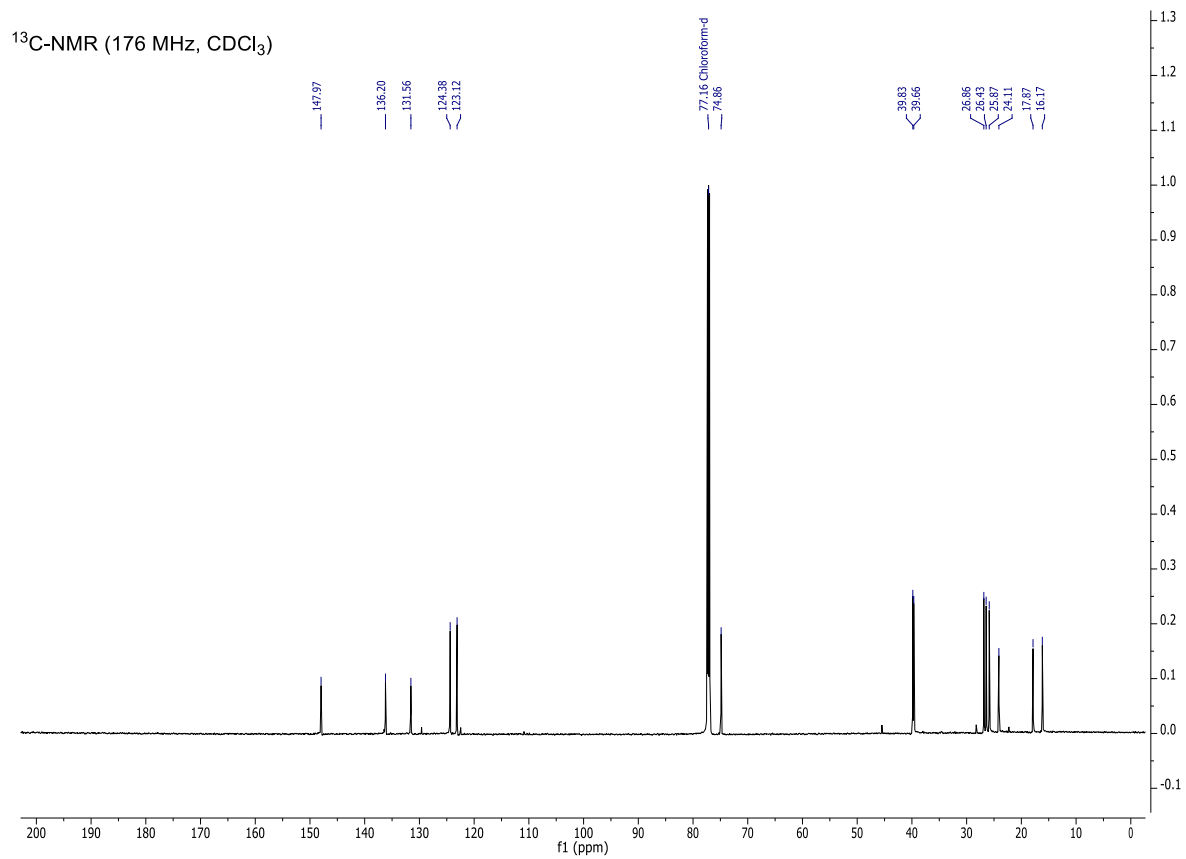

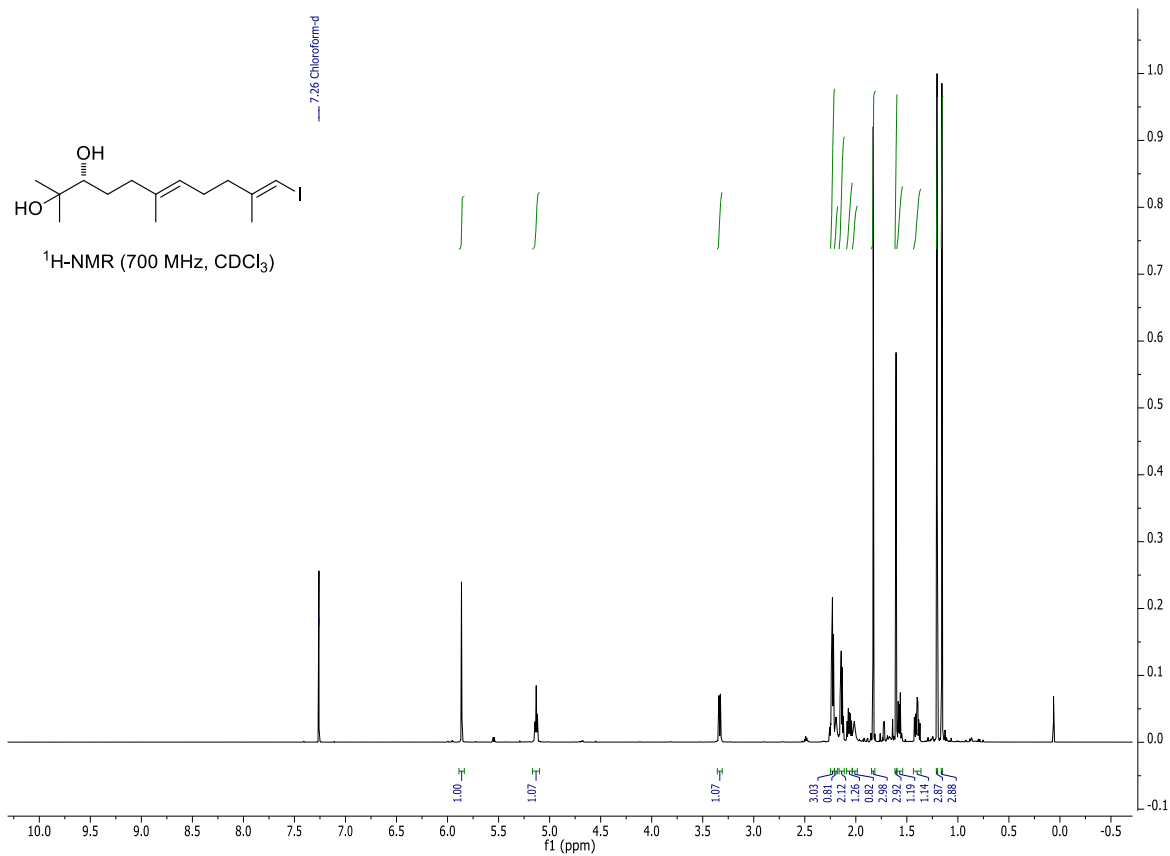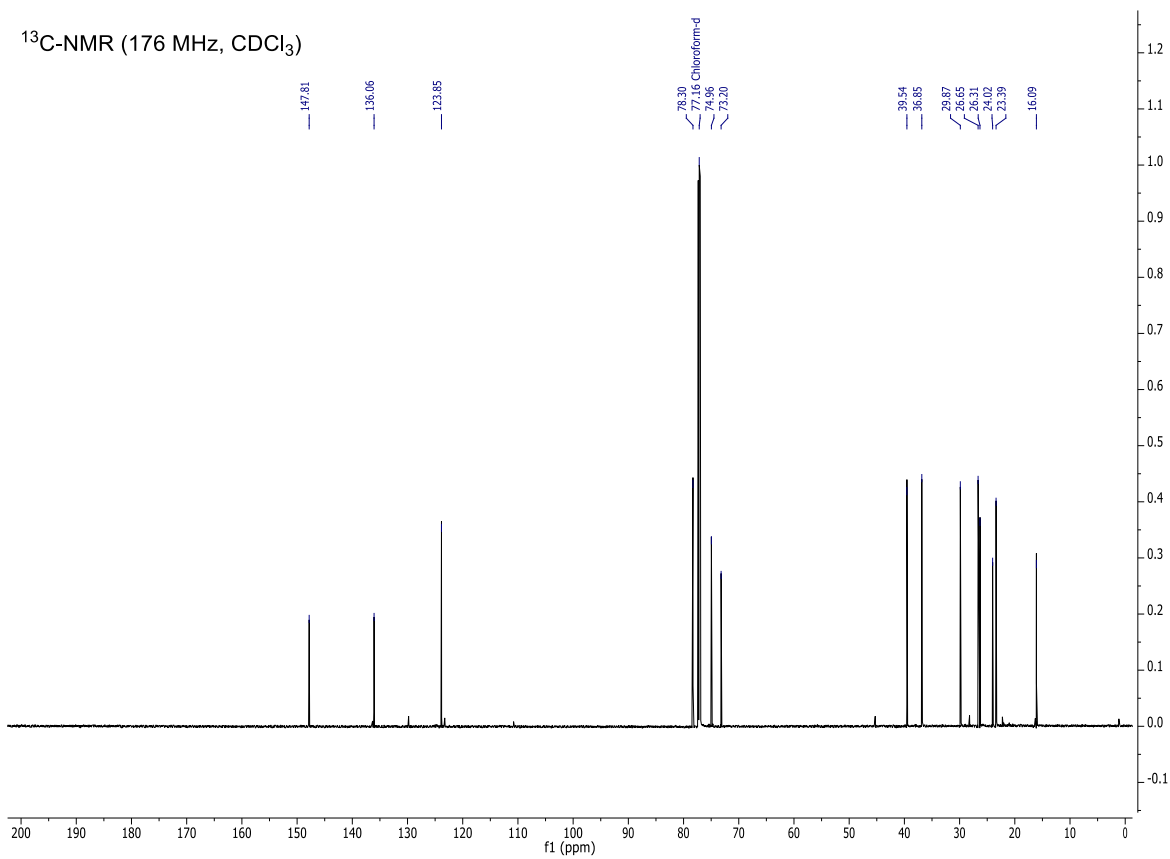

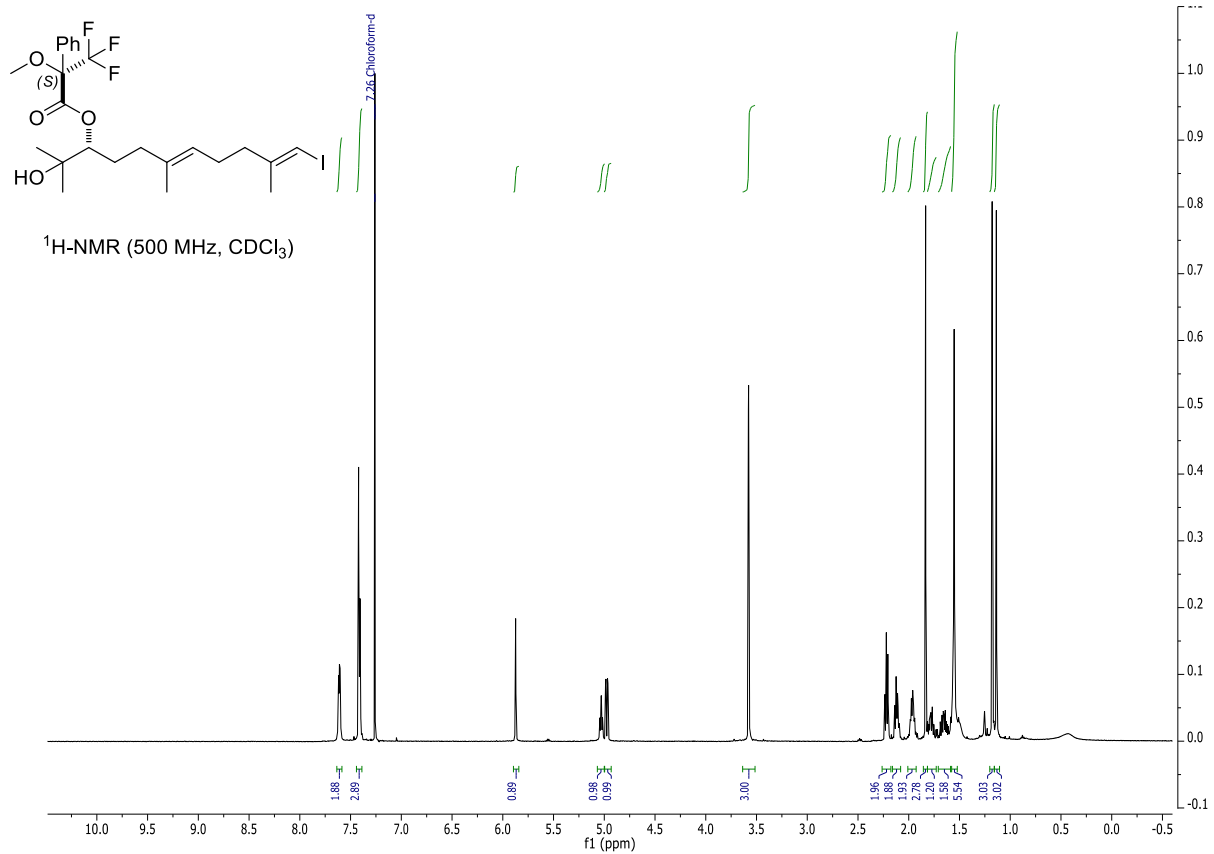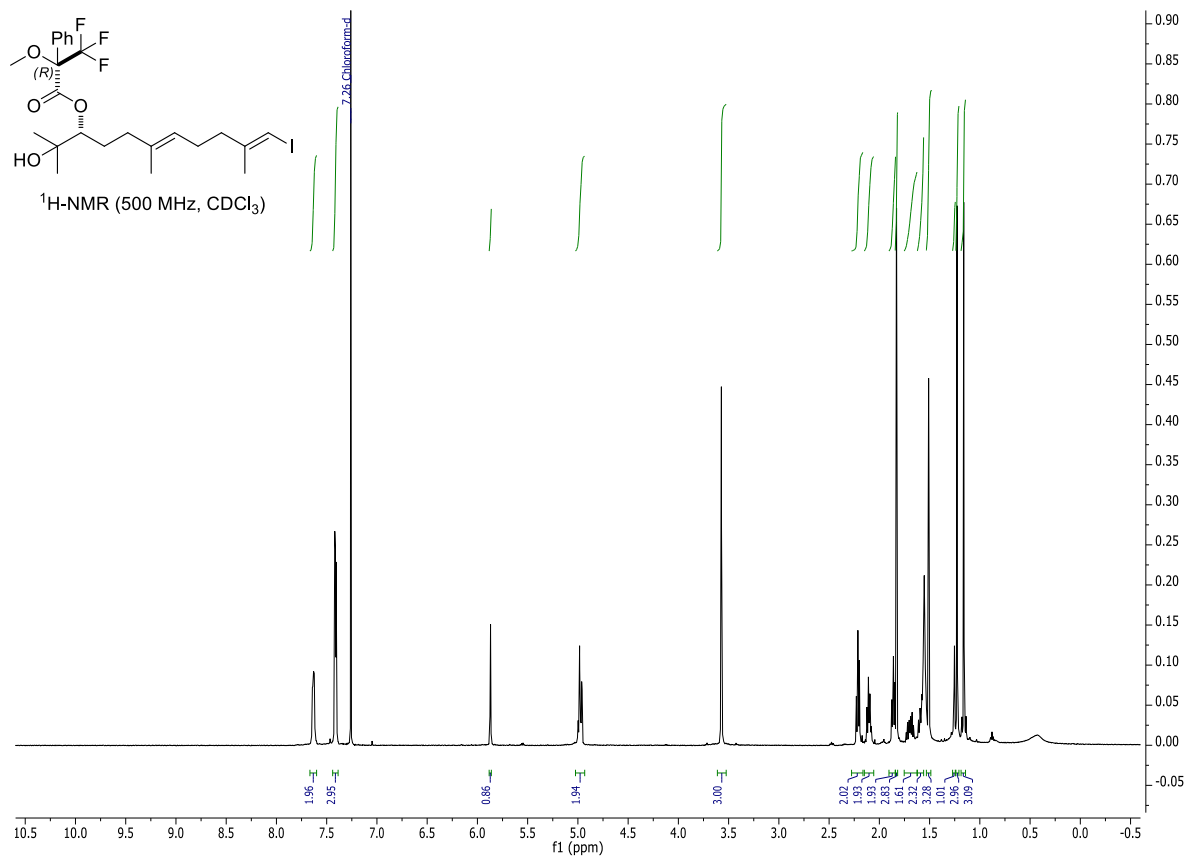

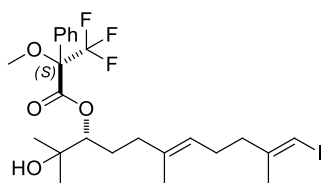

$^1\text{H}$ - $^1\text{H}$ -COSY (700 MHz,  $\text{CDCl}_3$ )

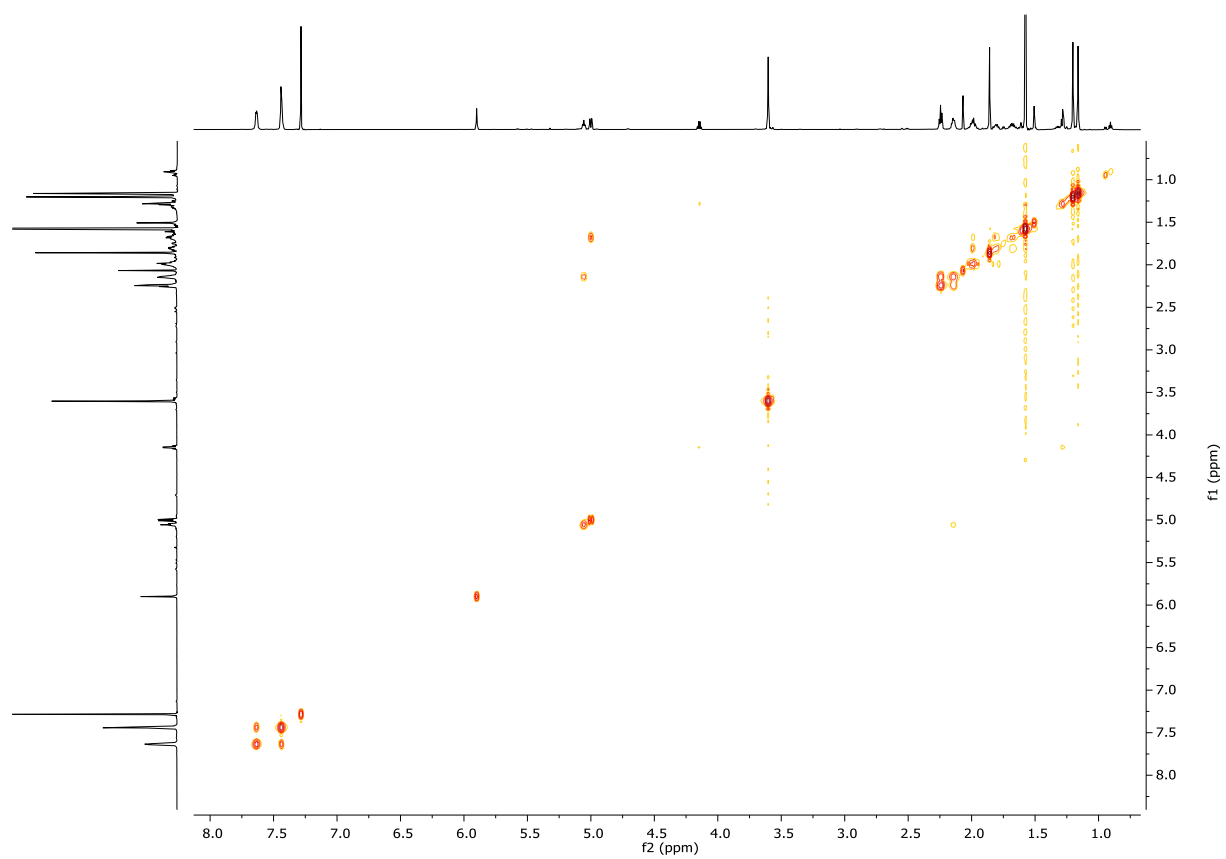

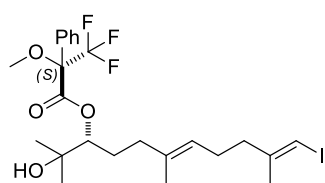

HMQC (700 MHz, CDCl<sub>3</sub>)

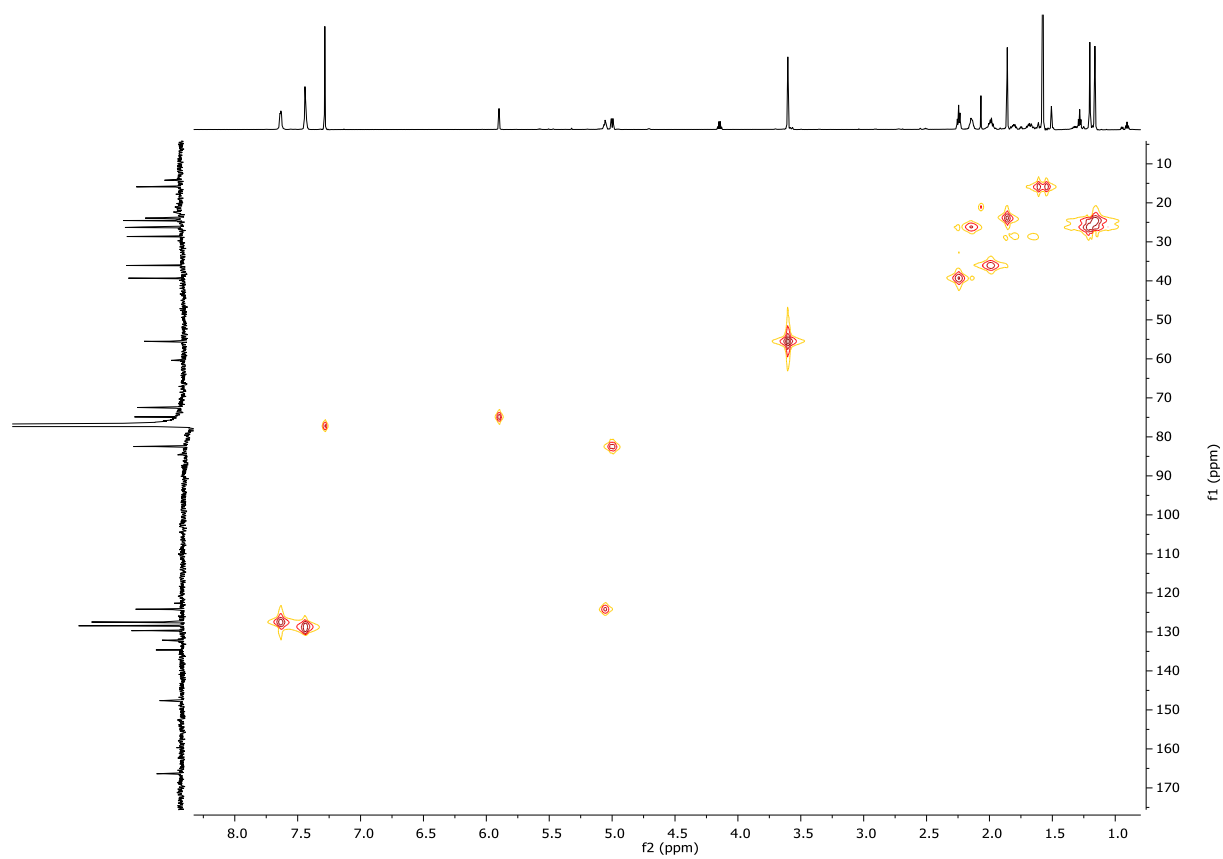

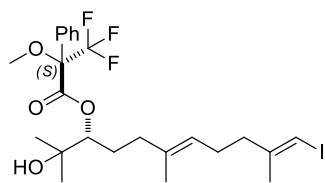

HMBC (700 MHz, CDCl<sub>3</sub>)

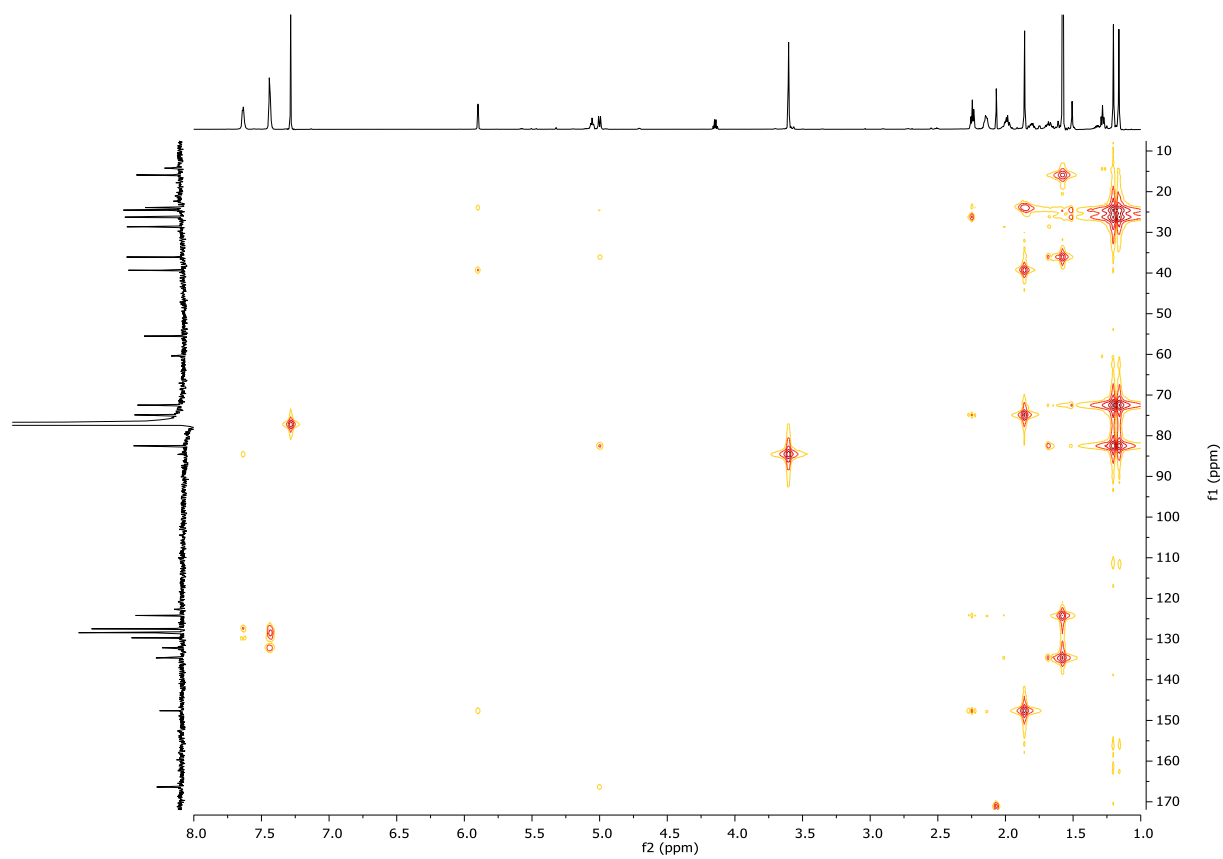

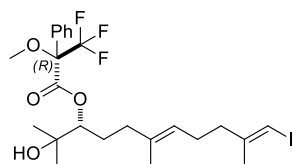

$^1\text{H}$ - $^1\text{H}$ -COSY (700 MHz,  $\text{CDCl}_3$ )

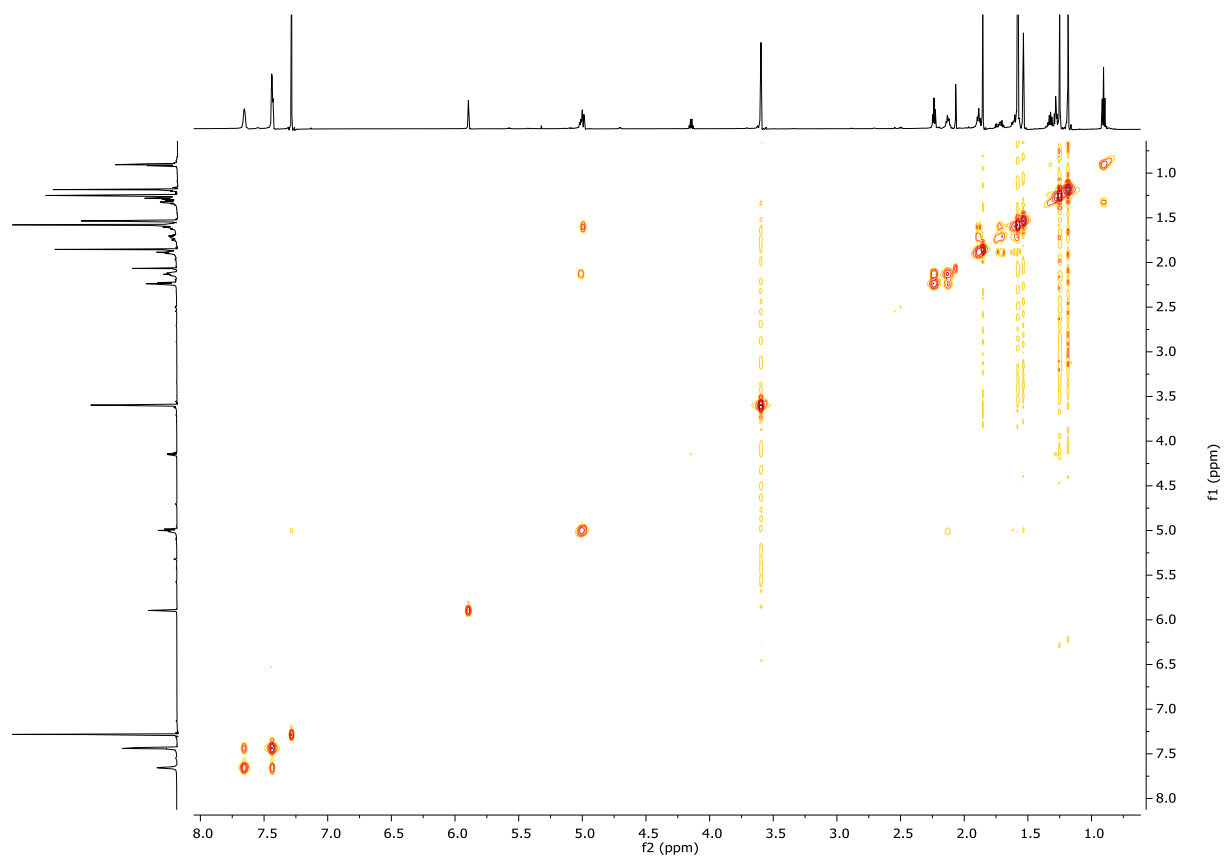

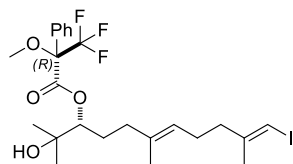

HMQC (700 MHz,  $\text{CDCl}_3$ )

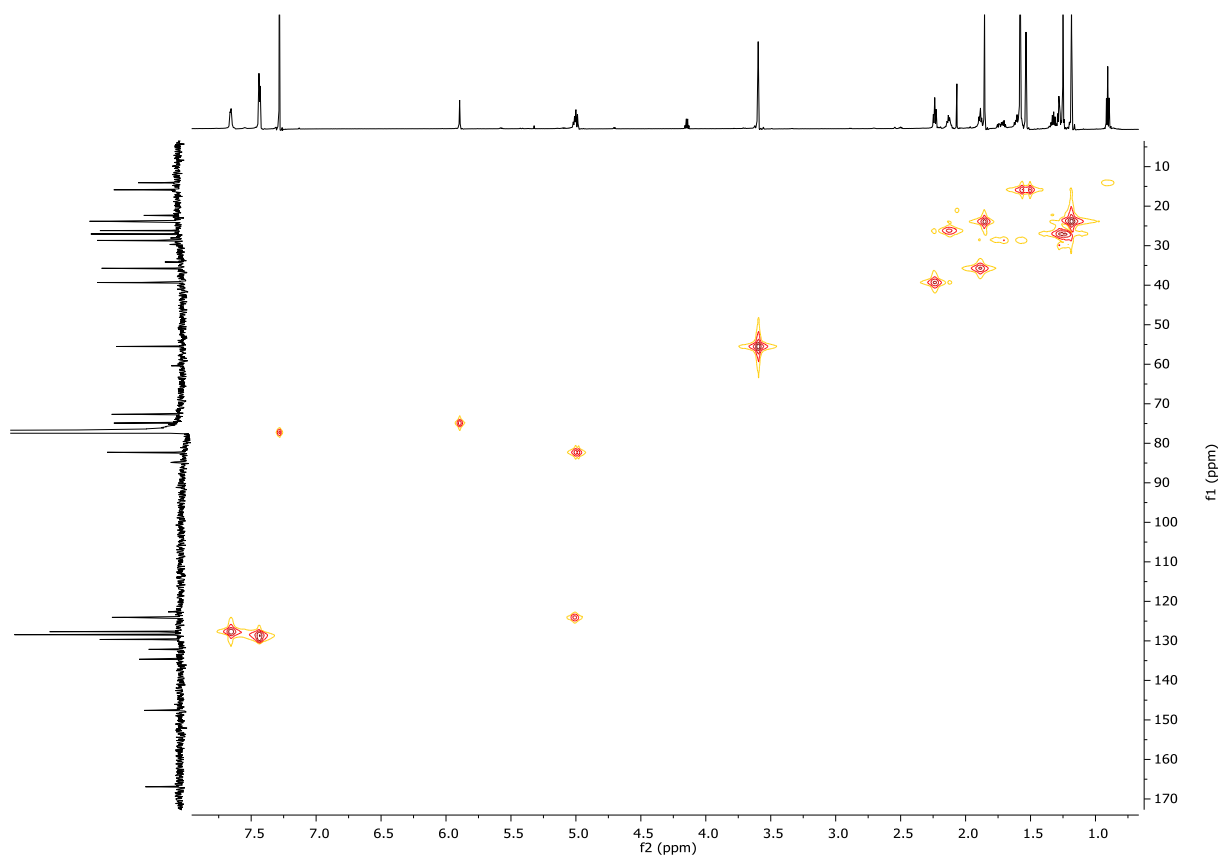

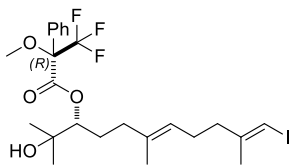

HMBC (700 MHz, CDCl<sub>3</sub>)

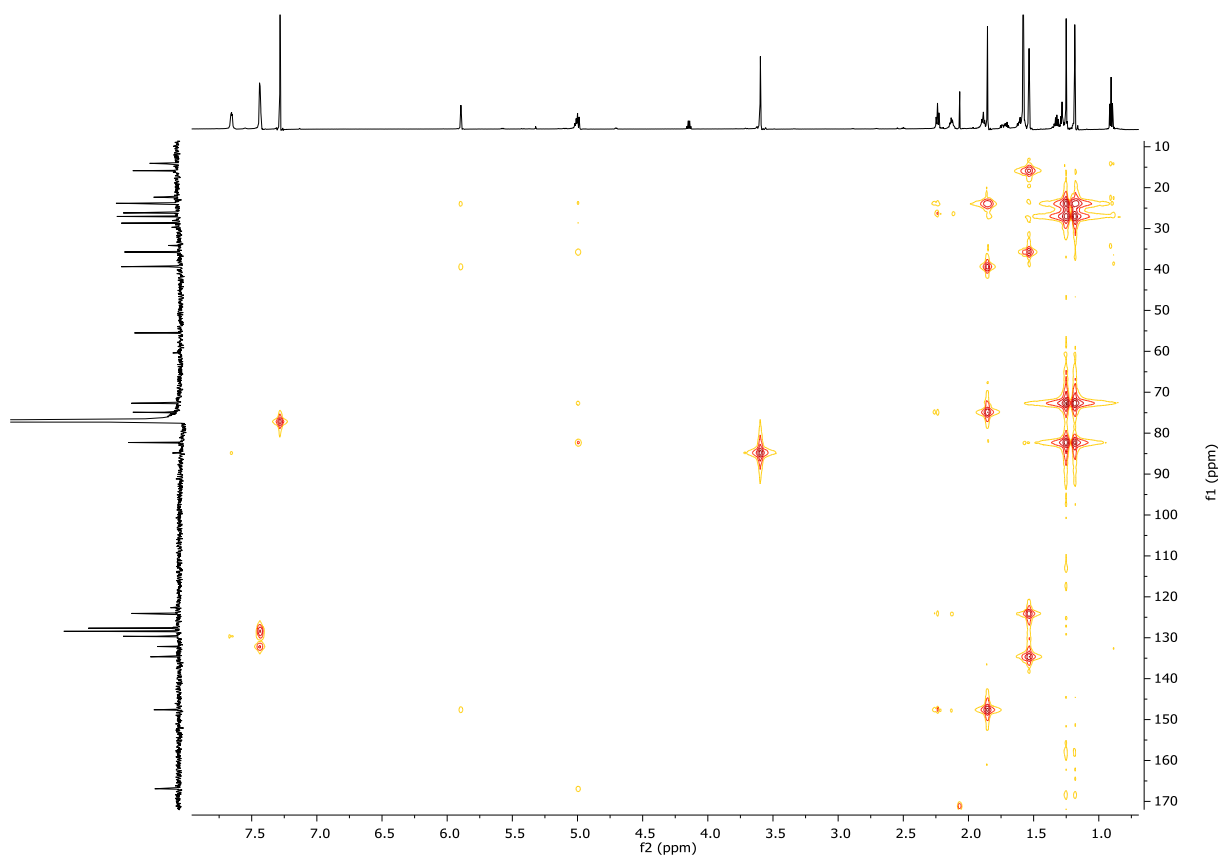

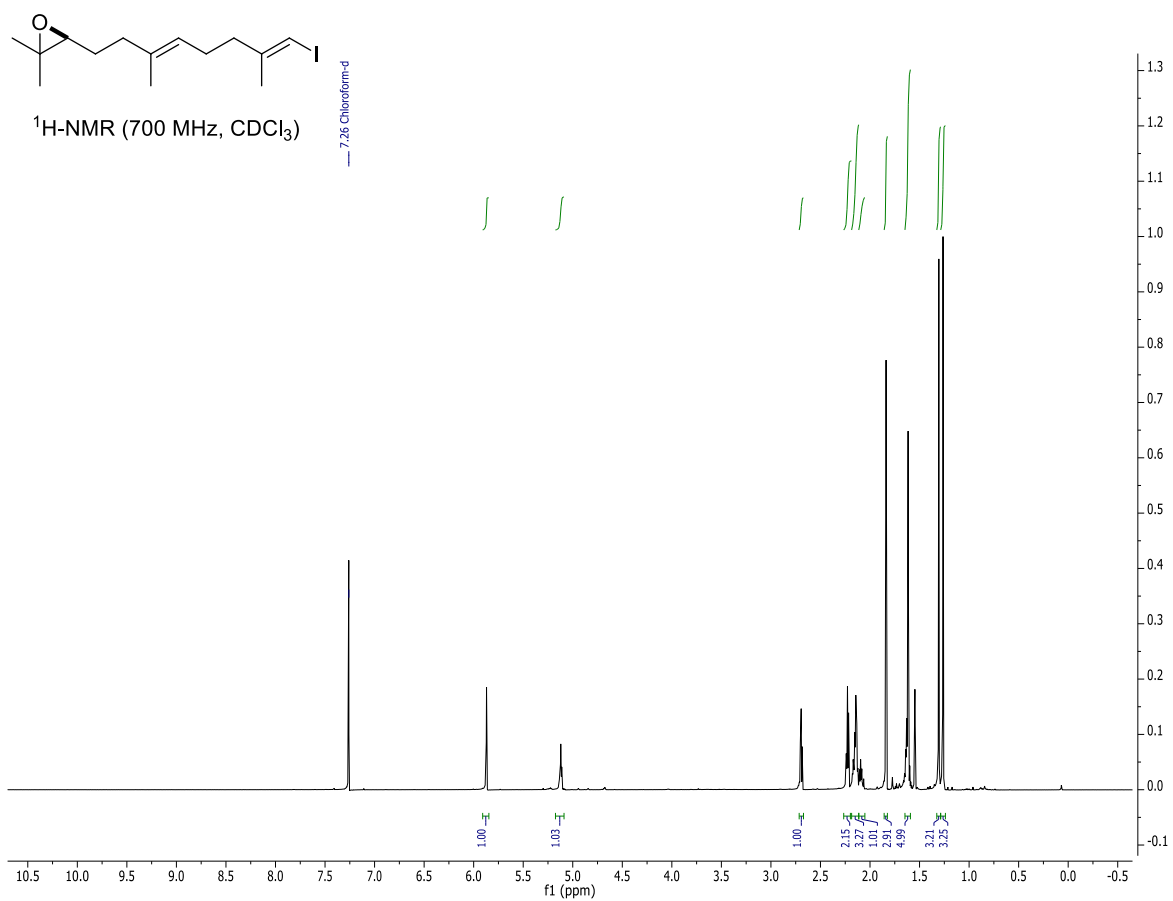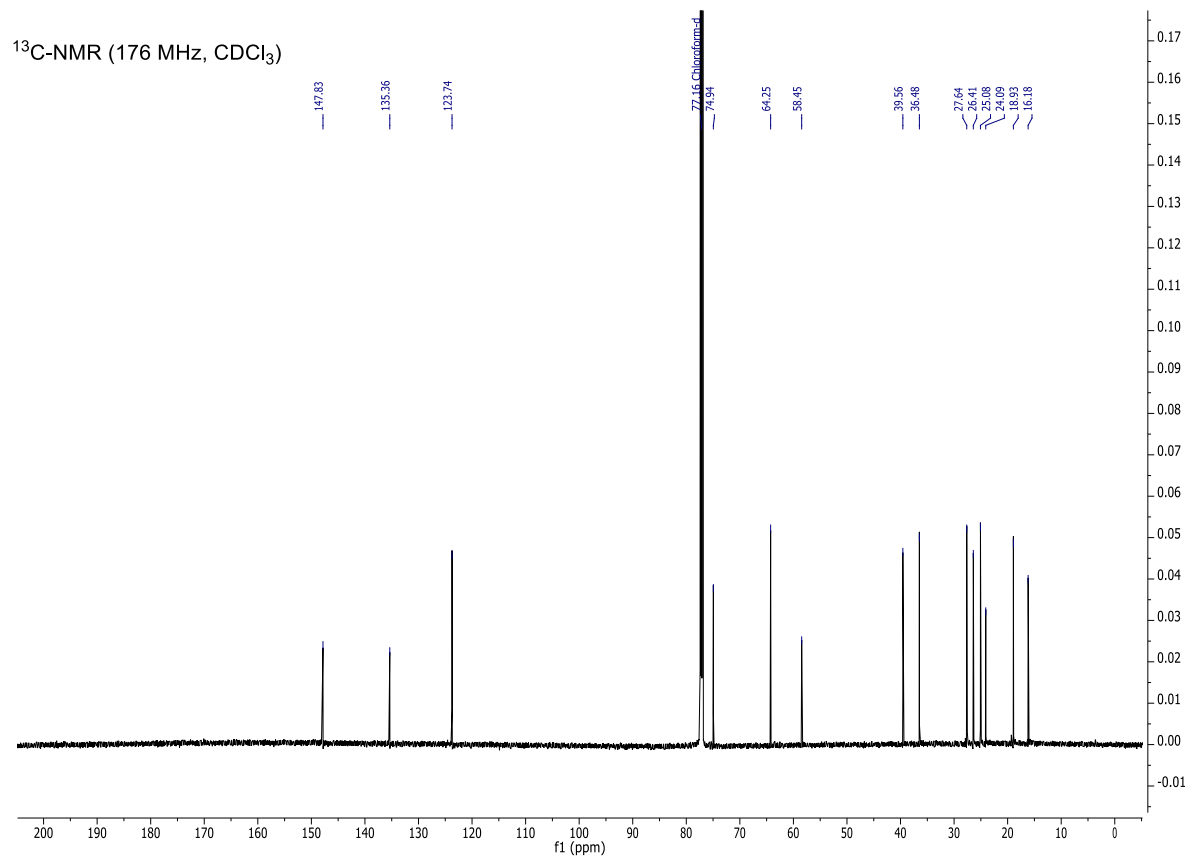

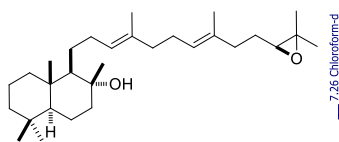

$^1\text{H-NMR}$  (700 MHz,  $\text{CDCl}_3$ )

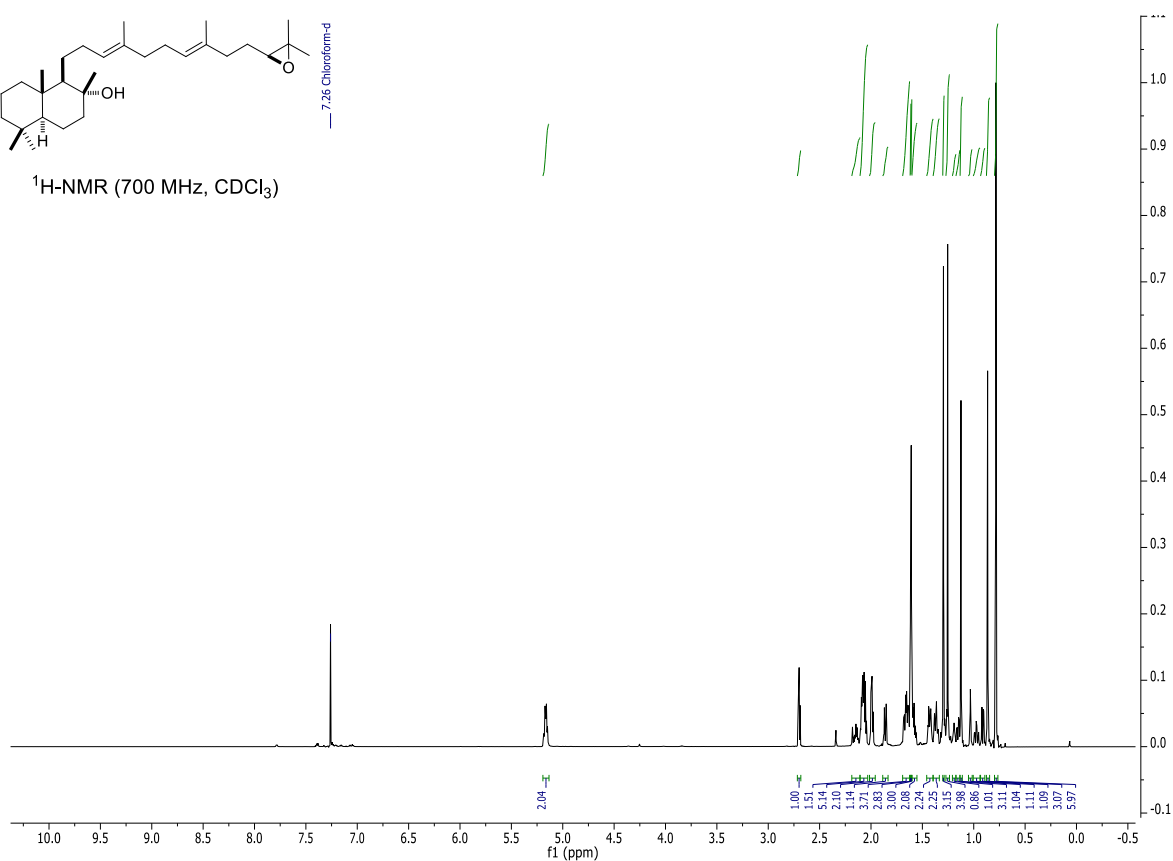

$^{13}\text{C-NMR}$  (176 MHz,  $\text{CDCl}_3$ )

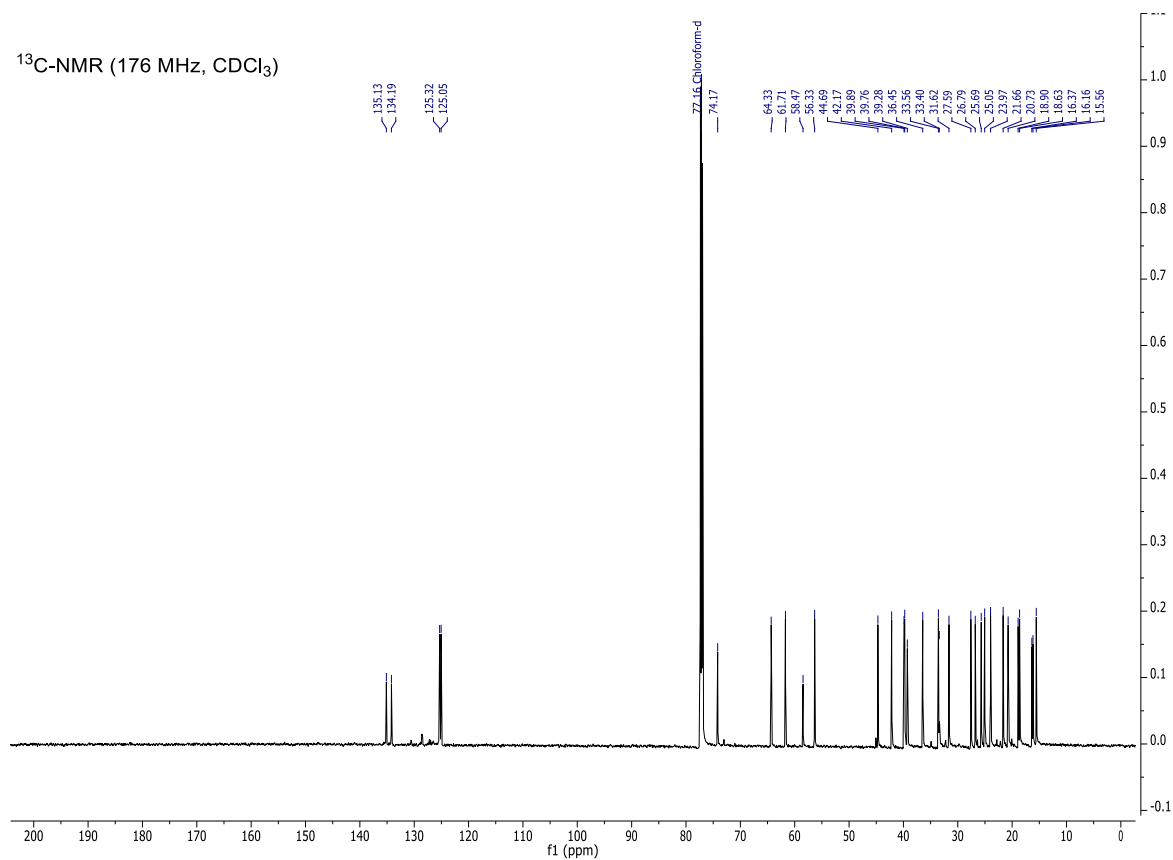

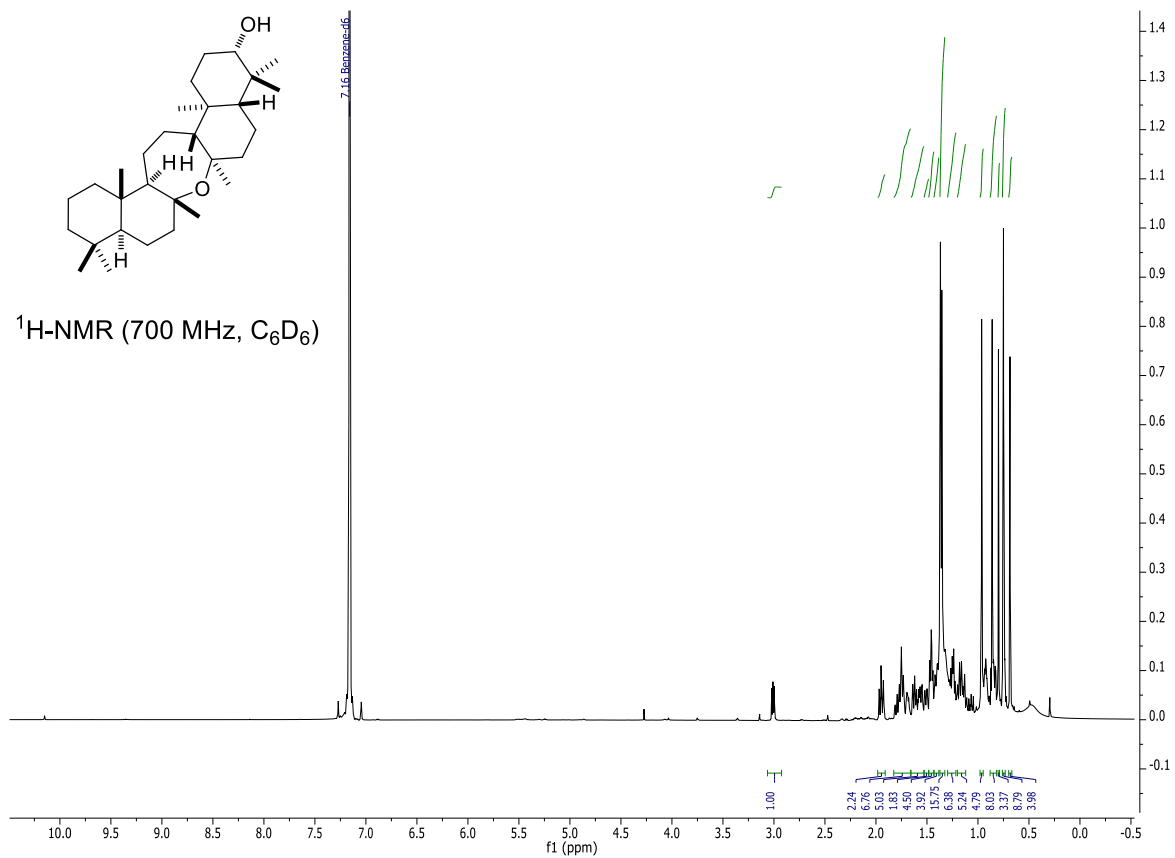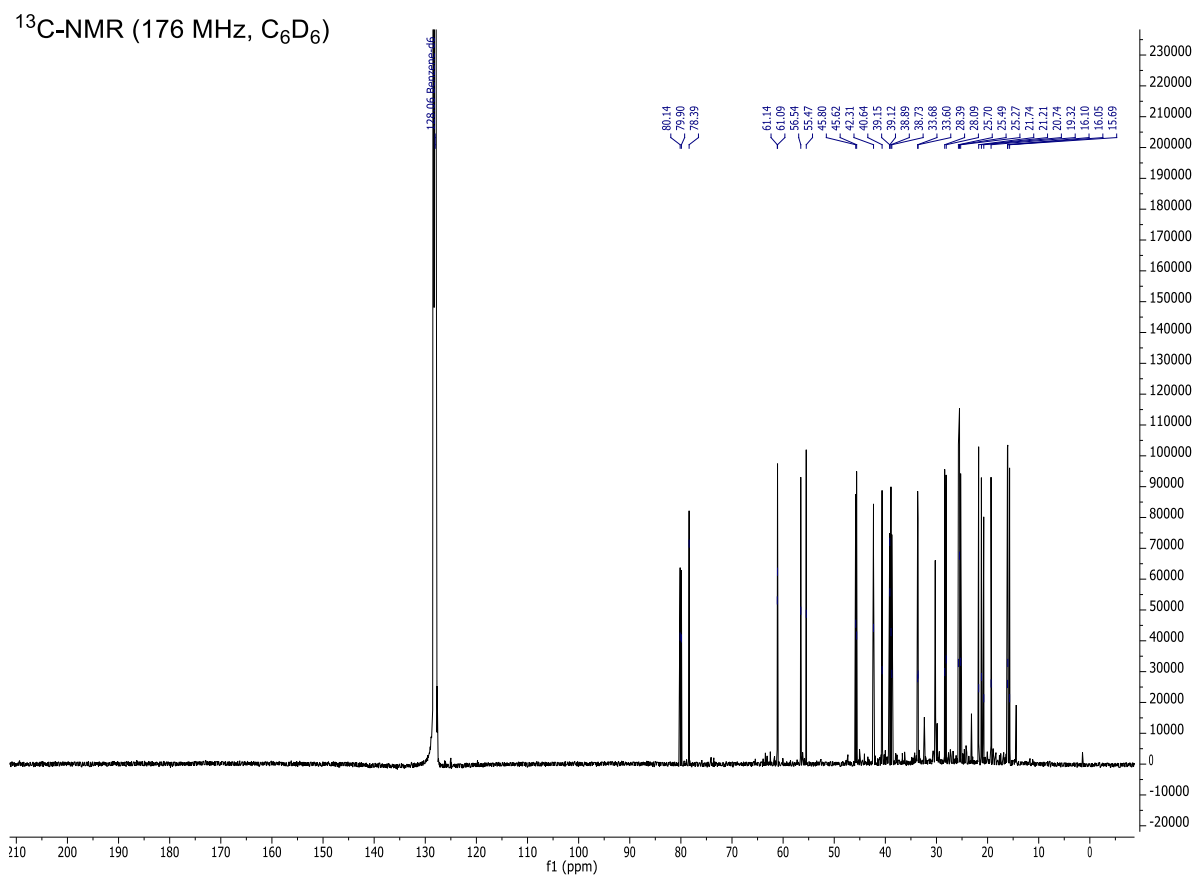

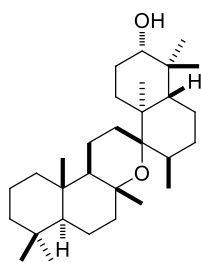

$^1\text{H-NMR}$  (700 MHz,  $\text{C}_6\text{D}_6$ )

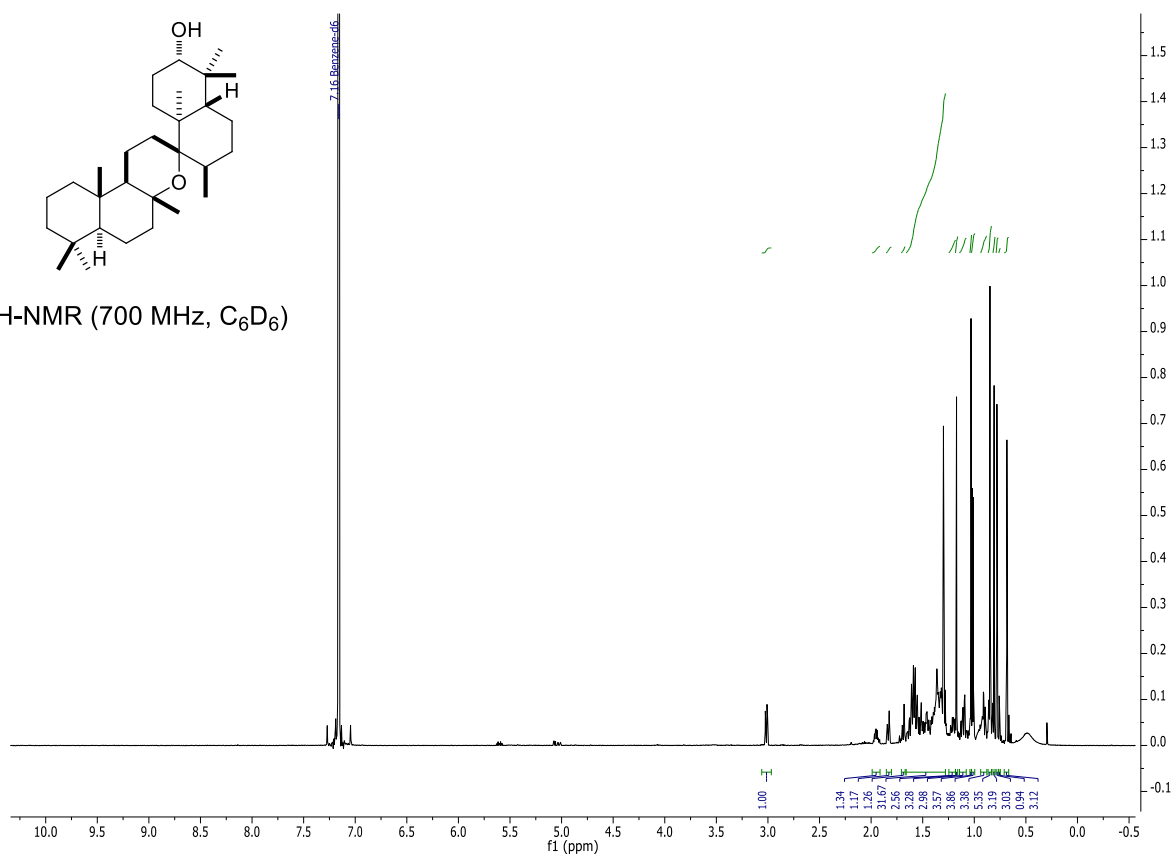

$^{13}\text{C-NMR}$  (176 MHz,  $\text{C}_6\text{D}_6$ )

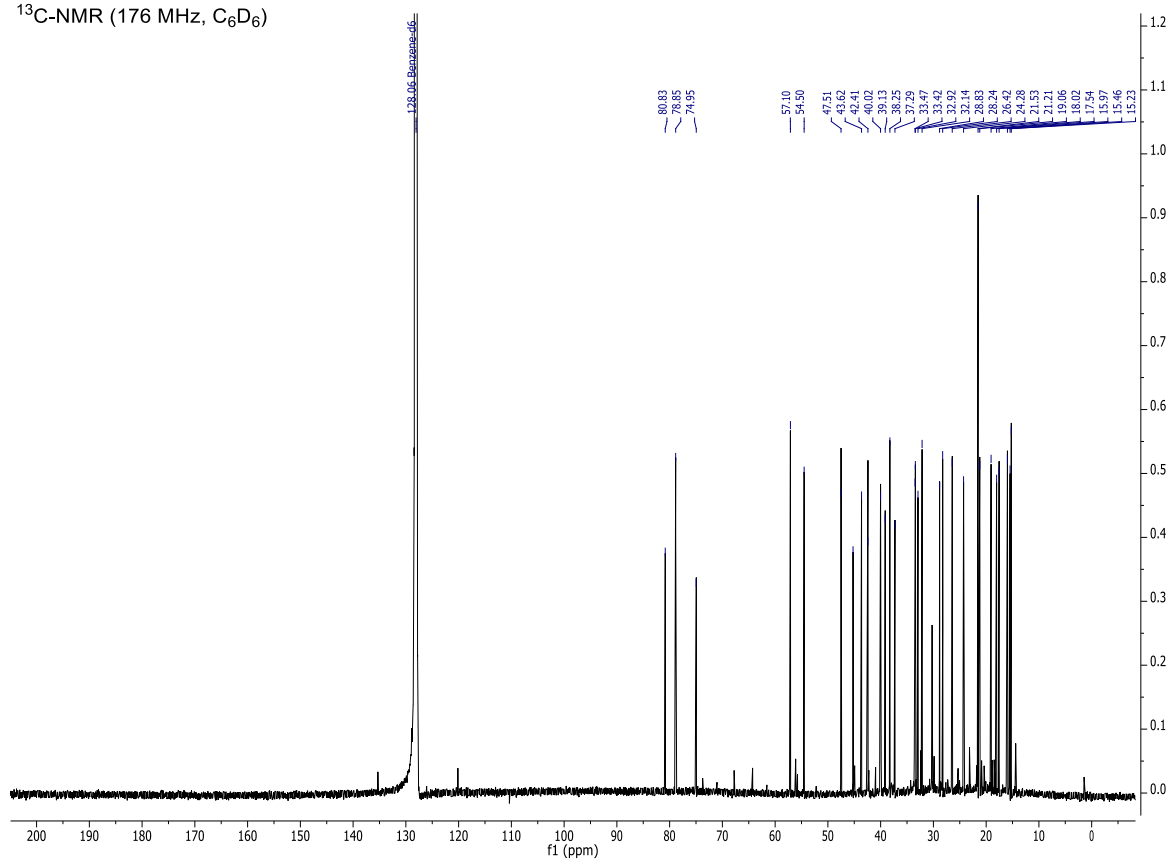

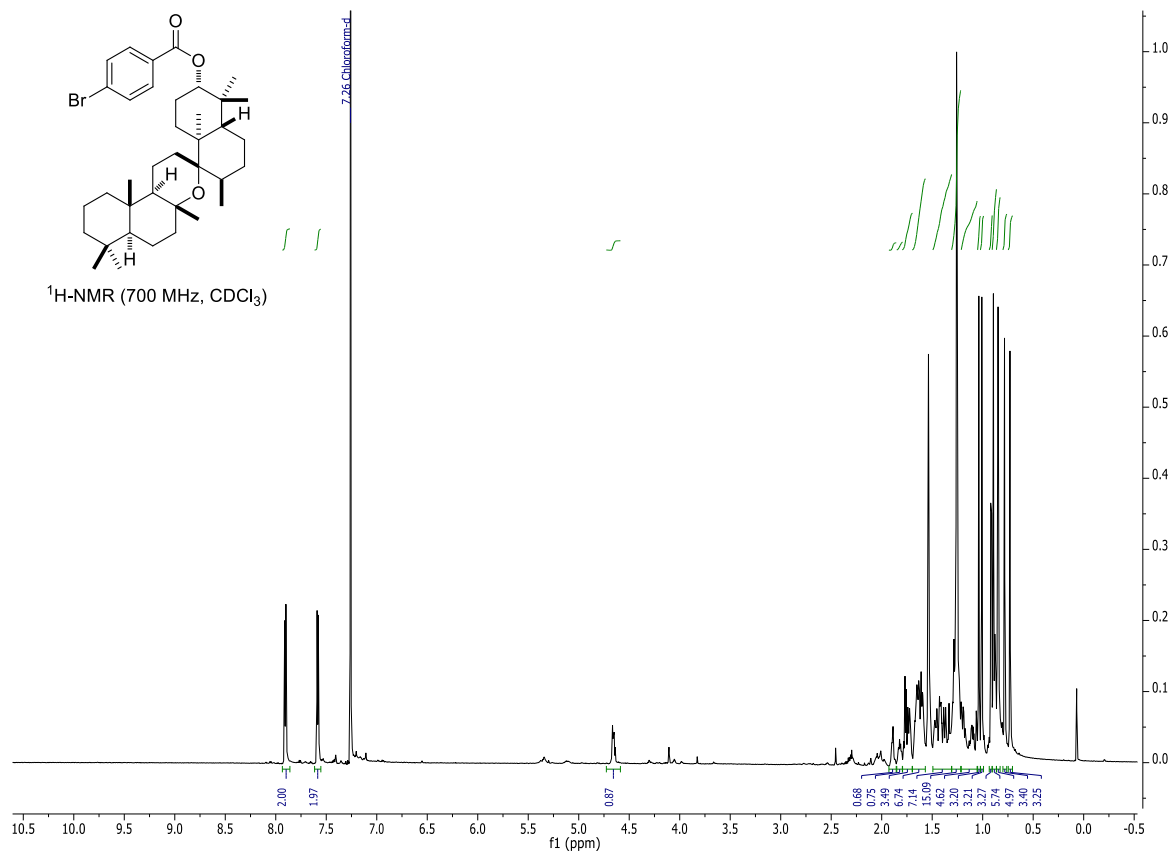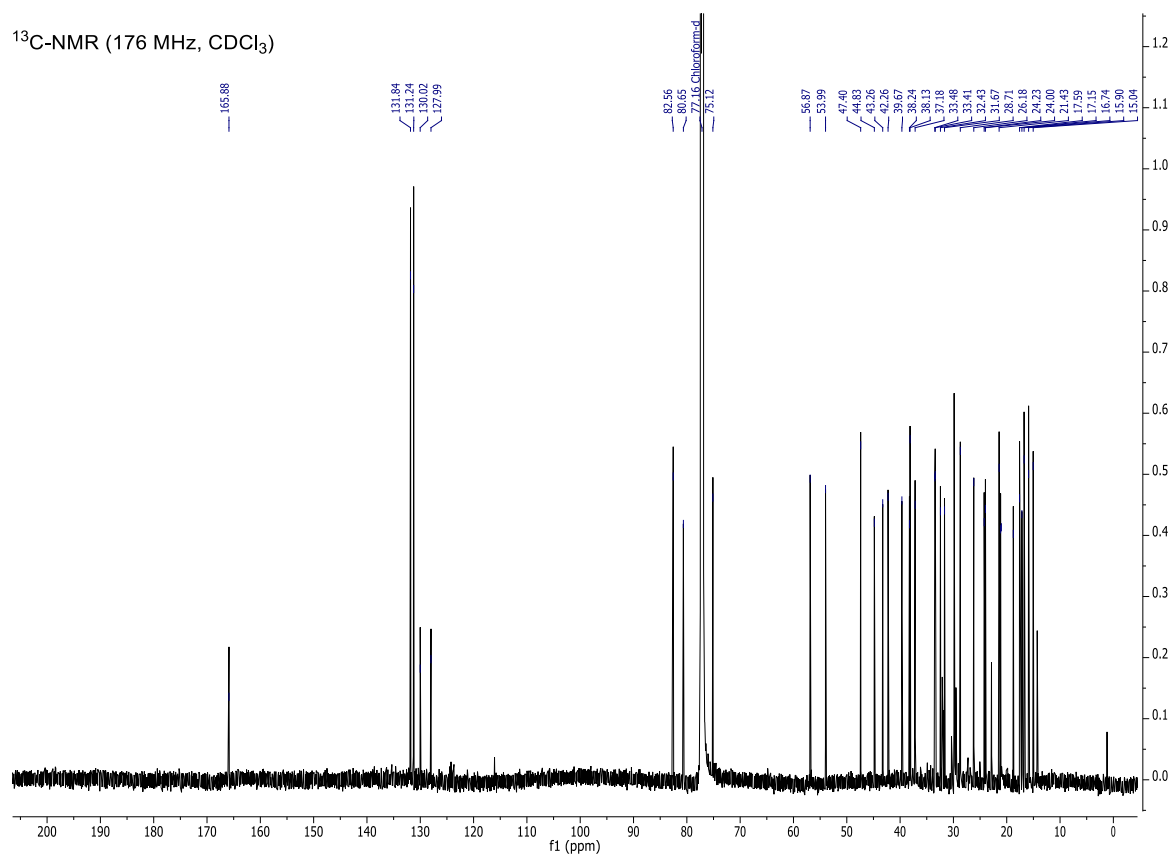

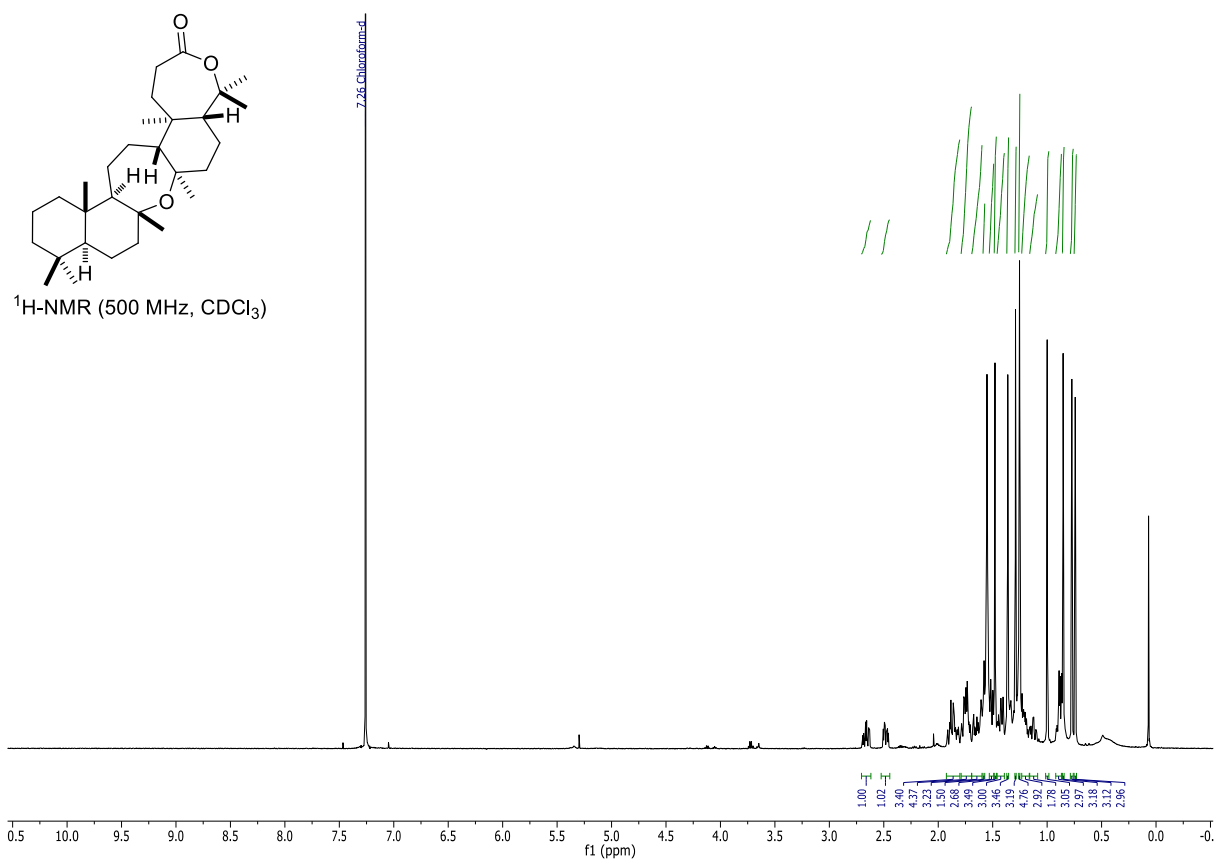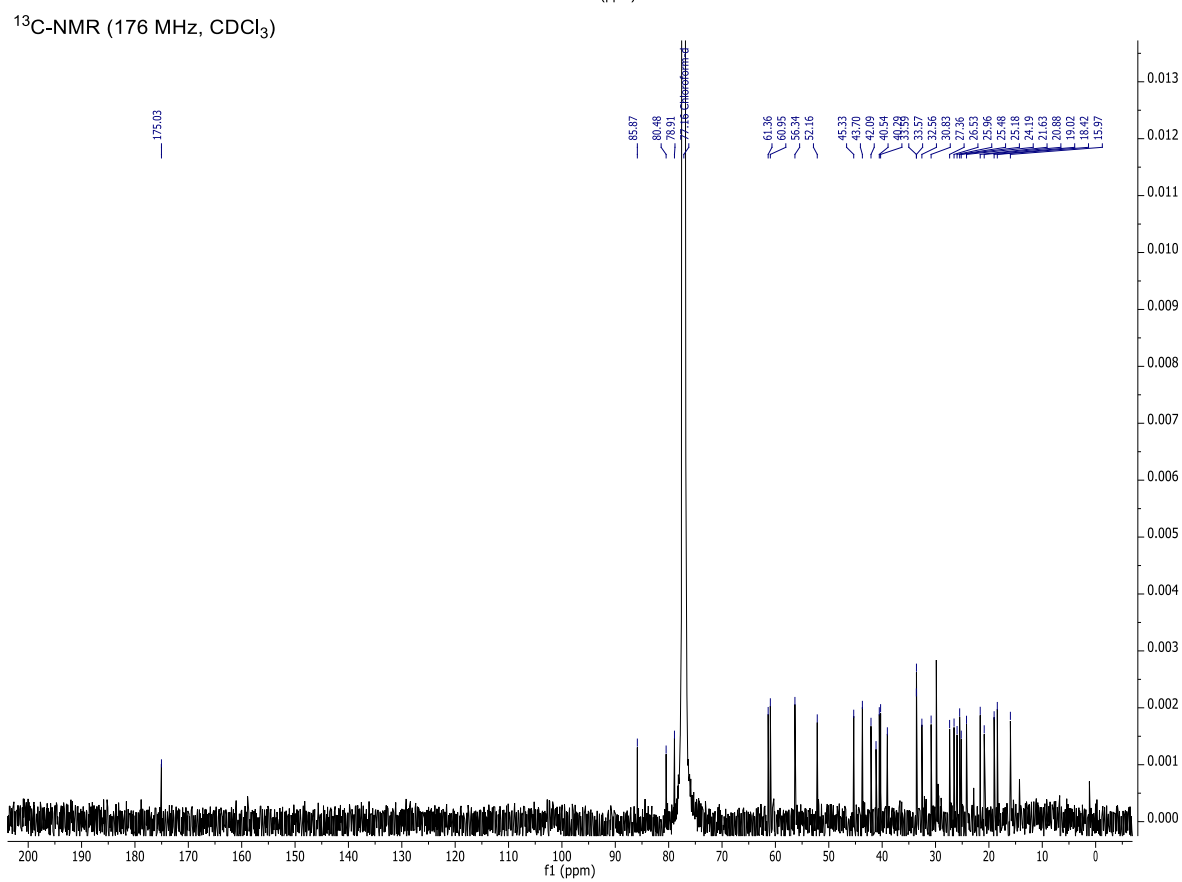

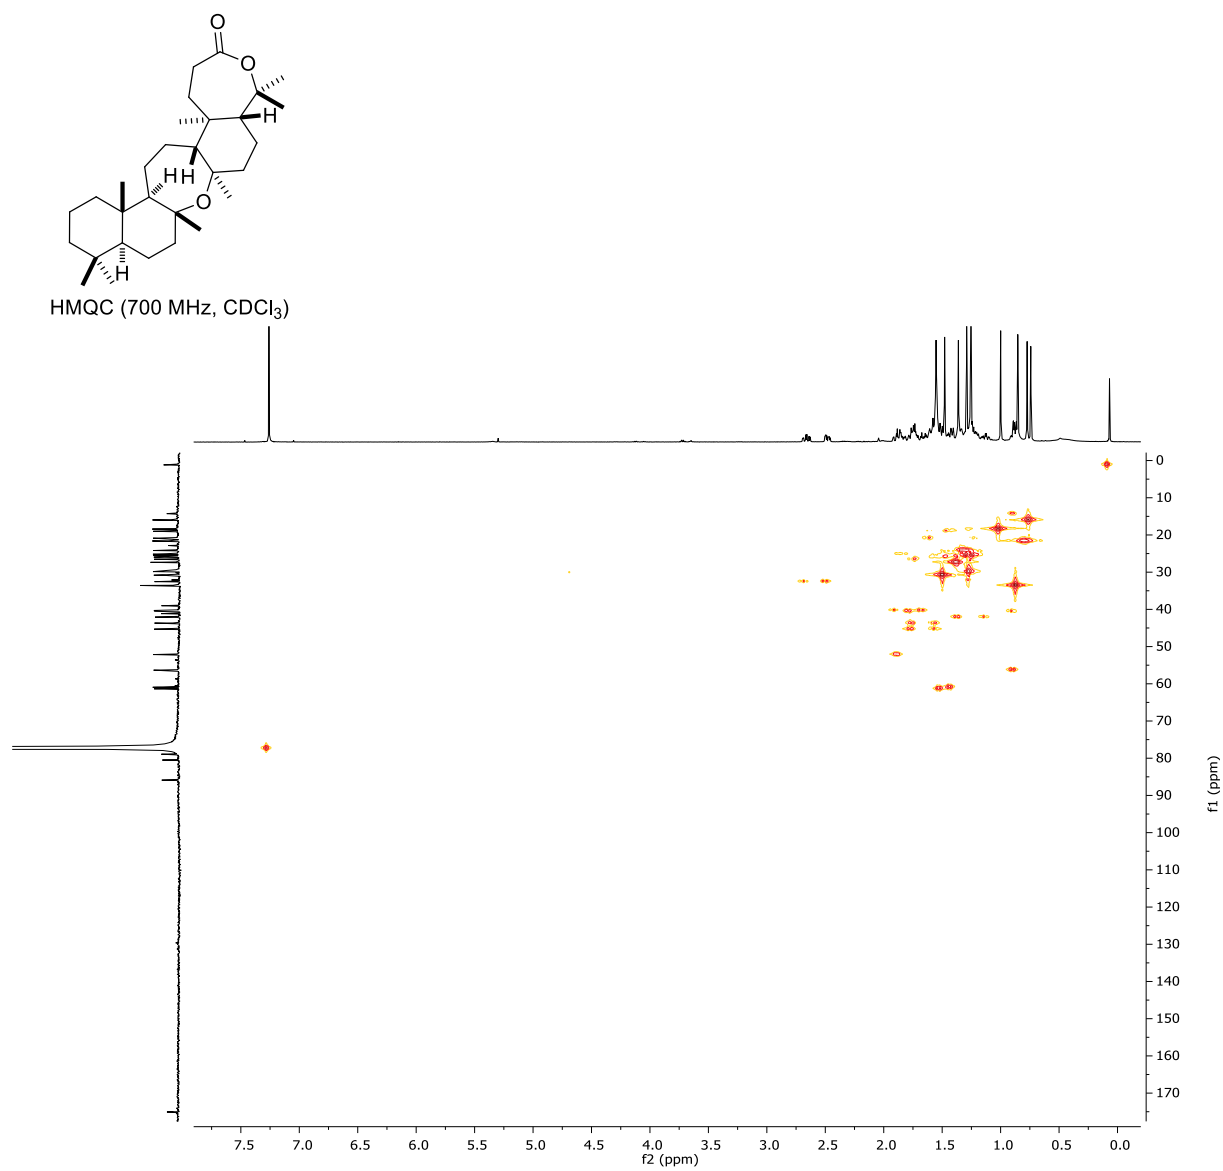

## Zoom in HMQC spectrum

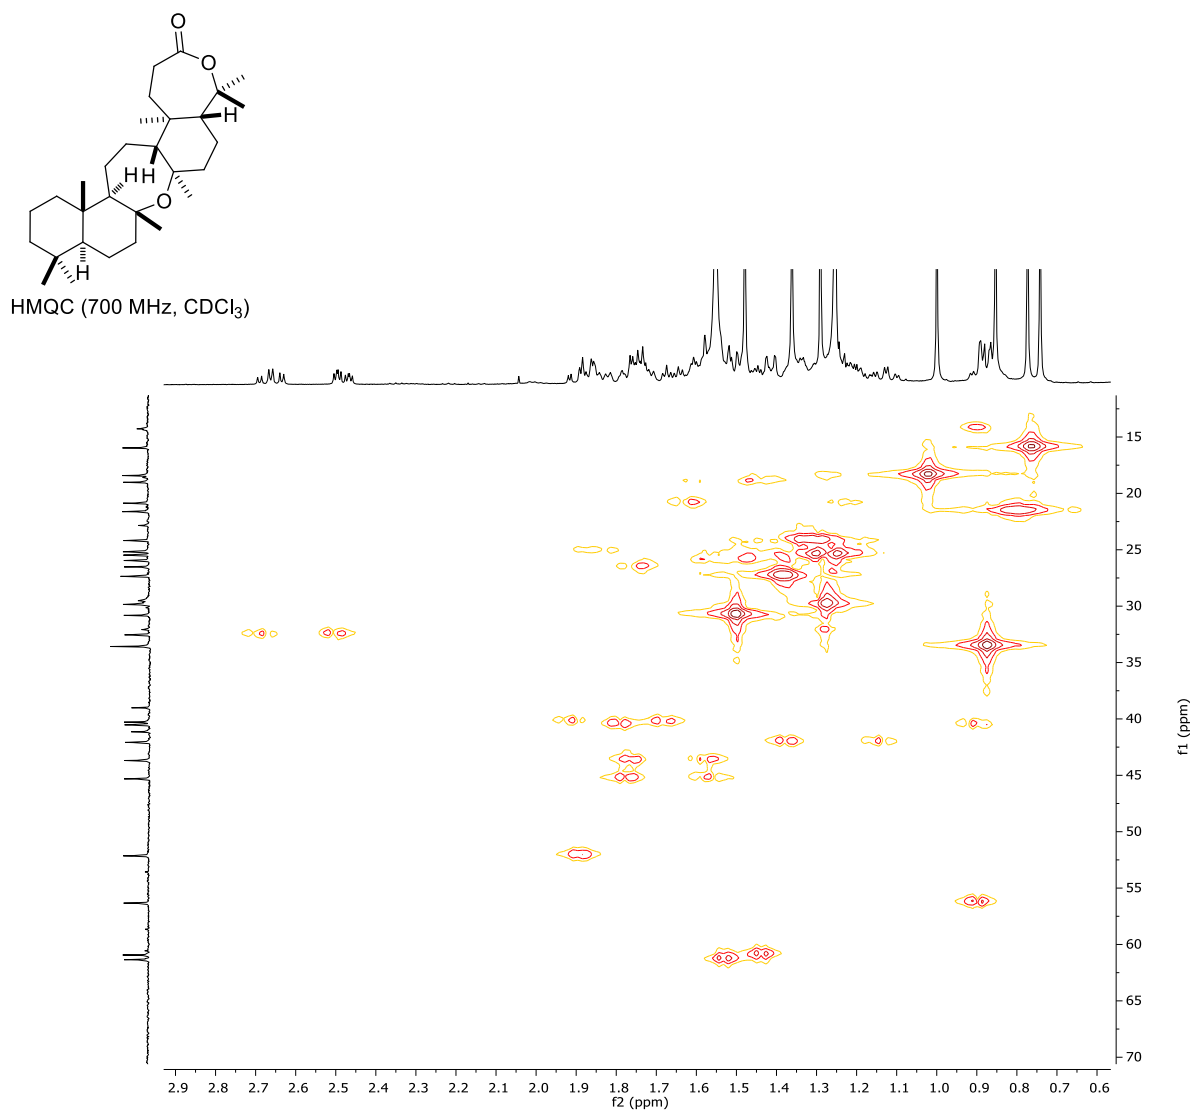

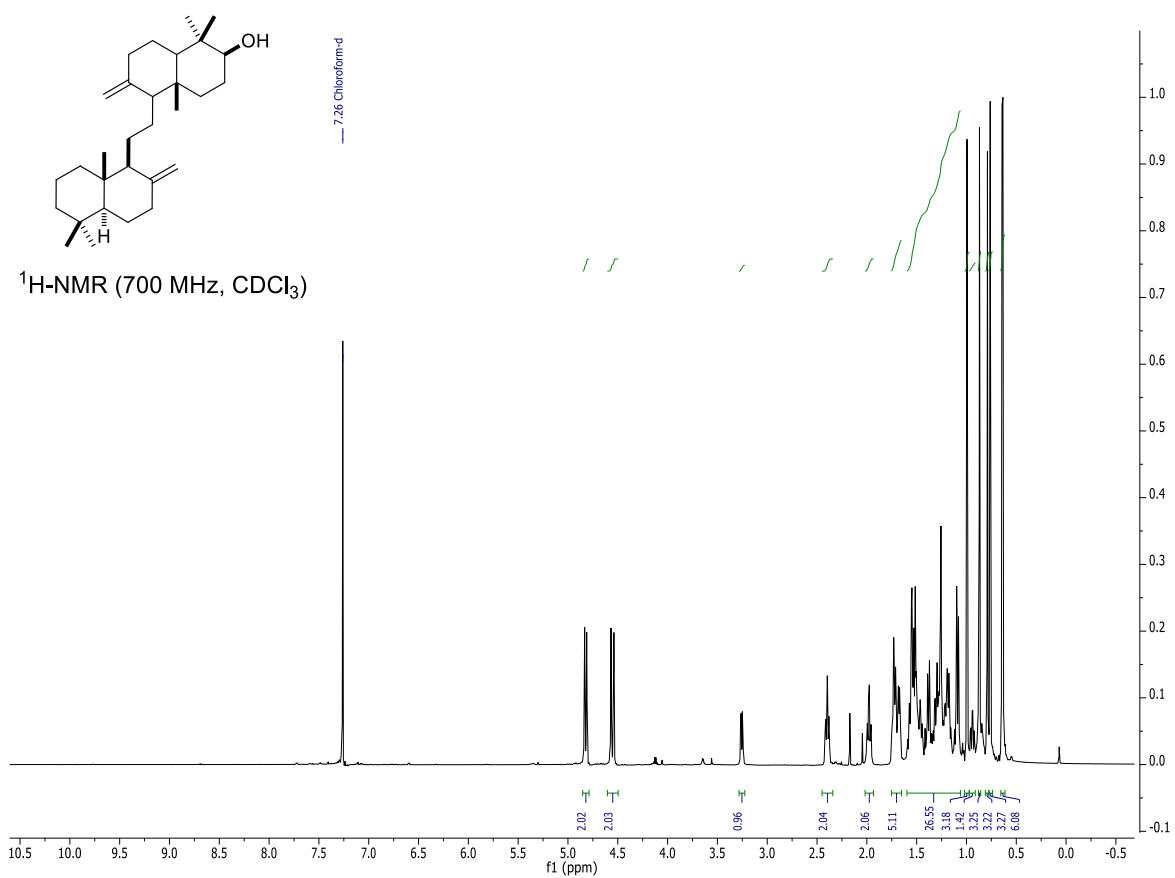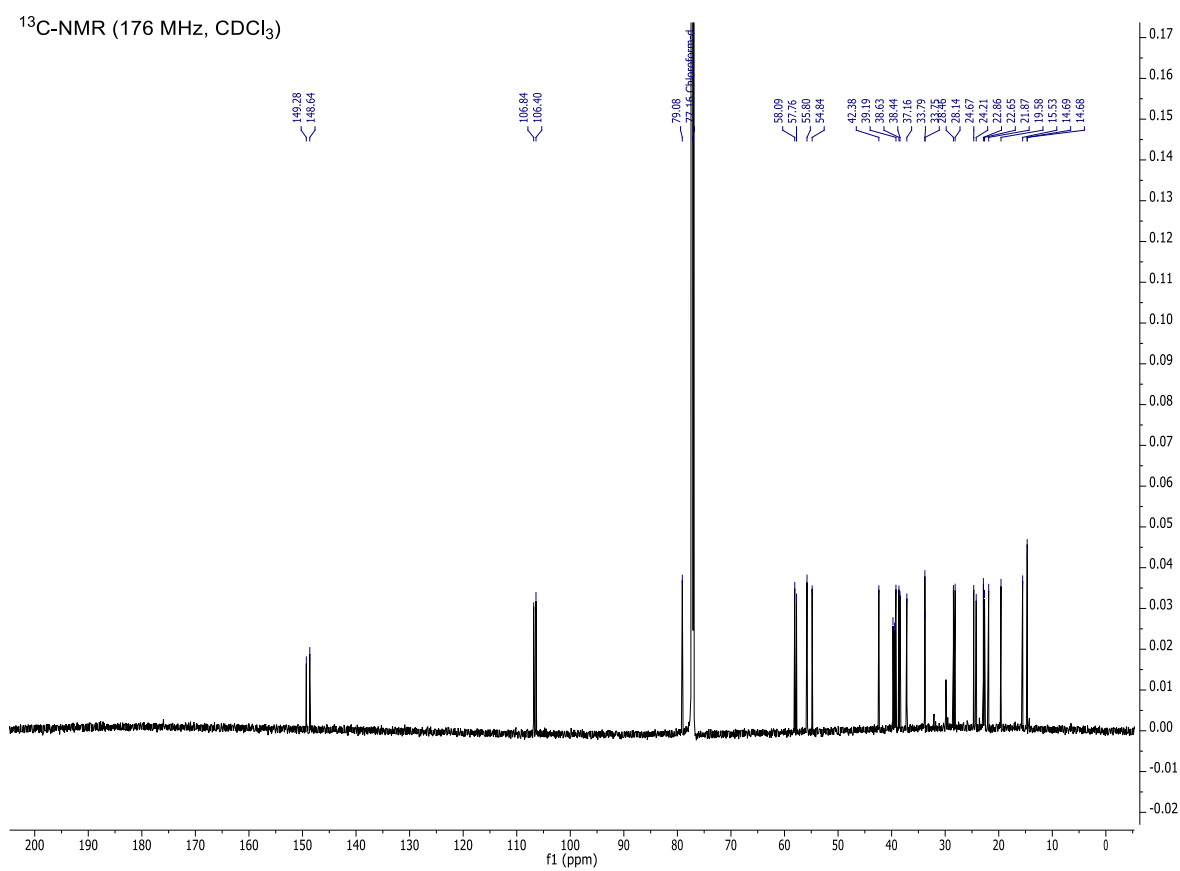

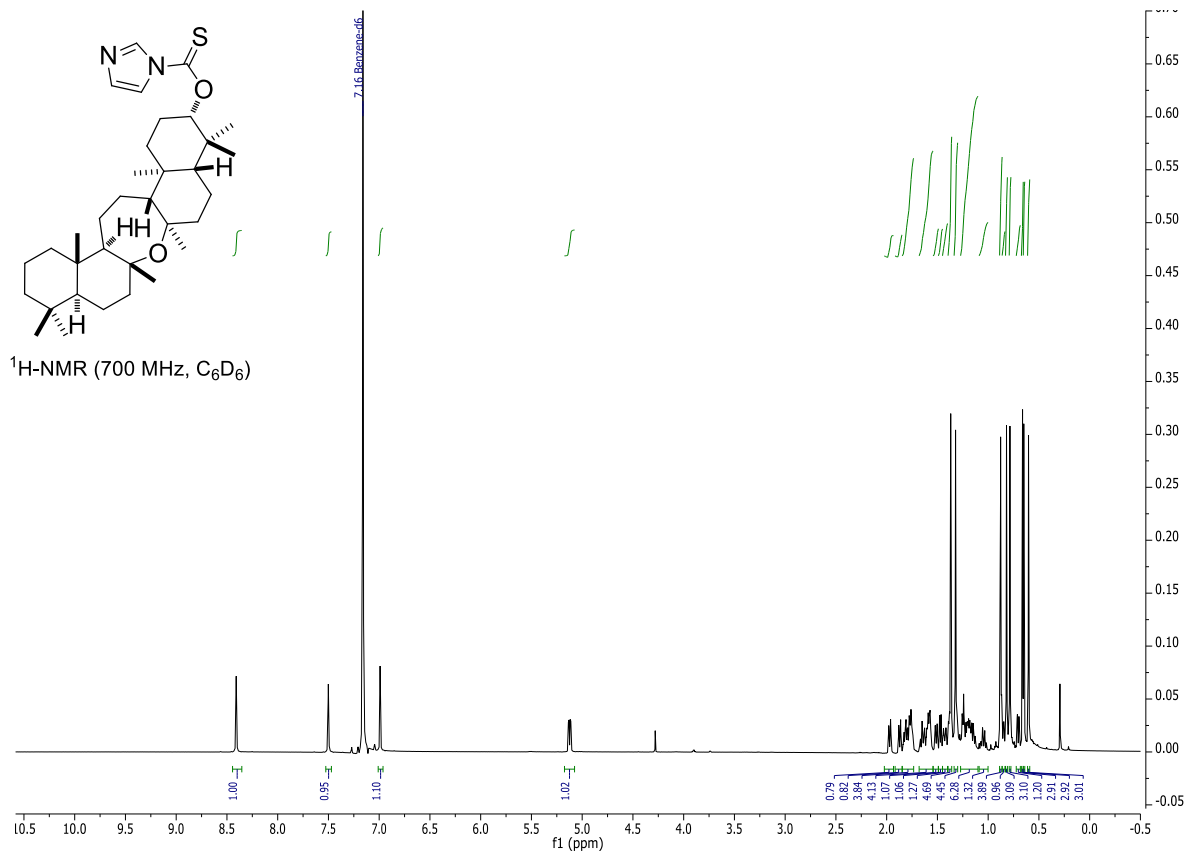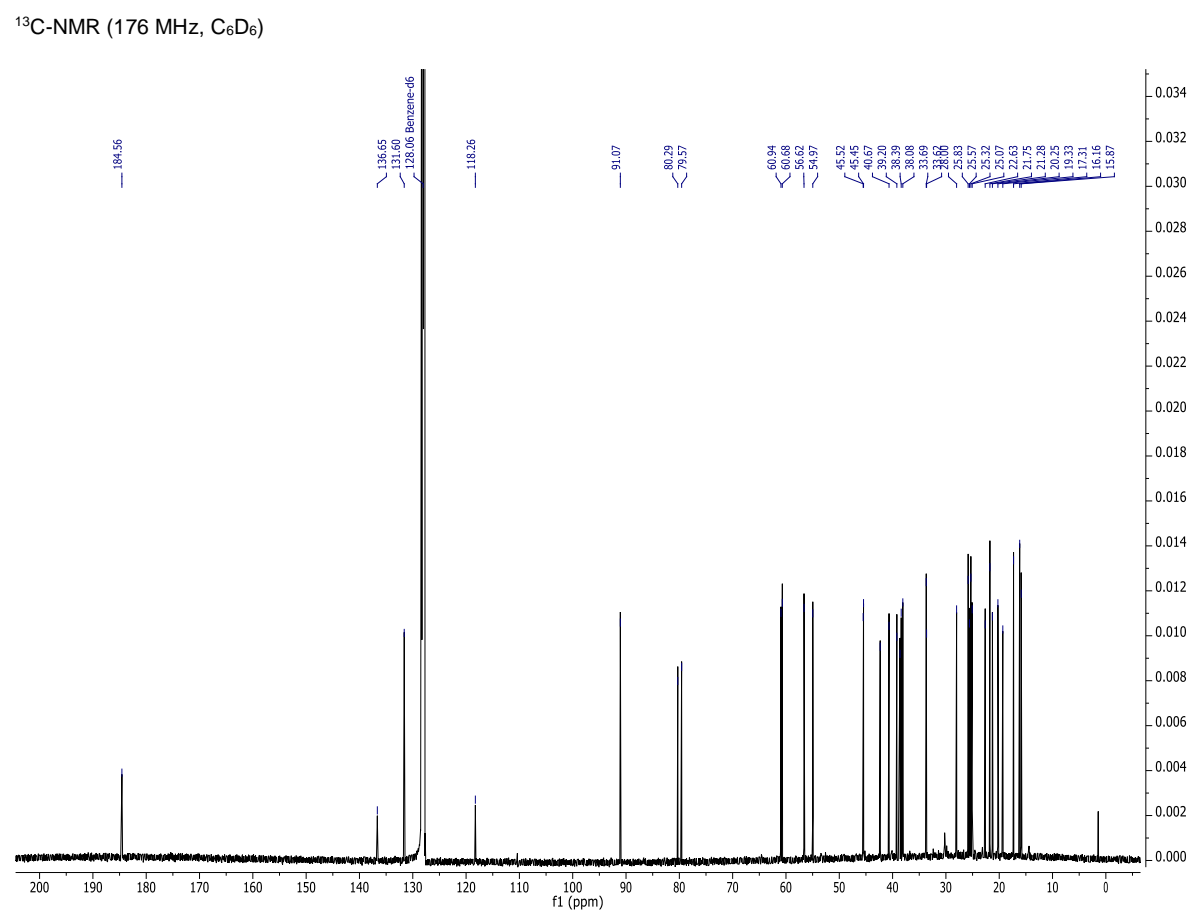

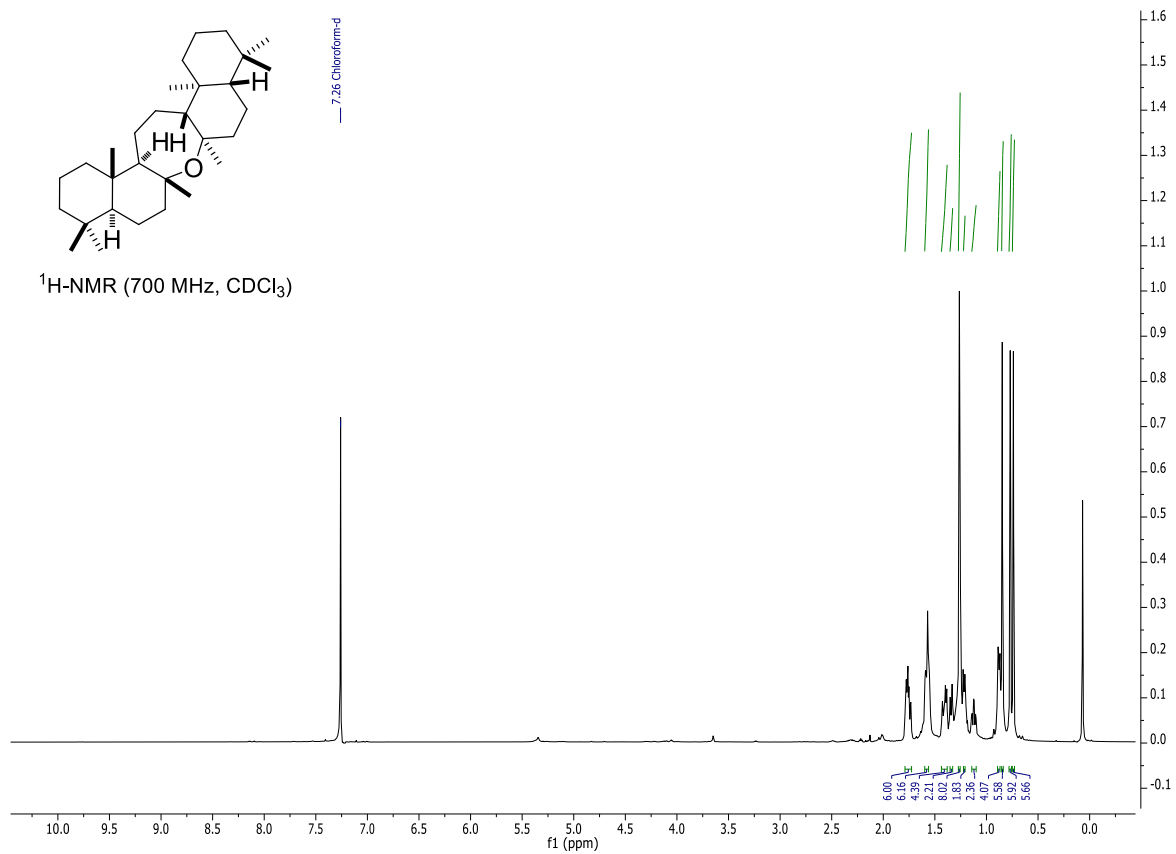

<sup>13</sup>C-NMR (176 MHz, CDCl<sub>3</sub>)

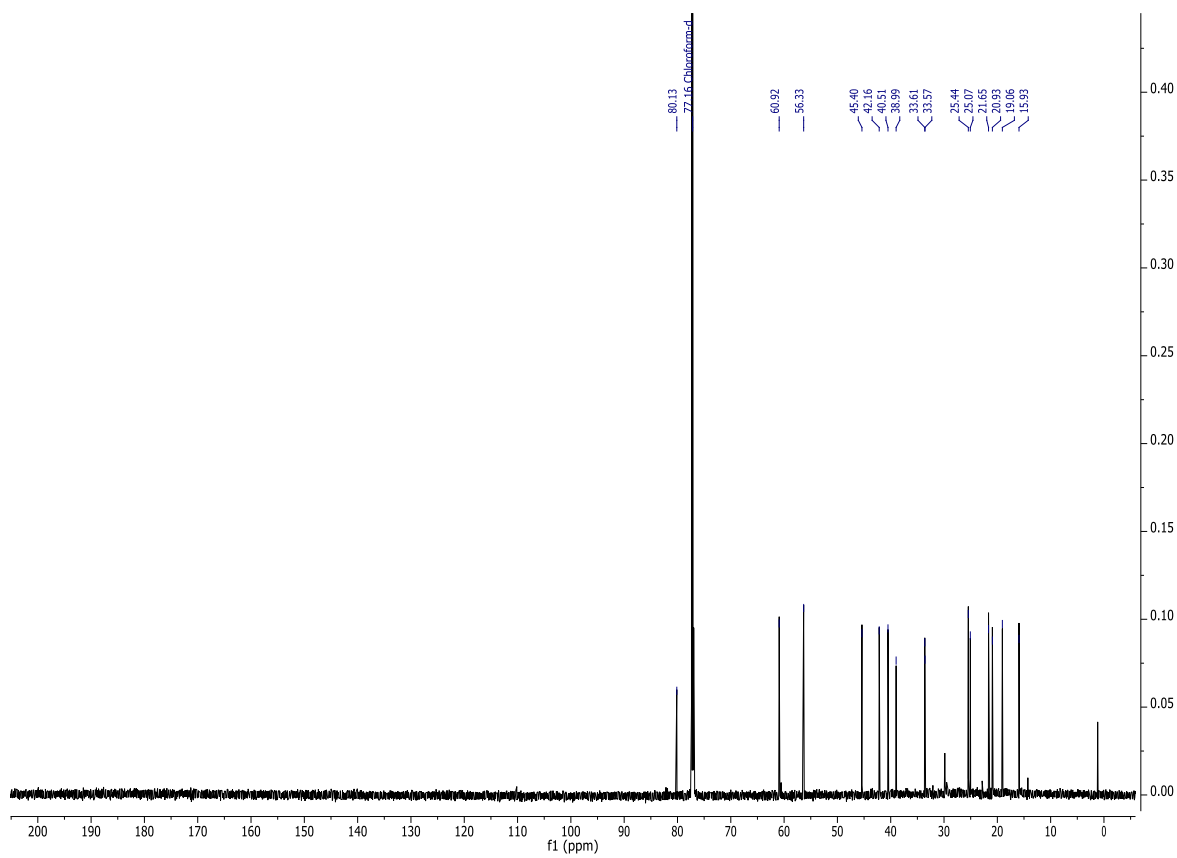

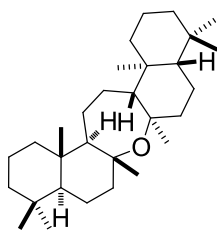

HMQC (700 MHz, CDCl<sub>3</sub>)

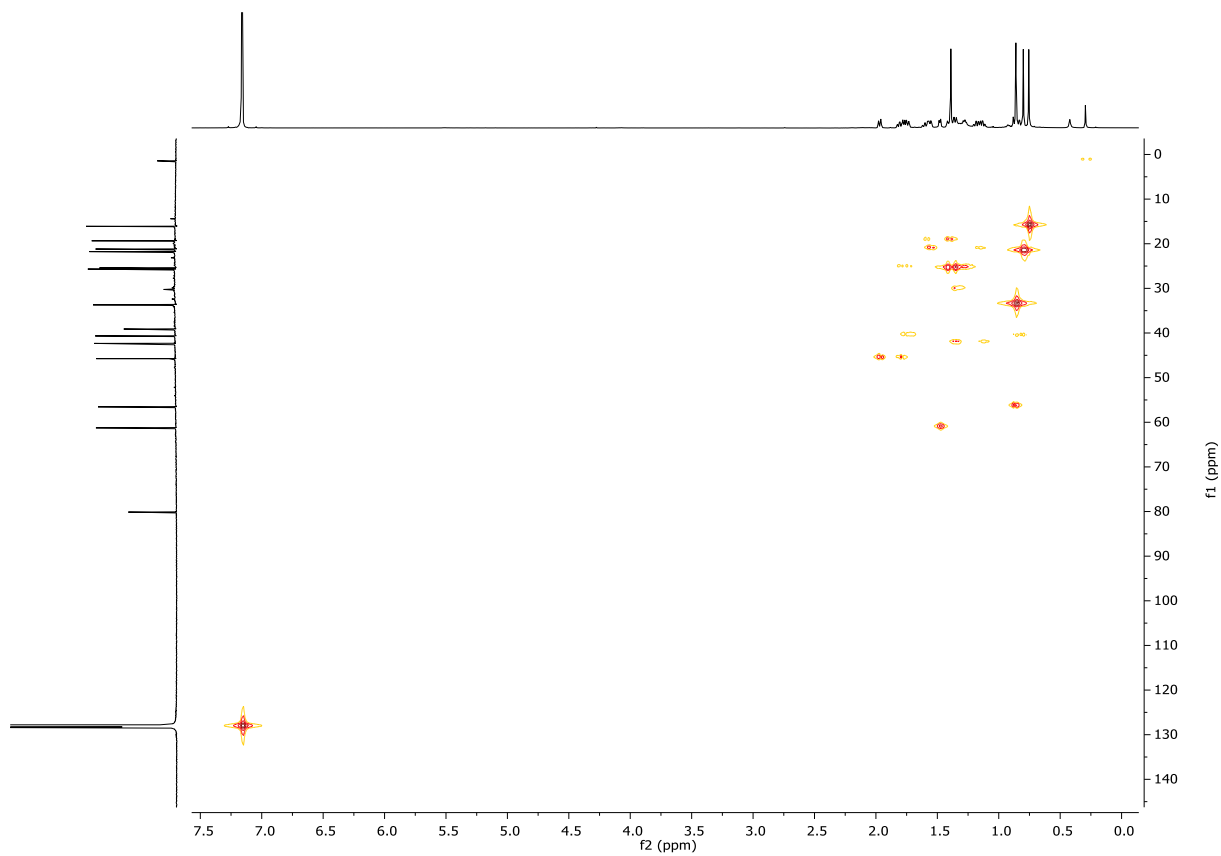

## Zoom in HMQC spectrum

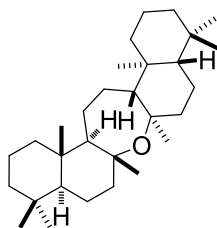

HMQC (700 MHz, CDCl<sub>3</sub>)

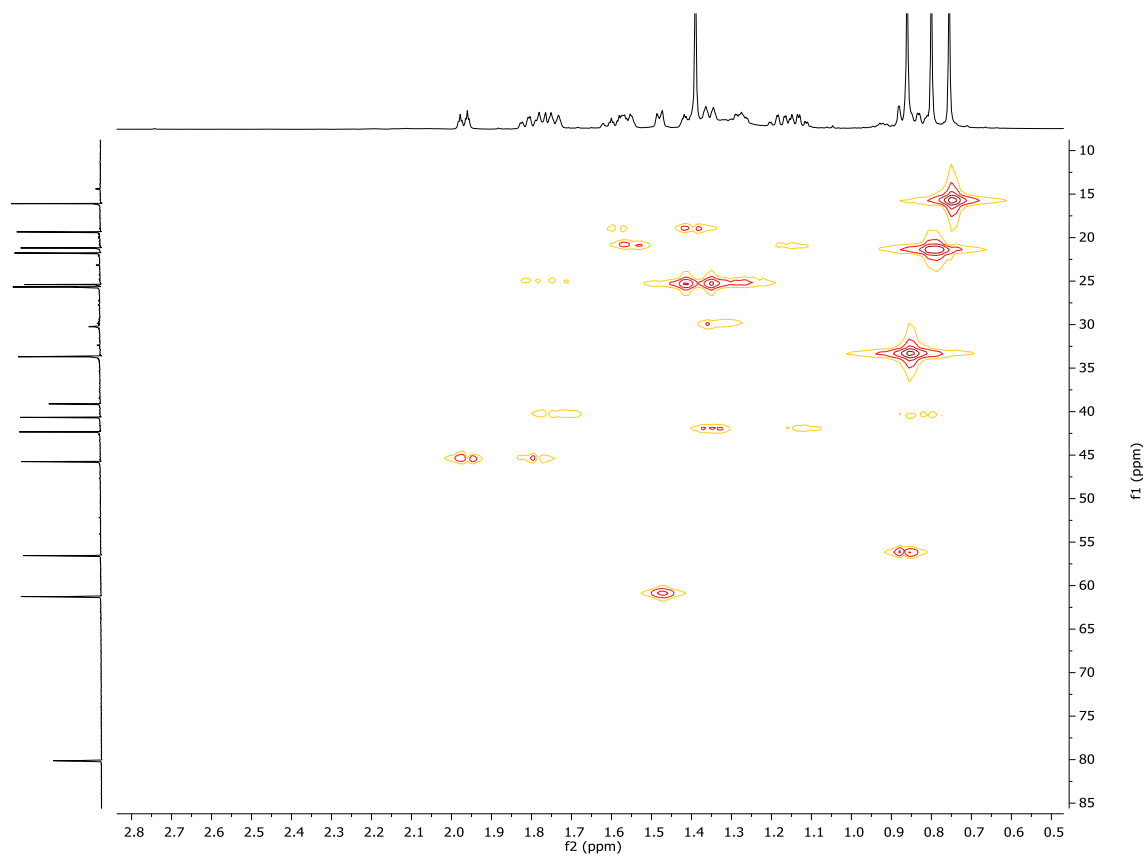

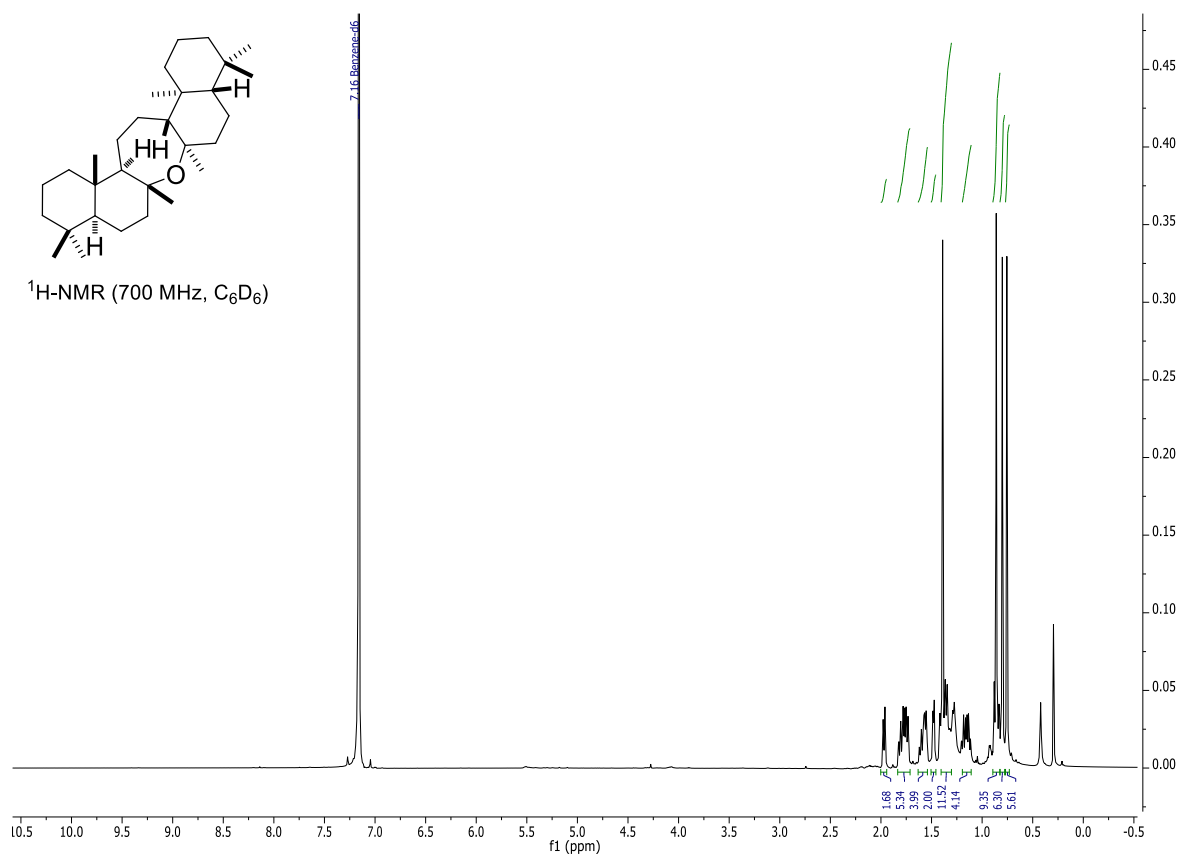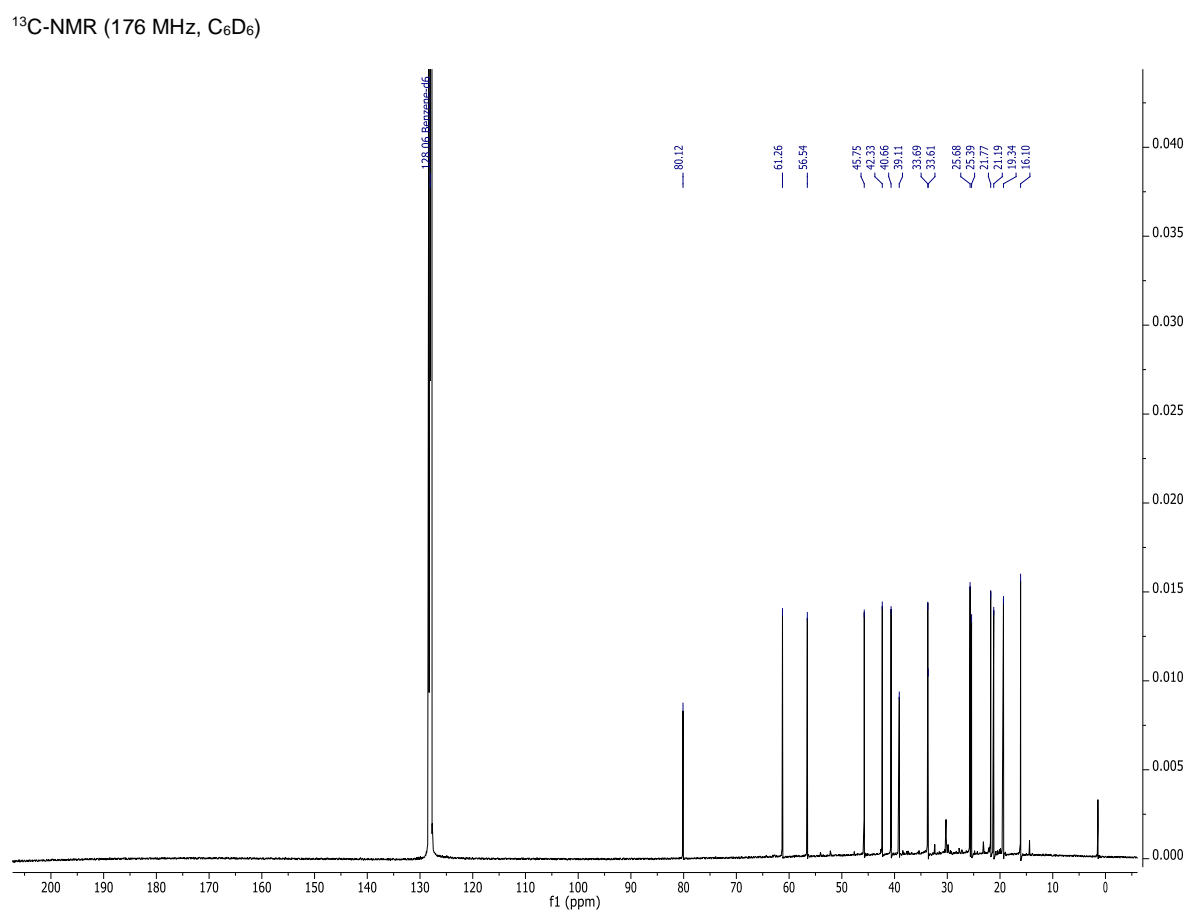

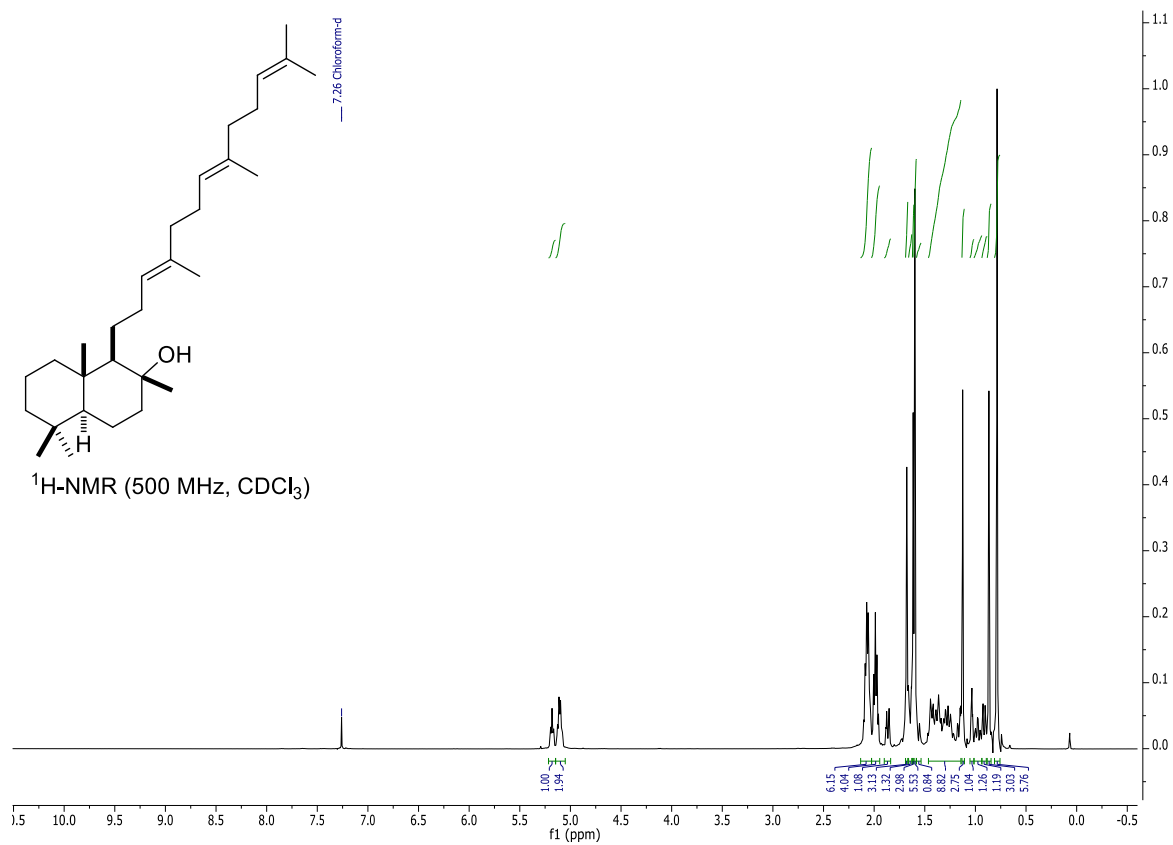

<sup>13</sup>C-NMR (126 MHz, CDCl<sub>3</sub>)

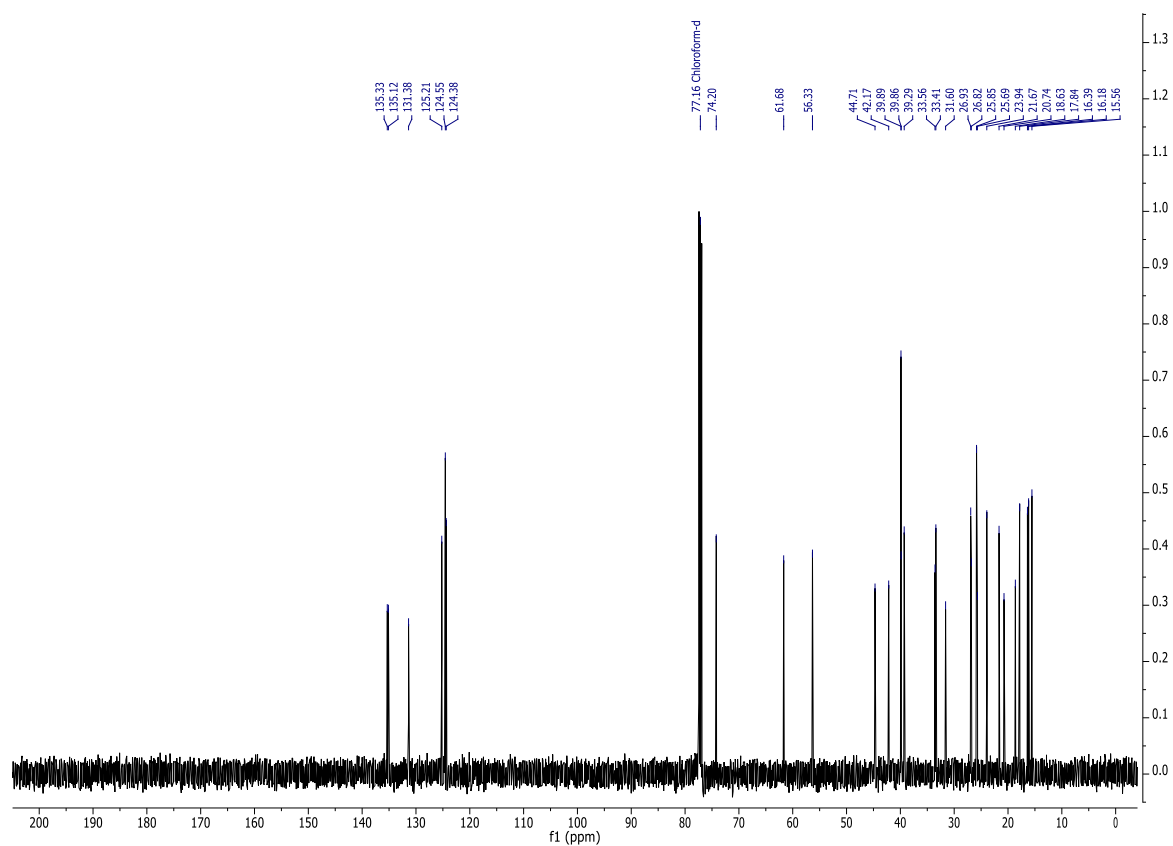

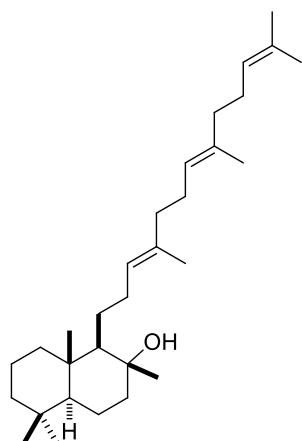

HMQC (500 MHz,  $\text{CDCl}_3$ )

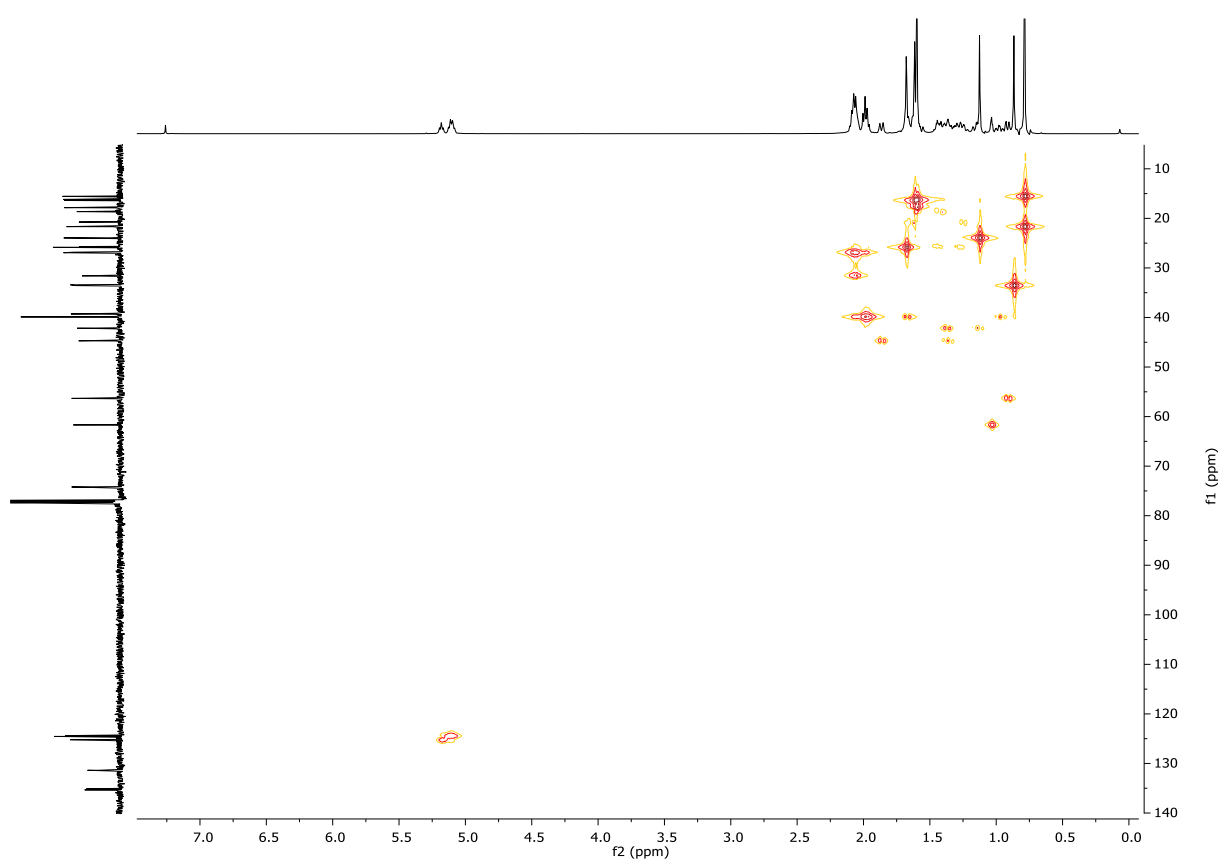

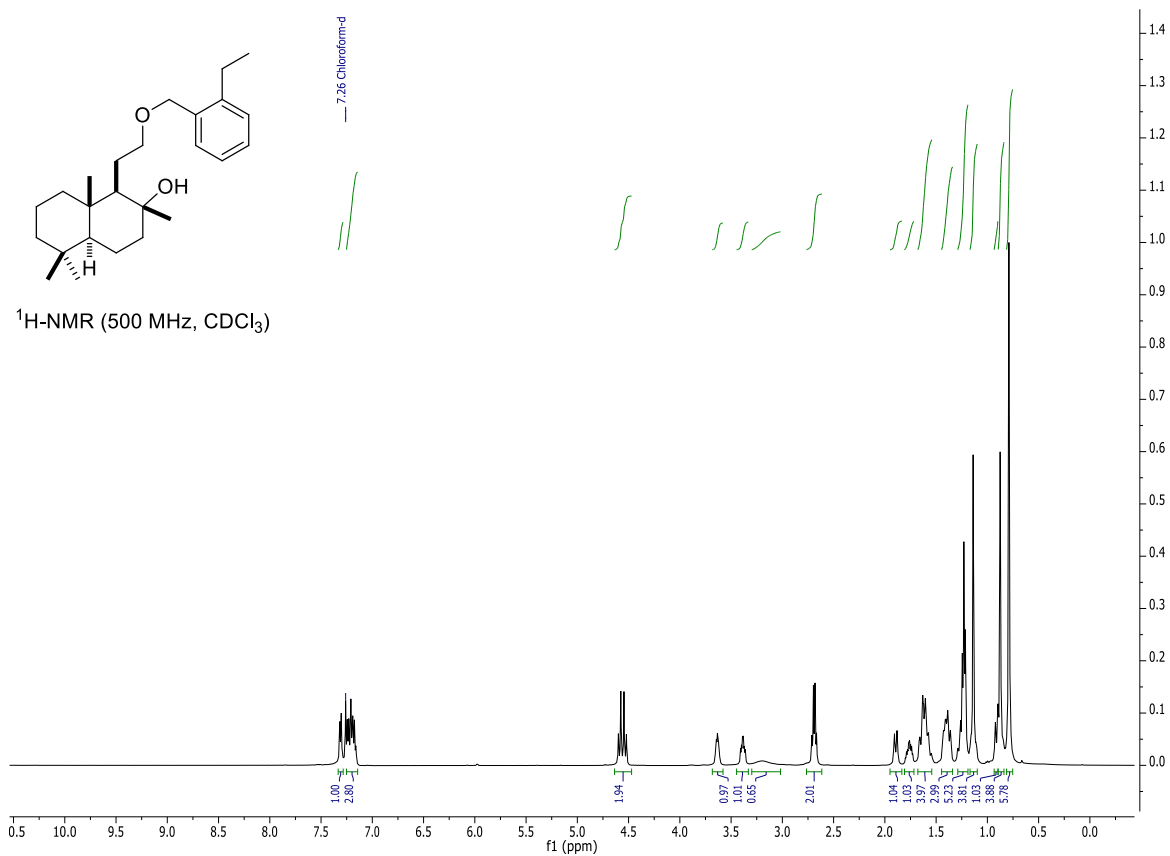

<sup>13</sup>C-NMR (126 MHz, CDCl<sub>3</sub>)

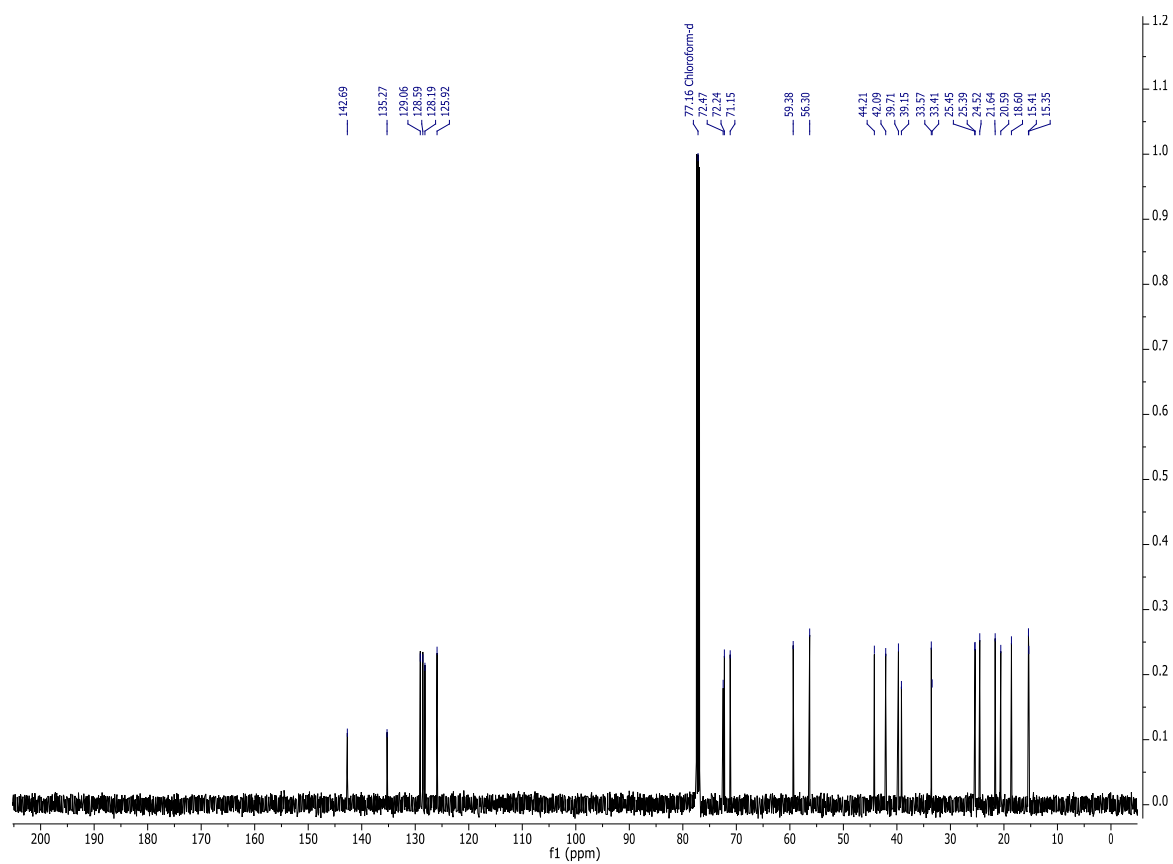

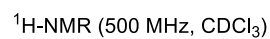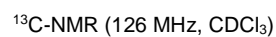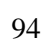

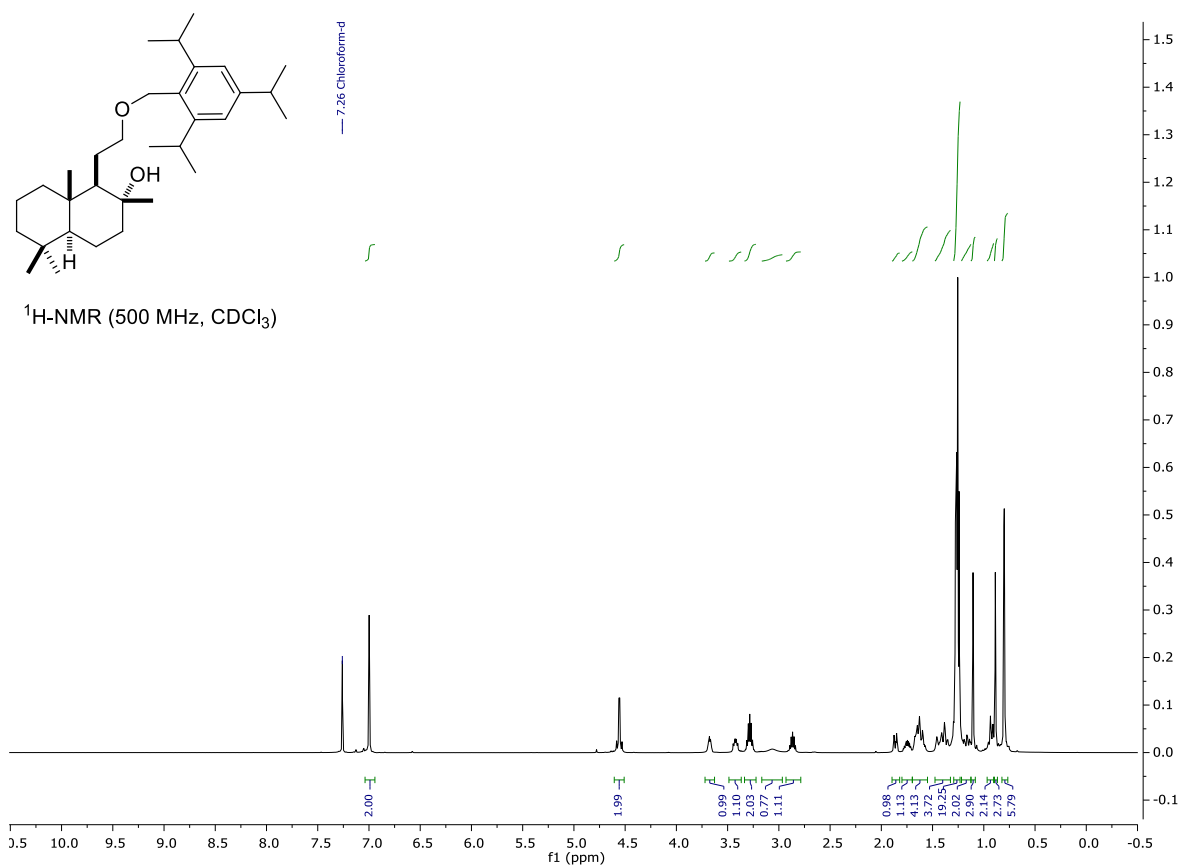

<sup>13</sup>C-NMR (126 MHz, CDCl<sub>3</sub>)

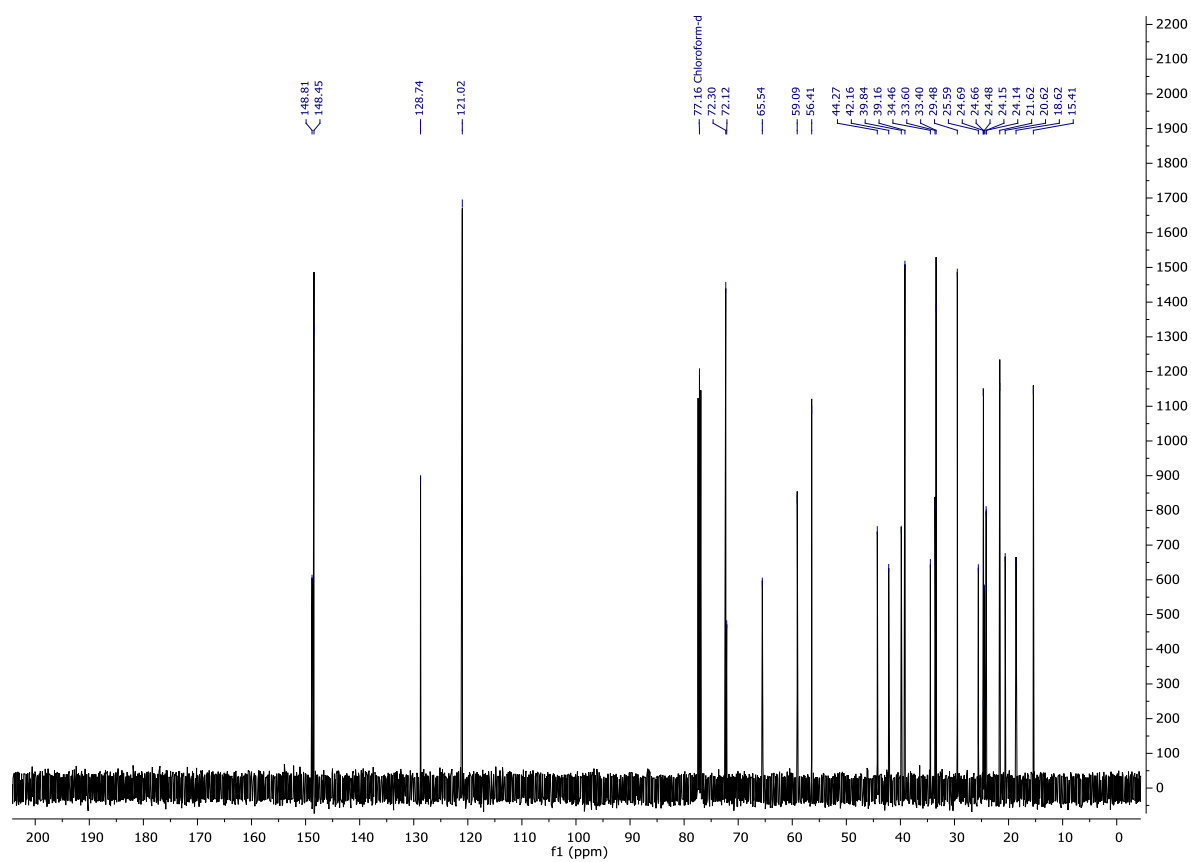

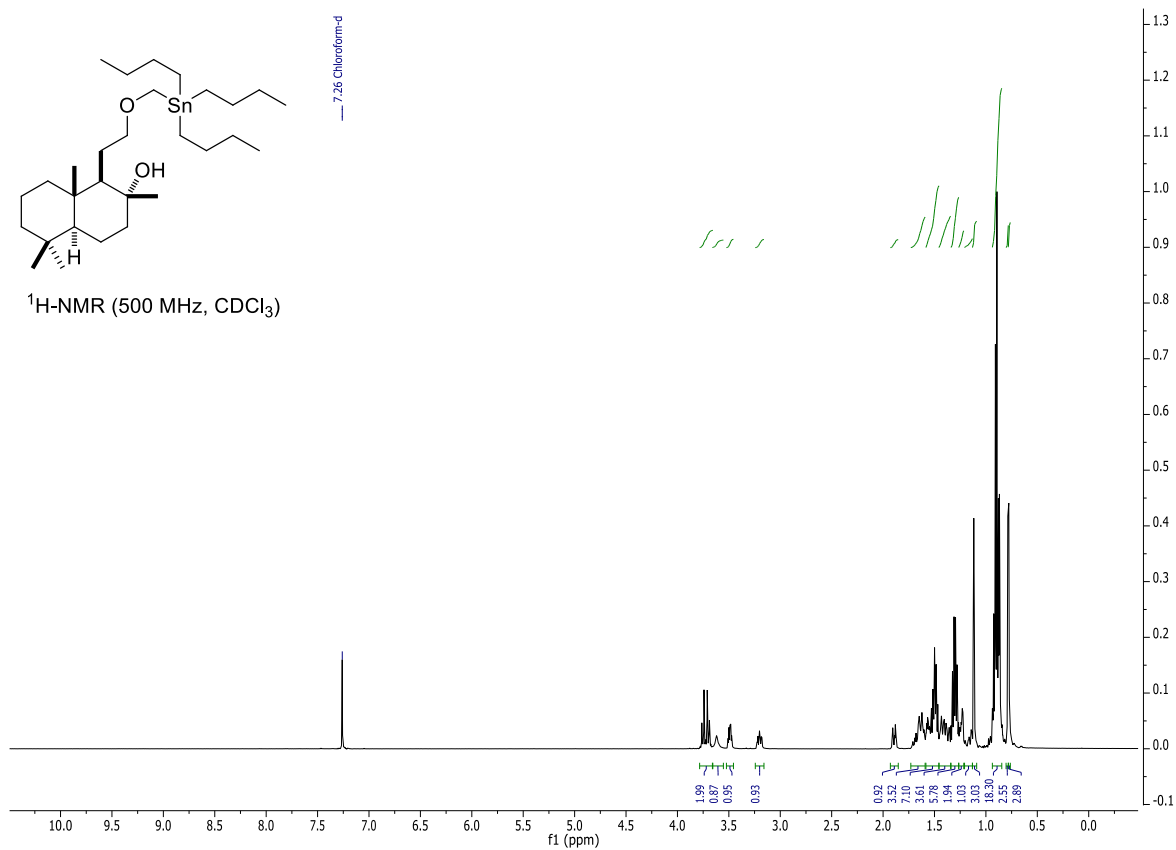

<sup>13</sup>C-NMR (176 MHz, CDCl<sub>3</sub>)

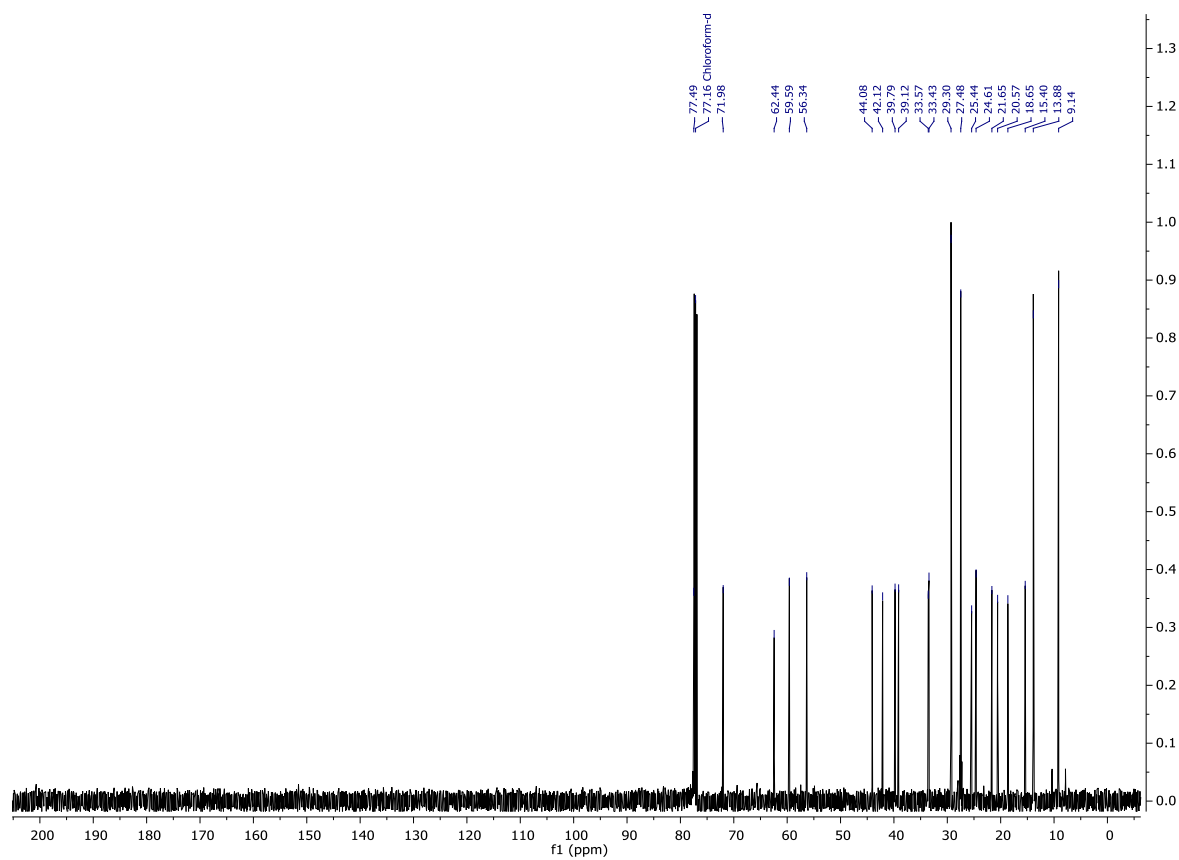



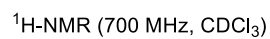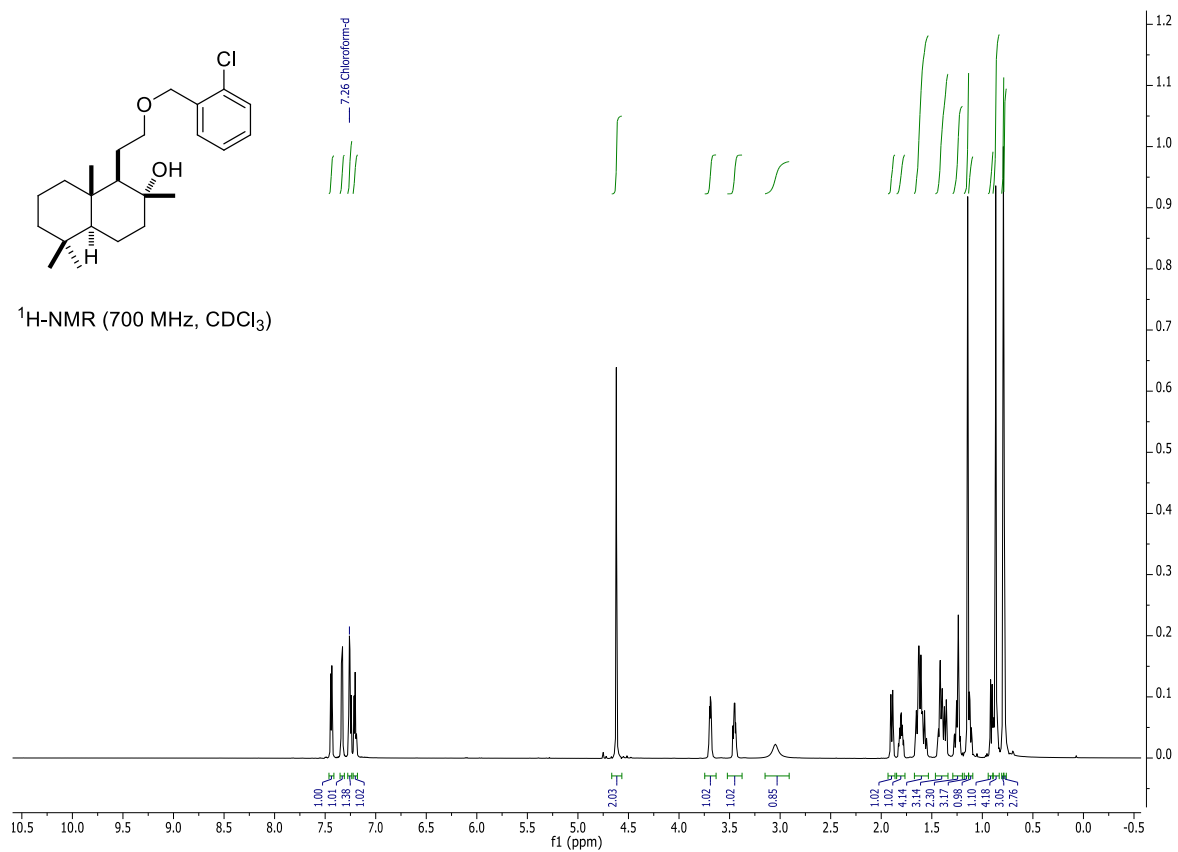 $^{13}\text{C}$ -NMR (176 MHz,  $\text{CDCl}_3$ )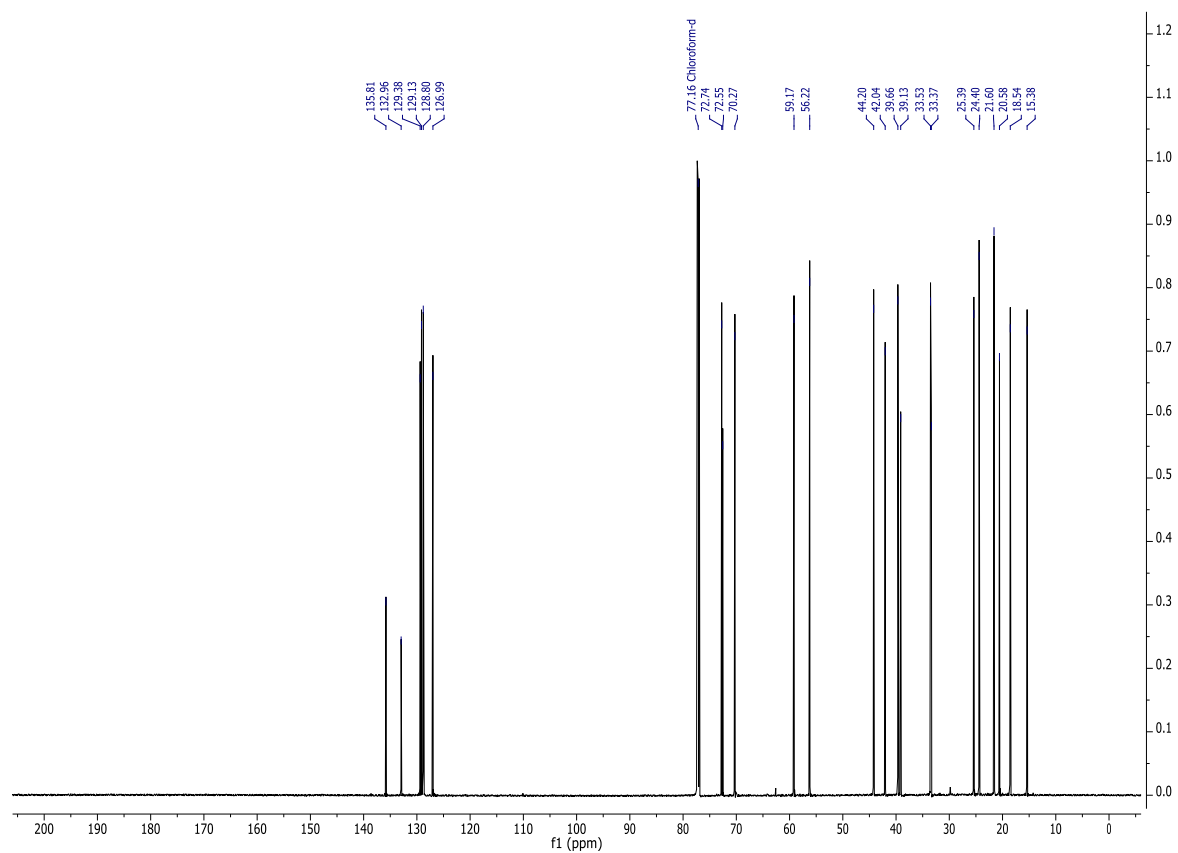

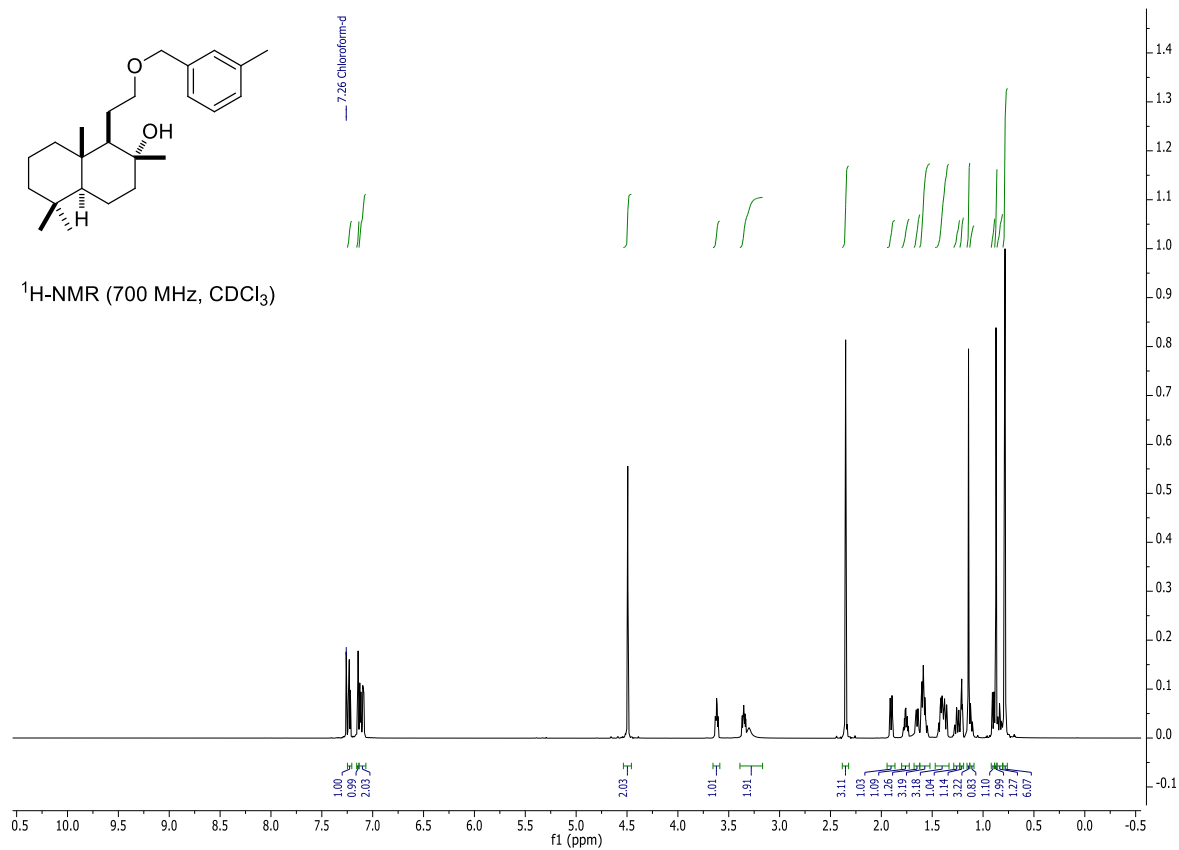

<sup>13</sup>C-NMR (176 MHz, CDCl<sub>3</sub>)

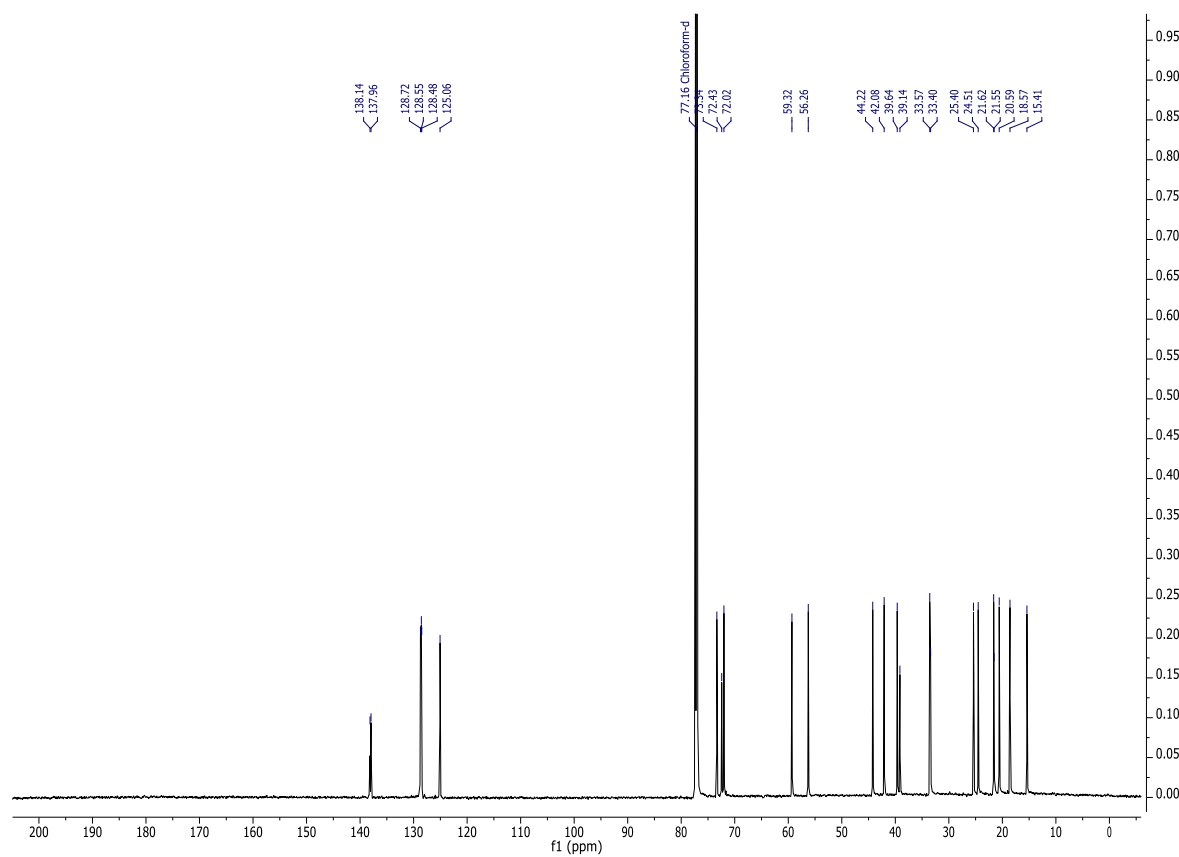

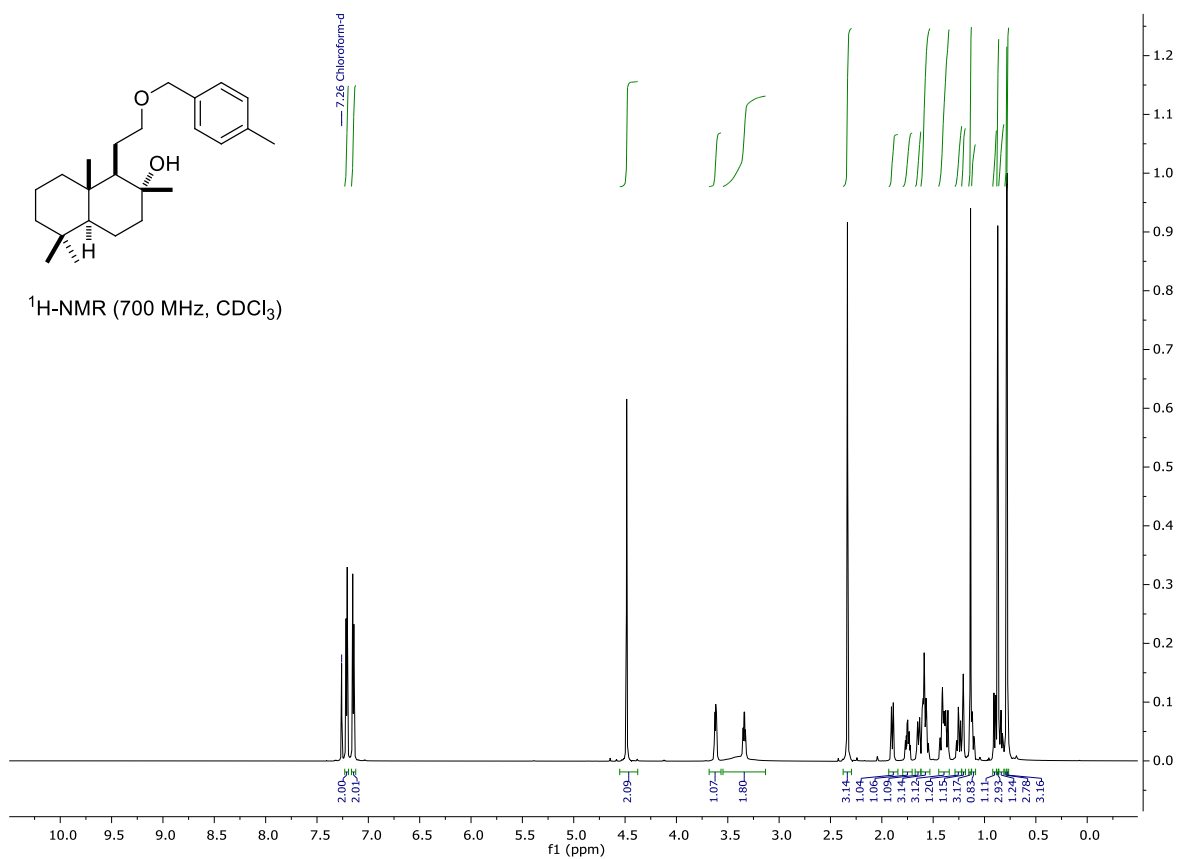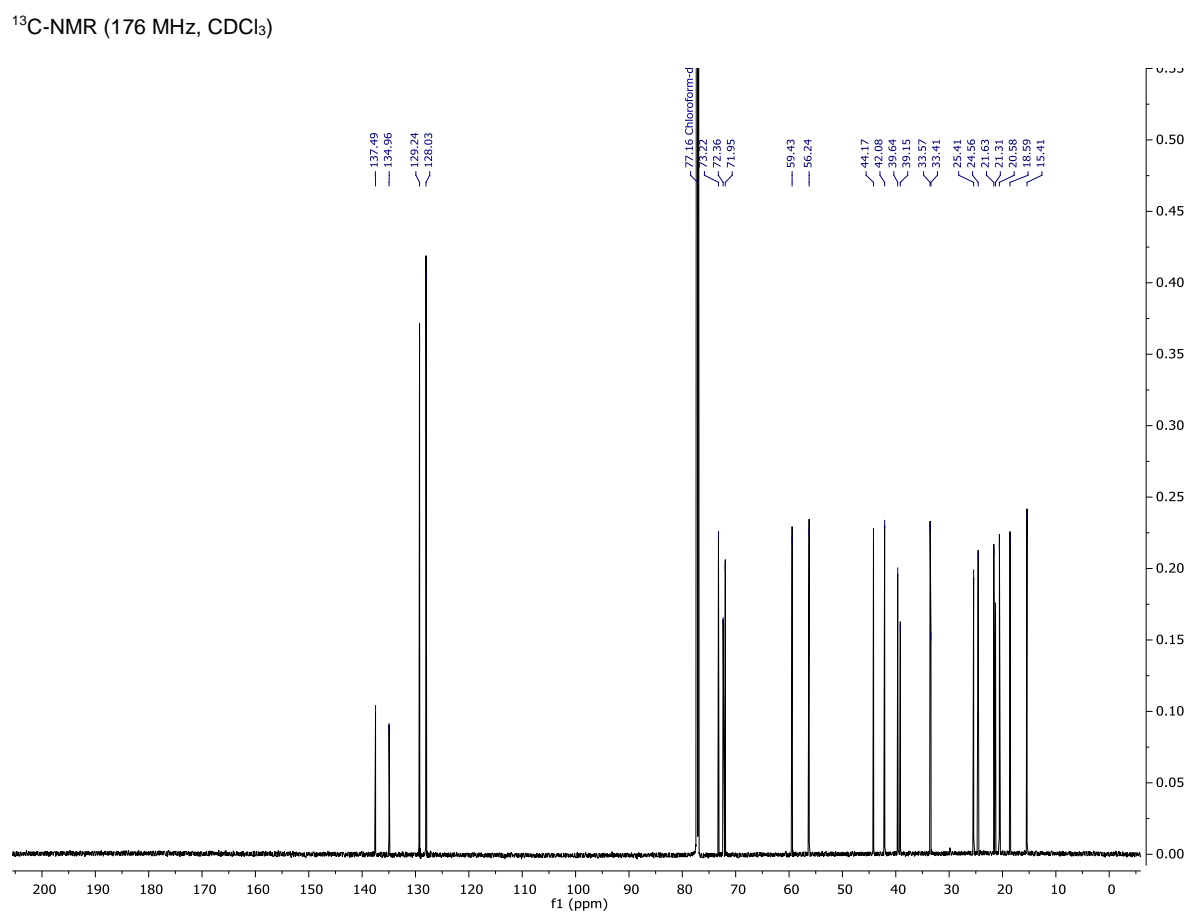

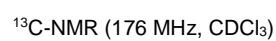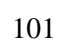

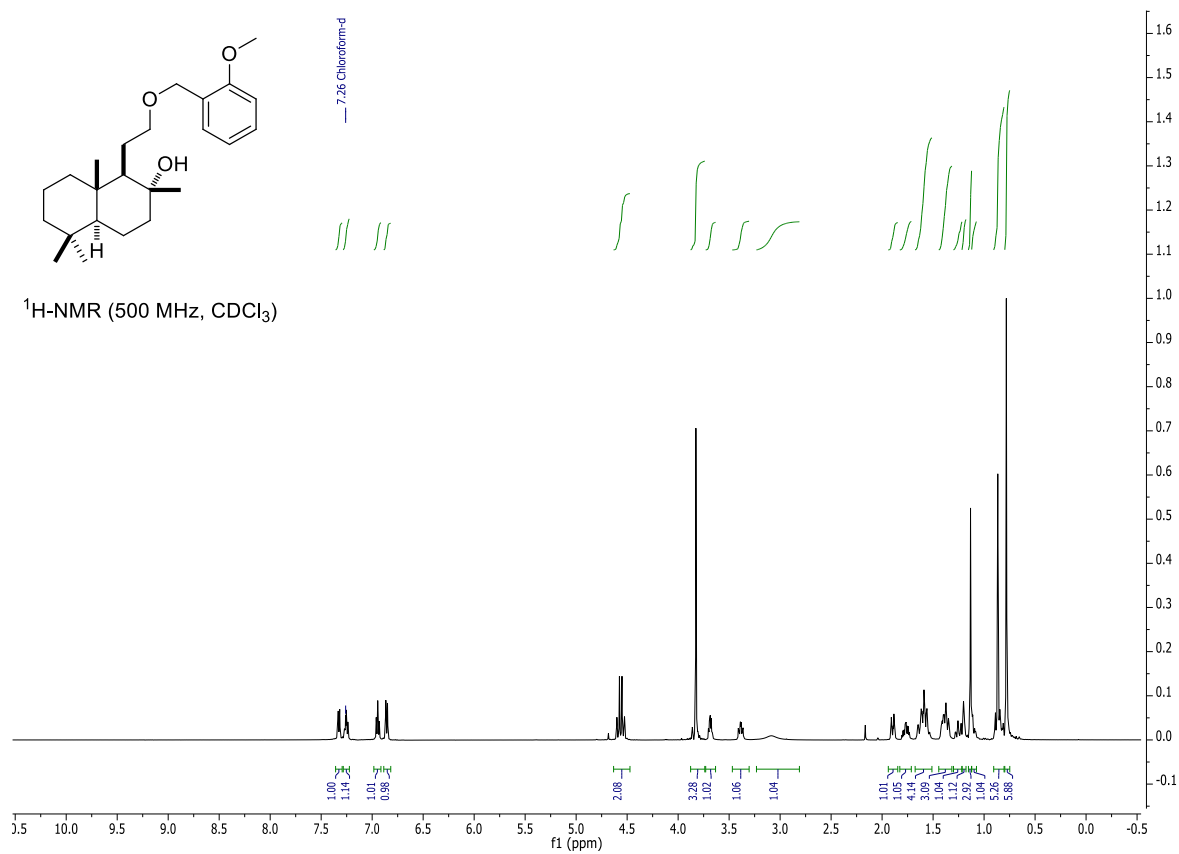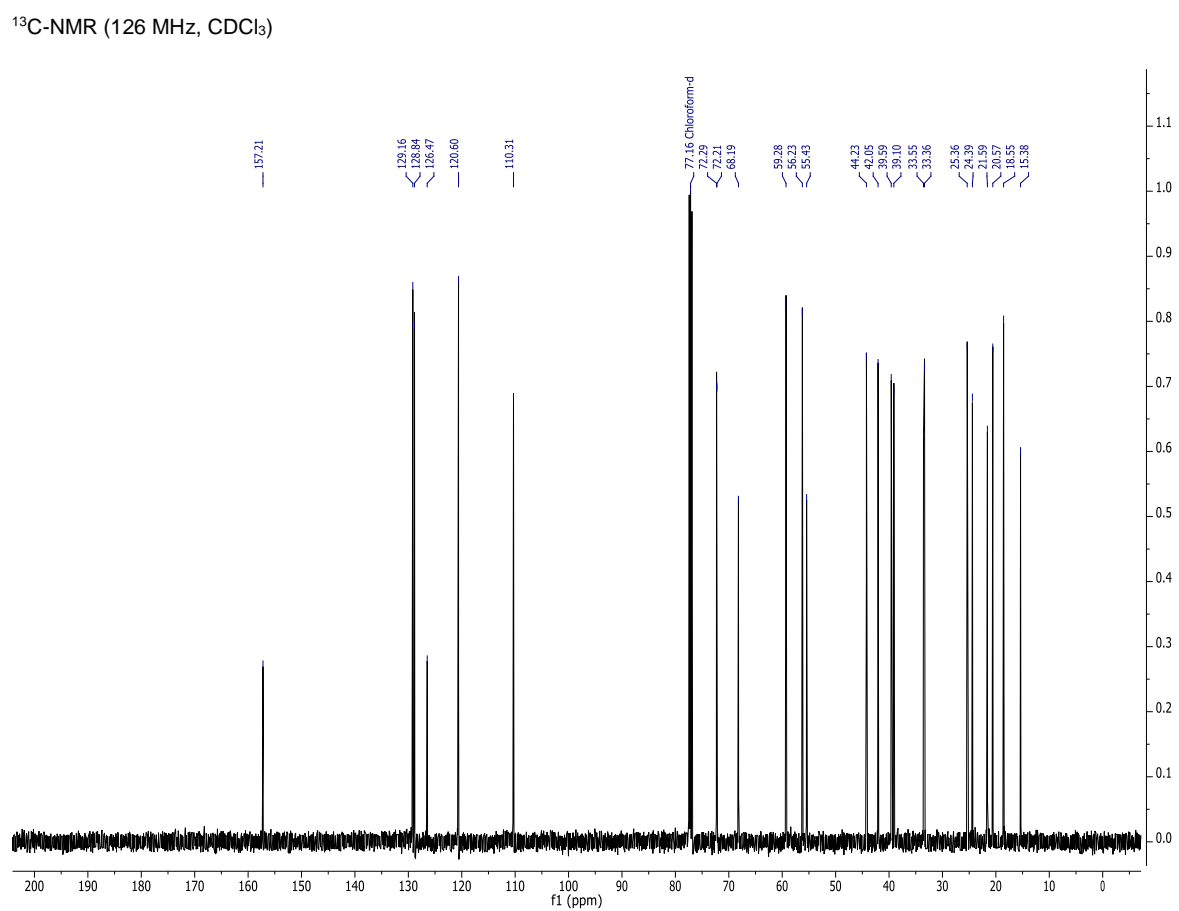

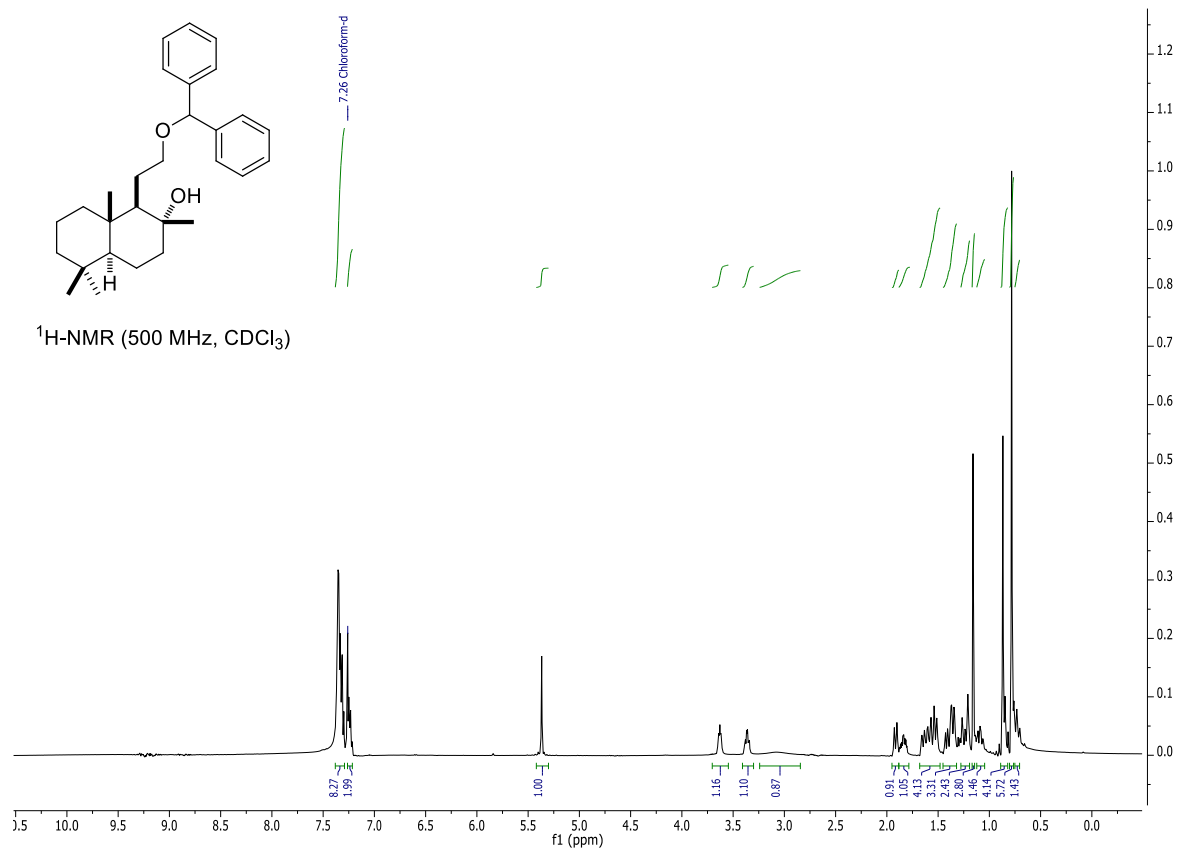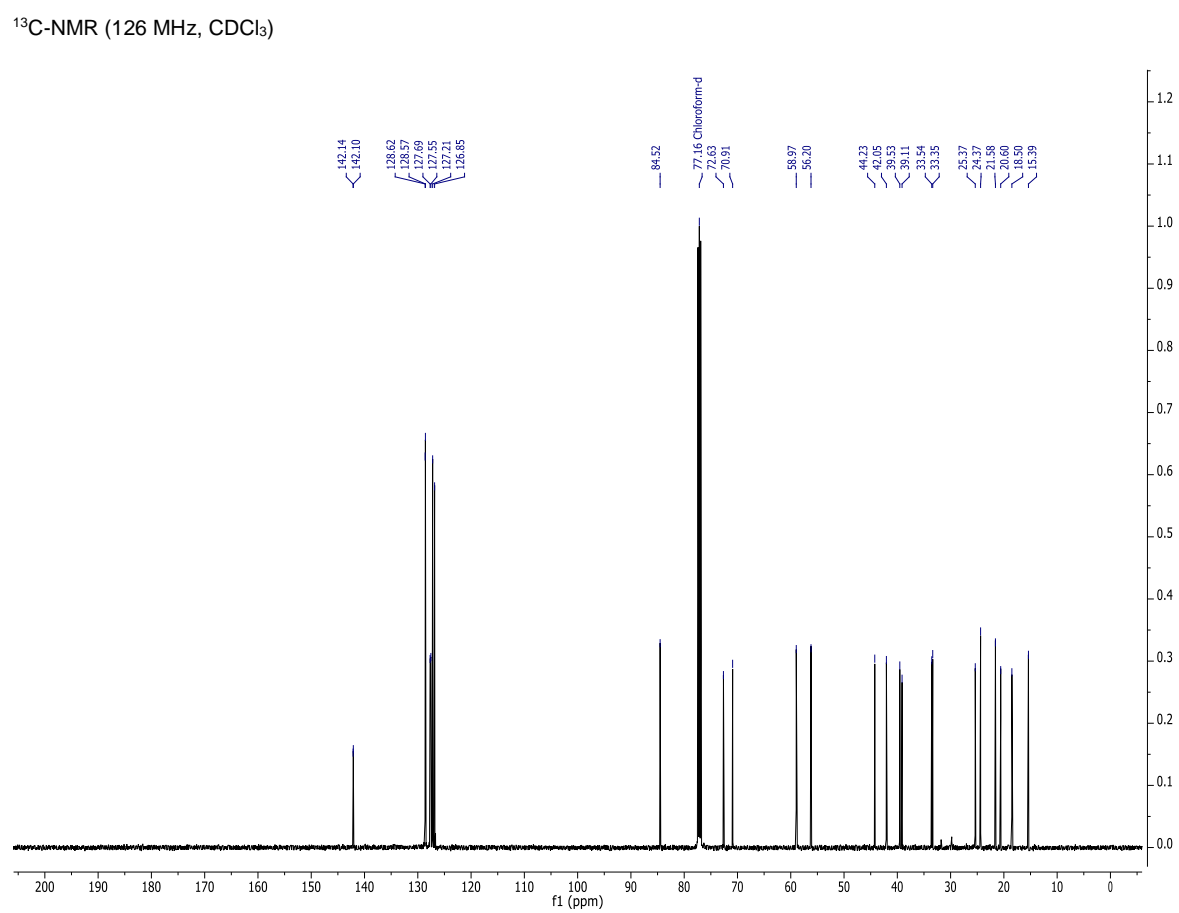

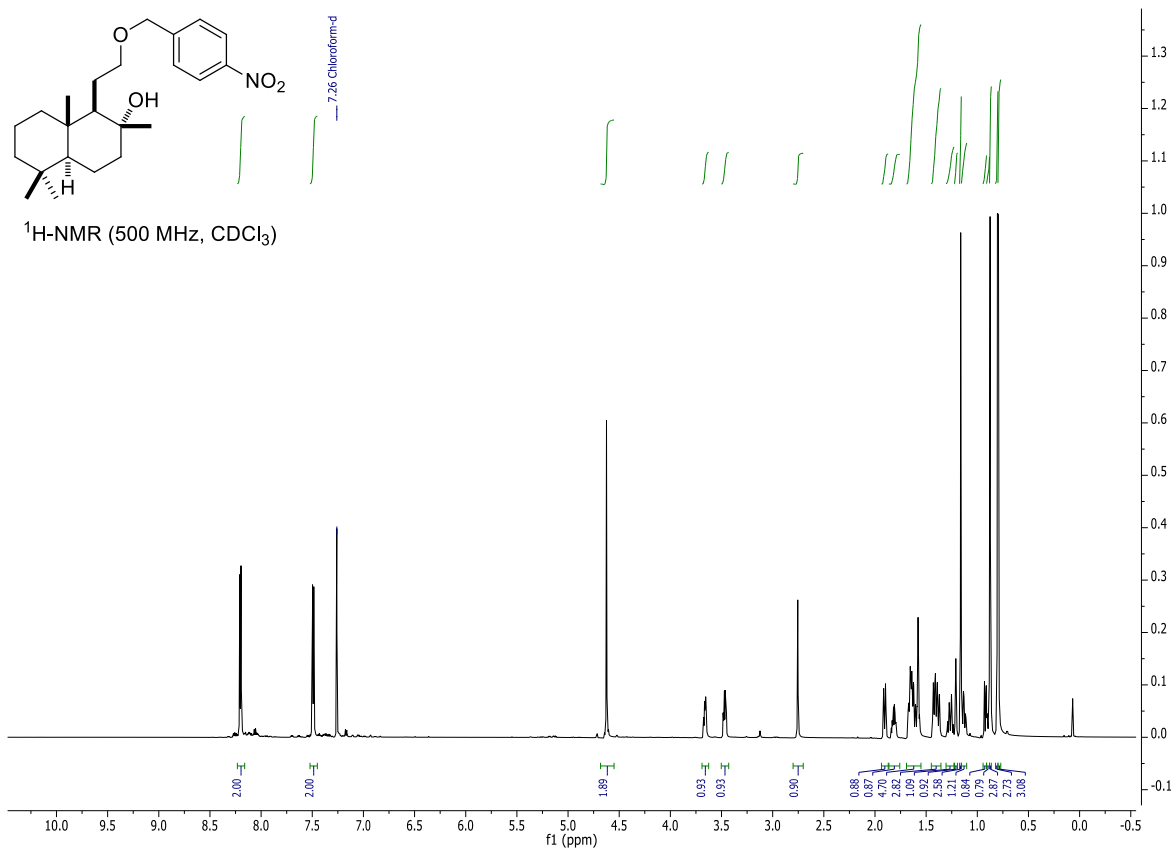

<sup>13</sup>C-NMR (126 MHz, CDCl<sub>3</sub>)

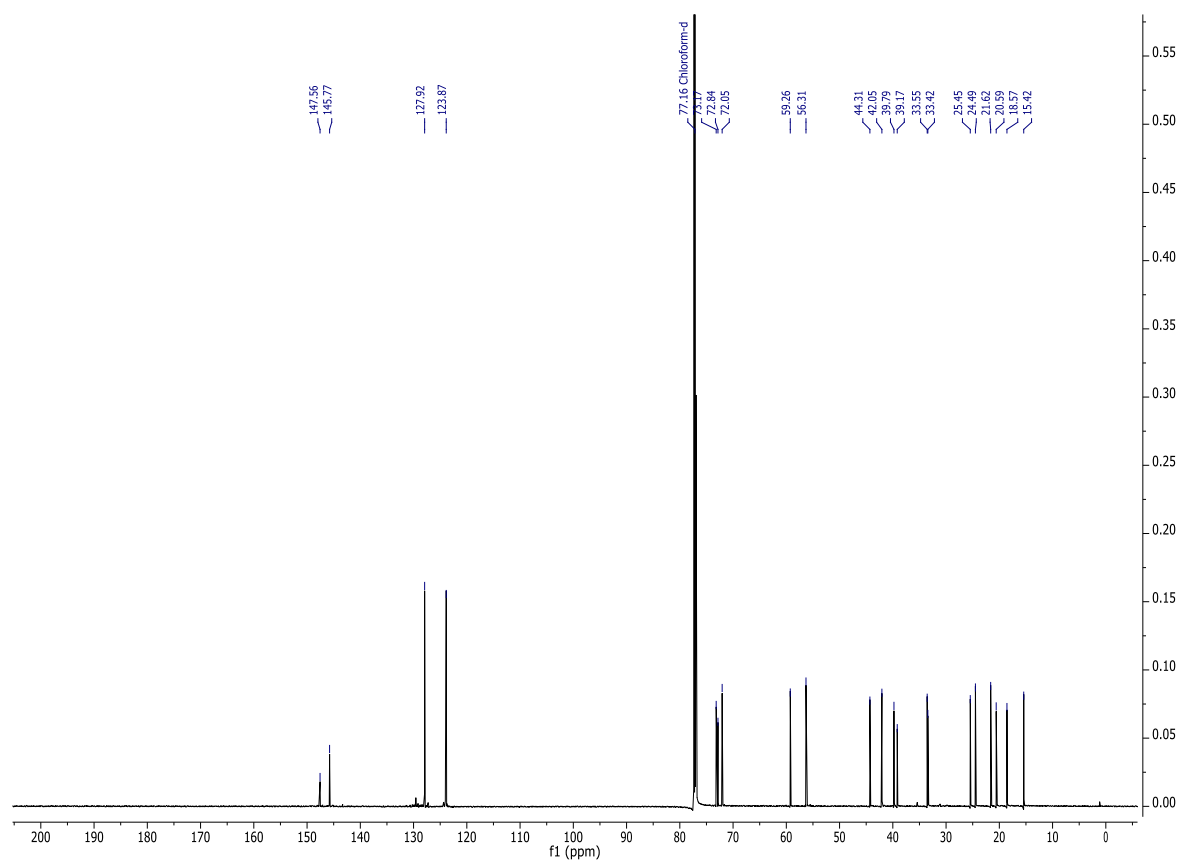

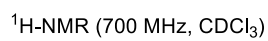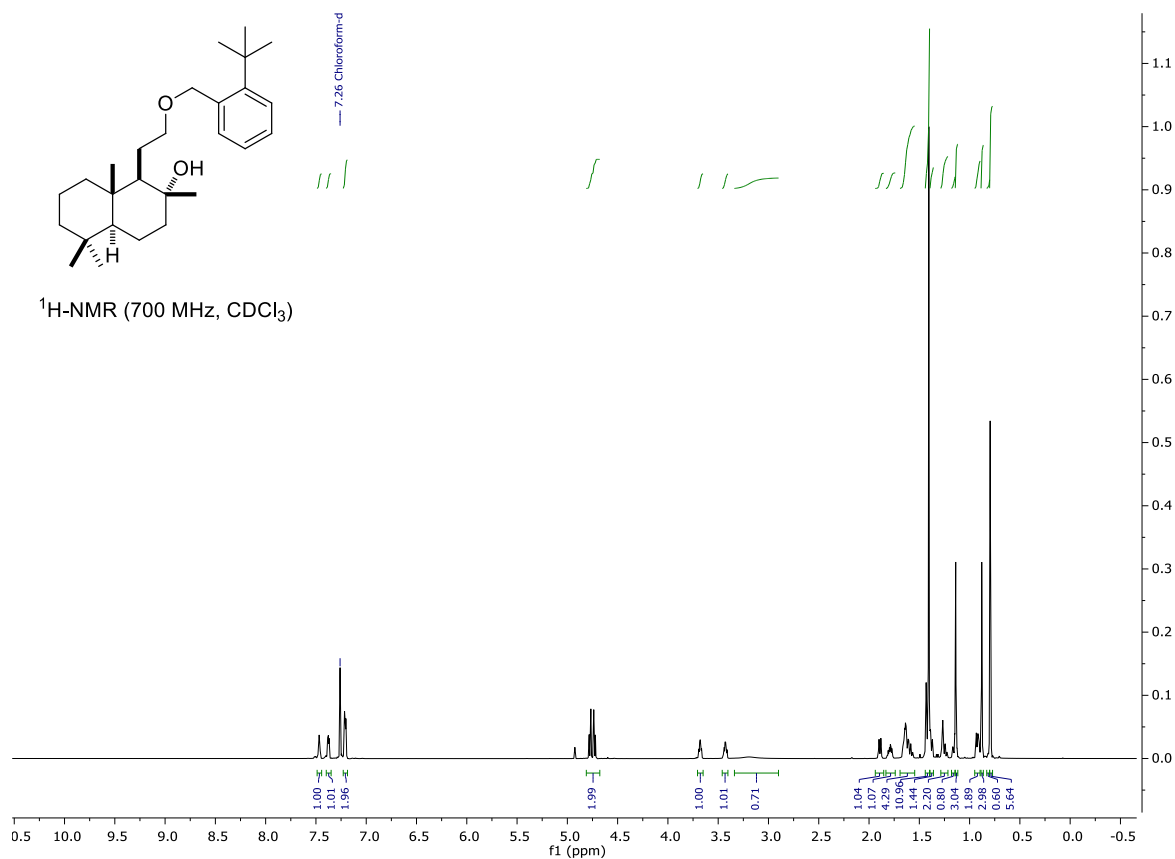 $^{13}\text{C}$ -NMR (176 MHz,  $\text{CDCl}_3$ )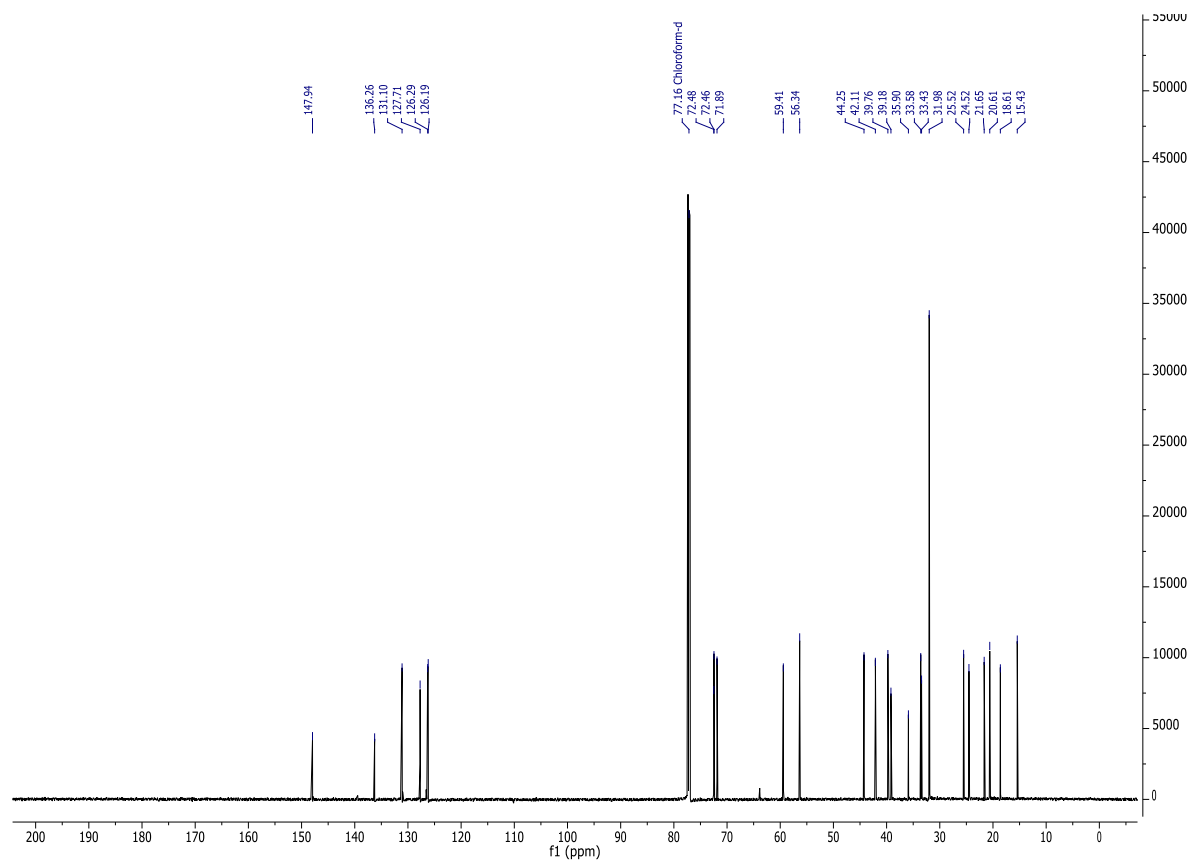

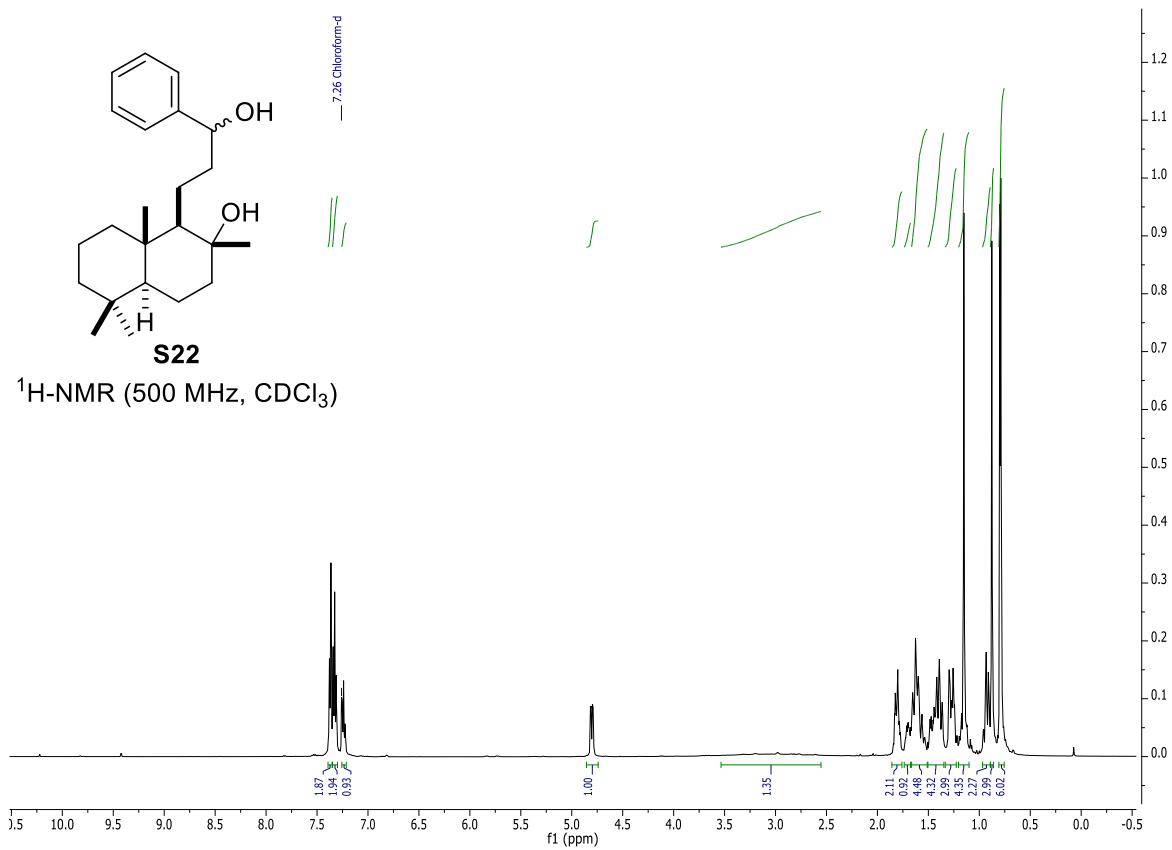

<sup>13</sup>C-NMR (126 MHz, CDCl<sub>3</sub>)

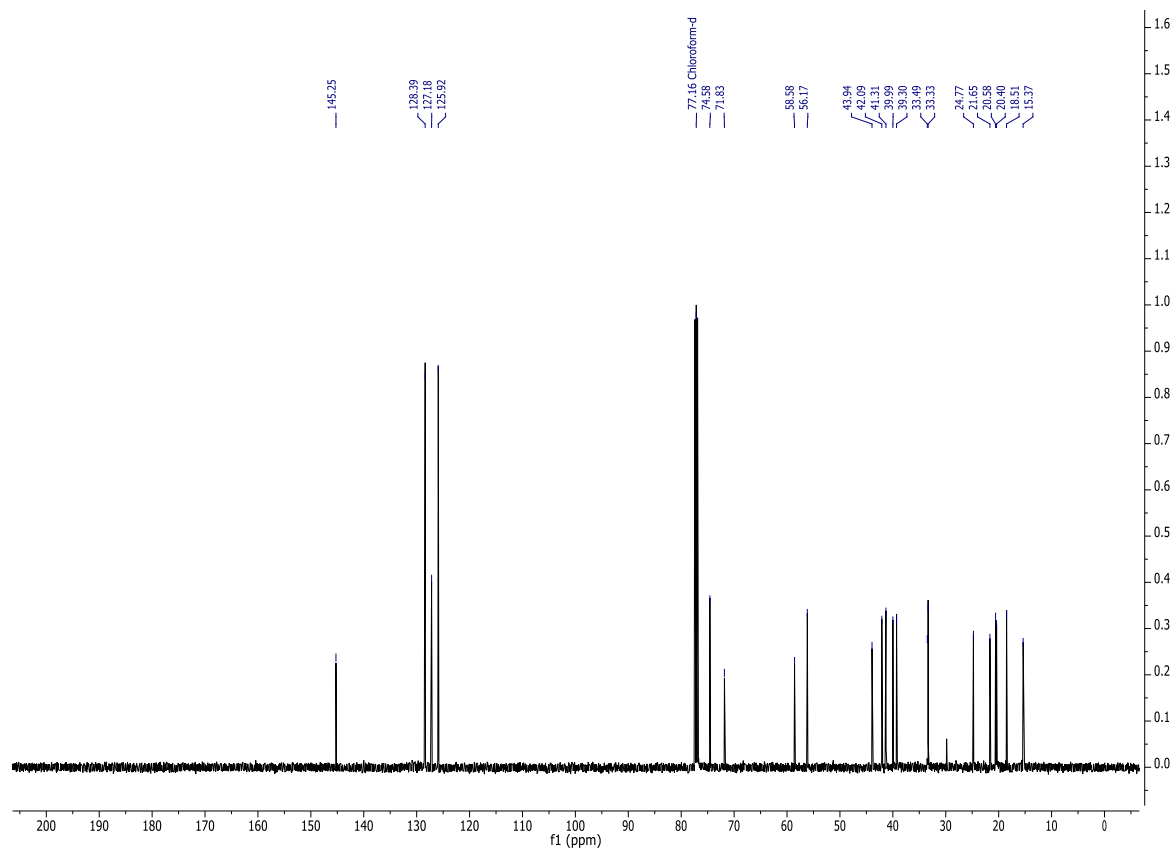

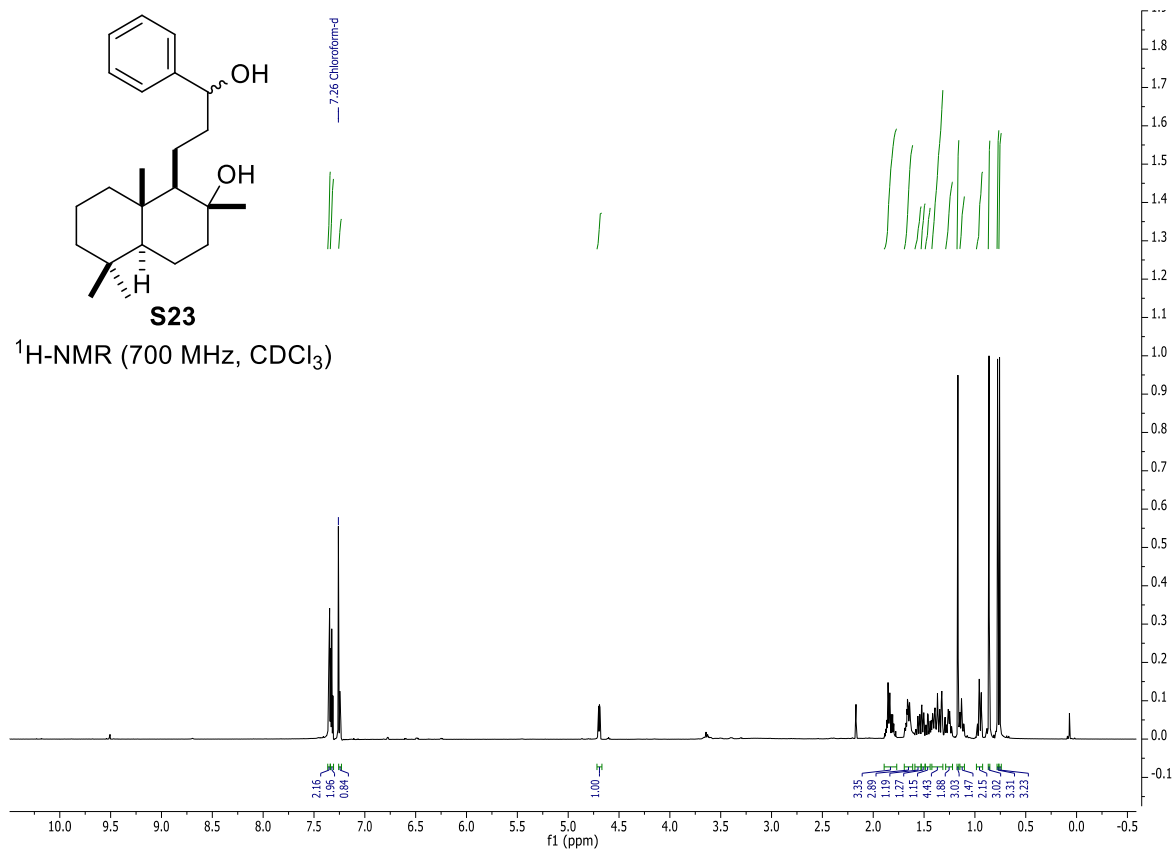

<sup>13</sup>C-NMR (176 MHz, CDCl<sub>3</sub>)

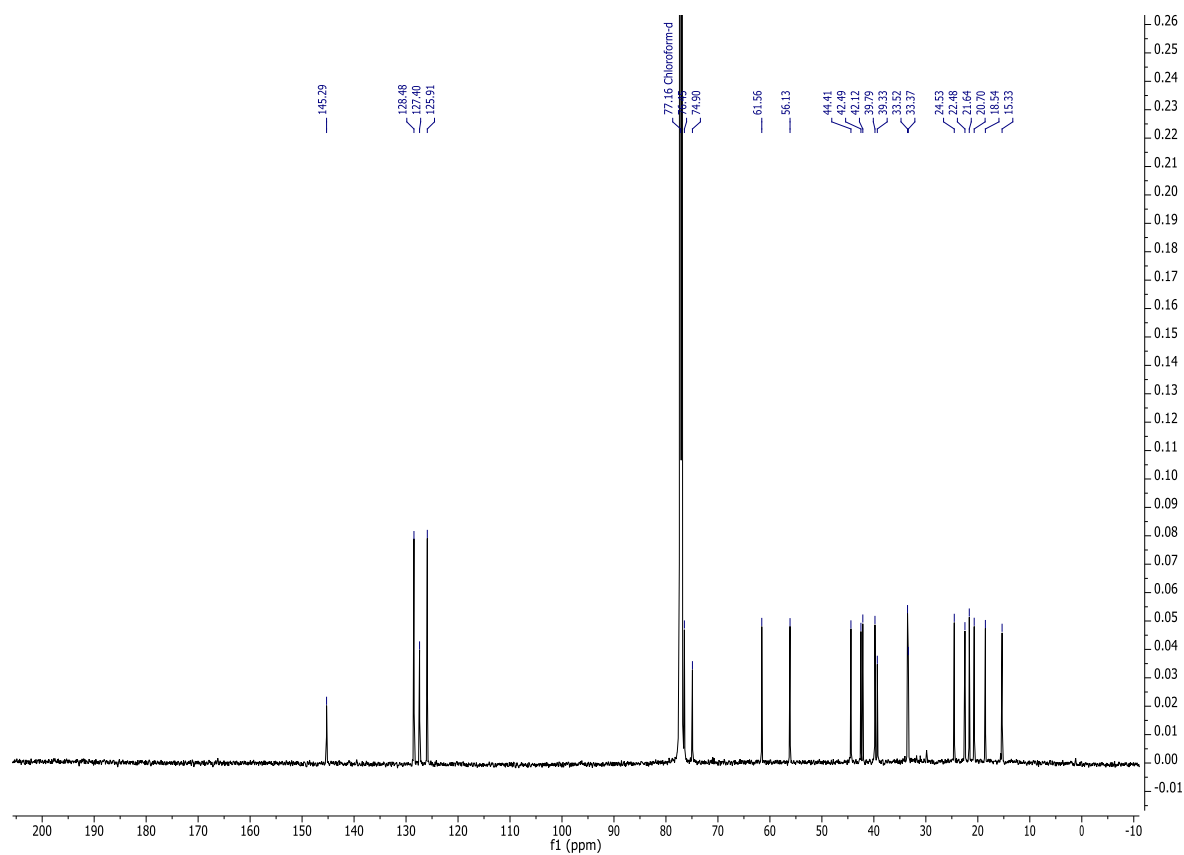

## 5. Literature Comparison: Polyene Cyclizations terminated by Aliphatic Alcohols

**Table 11** Selected examples of ring systems produced via polyene cyclization terminated by aliphatic alcohols.

| Entry | Number and ring size of carbocycles formed<br>(6 = Cyclohexane, 5 = Cyclopentane) | Oxygen containing ring formed | Nucleophile       | Reagents                                                                                                                                                               | Yield (ratio of cyclization products) | Lit.          |
|-------|-----------------------------------------------------------------------------------|-------------------------------|-------------------|------------------------------------------------------------------------------------------------------------------------------------------------------------------------|---------------------------------------|---------------|
| 1     | 6,6                                                                               | Tetrahydrofuran               | Primary alcohol   | 1. [Ir(COD)Cl] <sub>2</sub> (4 mol%), <b>R1</b> (16 mol%), Zn(OTf) <sub>2</sub> (20 mol%), DCE; 2. BF <sub>3</sub> ·OEt <sub>2</sub> , CH <sub>2</sub> Cl <sub>2</sub> | 79% (2 steps) (10:1, >99% <i>ee</i> ) | <sup>19</sup> |
| 2     | 6,6                                                                               | Tetrahydrofuran               | Primary alcohol   | ( <i>R</i> )-BINOL-Me·SnCl <sub>4</sub> , CH <sub>2</sub> Cl <sub>2</sub>                                                                                              | 54% (56 (42% <i>ee</i> ):26:9:9)      | <sup>20</sup> |
| 3     | 6,6                                                                               | Tetrahydrofuran               | Primary alcohol   | (dppe)PtI <sub>2</sub> (10 mol%), AgBF <sub>4</sub> (22 mol%), 2.1 Ph <sub>3</sub> COMe resin, EtNO <sub>2</sub>                                                       | 90%                                   | <sup>21</sup> |
| 4     | 6,6                                                                               | Tetrahydrofuran               | Primary alcohol   | FSO <sub>3</sub> H, 2-nitropropane                                                                                                                                     | 78% (40:35:2:1)                       | <sup>22</sup> |
| 5     | 6,6,5                                                                             | Tetrahydrofuran               | Secondary alcohol | picric acid, MeNO <sub>2</sub>                                                                                                                                         | 7                                     | <sup>23</sup> |
| 6     | 6,6                                                                               | Tetrahydrofuran               | Primary alcohol   | ClSO <sub>3</sub> H                                                                                                                                                    | 75% (1.2:1)                           | <sup>24</sup> |
| 7     | 6                                                                                 | Tetrahydropyran               | Tertiary alcohol  | ( <i>R</i> )-BINOL-Me·SnCl <sub>4</sub> , CH <sub>2</sub> Cl <sub>2</sub>                                                                                              | 58% (88 (56% <i>ee</i> ):12)          | <sup>20</sup> |
| 8     | 6                                                                                 | Tetrahydropyran               | Tertiary alcohol  | <b>R2</b> ·SnCl <sub>4</sub>                                                                                                                                           | 74% (81:19)                           | <sup>25</sup> |
| 9     | 6,6                                                                               | Tetrahydropyran               | Primary alcohol   | FSO <sub>3</sub> H, 2-nitropropane                                                                                                                                     | 70%                                   | <sup>26</sup> |
| 10    | 6,6                                                                               | Tetrahydropyran               | Secondary alcohol | Hg(TFA) <sub>2</sub> , C <sub>6</sub> H <sub>5</sub> N(CH <sub>3</sub> ) <sub>2</sub> , then NaCl                                                                      | 15%                                   | <sup>27</sup> |
| 11    | 6,6                                                                               | Tetrahydropyran               | Primary alcohol   | PhSeOTf                                                                                                                                                                | 7%                                    | <sup>28</sup> |

|    |     |         |                   |                                                                                                |             |           |
|----|-----|---------|-------------------|------------------------------------------------------------------------------------------------|-------------|-----------|
| 12 | 6   | Oxepane | Secondary alcohol | Hg(TFA) <sub>2</sub> , MeNO <sub>2</sub> then KBr, Br <sub>2</sub> , O <sub>2</sub> , LiBr, py | 30% (1:1)   | 29        |
| 13 | 6   | Oxepane | Secondary alcohol | 2,4,4,6-tetrabromo-cyclohexa-2,5-dienone, MeNO <sub>2</sub>                                    | 12% (19:81) | 30        |
| 14 | 6   | Oxepane | Secondary alcohol | Hg(TFA) <sub>2</sub> , MeNO <sub>2</sub> then KBr, Br <sub>2</sub> , O <sub>2</sub> , LiBr, py | 29% (3.1:1) | 31        |
| 15 | 6,6 | Oxepane | Tertiary alcohol  | squalene cyclase from <i>Alicyclobacillus acidocaldarius</i>                                   | 19.3%       | 32        |
| 16 | 6,6 | Oxepane | Tertiary alcohol  | BmeTC                                                                                          | 18% (64:36) | 9         |
| 17 | 6,6 | Oxepane | Tertiary alcohol  | EtAlCl <sub>2</sub> , CH <sub>2</sub> Cl <sub>2</sub>                                          | 32% (1.7:1) | This work |

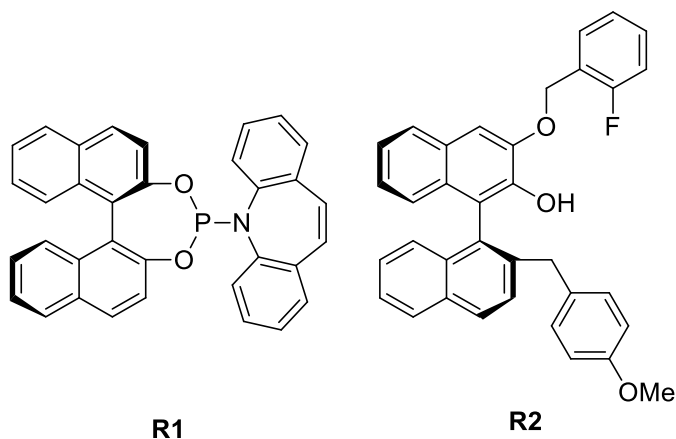

These examples highlight the difficult formation of fused ring systems containing oxepane rings with tertiary alcohols in polyene cyclizations, as previously only enzymatic transformations of this kind were known (Entry 15 and 16). Furthermore, the examples indicate that EtAlCl<sub>2</sub>, while being widely used in polyene cyclizations terminated by allylsilanes and silyl enol ethers,<sup>33</sup> has not been used frequently in alcohol terminated polyene cyclizations and therefore this constitutes an extension of the previously known scope of terminating nucleophiles.

## 6. Enzymatic Studies

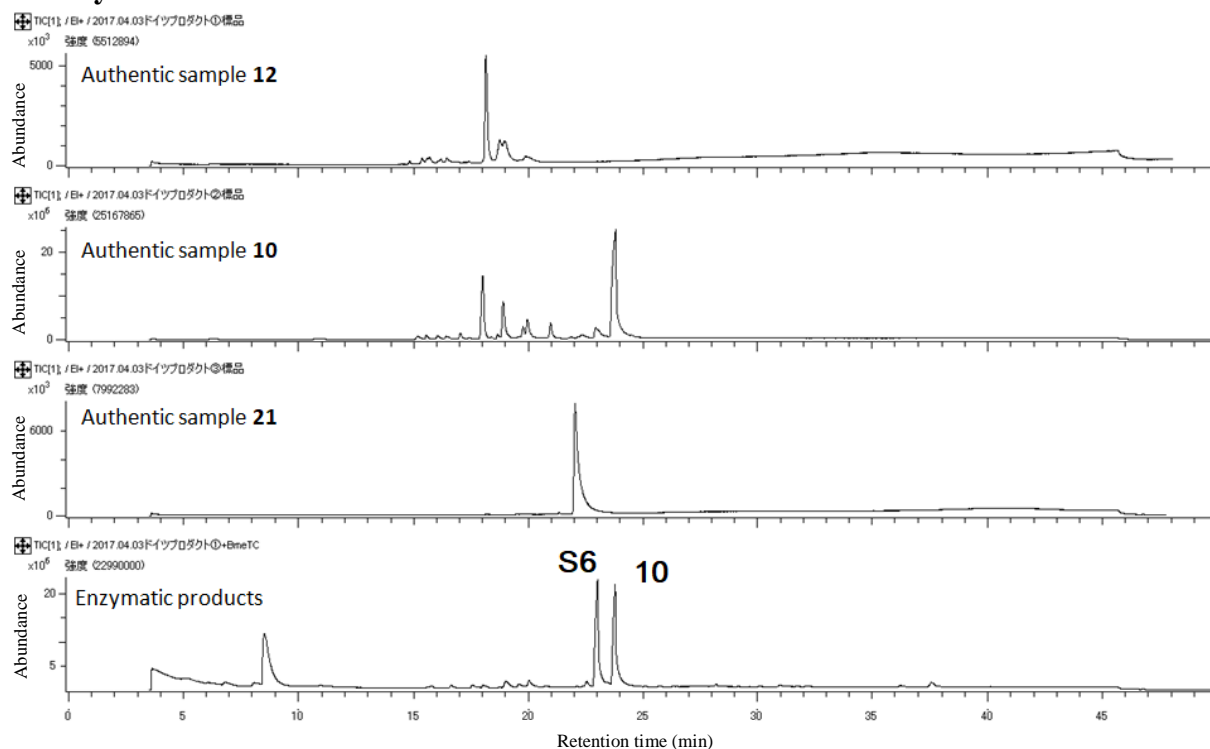

**Fig. 2** Top: GC-MS chromatogram of authentic **12**. Second from the top: GC-MS chromatogram of authentic **10** (possible partial degradation due to transportation). Third from the top: GC-MS chromatogram of authentic **21**. Bottom: GC-MS chromatogram of the reaction products of **12** with BmeTC. All measurements performed with "GC-MS Niigata".

The mass spectrometric studies indicated that one of the products formed from the enzymatic reaction of **12** with BmeTC (Fig. 2, Bottom) has a similar GC-MS retention time and comparable GC-MS mass spectrum as authentic **10** (Fig. 2, Second from the top and Fig. 3 respectively). In addition, **21** could not be detected in the enzymatic reaction mixture (within the limits of detection) (Fig. 4).

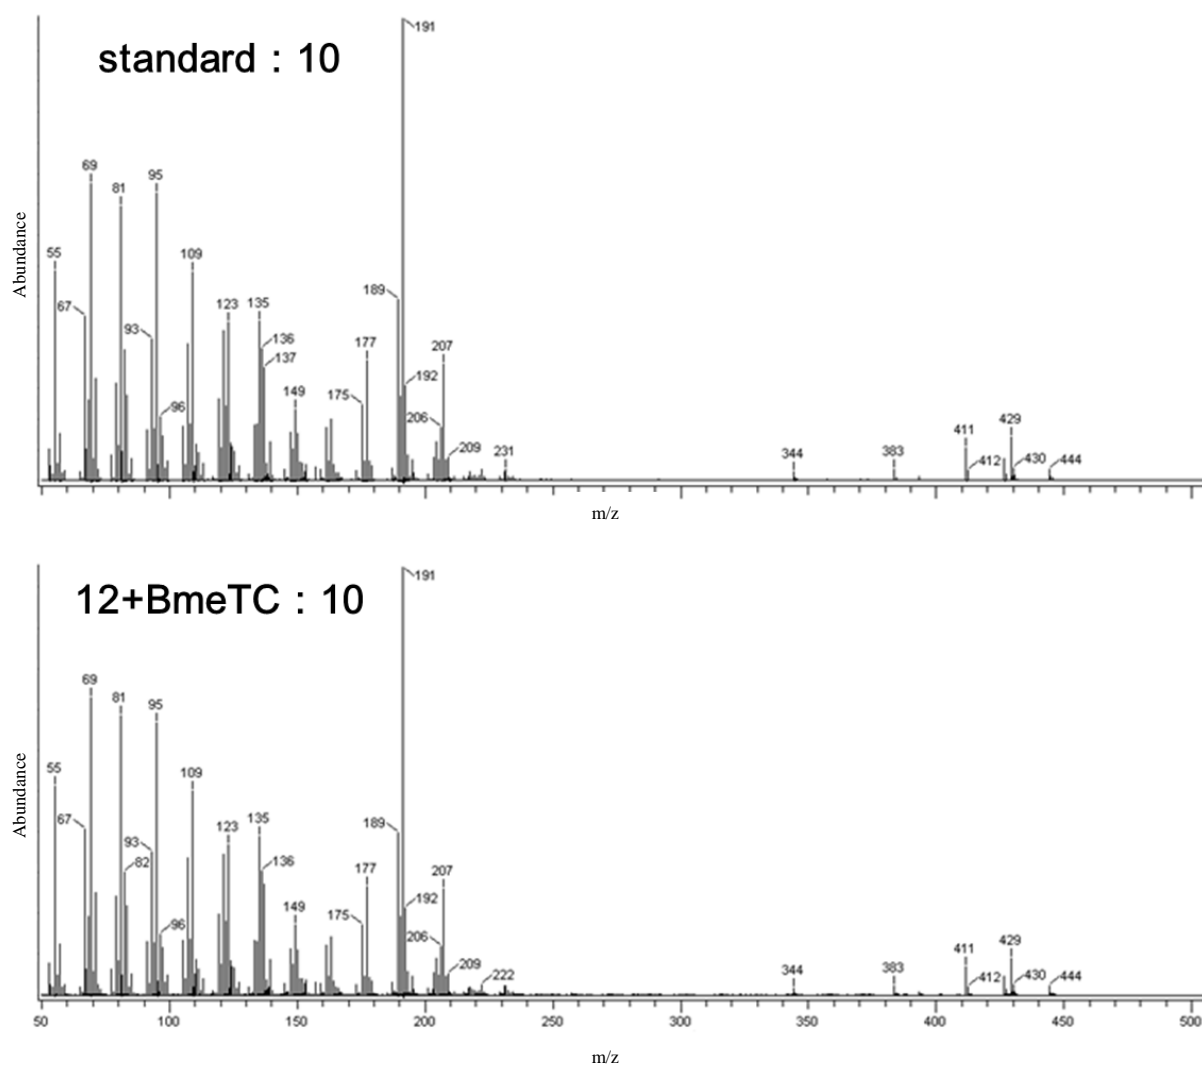

**Fig. 3** Top: GC-MS mass spectrum of authentic **10** (measured with "GC-MS Niigata"). Bottom: GC-MS mass spectrum of enzymatic reaction product with a similar retention time as authentic **10** (measured with "GC-MS Niigata").

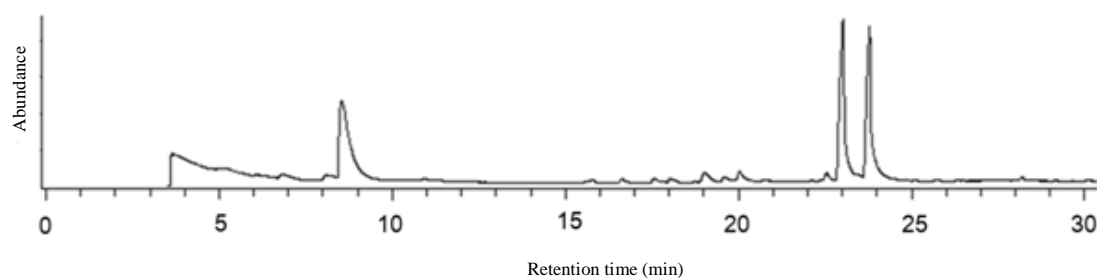

**Fig. 4** Zoom in the GC-MS chromatogram of the reaction of **12** with BmeTC (measured with "GC-MS Niigata").

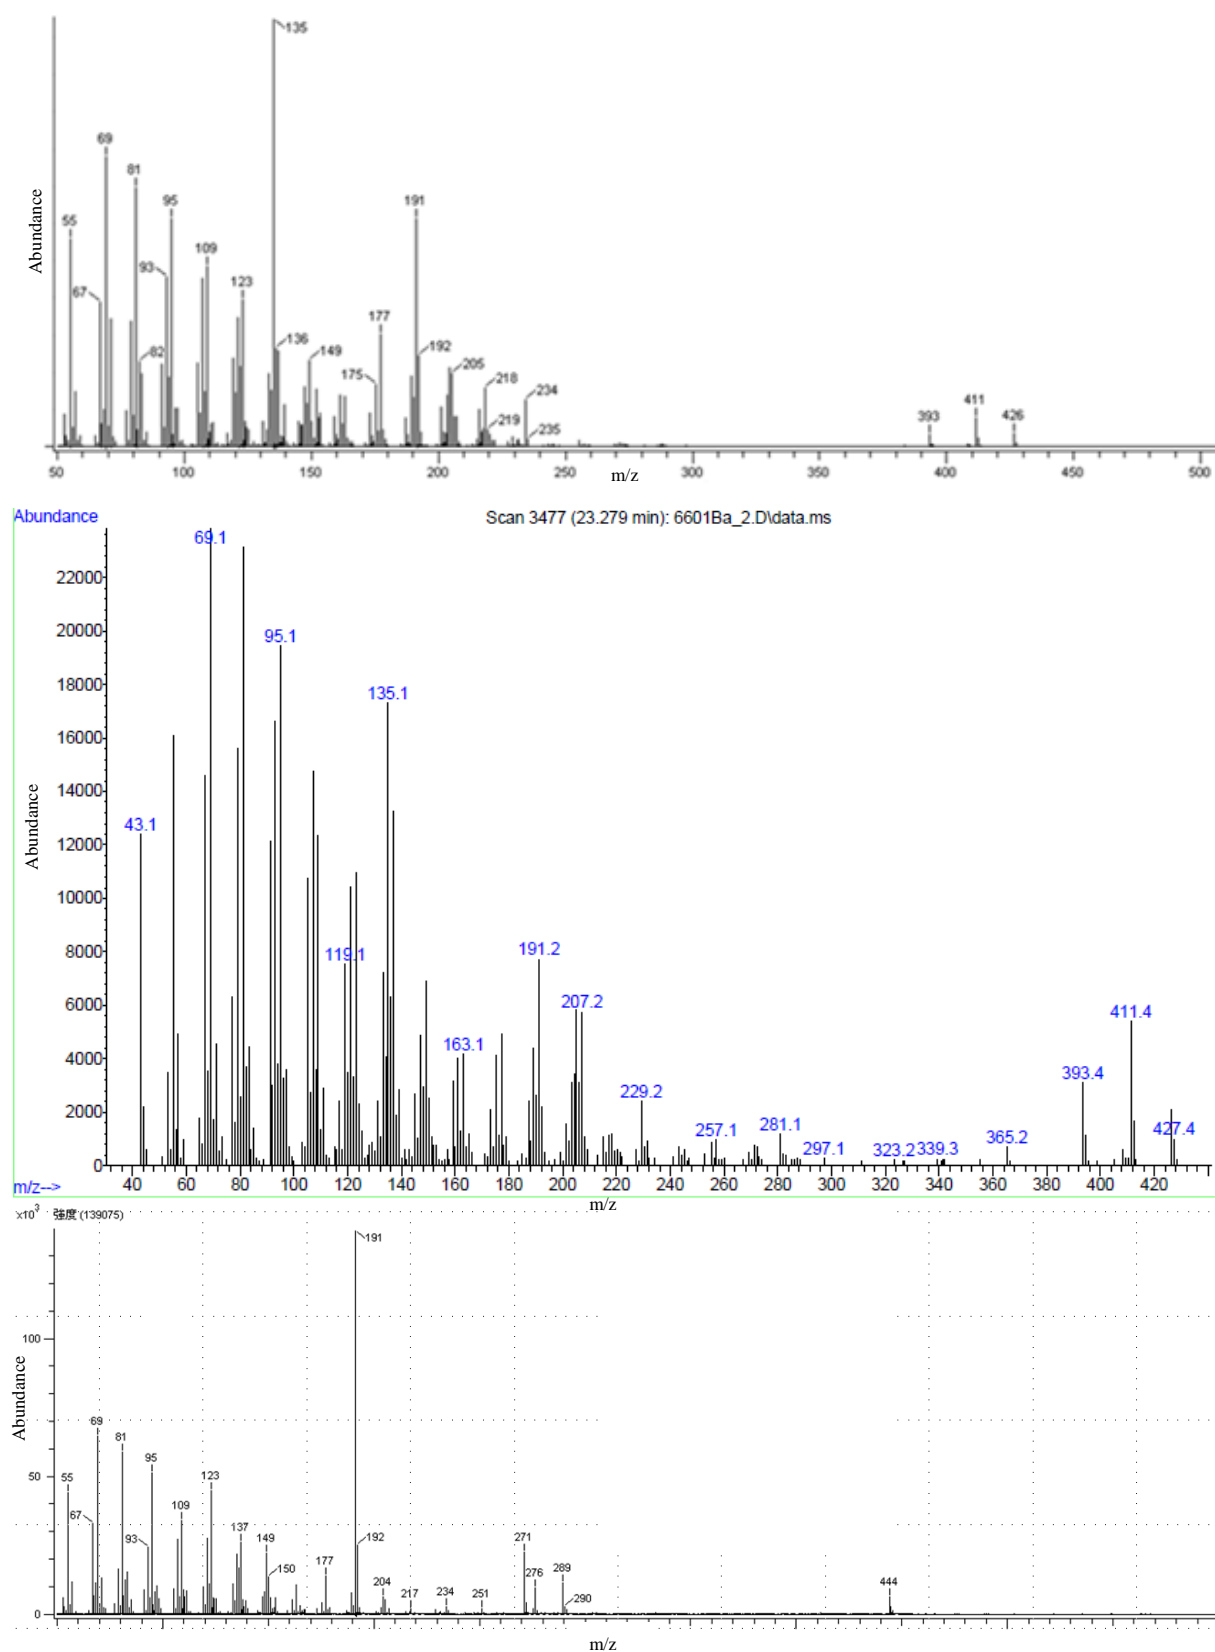

**Fig. 5** Top: GC-MS mass spectrum of compound **S6** from the reaction of **12** with BmeTC (measured with "GC-MS Niigata"). Middle: GC-MS mass spectrum of authentic **S6** (measured with "GC-MS Berlin"). Bottom: GC-MS mass spectrum of authentic compound **21** (measured with "GC-MS Niigata").

Mass spectrometric studies indicated that the fragmentation pattern of **S6** synthesized from the enzymatic reaction of **12** with BmeTC (Fig. 2 Bottom and Fig. 5 Top) shows similarities to the fragmentation pattern of **S6** synthesized from  $\alpha$ -onocerin **6**<sup>15</sup> by mono deoxygenation (Fig. 5 Middle; **S6**, for the synthesis see page 29 in the Supporting Information).<sup>34</sup> While the relative configuration and the possible hydration level of the elimination product could not be elucidated, its connectivity resembles **S6**. The tetracyclic product results from an epoxypolyene dicyclization followed by elimination.

#### "GC-MS Niigata":

GC-MS (injection temperature, 300°C; oven temperature, 220–300°C at an increment of 3°C min<sup>-1</sup>) was performed on a JMS-T100GCV spectrometer (JEOL) equipped with a DB-1 capillary column (30 m  $\times$  0.25 mm  $\times$  0.25  $\mu$ m; J&W Scientific, Inc.), using the EI mode operated at 70 eV. HRMS was performed on a JMS-T100LP spectrometer (JEOL) using ESI mode.

#### "GC-MS Berlin":

GC/MS system consisting of a 5977E MSD single-quadrupole mass spectrometer (EI-Mode (70 eV)) with a 7820A GC by Agilent Technologies (Agilent 190915-433UI, 30 m  $\times$  250  $\mu$ m  $\times$  0.25  $\mu$ m). Injection temperature: 300 °C, column temperature: 220-300 °C (increment 3 °C/min).

#### Enzymatic assay for BmeTC

*Escherichia coli* BL21(DE3) harboring pColdTF-BmeTC was grown at 37°C in LB medium (1 L) with 100  $\mu$ g mL<sup>-1</sup> ampicillin. Expression of the recombinant protein was induced by adding 0.1 mM isopropyl  $\beta$ -D-1-thiogalactopyranoside when the OD<sub>600</sub> reached ~0.6. Further cultivation of BL21(DE3) recombinants was performed for 24 h at 15°C. *E. coli* cells expressing recombinant BmeTC were harvested by centrifugation and resuspended in 15 mL/5 g *E. coli* cells of buffer A containing 50 mM Tris-HCl (pH 7.5), 2.5 mM dithiothreitol, 1 mM EDTA, and 0.1% Tween80. The cells were disrupted by sonication with UP200s (Hielscher Ultrasonics GmbH, Teltow, Germany) at 4–10°C for 40 min. The resulting suspension was centrifuged at 10,000  $\times$  g for 20 min. The pellet was discarded, and the resulting supernatant was used as a cell-free extract. The reaction mixture for analyzing the enzymatic activity of BmeTC contained substrate **12** (0.1 mg) emulsified with Tween80 (2 mg) in buffer A (1 mL), and 4 mL of cell-free extract containing BmeTC in a total volume of 5 mL. The reaction was carried out at 30°C for 64 h and terminated by using a 15% KOH/MeOH solution (6 mL). The lipophilic enzymatic product was extracted from the incubation mixtures with *n*-hexane (5 mL  $\times$  3). Tween80 detergent was removed by passing the extract through a short SiO<sub>2</sub> column (*n*-hexane: EtOAc = 100:20) and then subjecting the eluent to GC-MS.

## 7. Density Functional Calculations

### List of Contents

|                          |     |
|--------------------------|-----|
| Gaussian Full Reference  | 115 |
| Methods-QCC analysis     | 115 |
| Scheme S1                | 116 |
| Key                      | 116 |
| Figure S1                | 117 |
| Figure S2                | 118 |
| Figure S3                | 119 |
| Figure S4                | 120 |
| Figure S5                | 121 |
| Figure S6                | 122 |
| Figure S7                | 123 |
| Table S1                 | 124 |
| Coordinates and Energies | 124 |
| Figure S1                | 124 |
| Figure S2                | 135 |
| Figure S3                | 153 |
| Figure S4                | 164 |
| Figure S5                | 186 |
| Figure S6                | 196 |
| Figure S7                | 222 |

## Gaussian Full Reference

*Gaussian 09, Revision D.01*

M. J. Frisch, G. W. Trucks, H. B. Schlegel, G. E. Scuseria, M. A. Robb, J. R. Cheeseman, G. Scalmani, V. Barone, B. Mennucci, G. A. Petersson, H. Nakatsuji, M. Caricato, X. Li, H. P. Hratchian, A. F. Izmaylov, J. Bloino, G. Zheng, J. L. Sonnenberg, M. Hada, M. Ehara, K. Toyota, R. Fukuda, J. Hasegawa, M. Ishida, T. Nakajima, Y. Honda, O. Kitao, H. Nakai, T. Vreven, J. A. Montgomery, Jr., J. E. Peralta, F. Ogliaro, M. Bearpark, J. J. Heyd, E. Brothers, K. N. Kudin, V. N. Staroverov, T. Keith, R. Kobayashi, J. Normand,

K. Raghavachari, A. Rendell, J. C. Burant, S. S. Iyengar, J. Tomasi, M. Cossi, N. Rega, J. M. Millam, M. Klene, J. E. Knox, J. B. Cross, V. Bakken, C. Adamo, J. Jaramillo, R. Gomperts, R. E. Stratmann, O. Yazyev, A. J. Austin, R. Cammi, C. Pomelli, J. W. Ochterski, R. L. Martin, K. Morokuma, V. G. Zakrzewski, G. A. Voth, P. Salvador, J. J. Dannenberg, S. Dapprich, A. D. Daniels, O. Farkas, J. B. Foresman, J. V. Ortiz, J. Cioslowski, and D. J. Fox, Gaussian, Inc., Wallingford CT, 2013.

## Methods-QCC analysis

Calculations were performed with GAUSSIAN09.<sup>35</sup> Geometries were optimized using the B3LYP method with the basis set of 6-31G(d).<sup>36</sup> All stationary points were characterized as minima or transition state structures using frequency calculations at the same level. All reported energies include zero-point energy corrections (unscaled) from the frequency calculations at the same level. Intrinsic reaction coordinate (IRC) calculations were used for further characterization of transition state structures.<sup>37</sup> mPW1PW91//6-31+G(d,p)<sup>38</sup> energies are also shown, since it is known that B3LYP underestimates the relative energies of cyclic structures versus acyclic isomers.<sup>38</sup> These energies do not include zero-point energy corrections. The validity of this computational approach for examining terpene-forming carbocation rearrangements is well-established.<sup>39</sup> Structural images were created with *Ball&Stick*.<sup>40</sup>

**Scheme S1 |**

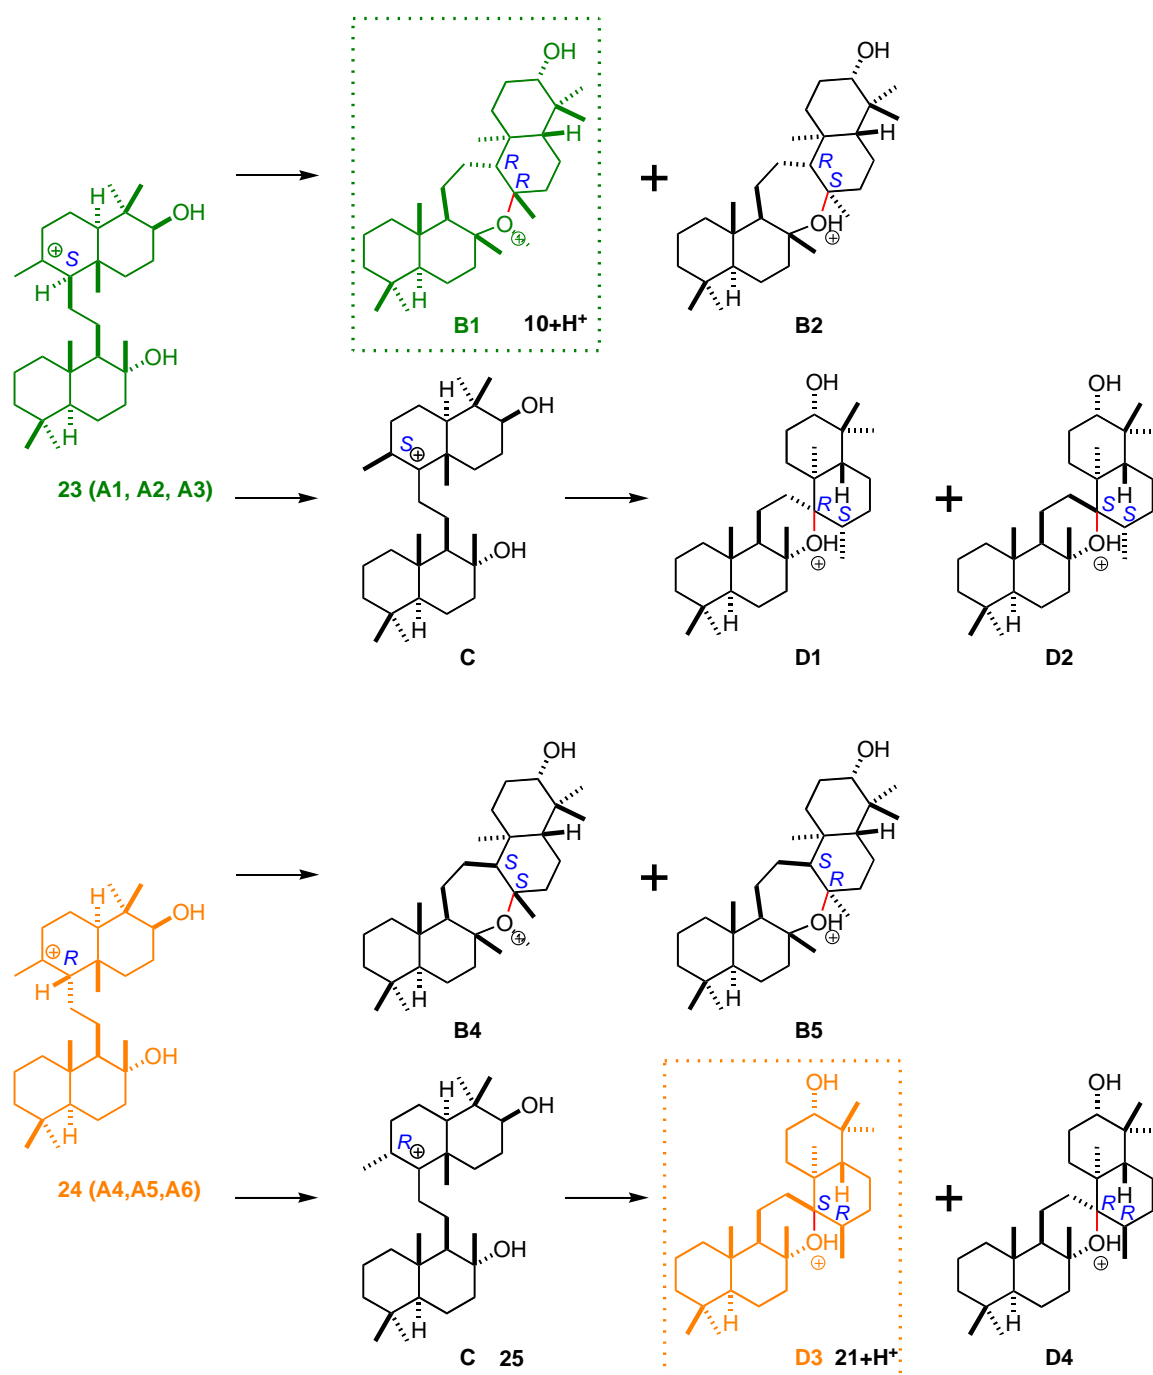

**Key**

Capital letters are used to label carbocations and subsequent numbers to discern different conformers or stereoisomers.

Structures A1, A2 and A3 in the Supporting Information are conformers of the structure **23** in the manuscript.

B1 in the Supporting Information corresponds **10**+H<sup>+</sup> in the manuscript.

The structures A4, A5 and A6 in the Supporting Information are conformers of the structure **24** in the manuscript.

D3 in the Supporting Information corresponds **21**+H<sup>+</sup> in the manuscript.

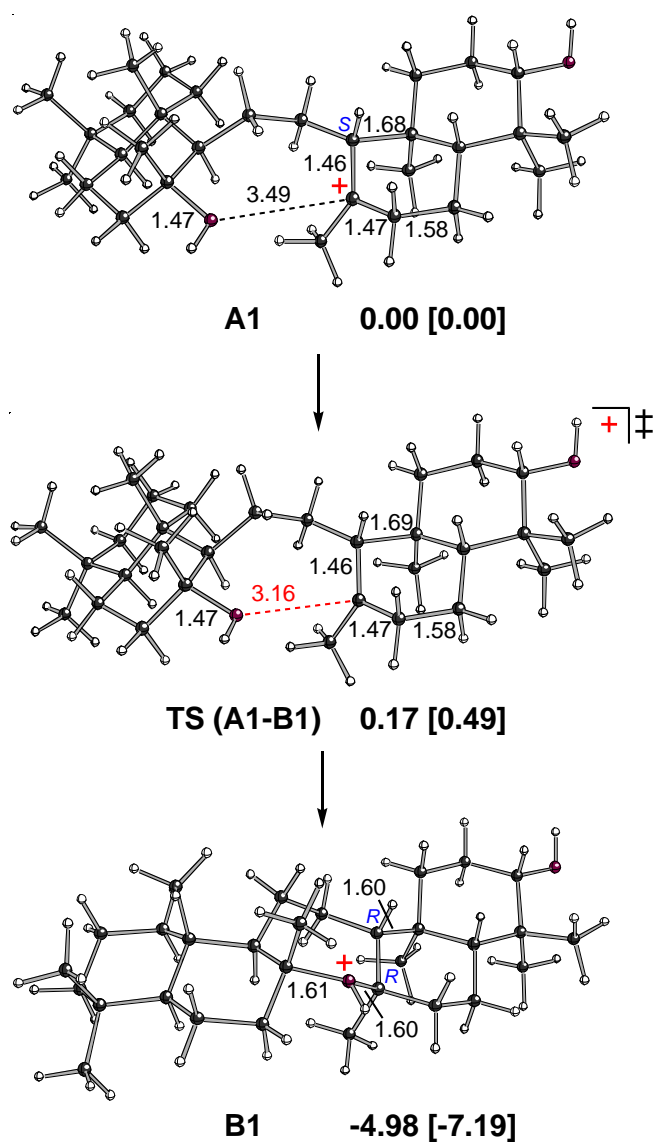

**Figure S1 | Formation of B1 (10+H<sup>+</sup>).** Energies (kcal/mol; B3LYP/6-31G(d)//B3LYP/6-31G(d) in normal texts and mPW1PW91/6-31+G(d,p)//B3LYP/6-31G(d) in brackets) are shown.

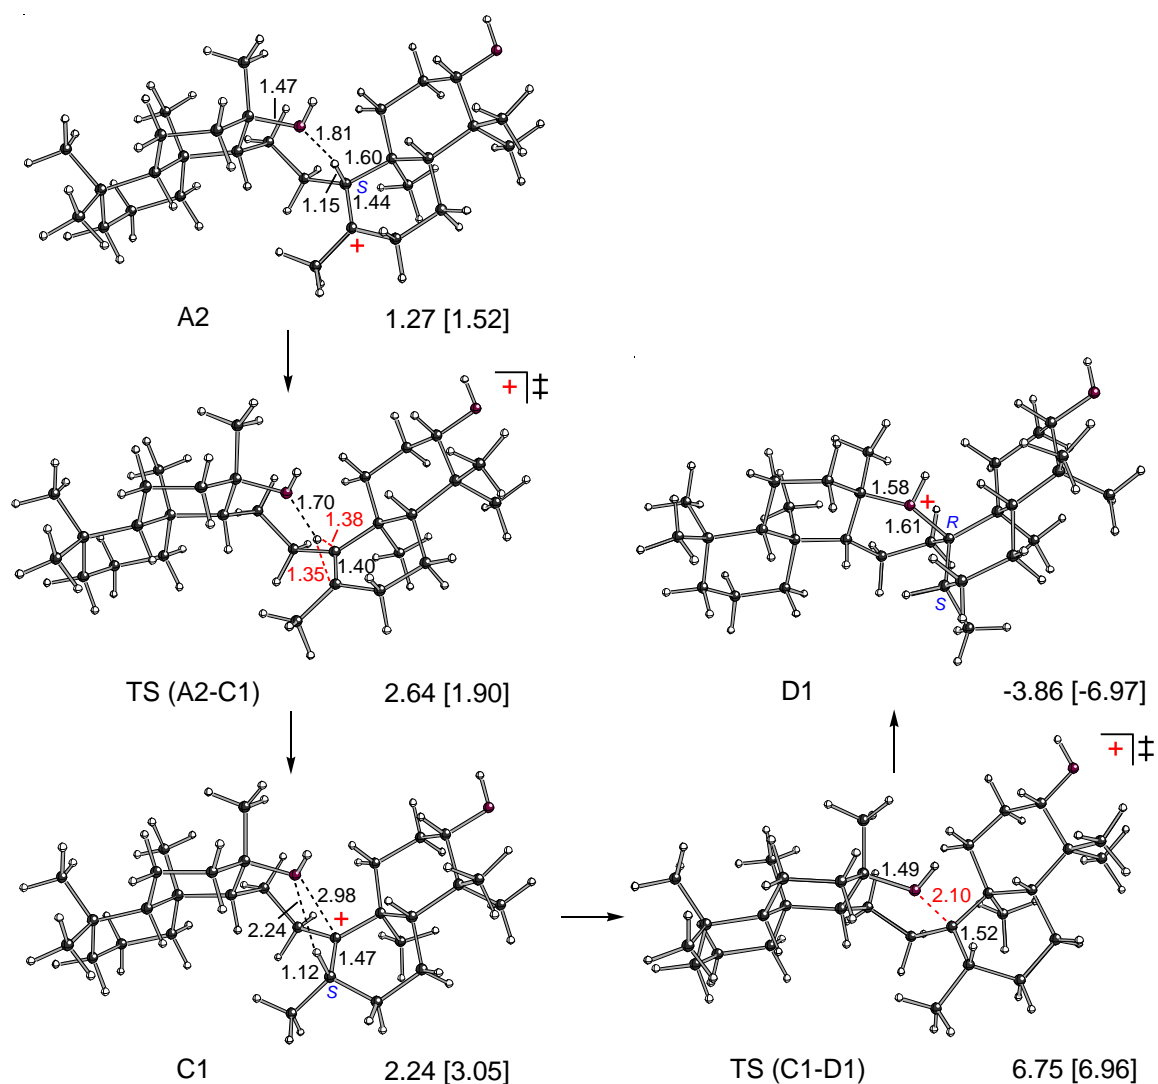

**Figure S2** | Formation of **D1**. Energies (kcal/mol; B3LYP/6-31G(d)//B3LYP/6-31G(d) in normal texts and mPW1PW91/6-31+G(d,p)//B3LYP/6-31G(d) in brackets) are shown. 1,2-Hydride shift step has a barrier of <1kcal/mol.

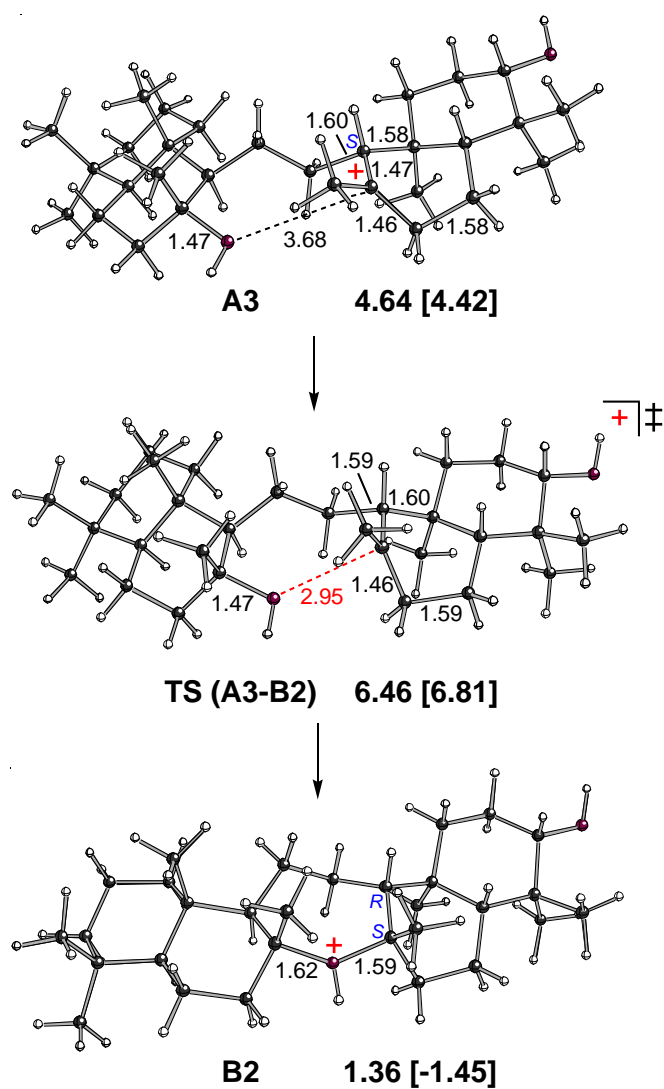

**Figure S3** | Formation of **B2**. Energies (kcal/mol; B3LYP/6-31G(d)//B3LYP/6-31G(d) in normal texts and mPW1PW91/6-31+G(d,p)//B3LYP/6-31G(d) in brackets) are shown.

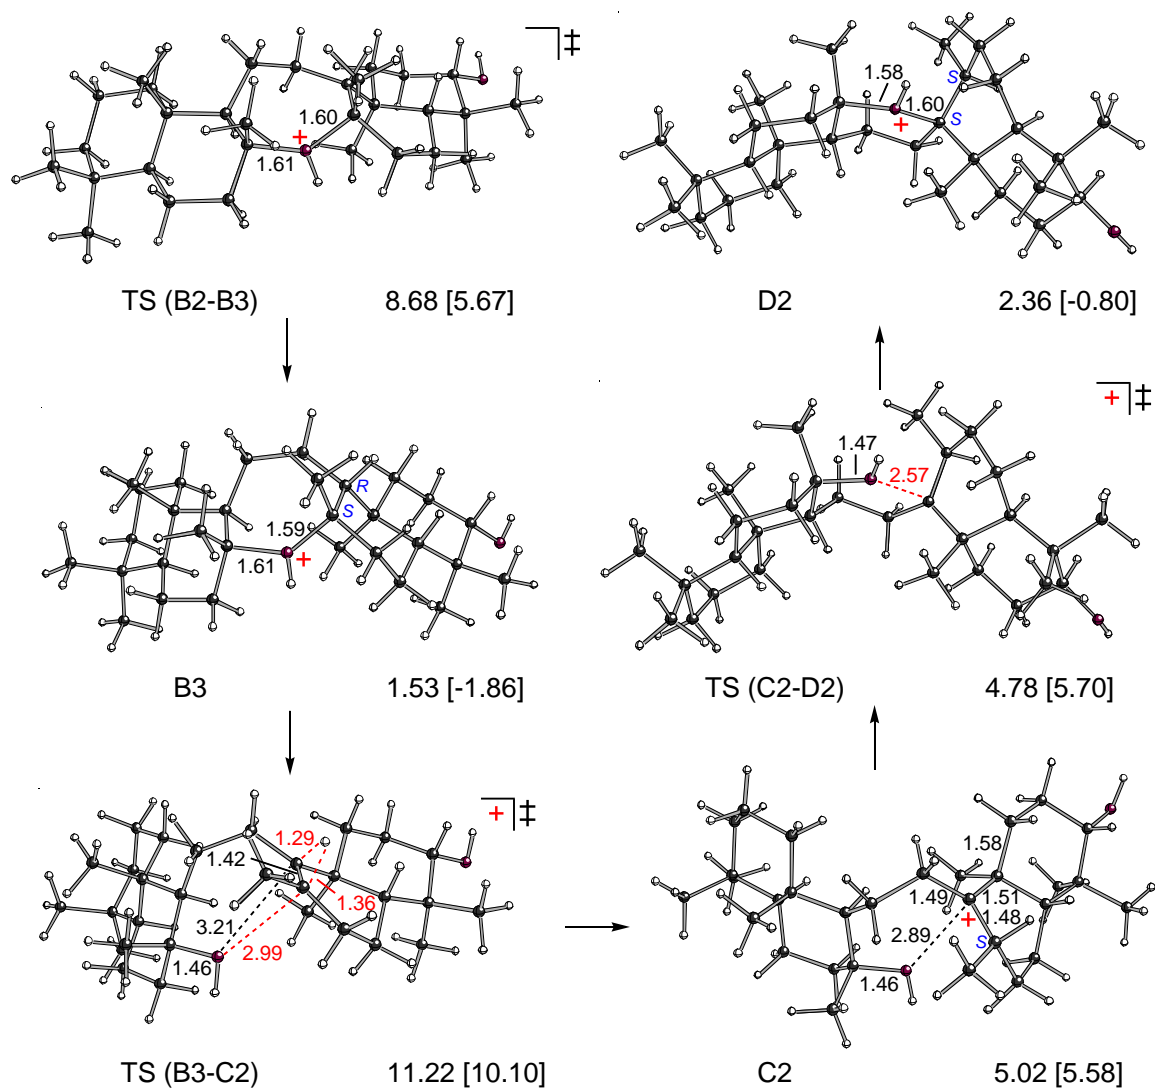

Figure S4| Formation of **D2**. Energies (kcal/mol; B3LYP/6-31G(d)//B3LYP/6-31G(d) in normal texts and mPW1PW91/6-31+G(d,p)//B3LYP/6-31G(d) in brackets) are shown. The  $B3 \rightarrow C2$  conversion is a concerted reaction combined with ring opening/1,2-hydride shifting events. See Figure 2 for a different 1,2-hydride shift, which has a significantly smaller energy barrier.

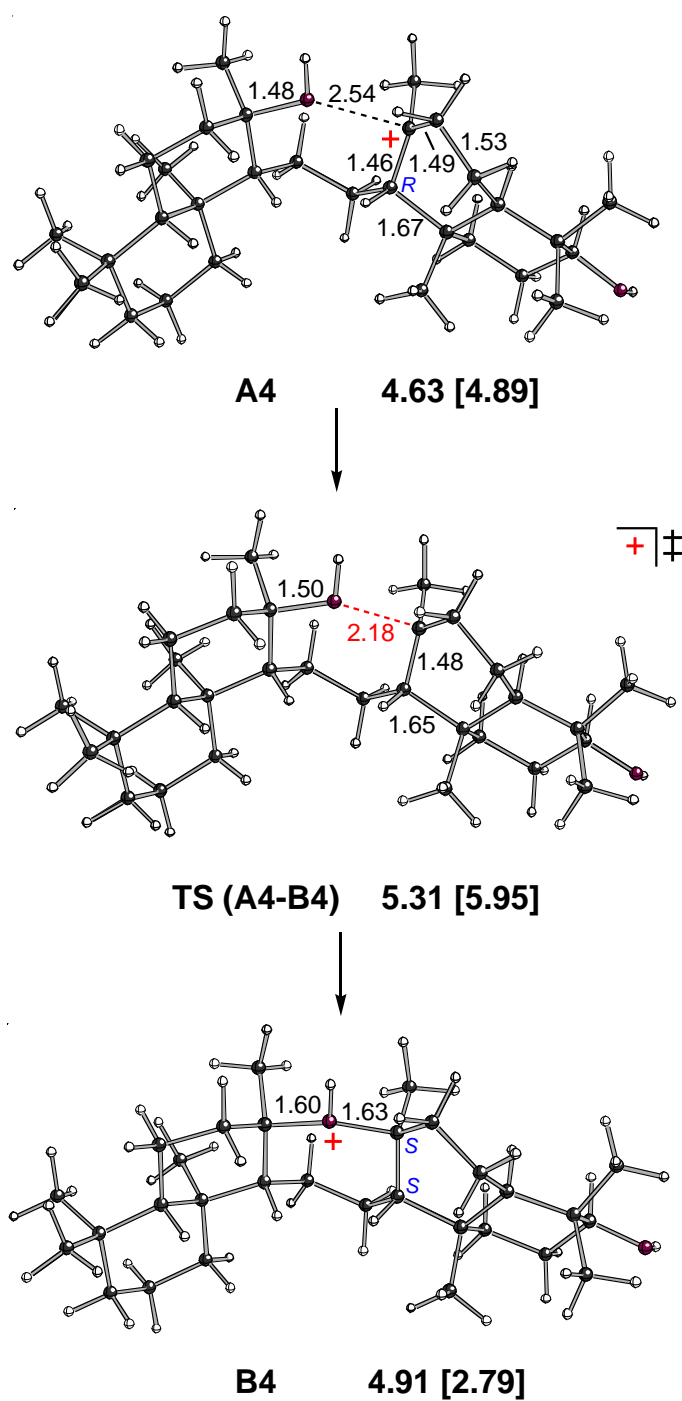

**Figure S5** | Formation of **B4**. Energies (kcal/mol; B3LYP/6-31G(d)//B3LYP/6-31G(d) in normal texts and mPW1PW91/6-31+G(d,p)//B3LYP/6-31G(d) in brackets) are shown.

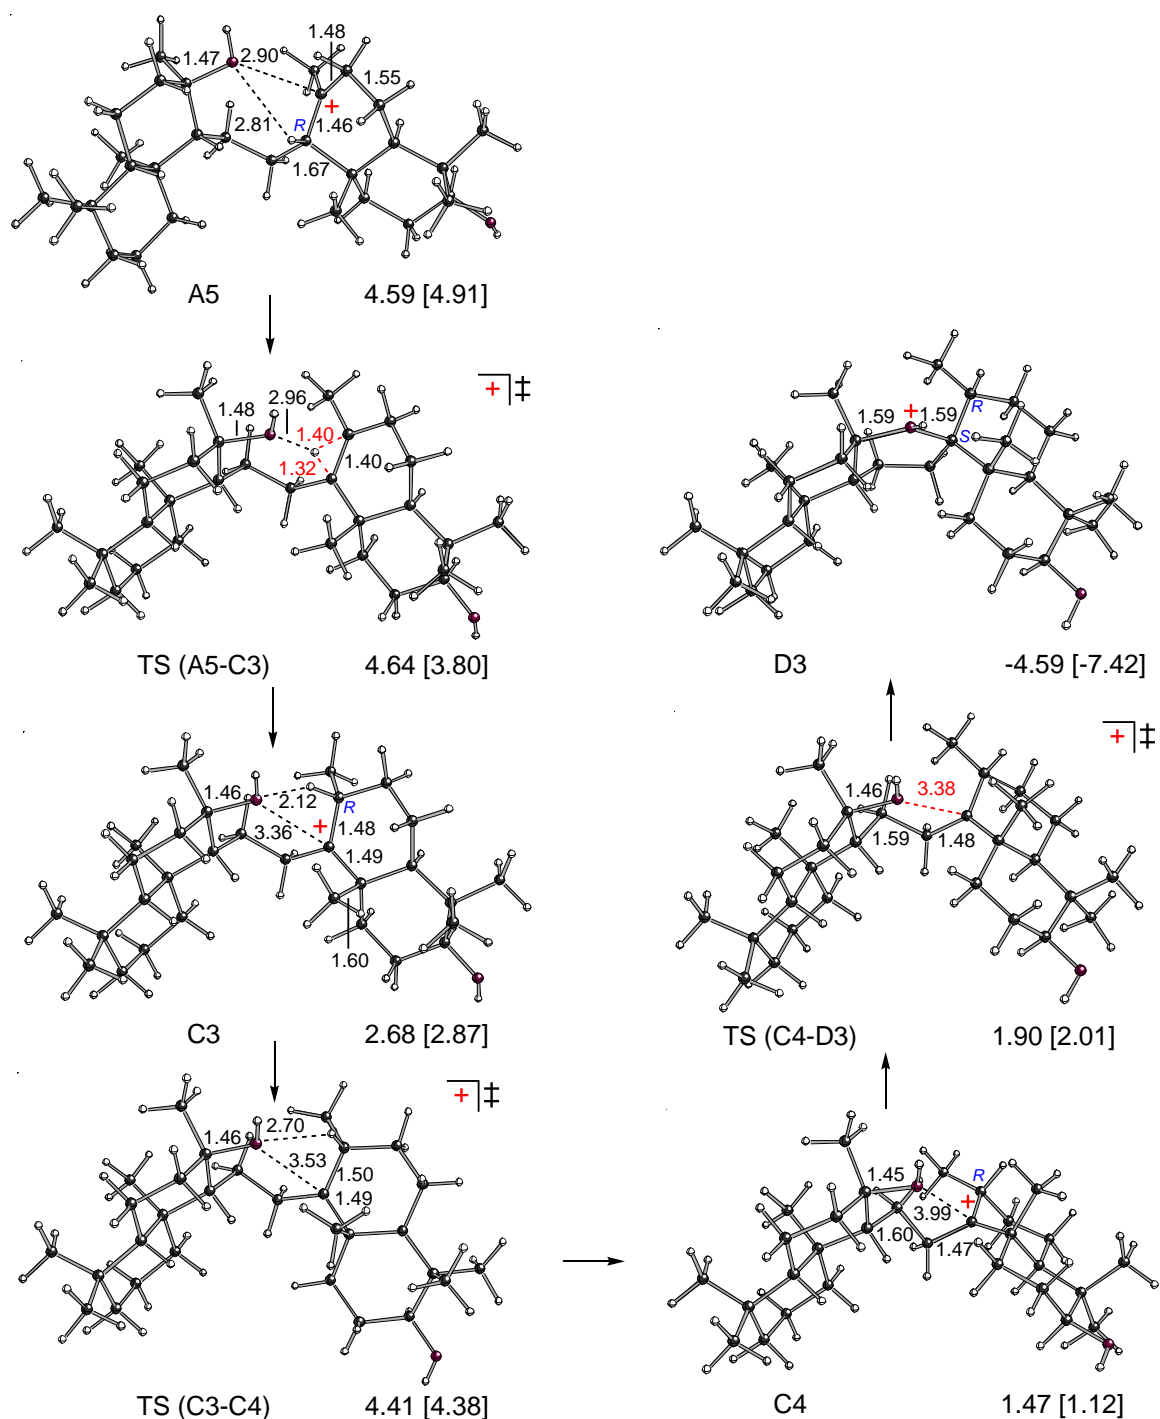

**Figure S6** | Formation of **D3** (**21+H<sup>+</sup>**). Energies (kcal/mol; B3LYP/6-31G(d)//B3LYP/6-31G(d) in normal texts and mPW1PW91/6-31+G(d,p)//B3LYP/6-31G(d) in brackets) are shown. Computed energy barrier for 1,2-hydride shift for **A5** is small. Overall the highest energy step is conformation change of **C** for cyclization.

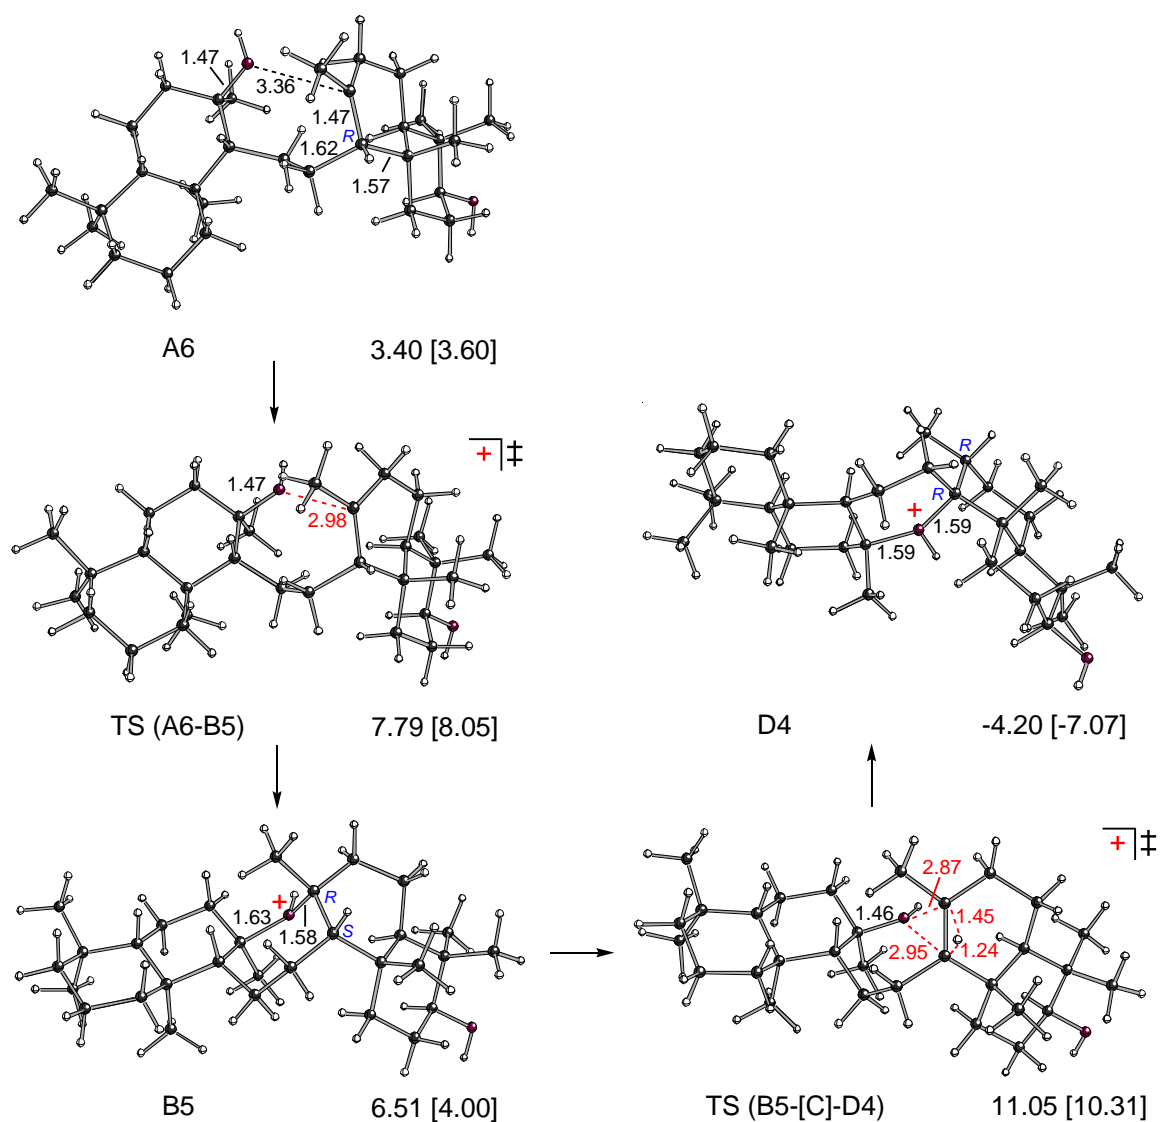

**Figure S7** | Formation of **B5** and **D4**. Energies (kcal/mol; B3LYP/6-31G(d)//B3LYP/6-31G(d) in normal texts and mPW1PW91/6-31+G(d,p)//B3LYP/6-31G(d) in brackets) are shown. The **B5**→**D4** conversion is a concerted reaction consisting of asynchronously occurring ring opening/1,2-hydride shift/ring closure events, which is formally known as a dyotropic rearrangement.

**Table S1** | Reaction energetics (kcal/mol; mPW1PW91/6-31+G(d,p)//B3LYP/6-31G(d)) for formation of **B** (6-6-7-6-6) and **D** (6-6-6-6-6). Isomers **B1** (10+H<sup>+</sup>) and **D3** (21+H<sup>+</sup>) are observed in experiments.

|           |                       |              |                   |                              |           |
|-----------|-----------------------|--------------|-------------------|------------------------------|-----------|
| <b>A1</b> | <b>TS (A1-B1)</b>     |              |                   | <b>B1 (10+H<sup>+</sup>)</b> |           |
| 0.00      | <b>0.49</b>           |              |                   | -7.19                        | Figure S1 |
| <b>A2</b> | <b>TS (A2-C1)</b>     | <b>C1</b>    | <b>TS (C1-D1)</b> | <b>D1</b>                    |           |
| 1.52      | 1.90                  | 3.05         | <b>6.96</b>       | -6.97                        | Figure S2 |
| <b>A3</b> | <b>TS (A3-B2)</b>     |              |                   | <b>B2</b>                    |           |
| 4.42      | <b>6.81</b>           |              |                   | -1.45                        | Figure S3 |
| <b>B3</b> | <b>TS (B3-C2)</b>     | <b>C2</b>    | <b>TS (C2-D2)</b> | <b>D2</b>                    |           |
| -1.86     | <b>10.10</b>          | 5.58         | 5.70              | -0.80                        | Figure S4 |
| <b>A4</b> | <b>TS (A4-B4)</b>     |              |                   | <b>B4</b>                    |           |
| 4.89      | <b>5.95</b>           |              |                   | 2.79                         | Figure S5 |
| <b>A5</b> | <b>TS (A5-C3)</b>     | <b>C3/C4</b> | <b>TS (C4-D3)</b> | <b>D3 (21+H<sup>+</sup>)</b> |           |
| 4.91      | <b>3.80</b>           | 2.87/1.12    | 2.01              | -7.42                        | Figure S6 |
| <b>A6</b> | <b>TS (A6-B5)</b>     |              |                   | <b>B5</b>                    |           |
| 3.60      | <b>8.05</b>           |              |                   | 4.00                         | Figure S7 |
| <b>B5</b> | <b>TS (B5-[C]-D4)</b> |              |                   | <b>D4</b>                    |           |
| 4.00      | <b>10.31</b>          |              |                   | -7.07                        | Figure S7 |

## Coordinates and Energies

### Figure S1

#### A1

B3LYP/6-31G(d)//B3LYP/6-31G(d)

HF = -1325.3001832 hartrees (-831639.117959832 kcal/mol)

Imaginary Frequencies: none found

Zero-point correction = 0.789404 (Hartree/Particle)

mPW1PW91/6-31+G(d,p)//B3LYP/6-31G(d)

HF = -1325.1311583 hartrees (-831533.053144833 kcal/mol)

Coordinates (from last standard orientation):

-----

| Center | Atomic | Coordinates (Angstroms) |           |           |
|--------|--------|-------------------------|-----------|-----------|
| Number | Number | X                       | Y         | Z         |
| -----  |        |                         |           |           |
| 1      | 6      | 3.088171                | -1.684607 | -0.658477 |
| 2      | 6      | 2.987497                | -0.417589 | 0.223235  |
| 3      | 6      | 4.209967                | 0.510871  | -0.084898 |
| 4      | 6      | 5.637672                | -0.144175 | 0.045263  |
| 5      | 6      | 5.622366                | -1.439063 | -0.815795 |
| 6      | 6      | 4.452808                | -2.375053 | -0.496686 |
| 7      | 1      | 4.579010                | -2.782824 | 0.512043  |
| 8      | 6      | 1.640025                | 0.425771  | -0.306173 |
| 9      | 6      | 1.680118                | 1.630995  | 0.520983  |
| 10     | 6      | 2.754465                | 2.595250  | 0.236524  |
| 11     | 1      | 2.651890                | 3.520982  | 0.807811  |
| 12     | 6      | 4.094035                | 1.859433  | 0.633193  |
| 13     | 6      | 0.314522                | -0.356383 | -0.340033 |
| 14     | 1      | 0.501286                | -1.318664 | -0.820666 |
| 15     | 1      | -0.021766               | -0.594267 | 0.673181  |
| 16     | 6      | -0.799506               | 0.412181  | -1.117879 |
| 17     | 1      | -0.992315               | -0.114472 | -2.057400 |
| 18     | 1      | -0.406616               | 1.391015  | -1.409327 |
| 19     | 6      | -2.129072               | 0.640784  | -0.341124 |
| 20     | 1      | -1.884742               | 0.568800  | 0.728660  |
| 21     | 6      | -2.632882               | 2.107056  | -0.488839 |
| 22     | 6      | -3.852311               | 2.328193  | 0.420801  |
| 23     | 1      | -3.498909               | 2.298749  | 1.460220  |
| 24     | 6      | -2.900297               | 2.595750  | -1.919539 |
| 25     | 1      | -3.056677               | 3.681834  | -1.906854 |

|    |   |           |           |           |
|----|---|-----------|-----------|-----------|
| 26 | 1 | -2.057633 | 2.391198  | -2.586281 |
| 27 | 1 | -3.796253 | 2.148421  | -2.352190 |
| 28 | 6 | -3.239466 | -0.459559 | -0.564538 |
| 29 | 6 | -4.395338 | -0.144912 | 0.456944  |
| 30 | 1 | -3.887369 | -0.114554 | 1.436264  |
| 31 | 6 | -4.952461 | 1.274248  | 0.239089  |
| 32 | 1 | -5.748625 | 1.484030  | 0.959329  |
| 33 | 1 | -5.411146 | 1.371946  | -0.751718 |
| 34 | 1 | -4.256544 | 3.336633  | 0.251813  |
| 35 | 6 | -2.629859 | -1.838125 | -0.189999 |
| 36 | 1 | -1.864963 | -2.122779 | -0.924976 |
| 37 | 1 | -2.117727 | -1.747863 | 0.780091  |
| 38 | 6 | -5.486269 | -1.256221 | 0.648207  |
| 39 | 6 | -4.764917 | -2.597172 | 0.938827  |
| 40 | 1 | -4.307391 | -2.534803 | 1.937881  |
| 41 | 6 | -3.672437 | -2.957988 | -0.071880 |
| 42 | 1 | -4.116002 | -3.175606 | -1.050747 |
| 43 | 1 | -3.172543 | -3.883676 | 0.239480  |
| 44 | 6 | -6.458592 | -1.412246 | -0.541315 |
| 45 | 1 | -7.259619 | -2.110279 | -0.271053 |
| 46 | 1 | -6.935962 | -0.460452 | -0.800477 |
| 47 | 1 | -5.982162 | -1.802586 | -1.443221 |
| 48 | 6 | -6.338359 | -0.923690 | 1.895339  |
| 49 | 1 | -7.005939 | -0.071319 | 1.731879  |
| 50 | 1 | -6.970910 | -1.780690 | 2.154231  |
| 51 | 1 | -5.710070 | -0.701672 | 2.767102  |
| 52 | 6 | -3.708842 | -0.513770 | -2.042705 |
| 53 | 1 | -4.037123 | -1.516857 | -2.321890 |

|    |   |           |           |           |
|----|---|-----------|-----------|-----------|
| 54 | 1 | -4.543118 | 0.157929  | -2.254000 |
| 55 | 1 | -2.900115 | -0.252230 | -2.732597 |
| 56 | 1 | 4.483324  | -3.236719 | -1.176750 |
| 57 | 8 | -1.523658 | 2.915624  | 0.025469  |
| 58 | 1 | -1.835503 | 3.834984  | 0.067875  |
| 59 | 1 | -5.508827 | -3.402284 | 0.993290  |
| 60 | 6 | 2.798693  | -0.816379 | 1.698333  |
| 61 | 1 | 1.794383  | -1.219796 | 1.863973  |
| 62 | 1 | 3.497199  | -1.603869 | 1.981387  |
| 63 | 1 | 2.947773  | 0.010706  | 2.398754  |
| 64 | 8 | 6.869807  | -2.091653 | -0.619968 |
| 65 | 1 | 6.945858  | -2.812520 | -1.263996 |
| 66 | 1 | 5.525173  | -1.121097 | -1.869743 |
| 67 | 1 | 2.950044  | -1.407148 | -1.712462 |
| 68 | 1 | 2.293148  | -2.393396 | -0.407374 |
| 69 | 1 | 4.135352  | 1.749944  | 1.720876  |
| 70 | 1 | 4.901862  | 2.537877  | 0.350157  |
| 71 | 6 | 0.805257  | 1.848496  | 1.664662  |
| 72 | 1 | -0.100712 | 2.334204  | 1.207345  |
| 73 | 1 | 1.215770  | 2.545704  | 2.399788  |
| 74 | 1 | 1.925581  | 0.688783  | -1.330796 |
| 75 | 1 | 4.124567  | 0.729406  | -1.161104 |
| 76 | 6 | 6.682400  | 0.809245  | -0.583637 |
| 77 | 1 | 7.619992  | 0.266798  | -0.727236 |
| 78 | 1 | 6.355552  | 1.182875  | -1.562398 |
| 79 | 1 | 6.895302  | 1.670390  | 0.058101  |
| 80 | 6 | 6.087133  | -0.439893 | 1.491472  |
| 81 | 1 | 6.044059  | 0.461881  | 2.111884  |

|    |   |          |           |           |
|----|---|----------|-----------|-----------|
| 82 | 1 | 5.499983 | -1.216430 | 1.985283  |
| 83 | 1 | 7.123615 | -0.784098 | 1.480191  |
| 84 | 1 | 2.807005 | 2.824250  | -0.833104 |
| 85 | 1 | 0.433253 | 0.933164  | 2.129325  |

# **TS (A1-B1)**

B3LYP/6-31G(d)//B3LYP/6-31G(d)

HF = -1325.2998616 hartrees (-831638.916152616 kcal/mol)

Imaginary Frequencies: 1 (-20.2839 1/cm)

Zero-point correction = 0.789355 (Hartree/Particle)

mPW1PW91/6-31+G(d,p)//B3LYP/6-31G(d)

HF = -1325.1303754 hartrees (-831532.561867254 kcal/mol)

Coordinates (from last standard orientation):

| Center<br>Number | Atomic<br>Number | Coordinates (Angstroms) |           |           |
|------------------|------------------|-------------------------|-----------|-----------|
|                  |                  | X                       | Y         | Z         |
| 1                | 6                | 3.206345                | -1.687810 | -0.759207 |
| 2                | 6                | 3.004444                | -0.505091 | 0.217195  |
| 3                | 6                | 4.152062                | 0.534892  | -0.008571 |
| 4                | 6                | 5.625295                | -0.018030 | 0.089457  |
| 5                | 6                | 5.715682                | -1.239239 | -0.868800 |
| 6                | 6                | 4.619643                | -2.282143 | -0.634529 |
| 7                | 1                | 4.771198                | -2.753717 | 0.342204  |
| 8                | 6                | 1.588874                | 0.274552  | -0.265070 |

|    |   |           |           |           |
|----|---|-----------|-----------|-----------|
| 9  | 6 | 1.549348  | 1.402357  | 0.657480  |
| 10 | 6 | 2.539811  | 2.469784  | 0.446249  |
| 11 | 1 | 2.362342  | 3.339498  | 1.083718  |
| 12 | 6 | 3.930542  | 1.814755  | 0.803770  |
| 13 | 6 | 0.337619  | -0.615151 | -0.392448 |
| 14 | 1 | 0.640104  | -1.536829 | -0.893781 |
| 15 | 1 | -0.035473 | -0.920733 | 0.589161  |
| 16 | 6 | -0.793958 | 0.062619  | -1.224234 |
| 17 | 1 | -1.072948 | -0.621672 | -2.030086 |
| 18 | 1 | -0.374548 | 0.941192  | -1.723503 |
| 19 | 6 | -2.064701 | 0.487610  | -0.429296 |
| 20 | 1 | -1.806126 | 0.437856  | 0.637740  |
| 21 | 6 | -2.412679 | 1.989615  | -0.641081 |
| 22 | 6 | -3.588070 | 2.383237  | 0.270185  |
| 23 | 1 | -3.224887 | 2.365733  | 1.306535  |
| 24 | 6 | -2.656757 | 2.437411  | -2.089123 |
| 25 | 1 | -2.689236 | 3.534027  | -2.128778 |
| 26 | 1 | -1.863266 | 2.106201  | -2.764993 |
| 27 | 1 | -3.609870 | 2.077801  | -2.479797 |
| 28 | 6 | -3.287457 | -0.500928 | -0.575633 |
| 29 | 6 | -4.387077 | -0.013899 | 0.438651  |
| 30 | 1 | -3.862065 | 0.013630  | 1.409437  |
| 31 | 6 | -4.795066 | 1.443054  | 0.151428  |
| 32 | 1 | -5.556036 | 1.772762  | 0.864685  |
| 33 | 1 | -5.253210 | 1.538276  | -0.839928 |
| 34 | 1 | -3.885803 | 3.419754  | 0.057389  |
| 35 | 6 | -2.816100 | -1.910647 | -0.125479 |
| 36 | 1 | -2.090446 | -2.315731 | -0.843261 |

|    |   |           |           |           |
|----|---|-----------|-----------|-----------|
| 37 | 1 | -2.287961 | -1.815243 | 0.836038  |
| 38 | 6 | -5.586233 | -0.992125 | 0.701457  |
| 39 | 6 | -5.004545 | -2.384556 | 1.058127  |
| 40 | 1 | -4.534002 | -2.319006 | 2.050917  |
| 41 | 6 | -3.965763 | -2.909786 | 0.063330  |
| 42 | 1 | -4.439662 | -3.137124 | -0.899036 |
| 43 | 1 | -3.558115 | -3.862225 | 0.424396  |
| 44 | 6 | -6.587194 | -1.107601 | -0.468667 |
| 45 | 1 | -7.456370 | -1.695144 | -0.150424 |
| 46 | 1 | -6.960065 | -0.125206 | -0.779717 |
| 47 | 1 | -6.170060 | -1.600323 | -1.349598 |
| 48 | 6 | -6.378751 | -0.503411 | 1.935907  |
| 49 | 1 | -6.957648 | 0.403208  | 1.731038  |
| 50 | 1 | -7.091792 | -1.274267 | 2.250416  |
| 51 | 1 | -5.716268 | -0.299370 | 2.786394  |
| 52 | 6 | -3.783200 | -0.585067 | -2.043502 |
| 53 | 1 | -4.229944 | -1.557130 | -2.260414 |
| 54 | 1 | -4.537451 | 0.166561  | -2.284651 |
| 55 | 1 | -2.961025 | -0.457527 | -2.755110 |
| 56 | 1 | 4.719139  | -3.085038 | -1.376903 |
| 57 | 8 | -1.214061 | 2.690618  | -0.172713 |
| 58 | 1 | -1.392944 | 3.642069  | -0.260946 |
| 59 | 1 | -5.827811 | -3.103563 | 1.157913  |
| 60 | 6 | 2.835529  | -1.034204 | 1.652632  |
| 61 | 1 | 1.861401  | -1.520112 | 1.769932  |
| 62 | 1 | 3.587165  | -1.790598 | 1.880113  |
| 63 | 1 | 2.918465  | -0.258723 | 2.419585  |
| 64 | 8 | 7.008234  | -1.808328 | -0.708070 |

|    |   |           |           |           |
|----|---|-----------|-----------|-----------|
| 65 | 1 | 7.143906  | -2.468780 | -1.404934 |
| 66 | 1 | 5.601492  | -0.849127 | -1.896348 |
| 67 | 1 | 3.052923  | -1.341785 | -1.790391 |
| 68 | 1 | 2.469256  | -2.474232 | -0.571469 |
| 69 | 1 | 3.975361  | 1.629898  | 1.881311  |
| 70 | 1 | 4.685477  | 2.571086  | 0.578749  |
| 71 | 6 | 0.699662  | 1.460633  | 1.844908  |
| 72 | 1 | -0.186125 | 2.021095  | 1.457714  |
| 73 | 1 | 1.133587  | 2.057901  | 2.652224  |
| 74 | 1 | 1.865096  | 0.636550  | -1.261182 |
| 75 | 1 | 4.056527  | 0.825907  | -1.066594 |
| 76 | 6 | 6.599188  | 1.058149  | -0.449028 |
| 77 | 1 | 7.575494  | 0.599803  | -0.624700 |
| 78 | 1 | 6.250622  | 1.484317  | -1.398378 |
| 79 | 1 | 6.744624  | 1.877828  | 0.262122  |
| 80 | 6 | 6.084754  | -0.390528 | 1.514383  |
| 81 | 1 | 5.972287  | 0.456172  | 2.200195  |
| 82 | 1 | 5.551299  | -1.242107 | 1.940737  |
| 83 | 1 | 7.143406  | -0.658198 | 1.489762  |
| 84 | 1 | 2.572853  | 2.779329  | -0.603053 |
| 85 | 1 | 0.336261  | 0.496019  | 2.200853  |

-----

# **B1 (10+H<sup>+</sup>)**

B3LYP/6-31G(d)//B3LYP/6-31G(d)

HF = -1325.3116578 hartrees (-831646.318386078 kcal/mol)

Imaginary Frequencies: none found

Zero-point correction = 0.792935 (Hartree/Particle)

mPW1PW91/6-31+G(d,p)//B3LYP/6-31G(d)

HF = -1325.1426158 hartrees (-831540.242840658 kcal/mol)

Coordinates (from last standard orientation):

| -----  |        |                         |           |           |
|--------|--------|-------------------------|-----------|-----------|
| Center | Atomic | Coordinates (Angstroms) |           |           |
| Number | Number | X                       | Y         | Z         |
| -----  |        |                         |           |           |
| 1      | 6      | 3.408735                | 1.856594  | 0.504080  |
| 2      | 6      | 2.944387                | 0.630085  | -0.333169 |
| 3      | 6      | 3.893928                | -0.569593 | 0.030325  |
| 4      | 6      | 5.443036                | -0.332396 | -0.072478 |
| 5      | 6      | 5.769502                | 0.937428  | 0.757656  |
| 6      | 6      | 4.910799                | 2.143478  | 0.376624  |
| 7      | 1      | 5.171860                | 2.463308  | -0.638202 |
| 8      | 6      | 1.473105                | 0.232399  | 0.155256  |
| 9      | 6      | 1.006946                | -1.119971 | -0.428217 |
| 10     | 6      | 2.017480                | -2.239143 | -0.160932 |
| 11     | 1      | 1.679169                | -3.169034 | -0.640064 |
| 12     | 6      | 3.425988                | -1.866948 | -0.646228 |
| 13     | 6      | 0.445852                | 1.376740  | 0.004961  |
| 14     | 1      | 0.939408                | 2.301110  | 0.311568  |
| 15     | 1      | 0.175296                | 1.527330  | -1.046606 |
| 16     | 6      | -0.844831               | 1.277320  | 0.843519  |
| 17     | 1      | -1.293050               | 2.272956  | 0.839744  |
| 18     | 1      | -0.582936               | 1.084687  | 1.890079  |
| 19     | 6      | -1.890373               | 0.261589  | 0.326521  |

|    |   |           |           |           |
|----|---|-----------|-----------|-----------|
| 20 | 1 | -1.740093 | 0.166279  | -0.754906 |
| 21 | 6 | -1.691301 | -1.152432 | 0.889192  |
| 22 | 6 | -2.582760 | -2.170539 | 0.189504  |
| 23 | 1 | -2.316656 | -2.219193 | -0.873171 |
| 24 | 6 | -1.662459 | -1.342965 | 2.401000  |
| 25 | 1 | -1.350318 | -2.363594 | 2.647231  |
| 26 | 1 | -0.984346 | -0.648416 | 2.898243  |
| 27 | 1 | -2.660851 | -1.202532 | 2.816126  |
| 28 | 6 | -3.411230 | 0.735634  | 0.435402  |
| 29 | 6 | -4.280307 | -0.354980 | -0.296473 |
| 30 | 1 | -3.848388 | -0.402402 | -1.310616 |
| 31 | 6 | -4.061286 | -1.753607 | 0.305561  |
| 32 | 1 | -4.655356 | -2.499848 | -0.228028 |
| 33 | 1 | -4.384976 | -1.798989 | 1.351415  |
| 34 | 1 | -2.433613 | -3.170813 | 0.619619  |
| 35 | 6 | -3.555282 | 2.057775  | -0.372391 |
| 36 | 1 | -3.035890 | 2.878027  | 0.135871  |
| 37 | 1 | -3.066762 | 1.935219  | -1.350750 |
| 38 | 6 | -5.785669 | 0.002637  | -0.564211 |
| 39 | 6 | -5.821292 | 1.368167  | -1.296048 |
| 40 | 1 | -5.423128 | 1.226773  | -2.312001 |
| 41 | 6 | -5.016174 | 2.470765  | -0.605368 |
| 42 | 1 | -5.490299 | 2.750932  | 0.343060  |
| 43 | 1 | -5.030037 | 3.378371  | -1.220559 |
| 44 | 6 | -6.671284 | 0.035393  | 0.699894  |
| 45 | 1 | -7.720196 | 0.157789  | 0.406758  |
| 46 | 1 | -6.604429 | -0.900740 | 1.266280  |
| 47 | 1 | -6.430053 | 0.855362  | 1.379209  |

|    |   |           |           |           |
|----|---|-----------|-----------|-----------|
| 48 | 6 | -6.394882 | -1.043562 | -1.526673 |
| 49 | 1 | -6.574480 | -2.009208 | -1.041998 |
| 50 | 1 | -7.363881 | -0.687835 | -1.894179 |
| 51 | 1 | -5.753852 | -1.212594 | -2.400953 |
| 52 | 6 | -3.808298 | 1.012667  | 1.907247  |
| 53 | 1 | -4.597152 | 1.763747  | 1.968865  |
| 54 | 1 | -4.180199 | 0.130958  | 2.435016  |
| 55 | 1 | -2.959822 | 1.409142  | 2.474874  |
| 56 | 1 | 5.162879  | 2.988088  | 1.032313  |
| 57 | 8 | -0.183581 | -1.598166 | 0.529642  |
| 58 | 1 | -0.183052 | -2.573876 | 0.513445  |
| 59 | 1 | -6.864884 | 1.684345  | -1.418135 |
| 60 | 6 | 2.954672  | 1.026865  | -1.830105 |
| 61 | 1 | 2.059595  | 1.598562  | -2.094107 |
| 62 | 1 | 3.806375  | 1.667621  | -2.061682 |
| 63 | 1 | 3.015921  | 0.173692  | -2.510427 |
| 64 | 8 | 7.155626  | 1.216963  | 0.593596  |
| 65 | 1 | 7.393413  | 1.939926  | 1.194352  |
| 66 | 1 | 5.561393  | 0.691248  | 1.815092  |
| 67 | 1 | 3.169936  | 1.678432  | 1.563055  |
| 68 | 1 | 2.860963  | 2.757030  | 0.207058  |
| 69 | 1 | 3.446869  | -1.785145 | -1.738197 |
| 70 | 1 | 4.088937  | -2.697546 | -0.391907 |
| 71 | 6 | 0.479788  | -1.161889 | -1.855310 |
| 72 | 1 | -0.004868 | -2.122566 | -2.057015 |
| 73 | 1 | 1.320372  | -1.075341 | -2.547295 |
| 74 | 1 | 1.585000  | 0.043336  | 1.232012  |
| 75 | 1 | 3.728201  | -0.724412 | 1.110179  |

|    |   |           |           |           |
|----|---|-----------|-----------|-----------|
| 76 | 6 | 6.181885  | -1.514219 | 0.602580  |
| 77 | 1 | 7.227083  | -1.238930 | 0.763998  |
| 78 | 1 | 5.743400  | -1.762006 | 1.577900  |
| 79 | 1 | 6.172666  | -2.418039 | -0.015311 |
| 80 | 6 | 5.984833  | -0.211436 | -1.513116 |
| 81 | 1 | 5.705809  | -1.085462 | -2.112343 |
| 82 | 1 | 5.636658  | 0.679857  | -2.038361 |
| 83 | 1 | 7.075924  | -0.162623 | -1.486783 |
| 84 | 1 | 2.068214  | -2.415606 | 0.920758  |
| 85 | 1 | -0.219189 | -0.358893 | -2.088065 |

Figure S2

## A2

B3LYP/6-31G(d)//B3LYP/6-31G(d)

HF = -1325.2962234 hartrees (-831636.633145734 kcal/mol)

Imaginary Frequencies: none found

Zero-point correction = 0.787463 (Hartree/Particle)

mPW1PW91/6-31+G(d,p)//B3LYP/6-31G(d)

HF = -1325.1287411 hartrees (-831531.536327661 kcal/mol)

Coordinates (from last standard orientation):

| Center | Atomic | Coordinates (Angstroms) |           |           |
|--------|--------|-------------------------|-----------|-----------|
| Number | Number | X                       | Y         | Z         |
| 1      | 6      | -2.758466               | -0.755368 | -1.438397 |

|    |   |           |           |           |
|----|---|-----------|-----------|-----------|
| 2  | 6 | -2.824475 | 0.618397  | -0.728126 |
| 3  | 6 | -3.631027 | 0.446104  | 0.607055  |
| 4  | 6 | -5.026988 | -0.275552 | 0.521992  |
| 5  | 6 | -4.836550 | -1.595689 | -0.273092 |
| 6  | 6 | -4.140508 | -1.393782 | -1.620788 |
| 7  | 1 | -4.779278 | -0.795273 | -2.279397 |
| 8  | 6 | -1.344116 | 1.082068  | -0.355442 |
| 9  | 6 | -1.264225 | 2.165050  | 0.592246  |
| 10 | 6 | -2.302998 | 2.351263  | 1.637932  |
| 11 | 1 | -2.332198 | 3.409893  | 1.928698  |
| 12 | 6 | -3.696831 | 1.774950  | 1.372721  |
| 13 | 6 | -0.286394 | 1.020375  | -1.493841 |
| 14 | 1 | -0.821122 | 1.024078  | -2.447779 |
| 15 | 1 | 0.326255  | 1.926240  | -1.509334 |
| 16 | 6 | 0.642103  | -0.217382 | -1.472973 |
| 17 | 1 | 1.190218  | -0.205994 | -2.418972 |
| 18 | 1 | 0.020144  | -1.113828 | -1.513014 |
| 19 | 6 | 1.641494  | -0.302070 | -0.279498 |
| 20 | 1 | 1.518252  | 0.613495  | 0.317441  |
| 21 | 6 | 1.271492  | -1.425714 | 0.734867  |
| 22 | 6 | 2.217325  | -1.375249 | 1.945123  |
| 23 | 1 | 1.990938  | -0.458473 | 2.505112  |
| 24 | 6 | 1.167145  | -2.850558 | 0.176477  |
| 25 | 1 | 0.730014  | -3.508377 | 0.939364  |
| 26 | 1 | 0.536838  | -2.910620 | -0.714571 |
| 27 | 1 | 2.145003  | -3.264823 | -0.072937 |
| 28 | 6 | 3.163426  | -0.272945 | -0.705921 |
| 29 | 6 | 4.014386  | -0.190596 | 0.615437  |

|    |   |           |           |           |
|----|---|-----------|-----------|-----------|
| 30 | 1 | 3.623301  | 0.704886  | 1.129615  |
| 31 | 6 | 3.700828  | -1.369072 | 1.555018  |
| 32 | 1 | 4.292751  | -1.292387 | 2.471465  |
| 33 | 1 | 3.979516  | -2.326274 | 1.098921  |
| 34 | 1 | 1.997909  | -2.216676 | 2.616519  |
| 35 | 6 | 3.411069  | 1.039686  | -1.501854 |
| 36 | 1 | 2.887304  | 1.013407  | -2.465288 |
| 37 | 1 | 2.981833  | 1.881811  | -0.934644 |
| 38 | 6 | 5.543637  | 0.124891  | 0.449430  |
| 39 | 6 | 5.681276  | 1.393914  | -0.430173 |
| 40 | 1 | 5.327193  | 2.258142  | 0.152364  |
| 41 | 6 | 4.896706  | 1.338686  | -1.743141 |
| 42 | 1 | 5.331540  | 0.590086  | -2.416037 |
| 43 | 1 | 4.988490  | 2.296968  | -2.269088 |
| 44 | 6 | 6.376325  | -1.035645 | -0.137114 |
| 45 | 1 | 7.442288  | -0.785706 | -0.082257 |
| 46 | 1 | 6.233716  | -1.962076 | 0.430554  |
| 47 | 1 | 6.149337  | -1.248187 | -1.183948 |
| 48 | 6 | 6.145336  | 0.466182  | 1.832782  |
| 49 | 1 | 6.247816  | -0.414963 | 2.474721  |
| 50 | 1 | 7.148786  | 0.889414  | 1.708938  |
| 51 | 1 | 5.537881  | 1.207777  | 2.366853  |
| 52 | 6 | 3.512861  | -1.482161 | -1.612303 |
| 53 | 1 | 4.332228  | -1.248354 | -2.294580 |
| 54 | 1 | 3.818569  | -2.365518 | -1.048099 |
| 55 | 1 | 2.662307  | -1.772763 | -2.237586 |
| 56 | 1 | -4.019169 | -2.366773 | -2.115235 |
| 57 | 8 | -0.067261 | -1.037264 | 1.204538  |

|    |   |           |           |           |
|----|---|-----------|-----------|-----------|
| 58 | 1 | -0.425695 | -1.764690 | 1.739329  |
| 59 | 1 | 6.743754  | 1.578542  | -0.633718 |
| 60 | 6 | -3.394961 | 1.691088  | -1.684907 |
| 61 | 1 | -3.545583 | 2.654959  | -1.186680 |
| 62 | 1 | -2.718413 | 1.862617  | -2.527959 |
| 63 | 1 | -4.352702 | 1.389599  | -2.108917 |
| 64 | 8 | -6.118881 | -2.190185 | -0.428755 |
| 65 | 1 | -6.004686 | -3.063677 | -0.833982 |
| 66 | 1 | -4.193170 | -2.252714 | 0.341771  |
| 67 | 1 | -2.139131 | -1.432780 | -0.835441 |
| 68 | 1 | -2.266980 | -0.662249 | -2.413189 |
| 69 | 1 | -4.286042 | 2.512916  | 0.820457  |
| 70 | 1 | -4.197615 | 1.645145  | 2.335170  |
| 71 | 6 | -0.102387 | 3.083855  | 0.682647  |
| 72 | 1 | -0.041917 | 3.582985  | 1.652616  |
| 73 | 1 | -0.264940 | 3.863317  | -0.082800 |
| 74 | 1 | -0.989185 | 0.298769  | 0.409526  |
| 75 | 1 | -3.013978 | -0.236817 | 1.214655  |
| 76 | 6 | -5.472439 | -0.665001 | 1.952881  |
| 77 | 1 | -6.314736 | -1.358278 | 1.890629  |
| 78 | 1 | -4.666458 | -1.163010 | 2.507359  |
| 79 | 1 | -5.802426 | 0.201214  | 2.535028  |
| 80 | 6 | -6.158808 | 0.574702  | -0.096546 |
| 81 | 1 | -6.279056 | 1.524065  | 0.435673  |
| 82 | 1 | -6.011703 | 0.799995  | -1.154887 |
| 83 | 1 | -7.101136 | 0.028775  | -0.015840 |
| 84 | 1 | -1.842287 | 1.855519  | 2.516742  |
| 85 | 1 | 0.849140  | 2.609694  | 0.435469  |

-----

### TS (A2-C1)

B3LYP/6-31G(d)//B3LYP/6-31G(d)

HF = -1325.2931782 hartrees (-831634.722252282 kcal/mol)

Imaginary Frequencies: 1 (-311.9691 1/cm)

Zero-point correction = 0.786609 (Hartree/Particle)

mPW1PW91/6-31+G(d,p)//B3LYP/6-31G(d)

HF = -1325.1281336 hartrees (-831531.155115336 kcal/mol)

Coordinates (from last standard orientation):

-----

| Center<br>Number | Atomic<br>Number | Coordinates (Angstroms) |           |           |
|------------------|------------------|-------------------------|-----------|-----------|
|                  |                  | X                       | Y         | Z         |
| -----            |                  |                         |           |           |
| 1                | 6                | 2.659911                | -0.829568 | 1.422540  |
| 2                | 6                | 2.808383                | 0.591293  | 0.818590  |
| 3                | 6                | 3.604450                | 0.468773  | -0.529885 |
| 4                | 6                | 4.954543                | -0.337265 | -0.502028 |
| 5                | 6                | 4.697321                | -1.696615 | 0.201685  |
| 6                | 6                | 4.005476                | -1.552456 | 1.558958  |
| 7                | 1                | 4.671534                | -1.040110 | 2.261302  |
| 8                | 6                | 1.429916                | 1.259708  | 0.570990  |
| 9                | 6                | 1.258945                | 2.142754  | -0.502655 |
| 10               | 6                | 2.347721                | 2.411484  | -1.529768 |
| 11               | 1                | 2.391815                | 3.498883  | -1.666790 |
| 12               | 6                | 3.728323                | 1.843106  | -1.200678 |

|    |   |           |           |           |
|----|---|-----------|-----------|-----------|
| 13 | 6 | 0.322966  | 1.055694  | 1.604031  |
| 14 | 1 | 0.823083  | 0.955699  | 2.571167  |
| 15 | 1 | -0.288120 | 1.958337  | 1.679021  |
| 16 | 6 | -0.612369 | -0.181659 | 1.447112  |
| 17 | 1 | -1.159207 | -0.235532 | 2.391321  |
| 18 | 1 | -0.002211 | -1.083816 | 1.417081  |
| 19 | 6 | -1.620444 | -0.160603 | 0.261103  |
| 20 | 1 | -1.600581 | 0.845352  | -0.175397 |
| 21 | 6 | -1.172824 | -1.070972 | -0.919867 |
| 22 | 6 | -2.126140 | -0.894395 | -2.109695 |
| 23 | 1 | -1.995122 | 0.123232  | -2.501146 |
| 24 | 6 | -0.948538 | -2.556780 | -0.613281 |
| 25 | 1 | -0.462282 | -3.033536 | -1.473705 |
| 26 | 1 | -0.308932 | -2.717170 | 0.258130  |
| 27 | 1 | -1.888052 | -3.084594 | -0.445683 |
| 28 | 6 | -3.133363 | -0.342757 | 0.693132  |
| 29 | 6 | -4.004217 | -0.124211 | -0.601487 |
| 30 | 1 | -3.702816 | 0.876302  | -0.957369 |
| 31 | 6 | -3.597687 | -1.094704 | -1.724762 |
| 32 | 1 | -4.208400 | -0.921312 | -2.614994 |
| 33 | 1 | -3.777682 | -2.136929 | -1.436081 |
| 34 | 1 | -1.840516 | -1.585530 | -2.915240 |
| 35 | 6 | -3.489559 | 0.797458  | 1.689694  |
| 36 | 1 | -2.962766 | 0.659935  | 2.642145  |
| 37 | 1 | -3.138182 | 1.754420  | 1.272022  |
| 38 | 6 | -5.553520 | 0.018882  | -0.393378 |
| 39 | 6 | -5.793779 | 1.113782  | 0.676653  |
| 40 | 1 | -5.522473 | 2.087652  | 0.241882  |

|    |   |           |           |           |
|----|---|-----------|-----------|-----------|
| 41 | 6 | -4.994535 | 0.919307  | 1.967268  |
| 42 | 1 | -5.354643 | 0.036889  | 2.509858  |
| 43 | 1 | -5.164919 | 1.769133  | 2.639382  |
| 44 | 6 | -6.271134 | -1.291624 | -0.002694 |
| 45 | 1 | -7.355627 | -1.132408 | -0.014905 |
| 46 | 1 | -6.057464 | -2.098045 | -0.713489 |
| 47 | 1 | -6.010335 | -1.650043 | 0.995222  |
| 48 | 6 | -6.199652 | 0.521298  | -1.705580 |
| 49 | 1 | -6.231436 | -0.251169 | -2.480988 |
| 50 | 1 | -7.234994 | 0.826866  | -1.516336 |
| 51 | 1 | -5.668208 | 1.391069  | -2.111861 |
| 52 | 6 | -3.354733 | -1.706710 | 1.395158  |
| 53 | 1 | -4.198570 | -1.669102 | 2.086095  |
| 54 | 1 | -3.557104 | -2.522916 | 0.698504  |
| 55 | 1 | -2.481312 | -1.994299 | 1.990595  |
| 56 | 1 | 3.826639  | -2.550059 | 1.981391  |
| 57 | 8 | 0.142013  | -0.518015 | -1.305355 |
| 58 | 1 | 0.450113  | -0.980646 | -2.102647 |
| 59 | 1 | -6.866277 | 1.168815  | 0.902347  |
| 60 | 6 | 3.464191  | 1.540830  | 1.865337  |
| 61 | 1 | 3.601773  | 2.555465  | 1.482520  |
| 62 | 1 | 2.853306  | 1.609897  | 2.770982  |
| 63 | 1 | 4.440536  | 1.164937  | 2.166749  |
| 64 | 8 | 5.948857  | -2.360232 | 0.320184  |
| 65 | 1 | 5.790716  | -3.258758 | 0.648618  |
| 66 | 1 | 4.025370  | -2.279148 | -0.456016 |
| 67 | 1 | 2.015569  | -1.424164 | 0.763263  |
| 68 | 1 | 2.169857  | -0.788887 | 2.401323  |

|    |   |           |           |           |
|----|---|-----------|-----------|-----------|
| 69 | 1 | 4.271129  | 2.538923  | -0.554164 |
| 70 | 1 | 4.305039  | 1.775036  | -2.126084 |
| 71 | 6 | 0.046417  | 3.027142  | -0.699862 |
| 72 | 1 | -0.217215 | 3.077414  | -1.760793 |
| 73 | 1 | 0.327602  | 4.041290  | -0.388938 |
| 74 | 1 | 0.894271  | 0.853724  | -0.634930 |
| 75 | 1 | 2.946878  | -0.139593 | -1.174072 |
| 76 | 6 | 5.366235  | -0.652543 | -1.961319 |
| 77 | 1 | 6.161363  | -1.402061 | -1.954847 |
| 78 | 1 | 4.526625  | -1.056227 | -2.542035 |
| 79 | 1 | 5.749443  | 0.228729  | -2.485031 |
| 80 | 6 | 6.138607  | 0.405734  | 0.157021  |
| 81 | 1 | 6.255316  | 1.412267  | -0.257536 |
| 82 | 1 | 6.053487  | 0.495164  | 1.242399  |
| 83 | 1 | 7.062234  | -0.143110 | -0.039037 |
| 84 | 1 | 1.984248  | 2.019782  | -2.490843 |
| 85 | 1 | -0.834926 | 2.733637  | -0.134998 |

-----

## C1

B3LYP/6-31G(d)//B3LYP/6-31G(d)

HF = -1325.2964621 hartrees (-831636.782932371 kcal/mol)

Imaginary Frequencies: none found

Zero-point correction = 0.789253 (Hartree/Particle)

mPW1PW91/6-31+G(d,p)//B3LYP/6-31G(d)

HF = -1325.1262987 hartrees (-831530.003697237 kcal/mol)

Coordinates (from last standard orientation):

| -----  |        |                         |           |           |
|--------|--------|-------------------------|-----------|-----------|
| Center | Atomic | Coordinates (Angstroms) |           |           |
| Number | Number | X                       | Y         | Z         |
| -----  |        |                         |           |           |
| 1      | 6      | -2.699340               | -0.599742 | -1.575606 |
| 2      | 6      | -2.733304               | 0.694268  | -0.721313 |
| 3      | 6      | -3.458241               | 0.433881  | 0.649090  |
| 4      | 6      | -4.801103               | -0.396628 | 0.609601  |
| 5      | 6      | -4.598945               | -1.638785 | -0.299569 |
| 6      | 6      | -4.068776               | -1.273425 | -1.686717 |
| 7      | 1      | -4.795742               | -0.646617 | -2.214481 |
| 8      | 6      | -1.381880               | 1.300818  | -0.516636 |
| 9      | 6      | -1.094293               | 2.020695  | 0.736587  |
| 10     | 6      | -2.312874               | 2.577384  | 1.510718  |
| 11     | 1      | -2.501717               | 3.583679  | 1.117141  |
| 12     | 6      | -3.603006               | 1.734121  | 1.458975  |
| 13     | 6      | -0.341487               | 1.219019  | -1.579880 |
| 14     | 1      | -0.847985               | 1.195253  | -2.549794 |
| 15     | 1      | 0.289323                | 2.109560  | -1.550887 |
| 16     | 6      | 0.602233                | -0.049160 | -1.577200 |
| 17     | 1      | 1.179503                | 0.071552  | -2.496753 |
| 18     | 1      | -0.022089               | -0.927428 | -1.726415 |
| 19     | 6      | 1.547406                | -0.240855 | -0.361325 |
| 20     | 1      | 1.424534                | 0.624661  | 0.300230  |
| 21     | 6      | 1.094305                | -1.432940 | 0.532202  |
| 22     | 6      | 1.975715                | -1.500745 | 1.788392  |
| 23     | 1      | 1.748466                | -0.622140 | 2.406704  |

|    |   |          |           |           |
|----|---|----------|-----------|-----------|
| 24 | 6 | 1.005824 | -2.811076 | -0.139960 |
| 25 | 1 | 0.495150 | -3.506947 | 0.537947  |
| 26 | 1 | 0.442132 | -2.792913 | -1.076925 |
| 27 | 1 | 1.989512 | -3.234711 | -0.346654 |
| 28 | 6 | 3.084875 | -0.225162 | -0.727445 |
| 29 | 6 | 3.870524 | -0.277005 | 0.637293  |
| 30 | 1 | 3.480774 | 0.588799  | 1.200637  |
| 31 | 6 | 3.476337 | -1.513129 | 1.466023  |
| 32 | 1 | 4.028827 | -1.525774 | 2.409683  |
| 33 | 1 | 3.746820 | -2.441075 | 0.948027  |
| 34 | 1 | 1.702084 | -2.384659 | 2.381409  |
| 35 | 6 | 3.409961 | 1.136897  | -1.402373 |
| 36 | 1 | 2.937159 | 1.200405  | -2.391182 |
| 37 | 1 | 2.977482 | 1.946905  | -0.793934 |
| 38 | 6 | 5.414322 | 0.000388  | 0.570090  |
| 39 | 6 | 5.630945 | 1.330130  | -0.195943 |
| 40 | 1 | 5.270006 | 2.156002  | 0.435615  |
| 41 | 6 | 4.914740 | 1.404089  | -1.547041 |
| 42 | 1 | 5.361788 | 0.696364  | -2.255510 |
| 43 | 1 | 5.060341 | 2.397249  | -1.989300 |
| 44 | 6 | 6.240673 | -1.136245 | -0.068593 |
| 45 | 1 | 7.309377 | -0.918290 | 0.041059  |
| 46 | 1 | 6.056535 | -2.096440 | 0.426538  |
| 47 | 1 | 6.046692 | -1.268084 | -1.135189 |
| 48 | 6 | 5.956020 | 0.213398  | 2.002868  |
| 49 | 1 | 6.001538 | -0.717187 | 2.577820  |
| 50 | 1 | 6.976136 | 0.611793  | 1.958775  |
| 51 | 1 | 5.345399 | 0.931632  | 2.564277  |

|    |   |           |           |           |
|----|---|-----------|-----------|-----------|
| 52 | 6 | 3.438080  | -1.368466 | -1.714200 |
| 53 | 1 | 4.292130  | -1.107556 | -2.341806 |
| 54 | 1 | 3.692050  | -2.305121 | -1.214134 |
| 55 | 1 | 2.608023  | -1.580535 | -2.397477 |
| 56 | 1 | -3.957842 | -2.185176 | -2.288221 |
| 57 | 8 | -0.261993 | -1.050792 | 0.928595  |
| 58 | 1 | -0.593233 | -1.743820 | 1.524139  |
| 59 | 1 | 6.707102  | 1.497858  | -0.330855 |
| 60 | 6 | -3.395554 | 1.872497  | -1.556282 |
| 61 | 1 | -3.331661 | 2.846308  | -1.064251 |
| 62 | 1 | -2.947489 | 1.952302  | -2.549423 |
| 63 | 1 | -4.452786 | 1.634810  | -1.674415 |
| 64 | 8 | -5.841870 | -2.323330 | -0.376866 |
| 65 | 1 | -5.699809 | -3.169427 | -0.828587 |
| 66 | 1 | -3.846186 | -2.284836 | 0.189197  |
| 67 | 1 | -2.012687 | -1.298255 | -1.085410 |
| 68 | 1 | -2.302483 | -0.397976 | -2.576141 |
| 69 | 1 | -4.408533 | 2.341039  | 1.037680  |
| 70 | 1 | -3.915588 | 1.483948  | 2.475205  |
| 71 | 6 | 0.040744  | 3.060755  | 0.736625  |
| 72 | 1 | 0.159131  | 3.453426  | 1.750453  |
| 73 | 1 | -0.208046 | 3.906015  | 0.085047  |
| 74 | 1 | -0.735188 | 1.105309  | 1.281052  |
| 75 | 1 | -2.752570 | -0.211710 | 1.191253  |
| 76 | 6 | -5.085559 | -0.915749 | 2.040151  |
| 77 | 1 | -5.898768 | -1.644694 | 2.004505  |
| 78 | 1 | -4.206732 | -1.412918 | 2.470613  |
| 79 | 1 | -5.387967 | -0.113032 | 2.719424  |

|    |   |           |           |           |
|----|---|-----------|-----------|-----------|
| 80 | 6 | -6.050099 | 0.392247  | 0.152360  |
| 81 | 1 | -6.222754 | 1.270165  | 0.781060  |
| 82 | 1 | -6.009865 | 0.724884  | -0.888748 |
| 83 | 1 | -6.927025 | -0.252413 | 0.238979  |
| 84 | 1 | -1.988580 | 2.724623  | 2.544974  |
| 85 | 1 | 1.006761  | 2.659339  | 0.427881  |

### TS (C1-D1)

B3LYP/6-31G(d)//B3LYP/6-31G(d)

HF = -1325.2910615 hartrees (-831633.394001865 kcal/mol)

Imaginary Frequencies: 1 (-86.5045 1/cm)

Zero-point correction = 0.791042 (Hartree/Particle)

mPW1PW91/6-31+G(d,p)//B3LYP/6-31G(d)

HF = -1325.1200739 hartrees (-831526.097572989 kcal/mol)

Coordinates (from last standard orientation):

| Center<br>Number | Atomic<br>Number | Coordinates (Angstroms) |           |           |
|------------------|------------------|-------------------------|-----------|-----------|
|                  |                  | X                       | Y         | Z         |
| 1                | 6                | 2.413072                | -1.030218 | 1.175921  |
| 2                | 6                | 2.665061                | 0.427898  | 0.703897  |
| 3                | 6                | 3.635767                | 0.466737  | -0.528104 |
| 4                | 6                | 4.892532                | -0.492040 | -0.510644 |
| 5                | 6                | 4.440028                | -1.894878 | -0.026408 |
| 6                | 6                | 3.702905                | -1.841429 | 1.313734  |

|    |   |           |           |           |
|----|---|-----------|-----------|-----------|
| 7  | 1 | 4.360793  | -1.439364 | 2.091237  |
| 8  | 6 | 1.364212  | 1.177223  | 0.366092  |
| 9  | 6 | 1.455336  | 2.201306  | -0.758531 |
| 10 | 6 | 2.832877  | 2.914675  | -0.730003 |
| 11 | 1 | 2.919585  | 3.515529  | 0.181408  |
| 12 | 6 | 4.009025  | 1.928396  | -0.881455 |
| 13 | 6 | 0.321663  | 1.355443  | 1.452656  |
| 14 | 1 | 0.860720  | 1.440847  | 2.401019  |
| 15 | 1 | -0.181898 | 2.310771  | 1.294305  |
| 16 | 6 | -0.787748 | 0.285249  | 1.661507  |
| 17 | 1 | -1.365043 | 0.648075  | 2.514754  |
| 18 | 1 | -0.343138 | -0.660752 | 1.978348  |
| 19 | 6 | -1.707668 | 0.102199  | 0.437393  |
| 20 | 1 | -1.755749 | 1.081874  | -0.056752 |
| 21 | 6 | -1.039105 | -0.817481 | -0.612193 |
| 22 | 6 | -1.833048 | -0.784179 | -1.923506 |
| 23 | 1 | -1.754106 | 0.223794  | -2.348788 |
| 24 | 6 | -0.733752 | -2.262879 | -0.204554 |
| 25 | 1 | -0.025333 | -2.704307 | -0.918356 |
| 26 | 1 | -0.311215 | -2.356789 | 0.797332  |
| 27 | 1 | -1.632850 | -2.877816 | -0.245530 |
| 28 | 6 | -3.218447 | -0.237918 | 0.736356  |
| 29 | 6 | -3.954140 | -0.168761 | -0.656888 |
| 30 | 1 | -3.729235 | 0.848161  | -1.021689 |
| 31 | 6 | -3.316638 | -1.120196 | -1.688153 |
| 32 | 1 | -3.832513 | -1.034864 | -2.648443 |
| 33 | 1 | -3.426300 | -2.167884 | -1.383196 |
| 34 | 1 | -1.390445 | -1.477396 | -2.651294 |

|    |   |           |           |           |
|----|---|-----------|-----------|-----------|
| 35 | 6 | -3.806936 | 0.889806  | 1.630551  |
| 36 | 1 | -3.387202 | 0.835324  | 2.642724  |
| 37 | 1 | -3.507514 | 1.865174  | 1.217346  |
| 38 | 6 | -5.522719 | -0.200644 | -0.626944 |
| 39 | 6 | -6.001309 | 0.902339  | 0.351019  |
| 40 | 1 | -5.791154 | 1.882005  | -0.103667 |
| 41 | 6 | -5.338894 | 0.852244  | 1.729497  |
| 42 | 1 | -5.663246 | -0.041813 | 2.275930  |
| 43 | 1 | -5.675694 | 1.704297  | 2.332271  |
| 44 | 6 | -6.127513 | -1.568879 | -0.245151 |
| 45 | 1 | -7.215268 | -1.537905 | -0.377027 |
| 46 | 1 | -5.749392 | -2.371824 | -0.888288 |
| 47 | 1 | -5.937626 | -1.854830 | 0.791624  |
| 48 | 6 | -6.068451 | 0.167889  | -2.026211 |
| 49 | 1 | -5.932390 | -0.636676 | -2.756546 |
| 50 | 1 | -7.145012 | 0.363160  | -1.964279 |
| 51 | 1 | -5.591395 | 1.073096  | -2.422335 |
| 52 | 6 | -3.356367 | -1.584339 | 1.490032  |
| 53 | 1 | -4.271944 | -1.617823 | 2.082664  |
| 54 | 1 | -3.382007 | -2.453428 | 0.829625  |
| 55 | 1 | -2.528380 | -1.726930 | 2.193775  |
| 56 | 1 | 3.441391  | -2.860321 | 1.628823  |
| 57 | 8 | 0.261617  | -0.124861 | -0.862254 |
| 58 | 1 | 0.853913  | -0.722680 | -1.350764 |
| 59 | 1 | -7.092133 | 0.842585  | 0.455681  |
| 60 | 6 | 3.263565  | 1.227842  | 1.924019  |
| 61 | 1 | 3.135999  | 2.309621  | 1.851168  |
| 62 | 1 | 2.812313  | 0.897758  | 2.862592  |

|    |   |           |           |           |
|----|---|-----------|-----------|-----------|
| 63 | 1 | 4.333388  | 1.035531  | 1.979512  |
| 64 | 8 | 5.591855  | -2.722949 | 0.036213  |
| 65 | 1 | 5.309958  | -3.630831 | 0.227014  |
| 66 | 1 | 3.735419  | -2.293267 | -0.781993 |
| 67 | 1 | 1.777712  | -1.537549 | 0.446571  |
| 68 | 1 | 1.862656  | -1.027843 | 2.122525  |
| 69 | 1 | 4.839332  | 2.266730  | -0.256985 |
| 70 | 1 | 4.373602  | 1.953151  | -1.912153 |
| 71 | 6 | 0.307240  | 3.208732  | -0.885681 |
| 72 | 1 | 0.445882  | 3.782739  | -1.806957 |
| 73 | 1 | 0.292185  | 3.926927  | -0.058410 |
| 74 | 1 | 1.469277  | 1.609338  | -1.680897 |
| 75 | 1 | 3.036959  | 0.081116  | -1.368919 |
| 76 | 6 | 5.401788  | -0.637502 | -1.965288 |
| 77 | 1 | 6.165294  | -1.417810 | -2.008499 |
| 78 | 1 | 4.592290  | -0.921007 | -2.650424 |
| 79 | 1 | 5.850149  | 0.289582  | -2.335589 |
| 80 | 6 | 6.092459  | -0.012852 | 0.340974  |
| 81 | 1 | 6.446158  | 0.971715  | 0.022904  |
| 82 | 1 | 5.888993  | 0.029644  | 1.414390  |
| 83 | 1 | 6.918418  | -0.714977 | 0.210135  |
| 84 | 1 | 2.830480  | 3.632402  | -1.556200 |
| 85 | 1 | -0.671241 | 2.725502  | -0.946973 |

-----

# D1

B3LYP/6-31G(d)//B3LYP/6-31G(d)

HF = -1325.3101807 hartrees (-831645.391491057 kcal/mol)

Imaginary Frequencies: none found

Zero-point correction = 0.793255 (Hartree/Particle)

mPW1PW91/6-31+G(d,p)//B3LYP/6-31G(d)

HF = -1325.1422616 hartrees (-831540.020576616 kcal/mol)

Coordinates (from last standard orientation):

| -----  |        |                         |           |           |  |
|--------|--------|-------------------------|-----------|-----------|--|
| Center | Atomic | Coordinates (Angstroms) |           |           |  |
| Number | Number | X                       | Y         | Z         |  |
| -----  |        |                         |           |           |  |
| 1      | 6      | -2.806774               | -0.547384 | -1.641904 |  |
| 2      | 6      | -2.698602               | 0.572846  | -0.565177 |  |
| 3      | 6      | -3.309722               | 0.039609  | 0.791482  |  |
| 4      | 6      | -4.736303               | -0.621568 | 0.718015  |  |
| 5      | 6      | -4.710180               | -1.691832 | -0.406045 |  |
| 6      | 6      | -4.214876               | -1.149125 | -1.748020 |  |
| 7      | 1      | -4.936268               | -0.420550 | -2.131338 |  |
| 8      | 6      | -1.189884               | 1.004921  | -0.316646 |  |
| 9      | 6      | -0.966456               | 1.945963  | 0.899845  |  |
| 10     | 6      | -1.689353               | 1.428637  | 2.159818  |  |
| 11     | 1      | -1.603099               | 2.184929  | 2.948171  |  |
| 12     | 6      | -3.160619               | 1.079255  | 1.917246  |  |
| 13     | 6      | -0.409338               | 1.409954  | -1.571195 |  |
| 14     | 1      | -0.652986               | 0.714546  | -2.375734 |  |
| 15     | 1      | -0.779887               | 2.381215  | -1.905751 |  |
| 16     | 6      | 1.129182                | 1.510140  | -1.412213 |  |
| 17     | 1      | 1.391279                | 2.509195  | -1.052780 |  |

|    |   |           |           |           |
|----|---|-----------|-----------|-----------|
| 18 | 1 | 1.558236  | 1.433521  | -2.416344 |
| 19 | 6 | 1.776525  | 0.481494  | -0.454006 |
| 20 | 1 | 1.707138  | 0.906203  | 0.554280  |
| 21 | 6 | 0.979841  | -0.824656 | -0.349050 |
| 22 | 6 | 1.491385  | -1.683542 | 0.806273  |
| 23 | 1 | 1.299514  | -1.155338 | 1.747079  |
| 24 | 6 | 0.736840  | -1.646890 | -1.608954 |
| 25 | 1 | -0.034105 | -2.405945 | -1.431254 |
| 26 | 1 | 0.451040  | -1.052782 | -2.477026 |
| 27 | 1 | 1.648733  | -2.188853 | -1.863761 |
| 28 | 6 | 3.327339  | 0.247725  | -0.647233 |
| 29 | 6 | 3.793534  | -0.609598 | 0.587456  |
| 30 | 1 | 3.470985  | -0.019732 | 1.462014  |
| 31 | 6 | 3.008555  | -1.933493 | 0.673830  |
| 32 | 1 | 3.319163  | -2.506463 | 1.551672  |
| 33 | 1 | 3.211753  | -2.575793 | -0.190627 |
| 34 | 1 | 0.948207  | -2.636798 | 0.845521  |
| 35 | 6 | 4.020491  | 1.635013  | -0.560051 |
| 36 | 1 | 3.773671  | 2.236473  | -1.443601 |
| 37 | 1 | 3.622496  | 2.176716  | 0.311360  |
| 38 | 6 | 5.342348  | -0.747850 | 0.796938  |
| 39 | 6 | 5.947373  | 0.680621  | 0.790359  |
| 40 | 1 | 5.625603  | 1.196137  | 1.707469  |
| 41 | 6 | 5.545610  | 1.535889  | -0.414763 |
| 42 | 1 | 5.992851  | 1.135431  | -1.332587 |
| 43 | 1 | 5.957468  | 2.545891  | -0.302708 |
| 44 | 6 | 6.054341  | -1.646035 | -0.237560 |
| 45 | 1 | 7.095657  | -1.798577 | 0.068193  |

|    |   |           |           |           |
|----|---|-----------|-----------|-----------|
| 46 | 1 | 5.592267  | -2.637945 | -0.302521 |
| 47 | 1 | 6.074508  | -1.220111 | -1.242957 |
| 48 | 6 | 5.613833  | -1.349534 | 2.195037  |
| 49 | 1 | 5.366078  | -2.415105 | 2.250450  |
| 50 | 1 | 6.678266  | -1.257729 | 2.438618  |
| 51 | 1 | 5.050968  | -0.826285 | 2.978084  |
| 52 | 6 | 3.650806  | -0.387007 | -2.023759 |
| 53 | 1 | 4.642432  | -0.092573 | -2.370869 |
| 54 | 1 | 3.640437  | -1.479133 | -2.011554 |
| 55 | 1 | 2.947547  | -0.058073 | -2.795853 |
| 56 | 1 | -4.190717 | -1.963838 | -2.484079 |
| 57 | 8 | -0.435948 | -0.329867 | 0.161055  |
| 58 | 1 | -1.063661 | -1.077151 | 0.151433  |
| 59 | 1 | 7.040365  | 0.606150  | 0.850040  |
| 60 | 6 | -3.452000 | 1.815833  | -1.122259 |
| 61 | 1 | -2.835588 | 2.392860  | -1.814867 |
| 62 | 1 | -4.330550 | 1.500574  | -1.683657 |
| 63 | 1 | -3.799667 | 2.492305  | -0.342783 |
| 64 | 8 | -6.019391 | -2.231062 | -0.522172 |
| 65 | 1 | -5.992350 | -2.979238 | -1.138414 |
| 66 | 1 | -4.007486 | -2.482985 | -0.079360 |
| 67 | 1 | -2.119207 | -1.377346 | -1.420535 |
| 68 | 1 | -2.505292 | -0.165299 | -2.623166 |
| 69 | 1 | -3.734881 | 1.983205  | 1.688156  |
| 70 | 1 | -3.582645 | 0.682944  | 2.844274  |
| 71 | 6 | -1.278904 | 3.435286  | 0.634853  |
| 72 | 1 | -0.899154 | 4.014876  | 1.482252  |
| 73 | 1 | -2.345669 | 3.647081  | 0.551326  |

|    |   |           |           |           |
|----|---|-----------|-----------|-----------|
| 74 | 1 | 0.106934  | 1.910908  | 1.106499  |
| 75 | 1 | -2.670631 | -0.810606 | 1.097892  |
| 76 | 6 | -5.007231 | -1.371500 | 2.045890  |
| 77 | 1 | -5.879260 | -2.018125 | 1.922277  |
| 78 | 1 | -4.157471 | -2.002913 | 2.336947  |
| 79 | 1 | -5.218491 | -0.686224 | 2.871985  |
| 80 | 6 | -5.897157 | 0.375032  | 0.509052  |
| 81 | 1 | -5.884980 | 1.153843  | 1.278419  |
| 82 | 1 | -5.886805 | 0.865568  | -0.465982 |
| 83 | 1 | -6.847323 | -0.157641 | 0.590176  |
| 84 | 1 | -1.170298 | 0.537147  | 2.534035  |
| 85 | 1 | -0.786058 | 3.819643  | -0.263136 |

Figure S3

### A3

B3LYP/6-31G(d)//B3LYP/6-31G(d) HF = -1325.2929549 hartrees (-831634.582129299 kcal/mol)

Imaginary Frequencies: none found

Zero-point correction = 0.789575 (Hartree/Particle)

mPW1PW91/6-31+G(d,p)//B3LYP/6-31G(d)

HF = -1325.124118 hartrees (-831528.63528618 kcal/mol)

Coordinates (from last standard orientation):

| Center | Atomic | Coordinates (Angstroms) |   |   |
|--------|--------|-------------------------|---|---|
| Number | Number | X                       | Y | Z |

|    |   |           |           |           |
|----|---|-----------|-----------|-----------|
| 1  | 6 | 2.922860  | -1.689957 | -0.440161 |
| 2  | 6 | 2.977334  | -0.346321 | 0.332521  |
| 3  | 6 | 4.291916  | 0.419871  | -0.055259 |
| 4  | 6 | 5.639395  | -0.381109 | 0.010131  |
| 5  | 6 | 5.431035  | -1.695542 | -0.793371 |
| 6  | 6 | 4.217213  | -2.505120 | -0.322358 |
| 7  | 1 | 4.387369  | -2.854686 | 0.701737  |
| 8  | 6 | 1.813259  | 0.552794  | -0.243050 |
| 9  | 6 | 2.023464  | 2.000088  | -0.076071 |
| 10 | 6 | 2.954556  | 2.426038  | 0.969487  |
| 11 | 1 | 2.610544  | 1.995733  | 1.919120  |
| 12 | 6 | 4.370703  | 1.789366  | 0.657158  |
| 13 | 6 | 0.350310  | 0.267603  | 0.331934  |
| 14 | 1 | 0.383431  | -0.749577 | 0.732993  |
| 15 | 1 | 0.140045  | 0.930694  | 1.176230  |
| 16 | 6 | -0.772821 | 0.372373  | -0.714722 |
| 17 | 1 | -0.746169 | -0.529478 | -1.334276 |
| 18 | 1 | -0.574369 | 1.198975  | -1.399549 |
| 19 | 6 | -2.165389 | 0.567125  | -0.050444 |
| 20 | 1 | -2.022700 | 0.398998  | 1.026283  |
| 21 | 6 | -2.619784 | 2.056506  | -0.118541 |
| 22 | 6 | -3.893280 | 2.231826  | 0.720772  |
| 23 | 1 | -3.626465 | 2.081356  | 1.775274  |
| 24 | 6 | -2.807205 | 2.667635  | -1.516002 |
| 25 | 1 | -2.913489 | 3.754847  | -1.416371 |
| 26 | 1 | -1.956600 | 2.479910  | -2.177762 |
| 27 | 1 | -3.705173 | 2.301334  | -2.015022 |
| 28 | 6 | -3.261255 | -0.486829 | -0.463025 |

|    |   |           |           |           |
|----|---|-----------|-----------|-----------|
| 29 | 6 | -4.506578 | -0.216216 | 0.461634  |
| 30 | 1 | -4.097923 | -0.295291 | 1.483568  |
| 31 | 6 | -4.998936 | 1.237771  | 0.334137  |
| 32 | 1 | -5.853462 | 1.405700  | 0.995505  |
| 33 | 1 | -5.359048 | 1.447019  | -0.680282 |
| 34 | 1 | -4.258702 | 3.264770  | 0.626433  |
| 35 | 6 | -2.723991 | -1.904483 | -0.115877 |
| 36 | 1 | -1.891819 | -2.173671 | -0.779899 |
| 37 | 1 | -2.317615 | -1.887178 | 0.907240  |
| 38 | 6 | -5.644862 | -1.296777 | 0.441516  |
| 39 | 6 | -4.995710 | -2.678833 | 0.708303  |
| 40 | 1 | -4.662186 | -2.706683 | 1.756511  |
| 41 | 6 | -3.798261 | -2.999175 | -0.190500 |
| 42 | 1 | -4.127705 | -3.140526 | -1.227290 |
| 43 | 1 | -3.355900 | -3.956274 | 0.112393  |
| 44 | 6 | -6.477266 | -1.327497 | -0.858461 |
| 45 | 1 | -7.329686 | -2.004907 | -0.730903 |
| 46 | 1 | -6.885455 | -0.339516 | -1.100004 |
| 47 | 1 | -5.915492 | -1.677545 | -1.727202 |
| 48 | 6 | -6.624940 | -1.026988 | 1.607037  |
| 49 | 1 | -7.255676 | -0.149564 | 1.430296  |
| 50 | 1 | -7.296779 | -1.883727 | 1.734285  |
| 51 | 1 | -6.094002 | -0.879926 | 2.555820  |
| 52 | 6 | -3.557312 | -0.427050 | -1.983417 |
| 53 | 1 | -3.900149 | -1.391181 | -2.363054 |
| 54 | 1 | -4.325177 | 0.303494  | -2.245981 |
| 55 | 1 | -2.655866 | -0.172690 | -2.552245 |
| 56 | 1 | 4.123725  | -3.408069 | -0.939821 |

|    |   |           |           |           |
|----|---|-----------|-----------|-----------|
| 57 | 8 | -1.522936 | 2.787013  | 0.527578  |
| 58 | 1 | -1.864255 | 3.671944  | 0.741607  |
| 59 | 1 | -5.759084 | -3.461455 | 0.610403  |
| 60 | 6 | 2.856831  | -0.629978 | 1.852713  |
| 61 | 1 | 1.816758  | -0.742763 | 2.169933  |
| 62 | 1 | 3.356093  | -1.566430 | 2.107050  |
| 63 | 1 | 3.311768  | 0.138704  | 2.483633  |
| 64 | 8 | 6.630856  | -2.451279 | -0.693796 |
| 65 | 1 | 6.567010  | -3.209121 | -1.295133 |
| 66 | 1 | 5.258437  | -1.405536 | -1.846125 |
| 67 | 1 | 2.750125  | -1.483349 | -1.506405 |
| 68 | 1 | 2.067677  | -2.286882 | -0.097830 |
| 69 | 1 | 4.889007  | 1.720564  | 1.615969  |
| 70 | 1 | 4.922390  | 2.503599  | 0.041979  |
| 71 | 1 | 1.732568  | 0.352679  | -1.319700 |
| 72 | 1 | 4.162813  | 0.639518  | -1.128988 |
| 73 | 6 | 6.735848  | 0.442951  | -0.705150 |
| 74 | 1 | 7.635763  | -0.165732 | -0.820442 |
| 75 | 1 | 6.414139  | 0.759967  | -1.705605 |
| 76 | 1 | 7.009311  | 1.338237  | -0.136083 |
| 77 | 6 | 6.145187  | -0.695211 | 1.435140  |
| 78 | 1 | 6.335244  | 0.219077  | 2.007661  |
| 79 | 1 | 5.461904  | -1.317210 | 2.016135  |
| 80 | 1 | 7.091929  | -1.235023 | 1.363821  |
| 81 | 1 | 3.016235  | 3.510431  | 1.077198  |
| 82 | 6 | 1.319571  | 2.985865  | -0.895804 |
| 83 | 1 | 0.303041  | 3.074566  | -0.427430 |
| 84 | 1 | 1.782973  | 3.974932  | -0.863965 |

85      1      1.145932   2.656731   -1.923574

-----

### TS (A3-B2)

B3LYP/6-31G(d)//B3LYP/6-31G(d)

HF = -1325.2898625 hartrees (-831632.641617375 kcal/mol)

Imaginary Frequencies: 1 (-47.7848 1/cm)

Zero-point correction = 0.789374 (Hartree/Particle)

mPW1PW91/6-31+G(d,p)//B3LYP/6-31G(d)

HF = -1325.1203105 hartrees (-831526.246041855 kcal/mol)

Coordinates (from last standard orientation):

-----

| Center | Atomic | Coordinates (Angstroms) |   |   |
|--------|--------|-------------------------|---|---|
| Number | Number | X                       | Y | Z |

-----

|    |   |          |           |           |
|----|---|----------|-----------|-----------|
| 1  | 6 | 3.374040 | -1.875824 | -0.655840 |
| 2  | 6 | 3.014158 | -0.603785 | 0.151243  |
| 3  | 6 | 4.182914 | 0.438125  | 0.021628  |
| 4  | 6 | 5.648570 | -0.068488 | 0.280324  |
| 5  | 6 | 5.848497 | -1.359762 | -0.562630 |
| 6  | 6 | 4.768884 | -2.419857 | -0.318198 |
| 7  | 1 | 4.828099 | -2.777691 | 0.715164  |
| 8  | 6 | 1.771186 | 0.073419  | -0.597303 |
| 9  | 6 | 1.775659 | 1.535900  | -0.496973 |
| 10 | 6 | 2.316973 | 2.137142  | 0.722507  |
| 11 | 1 | 1.809525 | 1.694025  | 1.585025  |

|    |   |           |           |           |
|----|---|-----------|-----------|-----------|
| 12 | 6 | 3.852925  | 1.739334  | 0.782211  |
| 13 | 6 | 0.360916  | -0.460668 | -0.092619 |
| 14 | 1 | 0.491080  | -1.544297 | -0.013117 |
| 15 | 1 | 0.200470  | -0.073359 | 0.913524  |
| 16 | 6 | -0.857720 | -0.145155 | -0.990261 |
| 17 | 1 | -1.064395 | -1.019250 | -1.612348 |
| 18 | 1 | -0.627211 | 0.657810  | -1.693548 |
| 19 | 6 | -2.104664 | 0.242769  | -0.144155 |
| 20 | 1 | -1.907531 | -0.119439 | 0.874319  |
| 21 | 6 | -2.197399 | 1.785971  | 0.035258  |
| 22 | 6 | -3.293592 | 2.104087  | 1.062968  |
| 23 | 1 | -2.957211 | 1.736201  | 2.041464  |
| 24 | 6 | -2.395762 | 2.629462  | -1.234647 |
| 25 | 1 | -2.210184 | 3.683440  | -0.991672 |
| 26 | 1 | -1.712268 | 2.349578  | -2.041067 |
| 27 | 1 | -3.412251 | 2.566552  | -1.624756 |
| 28 | 6 | -3.453101 | -0.468400 | -0.539752 |
| 29 | 6 | -4.495368 | -0.079111 | 0.576861  |
| 30 | 1 | -4.011173 | -0.408032 | 1.512276  |
| 31 | 6 | -4.638527 | 1.448630  | 0.711265  |
| 32 | 1 | -5.351784 | 1.691826  | 1.503820  |
| 33 | 1 | -5.047721 | 1.890061  | -0.205434 |
| 34 | 1 | -3.412112 | 3.193901  | 1.152892  |
| 35 | 6 | -3.235838 | -2.005425 | -0.452540 |
| 36 | 1 | -2.571619 | -2.345990 | -1.256886 |
| 37 | 1 | -2.726182 | -2.238052 | 0.495078  |
| 38 | 6 | -5.852968 | -0.865910 | 0.577663  |
| 39 | 6 | -5.526903 | -2.381331 | 0.574999  |

|    |   |           |           |           |
|----|---|-----------|-----------|-----------|
| 40 | 1 | -5.101638 | -2.644233 | 1.555172  |
| 41 | 6 | -4.540689 | -2.812309 | -0.513438 |
| 42 | 1 | -5.002415 | -2.717605 | -1.504117 |
| 43 | 1 | -4.306672 | -3.877790 | -0.397766 |
| 44 | 6 | -6.800795 | -0.509952 | -0.588064 |
| 45 | 1 | -7.770987 | -0.996382 | -0.433166 |
| 46 | 1 | -6.987270 | 0.568689  | -0.642275 |
| 47 | 1 | -6.430967 | -0.833611 | -1.563194 |
| 48 | 6 | -6.614051 | -0.571558 | 1.891428  |
| 49 | 1 | -7.036397 | 0.438511  | 1.914361  |
| 50 | 1 | -7.451394 | -1.270516 | 2.000203  |
| 51 | 1 | -5.967953 | -0.691336 | 2.770066  |
| 52 | 6 | -3.879269 | -0.112838 | -1.986191 |
| 53 | 1 | -4.498499 | -0.896897 | -2.425770 |
| 54 | 1 | -4.452729 | 0.814002  | -2.054437 |
| 55 | 1 | -3.003553 | -0.006811 | -2.636814 |
| 56 | 1 | 4.970315  | -3.291745 | -0.954324 |
| 57 | 8 | -0.891372 | 2.155051  | 0.593992  |
| 58 | 1 | -0.990657 | 3.052860  | 0.953085  |
| 59 | 1 | -6.460668 | -2.951181 | 0.484623  |
| 60 | 6 | 2.703452  | -0.999040 | 1.610834  |
| 61 | 1 | 1.818555  | -1.637197 | 1.672600  |
| 62 | 1 | 3.527773  | -1.573801 | 2.031855  |
| 63 | 1 | 2.542620  | -0.146176 | 2.276114  |
| 64 | 8 | 7.146509  | -1.860303 | -0.270458 |
| 65 | 1 | 7.340003  | -2.587446 | -0.881991 |
| 66 | 1 | 5.793624  | -1.062166 | -1.626094 |
| 67 | 1 | 3.357409  | -1.638137 | -1.729165 |

|    |   |          |           |           |
|----|---|----------|-----------|-----------|
| 68 | 1 | 2.613966 | -2.650743 | -0.496392 |
| 69 | 1 | 4.113605 | 1.664454  | 1.839953  |
| 70 | 1 | 4.420650 | 2.573671  | 0.363635  |
| 71 | 1 | 1.818329 | -0.189488 | -1.661941 |
| 72 | 1 | 4.184718 | 0.697026  | -1.052105 |
| 73 | 6 | 6.635057 | 0.998053  | -0.254606 |
| 74 | 1 | 7.645793 | 0.583391  | -0.268616 |
| 75 | 1 | 6.383800 | 1.305188  | -1.278145 |
| 76 | 1 | 6.651536 | 1.893311  | 0.376227  |
| 77 | 6 | 6.011000 | -0.327178 | 1.759762  |
| 78 | 1 | 5.862014 | 0.567094  | 2.374019  |
| 79 | 1 | 5.449495 | -1.144530 | 2.216083  |
| 80 | 1 | 7.068037 | -0.593973 | 1.822586  |
| 81 | 1 | 2.190099 | 3.220838  | 0.757521  |
| 82 | 6 | 1.464430 | 2.398003  | -1.651581 |
| 83 | 1 | 1.030027 | 1.867389  | -2.499090 |
| 84 | 1 | 0.840059 | 3.244078  | -1.349846 |
| 85 | 1 | 2.428664 | 2.830178  | -1.976785 |

## B2

B3LYP/6-31G(d)//B3LYP/6-31G(d)

HF = -1325.3020195 hartrees (-831640.270256445 kcal/mol)

Imaginary Frequencies: none found

Zero-point correction = 0.793403 (Hartree/Particle)

mPW1PW91/6-31+G(d,p)//B3LYP/6-31G(d)

HF = -1325.1334742 hartrees (-831534.506395242 kcal/mol)

Coordinates (from last standard orientation):

| -----  |        |                         |           |           |
|--------|--------|-------------------------|-----------|-----------|
| Center | Atomic | Coordinates (Angstroms) |           |           |
| Number | Number | X                       | Y         | Z         |
| -----  |        |                         |           |           |
| 1      | 6      | 3.480131                | 1.821521  | 0.714942  |
| 2      | 6      | 2.953457                | 0.699213  | -0.221929 |
| 3      | 6      | 3.929279                | -0.517103 | -0.128106 |
| 4      | 6      | 5.476930                | -0.246168 | -0.269767 |
| 5      | 6      | 5.836695                | 0.912304  | 0.698826  |
| 6      | 6      | 4.960951                | 2.152893  | 0.499022  |
| 7      | 1      | 5.141294                | 2.577651  | -0.494248 |
| 8      | 6      | 1.519596                | 0.250388  | 0.358965  |
| 9      | 6      | 1.231266                | -1.262424 | 0.133150  |
| 10     | 6      | 1.907584                | -1.809046 | -1.120124 |
| 11     | 1      | 1.537887                | -1.254321 | -1.986307 |
| 12     | 6      | 3.449451                | -1.695665 | -1.009814 |
| 13     | 6      | 0.414951                | 1.226756  | -0.111648 |
| 14     | 1      | 0.850205                | 2.225723  | -0.022161 |
| 15     | 1      | 0.211576                | 1.085550  | -1.179190 |
| 16     | 6      | -0.924545               | 1.261907  | 0.657752  |
| 17     | 1      | -1.309014               | 2.279559  | 0.562874  |
| 18     | 1      | -0.749674               | 1.118715  | 1.730811  |
| 19     | 6      | -1.999889               | 0.299278  | 0.115490  |
| 20     | 1      | -1.911324               | 0.329263  | -0.978942 |
| 21     | 6      | -1.715791               | -1.162014 | 0.485769  |
| 22     | 6      | -2.645111               | -2.123039 | -0.250121 |

|    |   |           |           |           |
|----|---|-----------|-----------|-----------|
| 23 | 1 | -2.460350 | -2.047028 | -1.329972 |
| 24 | 6 | -1.565437 | -1.522989 | 1.951997  |
| 25 | 1 | -1.192715 | -2.543450 | 2.068473  |
| 26 | 1 | -0.920417 | -0.838406 | 2.503312  |
| 27 | 1 | -2.551059 | -1.486142 | 2.418882  |
| 28 | 6 | -3.511130 | 0.716866  | 0.389355  |
| 29 | 6 | -4.403644 | -0.302106 | -0.414857 |
| 30 | 1 | -4.032739 | -0.220082 | -1.450683 |
| 31 | 6 | -4.119542 | -1.754529 | 0.006890  |
| 32 | 1 | -4.732741 | -2.450440 | -0.571146 |
| 33 | 1 | -4.375059 | -1.927354 | 1.058230  |
| 34 | 1 | -2.449122 | -3.159075 | 0.058786  |
| 35 | 6 | -3.737053 | 2.124866  | -0.231872 |
| 36 | 1 | -3.207670 | 2.888349  | 0.349362  |
| 37 | 1 | -3.304624 | 2.141428  | -1.243257 |
| 38 | 6 | -5.929157 | 0.041413  | -0.550417 |
| 39 | 6 | -6.039802 | 1.486159  | -1.099688 |
| 40 | 1 | -5.702010 | 1.484794  | -2.146575 |
| 41 | 6 | -5.219019 | 2.517704  | -0.323450 |
| 42 | 1 | -5.638426 | 2.661133  | 0.679723  |
| 43 | 1 | -5.293273 | 3.494514  | -0.816040 |
| 44 | 6 | -6.739017 | -0.113100 | 0.754778  |
| 45 | 1 | -7.805400 | 0.021166  | 0.540792  |
| 46 | 1 | -6.624766 | -1.113146 | 1.189153  |
| 47 | 1 | -6.470967 | 0.615910  | 1.522112  |
| 48 | 6 | -6.569838 | -0.893007 | -1.603549 |
| 49 | 1 | -6.690394 | -1.919411 | -1.240366 |
| 50 | 1 | -7.570298 | -0.528432 | -1.862005 |

|    |   |           |           |           |
|----|---|-----------|-----------|-----------|
| 51 | 1 | -5.982075 | -0.923770 | -2.529535 |
| 52 | 6 | -3.816074 | 0.797927  | 1.906562  |
| 53 | 1 | -4.630204 | 1.495637  | 2.108709  |
| 54 | 1 | -4.113158 | -0.156718 | 2.348111  |
| 55 | 1 | -2.948220 | 1.168218  | 2.462338  |
| 56 | 1 | 5.261308  | 2.925459  | 1.219867  |
| 57 | 8 | -0.301103 | -1.450963 | -0.249595 |
| 58 | 1 | -0.364605 | -2.352565 | -0.618089 |
| 59 | 1 | -7.095881 | 1.783029  | -1.119823 |
| 60 | 6 | 2.846715  | 1.255762  | -1.662582 |
| 61 | 1 | 2.212433  | 2.144855  | -1.706301 |
| 62 | 1 | 3.825598  | 1.555939  | -2.032737 |
| 63 | 1 | 2.449069  | 0.533428  | -2.380741 |
| 64 | 8 | 7.217012  | 1.208759  | 0.519447  |
| 65 | 1 | 7.476810  | 1.860958  | 1.188209  |
| 66 | 1 | 5.666621  | 0.542065  | 1.727004  |
| 67 | 1 | 3.355183  | 1.499100  | 1.758794  |
| 68 | 1 | 2.875476  | 2.729371  | 0.598810  |
| 69 | 1 | 3.842855  | -1.603322 | -2.025496 |
| 70 | 1 | 3.851311  | -2.632011 | -0.612423 |
| 71 | 1 | 1.594599  | 0.372366  | 1.446775  |
| 72 | 1 | 3.844477  | -0.842760 | 0.918987  |
| 73 | 6 | 6.231923  | -1.510524 | 0.208321  |
| 74 | 1 | 7.292645  | -1.277147 | 0.329080  |
| 75 | 1 | 5.854679  | -1.868069 | 1.175605  |
| 76 | 1 | 6.151520  | -2.331371 | -0.512356 |
| 77 | 6 | 5.989893  | 0.073721  | -1.692847 |
| 78 | 1 | 5.641353  | -0.660096 | -2.426579 |

|    |   |          |           |           |
|----|---|----------|-----------|-----------|
| 79 | 1 | 5.710059 | 1.066737  | -2.050752 |
| 80 | 1 | 7.081729 | 0.041810  | -1.691775 |
| 81 | 1 | 1.632652 | -2.863085 | -1.271315 |
| 82 | 6 | 1.489957 | -2.151983 | 1.346227  |
| 83 | 1 | 1.074316 | -1.740921 | 2.266195  |
| 84 | 1 | 1.093829 | -3.162279 | 1.192506  |
| 85 | 1 | 2.567038 | -2.253578 | 1.492847  |

Figure S4

**TS (B2-B3)**

B3LYP/6-31G(d)//B3LYP/6-31G(d)

HF = -1325.2907561 hartrees (-831633.202360311 kcal/mol)

Imaginary Frequencies: 1 (-129.4894 1/cm)

Zero-point correction = 0.793808 (Hartree/Particle)

mPW1PW91/6-31+G(d,p)//B3LYP/6-31G(d)

HF = -1325.1221209 hartrees (-831527.382085959 kcal/mol)

Coordinates (from last standard orientation):

| Center | Atomic | Coordinates (Angstroms) |           |           |
|--------|--------|-------------------------|-----------|-----------|
| Number | Number | X                       | Y         | Z         |
| 1      | 6      | 3.095294                | -1.803146 | -0.802485 |
| 2      | 6      | 2.664913                | -0.514738 | -0.048138 |
| 3      | 6      | 3.899434                | 0.448843  | 0.069618  |
| 4      | 6      | 5.294642                | -0.156807 | 0.494840  |

|    |   |           |           |           |
|----|---|-----------|-----------|-----------|
| 5  | 6 | 5.541133  | -1.436428 | -0.346210 |
| 6  | 6 | 4.382667  | -2.428787 | -0.262081 |
| 7  | 1 | 4.262890  | -2.774544 | 0.770788  |
| 8  | 6 | 1.612787  | 0.237532  | -0.951273 |
| 9  | 6 | 1.243782  | 1.670000  | -0.480523 |
| 10 | 6 | 2.186208  | 2.353700  | 0.561165  |
| 11 | 1 | 1.644835  | 2.503177  | 1.505094  |
| 12 | 6 | 3.527573  | 1.663827  | 0.927291  |
| 13 | 6 | 0.450882  | -0.711544 | -1.399023 |
| 14 | 1 | 0.841977  | -1.271797 | -2.253115 |
| 15 | 1 | 0.290995  | -1.459177 | -0.616352 |
| 16 | 6 | -0.952292 | -0.199246 | -1.790017 |
| 17 | 1 | -1.404720 | -0.998764 | -2.380449 |
| 18 | 1 | -0.905540 | 0.655841  | -2.470735 |
| 19 | 6 | -1.853867 | 0.083286  | -0.566041 |
| 20 | 1 | -1.471422 | -0.548109 | 0.246721  |
| 21 | 6 | -1.694523 | 1.510585  | -0.039475 |
| 22 | 6 | -2.351022 | 1.670550  | 1.329777  |
| 23 | 1 | -1.845994 | 1.015307  | 2.049691  |
| 24 | 6 | -2.011228 | 2.689947  | -0.948481 |
| 25 | 1 | -1.567987 | 3.609679  | -0.553937 |
| 26 | 1 | -1.687136 | 2.555435  | -1.978901 |
| 27 | 1 | -3.091408 | 2.843502  | -0.960921 |
| 28 | 6 | -3.376147 | -0.350965 | -0.692616 |
| 29 | 6 | -4.004266 | -0.170720 | 0.740644  |
| 30 | 1 | -3.361123 | -0.788426 | 1.389793  |
| 31 | 6 | -3.839846 | 1.269596  | 1.257799  |
| 32 | 1 | -4.248680 | 1.365421  | 2.266918  |

|    |   |           |           |           |
|----|---|-----------|-----------|-----------|
| 33 | 1 | -4.393262 | 1.984134  | 0.638345  |
| 34 | 1 | -2.254332 | 2.706166  | 1.685731  |
| 35 | 6 | -3.414941 | -1.869421 | -1.026495 |
| 36 | 1 | -3.062631 | -2.047098 | -2.049155 |
| 37 | 1 | -2.720870 | -2.399922 | -0.357660 |
| 38 | 6 | -5.433838 | -0.777684 | 0.966596  |
| 39 | 6 | -5.389811 | -2.263023 | 0.524778  |
| 40 | 1 | -4.777927 | -2.820258 | 1.249666  |
| 41 | 6 | -4.812403 | -2.487353 | -0.874439 |
| 42 | 1 | -5.491709 | -2.086040 | -1.636126 |
| 43 | 1 | -4.745300 | -3.562859 | -1.077099 |
| 44 | 6 | -6.572299 | -0.025286 | 0.244185  |
| 45 | 1 | -7.538519 | -0.426229 | 0.570830  |
| 46 | 1 | -6.572459 | 1.043953  | 0.486091  |
| 47 | 1 | -6.536714 | -0.121473 | -0.843048 |
| 48 | 6 | -5.760020 | -0.764609 | 2.478334  |
| 49 | 1 | -5.985278 | 0.239788  | 2.852853  |
| 50 | 1 | -6.645237 | -1.380727 | 2.671517  |
| 51 | 1 | -4.936621 | -1.176177 | 3.075426  |
| 52 | 6 | -4.089227 | 0.420505  | -1.830614 |
| 53 | 1 | -4.936149 | -0.144687 | -2.221712 |
| 54 | 1 | -4.481138 | 1.393108  | -1.523707 |
| 55 | 1 | -3.410062 | 0.584044  | -2.674713 |
| 56 | 1 | 4.623252  | -3.320241 | -0.857230 |
| 57 | 8 | -0.130766 | 1.596327  | 0.341321  |
| 58 | 1 | -0.072945 | 2.293973  | 1.019737  |
| 59 | 1 | -6.399852 | -2.686960 | 0.587335  |
| 60 | 6 | 2.049626  | -0.894418 | 1.317230  |

|    |   |          |           |           |
|----|---|----------|-----------|-----------|
| 61 | 1 | 1.706221 | -0.025141 | 1.886737  |
| 62 | 1 | 1.188411 | -1.558175 | 1.189832  |
| 63 | 1 | 2.763274 | -1.427906 | 1.946512  |
| 64 | 8 | 6.765616 | -2.014984 | 0.093202  |
| 65 | 1 | 6.982768 | -2.750303 | -0.500169 |
| 66 | 1 | 5.638409 | -1.119651 | -1.401081 |
| 67 | 1 | 3.256185 | -1.556770 | -1.863178 |
| 68 | 1 | 2.290236 | -2.545167 | -0.777342 |
| 69 | 1 | 3.481311 | 1.356266  | 1.974196  |
| 70 | 1 | 4.318220 | 2.415258  | 0.867377  |
| 71 | 6 | 1.064255 | 2.611559  | -1.669924 |
| 72 | 1 | 2.060859 | 2.780390  | -2.092168 |
| 73 | 1 | 0.672520 | 3.586777  | -1.368480 |
| 74 | 1 | 2.167066 | 0.456782  | -1.873899 |
| 75 | 1 | 4.072198 | 0.808804  | -0.957900 |
| 76 | 6 | 6.407331 | 0.855341  | 0.129266  |
| 77 | 1 | 7.384207 | 0.380579  | 0.249358  |
| 78 | 1 | 6.321693 | 1.187949  | -0.913159 |
| 79 | 1 | 6.389407 | 1.742265  | 0.771206  |
| 80 | 6 | 5.435601 | -0.474208 | 2.000814  |
| 81 | 1 | 5.318835 | 0.426508  | 2.611957  |
| 82 | 1 | 4.721279 | -1.218643 | 2.361537  |
| 83 | 1 | 6.435243 | -0.871557 | 2.189288  |
| 84 | 1 | 2.387945 | 3.362479  | 0.188771  |
| 85 | 1 | 0.443607 | 2.197165  | -2.464269 |

B3LYP/6-31G(d)//B3LYP/6-31G(d)

HF = -1325.3024083 hartrees (-831640.514232333 kcal/mol)

Imaginary Frequencies: none found

Zero-point correction = 0.794067 (Hartree/Particle)

mPW1PW91/6-31+G(d,p)//B3LYP/6-31G(d)

HF = -1325.134127 hartrees (-831534.91603377 kcal/mol)

Coordinates (from last standard orientation):

| -----  |        |                         |           |           |  |
|--------|--------|-------------------------|-----------|-----------|--|
| Center | Atomic | Coordinates (Angstroms) |           |           |  |
| Number | Number | X                       | Y         | Z         |  |
| -----  |        |                         |           |           |  |
| 1      | 6      | -3.001500               | -1.068621 | 1.738510  |  |
| 2      | 6      | -2.383536               | -0.257565 | 0.563335  |  |
| 3      | 6      | -3.578801               | 0.298264  | -0.292730 |  |
| 4      | 6      | -4.689842               | -0.711310 | -0.764356 |  |
| 5      | 6      | -5.159229               | -1.510590 | 0.480093  |  |
| 6      | 6      | -4.007513               | -2.129218 | 1.274777  |  |
| 7      | 1      | -3.523303               | -2.905792 | 0.671923  |  |
| 8      | 6      | -1.615039               | 0.986743  | 1.193543  |  |
| 9      | 6      | -1.300371               | 2.159580  | 0.241158  |  |
| 10     | 6      | -2.404589               | 2.442525  | -0.789044 |  |
| 11     | 1      | -2.020050               | 3.142501  | -1.548780 |  |
| 12     | 6      | -3.054054               | 1.209560  | -1.411954 |  |
| 13     | 6      | -0.458675               | 0.589720  | 2.183344  |  |
| 14     | 1      | -0.720362               | 0.973159  | 3.175741  |  |
| 15     | 1      | -0.481214               | -0.497138 | 2.290342  |  |

|    |   |          |           |           |
|----|---|----------|-----------|-----------|
| 16 | 6 | 1.024298 | 0.974041  | 1.953329  |
| 17 | 1 | 1.564772 | 0.494052  | 2.772519  |
| 18 | 1 | 1.183776 | 2.042034  | 2.120342  |
| 19 | 6 | 1.648533 | 0.531027  | 0.610590  |
| 20 | 1 | 1.071840 | -0.325608 | 0.249441  |
| 21 | 6 | 1.496039 | 1.590561  | -0.491777 |
| 22 | 6 | 1.919059 | 1.050082  | -1.855877 |
| 23 | 1 | 1.252997 | 0.226664  | -2.138618 |
| 24 | 6 | 2.028267 | 2.999403  | -0.261766 |
| 25 | 1 | 1.587001 | 3.698255  | -0.980688 |
| 26 | 1 | 1.859209 | 3.381239  | 0.743533  |
| 27 | 1 | 3.104806 | 3.004987  | -0.441111 |
| 28 | 6 | 3.137628 | -0.026724 | 0.705616  |
| 29 | 6 | 3.504827 | -0.572579 | -0.724856 |
| 30 | 1 | 2.708143 | -1.304082 | -0.942015 |
| 31 | 6 | 3.363375 | 0.516300  | -1.801681 |
| 32 | 1 | 3.595663 | 0.111326  | -2.789846 |
| 33 | 1 | 4.068571 | 1.339260  | -1.639736 |
| 34 | 1 | 1.830801 | 1.833373  | -2.622077 |
| 35 | 6 | 3.126584 | -1.243225 | 1.674686  |
| 36 | 1 | 2.955135 | -0.914216 | 2.705793  |
| 37 | 1 | 2.284265 | -1.899813 | 1.409997  |
| 38 | 6 | 4.818066 | -1.424797 | -0.842767 |
| 39 | 6 | 4.744987 | -2.553150 | 0.216706  |
| 40 | 1 | 3.968946 | -3.268328 | -0.093977 |
| 41 | 6 | 4.422070 | -2.067074 | 1.631058  |
| 42 | 1 | 5.258666 | -1.483656 | 2.034248  |
| 43 | 1 | 4.313399 | -2.928096 | 2.301199  |

|    |   |           |           |           |
|----|---|-----------|-----------|-----------|
| 44 | 6 | 6.124574  | -0.615693 | -0.691838 |
| 45 | 1 | 6.980271  | -1.259480 | -0.925095 |
| 46 | 1 | 6.163142  | 0.230455  | -1.387757 |
| 47 | 1 | 6.282680  | -0.225473 | 0.315694  |
| 48 | 6 | 4.858439  | -2.108121 | -2.229927 |
| 49 | 1 | 5.083658  | -1.405930 | -3.039748 |
| 50 | 1 | 5.644704  | -2.871102 | -2.243781 |
| 51 | 1 | 3.910642  | -2.608957 | -2.463895 |
| 52 | 6 | 4.100734  | 1.048311  | 1.265598  |
| 53 | 1 | 4.971074  | 0.594761  | 1.741416  |
| 54 | 1 | 4.484242  | 1.730436  | 0.503199  |
| 55 | 1 | 3.608740  | 1.651899  | 2.035989  |
| 56 | 1 | -4.415033 | -2.641561 | 2.156896  |
| 57 | 8 | -0.095482 | 1.728653  | -0.693621 |
| 58 | 1 | -0.220623 | 2.188961  | -1.545292 |
| 59 | 1 | 5.690909  | -3.109137 | 0.216333  |
| 60 | 6 | -1.434584 | -1.178061 | -0.229863 |
| 61 | 1 | -0.985596 | -0.687801 | -1.097025 |
| 62 | 1 | -0.622236 | -1.539085 | 0.409133  |
| 63 | 1 | -1.953548 | -2.063141 | -0.593588 |
| 64 | 8 | -6.074969 | -2.504464 | 0.031840  |
| 65 | 1 | -6.468022 | -2.928295 | 0.810347  |
| 66 | 1 | -5.680445 | -0.796299 | 1.143563  |
| 67 | 1 | -3.515667 | -0.372883 | 2.418517  |
| 68 | 1 | -2.219337 | -1.554662 | 2.331917  |
| 69 | 1 | -2.350628 | 0.676170  | -2.061581 |
| 70 | 1 | -3.869311 | 1.547410  | -2.056961 |
| 71 | 6 | -0.950775 | 3.461113  | 0.960728  |

|    |   |           |           |           |
|----|---|-----------|-----------|-----------|
| 72 | 1 | -1.851089 | 3.802690  | 1.480929  |
| 73 | 1 | -0.669587 | 4.245140  | 0.250950  |
| 74 | 1 | -2.381951 | 1.456482  | 1.826786  |
| 75 | 1 | -4.119848 | 0.962570  | 0.402934  |
| 76 | 6 | -5.911125 | 0.096432  | -1.269797 |
| 77 | 1 | -6.769166 | -0.573798 | -1.364886 |
| 78 | 1 | -6.184509 | 0.898678  | -0.572528 |
| 79 | 1 | -5.735299 | 0.544580  | -2.253303 |
| 80 | 6 | -4.271133 | -1.662521 | -1.908373 |
| 81 | 1 | -3.809001 | -1.108443 | -2.733127 |
| 82 | 1 | -3.578024 | -2.447185 | -1.598496 |
| 83 | 1 | -5.156824 | -2.166333 | -2.302176 |
| 84 | 1 | -3.176387 | 3.011305  | -0.256277 |
| 85 | 1 | -0.167669 | 3.357903  | 1.708152  |

-----

### TS (B3-C2)

B3LYP/6-31G(d)//B3LYP/6-31G(d)

HF = -1325.2805712 hartrees (-831626.811233712 kcal/mol)

Imaginary Frequencies: 1 (-454.5552 1/cm)

Zero-point correction = 0.787672 (Hartree/Particle)

mPW1PW91/6-31+G(d,p)//B3LYP/6-31G(d)

HF = -1325.1150602 hartrees (-831522.951426102 kcal/mol)

Coordinates (from last standard orientation):

-----

| Center | Atomic | Coordinates (Angstroms) |
|--------|--------|-------------------------|
|--------|--------|-------------------------|

| Number | Number | X         | Y         | Z         |
|--------|--------|-----------|-----------|-----------|
| -----  |        |           |           |           |
| 1      | 6      | 2.607434  | -1.278025 | -1.475053 |
| 2      | 6      | 2.337990  | -0.205168 | -0.381441 |
| 3      | 6      | 3.730035  | 0.272498  | 0.166881  |
| 4      | 6      | 4.742977  | -0.829324 | 0.647701  |
| 5      | 6      | 4.860675  | -1.890051 | -0.478907 |
| 6      | 6      | 3.504781  | -2.410707 | -0.962011 |
| 7      | 1      | 3.014466  | -2.966685 | -0.155465 |
| 8      | 6      | 1.584685  | 1.006287  | -1.009776 |
| 9      | 6      | 1.947066  | 2.333509  | -0.660793 |
| 10     | 6      | 2.966500  | 2.637740  | 0.412938  |
| 11     | 1      | 2.451542  | 3.331766  | 1.091506  |
| 12     | 6      | 3.521764  | 1.424728  | 1.158320  |
| 13     | 6      | 0.388589  | 0.747994  | -1.942244 |
| 14     | 1      | 0.664978  | 1.090579  | -2.948485 |
| 15     | 1      | 0.269090  | -0.331035 | -2.036850 |
| 16     | 6      | -0.993600 | 1.367889  | -1.595735 |
| 17     | 1      | -1.600962 | 1.183348  | -2.486790 |
| 18     | 1      | -0.909755 | 2.451191  | -1.533824 |
| 19     | 6      | -1.721559 | 0.815227  | -0.336919 |
| 20     | 1      | -1.059357 | 0.078226  | 0.126604  |
| 21     | 6      | -1.873286 | 1.896428  | 0.773651  |
| 22     | 6      | -2.477867 | 1.257641  | 2.034879  |
| 23     | 1      | -1.727793 | 0.575634  | 2.457267  |
| 24     | 6      | -2.636751 | 3.174730  | 0.394261  |
| 25     | 1      | -2.503690 | 3.920535  | 1.188041  |
| 26     | 1      | -2.276507 | 3.619731  | -0.538101 |

|    |   |           |           |           |
|----|---|-----------|-----------|-----------|
| 27 | 1 | -3.709521 | 3.004531  | 0.291457  |
| 28 | 6 | -3.038315 | 0.001736  | -0.658504 |
| 29 | 6 | -3.528183 | -0.619947 | 0.702487  |
| 30 | 1 | -2.656154 | -1.192677 | 1.063219  |
| 31 | 6 | -3.766927 | 0.471868  | 1.760831  |
| 32 | 1 | -4.099269 | 0.022645  | 2.701057  |
| 33 | 1 | -4.569986 | 1.152892  | 1.454878  |
| 34 | 1 | -2.657803 | 2.037951  | 2.788534  |
| 35 | 6 | -2.657151 | -1.175211 | -1.599907 |
| 36 | 1 | -2.369038 | -0.798151 | -2.590010 |
| 37 | 1 | -1.772089 | -1.683960 | -1.185915 |
| 38 | 6 | -4.661095 | -1.702458 | 0.613340  |
| 39 | 6 | -4.217742 | -2.779117 | -0.410352 |
| 40 | 1 | -3.379865 | -3.344484 | 0.025008  |
| 41 | 6 | -3.772434 | -2.217249 | -1.763078 |
| 42 | 1 | -4.626665 | -1.782161 | -2.295861 |
| 43 | 1 | -3.410235 | -3.032818 | -2.401169 |
| 44 | 6 | -6.053444 | -1.145730 | 0.245340  |
| 45 | 1 | -6.802237 | -1.940876 | 0.339665  |
| 46 | 1 | -6.357465 | -0.336896 | 0.919347  |
| 47 | 1 | -6.113239 | -0.767223 | -0.777260 |
| 48 | 6 | -4.798026 | -2.410698 | 1.981300  |
| 49 | 1 | -5.267776 | -1.774383 | 2.738367  |
| 50 | 1 | -5.427889 | -3.301678 | 1.877091  |
| 51 | 1 | -3.824438 | -2.737855 | 2.367429  |
| 52 | 6 | -4.095304 | 0.887858  | -1.367568 |
| 53 | 1 | -4.746312 | 0.297422  | -2.014942 |
| 54 | 1 | -4.746243 | 1.418276  | -0.670001 |

|    |   |           |           |           |
|----|---|-----------|-----------|-----------|
| 55 | 1 | -3.623766 | 1.641464  | -2.007230 |
| 56 | 1 | 3.662639  | -3.129436 | -1.776627 |
| 57 | 8 | -0.492954 | 2.286932  | 1.070389  |
| 58 | 1 | -0.531086 | 2.827773  | 1.877076  |
| 59 | 1 | -5.032414 | -3.500833 | -0.551920 |
| 60 | 6 | 1.390571  | -0.774266 | 0.706439  |
| 61 | 1 | 1.007419  | 0.005150  | 1.369136  |
| 62 | 1 | 0.532280  | -1.270054 | 0.244043  |
| 63 | 1 | 1.903292  | -1.518275 | 1.312714  |
| 64 | 8 | 5.676271  | -2.944557 | 0.013901  |
| 65 | 1 | 5.887380  | -3.541036 | -0.720893 |
| 66 | 1 | 5.357556  | -1.399271 | -1.335761 |
| 67 | 1 | 3.096216  | -0.800865 | -2.338215 |
| 68 | 1 | 1.671525  | -1.707924 | -1.843873 |
| 69 | 1 | 2.835646  | 1.128129  | 1.956808  |
| 70 | 1 | 4.458823  | 1.711333  | 1.640485  |
| 71 | 6 | 1.337168  | 3.558730  | -1.292154 |
| 72 | 1 | 2.076815  | 4.362966  | -1.342618 |
| 73 | 1 | 0.523955  | 3.879725  | -0.633094 |
| 74 | 1 | 2.512618  | 1.618268  | -1.665818 |
| 75 | 1 | 4.239808  | 0.709166  | -0.711966 |
| 76 | 6 | 6.135943  | -0.170767 | 0.803594  |
| 77 | 1 | 6.892153  | -0.955073 | 0.889478  |
| 78 | 1 | 6.392623  | 0.453016  | -0.062267 |
| 79 | 1 | 6.203404  | 0.449460  | 1.703050  |
| 80 | 6 | 4.399526  | -1.495748 | 1.999449  |
| 81 | 1 | 4.118209  | -0.750440 | 2.751167  |
| 82 | 1 | 3.598566  | -2.235952 | 1.935120  |

|    |   |          |           |           |
|----|---|----------|-----------|-----------|
| 83 | 1 | 5.277864 | -2.027621 | 2.371817  |
| 84 | 1 | 3.772389 | 3.228729  | -0.042681 |
| 85 | 1 | 0.929656 | 3.386361  | -2.288858 |

## C2

B3LYP/6-31G(d)//B3LYP/6-31G(d)

HF = -1325.2928466 hartrees (-831634.514169966 kcal/mol)

Imaginary Frequencies: none found

Zero-point correction = 0.790064 (Hartree/Particle)

mPW1PW91/6-31+G(d,p)//B3LYP/6-31G(d)

HF = -1325.1222667 hartrees (-831527.473576917 kcal/mol)

Coordinates (from last standard orientation):

| Center<br>Number | Atomic<br>Number | Coordinates (Angstroms) |           |           |
|------------------|------------------|-------------------------|-----------|-----------|
|                  |                  | X                       | Y         | Z         |
| 1                | 6                | 2.859758                | -1.200822 | -1.641338 |
| 2                | 6                | 2.433681                | -0.255610 | -0.448989 |
| 3                | 6                | 3.749739                | 0.274688  | 0.212183  |
| 4                | 6                | 4.789176                | -0.789969 | 0.711955  |
| 5                | 6                | 5.073341                | -1.744851 | -0.480593 |
| 6                | 6                | 3.805798                | -2.300787 | -1.141603 |
| 7                | 1                | 3.293188                | -2.973976 | -0.446784 |
| 8                | 6                | 1.610061                | 0.872260  | -1.013421 |
| 9                | 6                | 2.188032                | 2.229535  | -0.948258 |

|    |   |           |           |           |
|----|---|-----------|-----------|-----------|
| 10 | 6 | 2.793027  | 2.590525  | 0.450385  |
| 11 | 1 | 1.994065  | 3.068299  | 1.022539  |
| 12 | 6 | 3.388014  | 1.390427  | 1.208272  |
| 13 | 6 | 0.410207  | 0.574154  | -1.839512 |
| 14 | 1 | 0.709105  | 0.944079  | -2.838291 |
| 15 | 1 | 0.265135  | -0.501736 | -1.938033 |
| 16 | 6 | -0.974290 | 1.233174  | -1.531373 |
| 17 | 1 | -1.553426 | 1.078083  | -2.444171 |
| 18 | 1 | -0.857906 | 2.309409  | -1.432069 |
| 19 | 6 | -1.722583 | 0.630217  | -0.311298 |
| 20 | 1 | -1.177306 | -0.273710 | -0.015271 |
| 21 | 6 | -1.609682 | 1.549063  | 0.938274  |
| 22 | 6 | -2.224130 | 0.838511  | 2.153490  |
| 23 | 1 | -1.586696 | -0.020099 | 2.403633  |
| 24 | 6 | -2.164895 | 2.975497  | 0.812238  |
| 25 | 1 | -1.846566 | 3.559041  | 1.685320  |
| 26 | 1 | -1.801716 | 3.495519  | -0.078575 |
| 27 | 1 | -3.255238 | 2.999257  | 0.793933  |
| 28 | 6 | -3.178184 | 0.108308  | -0.630298 |
| 29 | 6 | -3.687425 | -0.609364 | 0.677484  |
| 30 | 1 | -2.912964 | -1.369585 | 0.879324  |
| 31 | 6 | -3.652061 | 0.339136  | 1.890451  |
| 32 | 1 | -4.002461 | -0.180538 | 2.786554  |
| 33 | 1 | -4.332855 | 1.187133  | 1.750845  |
| 34 | 1 | -2.206460 | 1.512069  | 3.022146  |
| 35 | 6 | -3.073125 | -0.973281 | -1.742775 |
| 36 | 1 | -2.789462 | -0.517821 | -2.700353 |
| 37 | 1 | -2.267107 | -1.675408 | -1.476694 |

|    |   |           |           |           |
|----|---|-----------|-----------|-----------|
| 38 | 6 | -5.001736 | -1.457878 | 0.548251  |
| 39 | 6 | -4.822555 | -2.439571 | -0.637635 |
| 40 | 1 | -4.077077 | -3.196154 | -0.349757 |
| 41 | 6 | -4.365454 | -1.777641 | -1.939392 |
| 42 | 1 | -5.158061 | -1.133342 | -2.338238 |
| 43 | 1 | -4.195520 | -2.545161 | -2.704519 |
| 44 | 6 | -6.289362 | -0.623539 | 0.374982  |
| 45 | 1 | -7.163272 | -1.282463 | 0.436904  |
| 46 | 1 | -6.395877 | 0.125621  | 1.167684  |
| 47 | 1 | -6.346177 | -0.103822 | -0.583899 |
| 48 | 6 | -5.180657 | -2.317597 | 1.821343  |
| 49 | 1 | -5.481077 | -1.723941 | 2.690958  |
| 50 | 1 | -5.965918 | -3.064781 | 1.658158  |
| 51 | 1 | -4.260415 | -2.857247 | 2.078308  |
| 52 | 6 | -4.090712 | 1.256392  | -1.132758 |
| 53 | 1 | -4.882359 | 0.884443  | -1.785753 |
| 54 | 1 | -4.581801 | 1.799032  | -0.322869 |
| 55 | 1 | -3.523814 | 1.988114  | -1.719125 |
| 56 | 1 | 4.091598  | -2.915142 | -2.006097 |
| 57 | 8 | -0.163219 | 1.665323  | 1.130393  |
| 58 | 1 | -0.023927 | 2.131132  | 1.971746  |
| 59 | 1 | -5.761688 | -2.983251 | -0.801492 |
| 60 | 6 | 1.496270  | -1.054428 | 0.513585  |
| 61 | 1 | 1.055126  | -0.409366 | 1.272832  |
| 62 | 1 | 0.683855  | -1.530914 | -0.040344 |
| 63 | 1 | 2.067927  | -1.838797 | 1.001568  |
| 64 | 8 | 5.897132  | -2.796742 | 0.001759  |
| 65 | 1 | 6.244940  | -3.292436 | -0.755559 |

|    |   |          |           |           |
|----|---|----------|-----------|-----------|
| 66 | 1 | 5.617881 | -1.155963 | -1.240634 |
| 67 | 1 | 3.369588 | -0.601424 | -2.407853 |
| 68 | 1 | 1.983620 | -1.652831 | -2.113519 |
| 69 | 1 | 2.671547 | 1.013822  | 1.945613  |
| 70 | 1 | 4.268903 | 1.714609  | 1.766242  |
| 71 | 6 | 1.454530 | 3.422182  | -1.563664 |
| 72 | 1 | 2.153142 | 4.260902  | -1.641451 |
| 73 | 1 | 0.625549 | 3.742152  | -0.928218 |
| 74 | 1 | 3.081283 | 2.031100  | -1.585532 |
| 75 | 1 | 4.299361 | 0.766595  | -0.607239 |
| 76 | 6 | 6.114039 | -0.052894 | 1.029478  |
| 77 | 1 | 6.916670 | -0.788253 | 1.128021  |
| 78 | 1 | 6.392533 | 0.649355  | 0.233366  |
| 79 | 1 | 6.059494 | 0.503654  | 1.970493  |
| 80 | 6 | 4.392519 | -1.577349 | 1.982060  |
| 81 | 1 | 3.934134 | -0.920560 | 2.729170  |
| 82 | 1 | 3.711254 | -2.410383 | 1.792979  |
| 83 | 1 | 5.287227 | -2.016347 | 2.429323  |
| 84 | 1 | 3.557958 | 3.351611  | 0.267398  |
| 85 | 1 | 1.072703 | 3.220861  | -2.569066 |

-----

**TS (C2-D2)**

B3LYP/6-31G(d)//B3LYP/6-31G(d)

HF = -1325.2929496 hartrees (-831634.578803496 kcal/mol)

Imaginary Frequencies: 1 (-41.8966 1/cm)

Zero-point correction = 0.789791 (Hartree/Particle)

mPW1PW91/6-31+G(d,p)//B3LYP/6-31G(d)

HF = -1325.1220757 hartrees (-831527.353722507 kcal/mol)

Coordinates (from last standard orientation):

| -----  |        |                         |           |           |
|--------|--------|-------------------------|-----------|-----------|
| Center | Atomic | Coordinates (Angstroms) |           |           |
| Number | Number | X                       | Y         | Z         |
| -----  |        |                         |           |           |
| 1      | 6      | 2.947406                | -1.102628 | -1.696453 |
| 2      | 6      | 2.458099                | -0.282257 | -0.431903 |
| 3      | 6      | 3.749227                | 0.282456  | 0.253523  |
| 4      | 6      | 4.832779                | -0.752808 | 0.711001  |
| 5      | 6      | 5.196135                | -1.594360 | -0.544965 |
| 6      | 6      | 3.980163                | -2.165046 | -1.288053 |
| 7      | 1      | 3.521274                | -2.949379 | -0.678048 |
| 8      | 6      | 1.580156                | 0.841450  | -0.943824 |
| 9      | 6      | 2.136620                | 2.212431  | -0.867631 |
| 10     | 6      | 2.754829                | 2.567196  | 0.522471  |
| 11     | 1      | 1.972959                | 3.062641  | 1.105029  |
| 12     | 6      | 3.341135                | 1.358382  | 1.273295  |
| 13     | 6      | 0.423869                | 0.520549  | -1.830327 |
| 14     | 1      | 0.761087                | 0.901089  | -2.812284 |
| 15     | 1      | 0.320599                | -0.559424 | -1.940931 |
| 16     | 6      | -0.997209               | 1.115677  | -1.588423 |
| 17     | 1      | -1.540463               | 0.892744  | -2.509140 |
| 18     | 1      | -0.948669               | 2.201241  | -1.526368 |
| 19     | 6      | -1.741258               | 0.506043  | -0.373702 |
| 20     | 1      | -1.267337               | -0.463173 | -0.169710 |

|    |   |           |           |           |
|----|---|-----------|-----------|-----------|
| 21 | 6 | -1.475825 | 1.323754  | 0.919210  |
| 22 | 6 | -2.059567 | 0.578612  | 2.126762  |
| 23 | 1 | -1.486155 | -0.346790 | 2.268912  |
| 24 | 6 | -1.924784 | 2.792757  | 0.929424  |
| 25 | 1 | -1.473598 | 3.297949  | 1.792881  |
| 26 | 1 | -1.622974 | 3.338943  | 0.032011  |
| 27 | 1 | -3.005681 | 2.893605  | 1.033115  |
| 28 | 6 | -3.255097 | 0.138697  | -0.632761 |
| 29 | 6 | -3.747140 | -0.620276 | 0.659403  |
| 30 | 1 | -3.039364 | -1.461862 | 0.753546  |
| 31 | 6 | -3.542035 | 0.226065  | 1.929968  |
| 32 | 1 | -3.879113 | -0.328357 | 2.810053  |
| 33 | 1 | -4.148464 | 1.139269  | 1.901309  |
| 34 | 1 | -1.925850 | 1.181824  | 3.036014  |
| 35 | 6 | -3.322171 | -0.871310 | -1.814093 |
| 36 | 1 | -3.063247 | -0.379143 | -2.759940 |
| 37 | 1 | -2.569290 | -1.658629 | -1.652751 |
| 38 | 6 | -5.143377 | -1.331343 | 0.570105  |
| 39 | 6 | -5.137463 | -2.240930 | -0.684405 |
| 40 | 1 | -4.456665 | -3.084654 | -0.496136 |
| 41 | 6 | -4.695985 | -1.538590 | -1.970142 |
| 42 | 1 | -5.445789 | -0.799179 | -2.277135 |
| 43 | 1 | -4.646555 | -2.265859 | -2.789783 |
| 44 | 6 | -6.349725 | -0.367813 | 0.541362  |
| 45 | 1 | -7.280004 | -0.943121 | 0.614223  |
| 46 | 1 | -6.333338 | 0.324528  | 1.390801  |
| 47 | 1 | -6.410306 | 0.227715  | -0.372122 |
| 48 | 6 | -5.324371 | -2.256947 | 1.795932  |

|    |   |           |           |           |
|----|---|-----------|-----------|-----------|
| 49 | 1 | -5.507409 | -1.699685 | 2.720598  |
| 50 | 1 | -6.188710 | -2.913045 | 1.641898  |
| 51 | 1 | -4.447473 | -2.897827 | 1.951852  |
| 52 | 6 | -4.080245 | 1.394434  | -1.011188 |
| 53 | 1 | -4.944790 | 1.135560  | -1.624647 |
| 54 | 1 | -4.463042 | 1.939128  | -0.145836 |
| 55 | 1 | -3.481354 | 2.096082  | -1.603138 |
| 56 | 1 | 4.323319  | -2.660527 | -2.206432 |
| 57 | 8 | -0.011836 | 1.319264  | 1.010961  |
| 58 | 1 | 0.233084  | 1.723636  | 1.859477  |
| 59 | 1 | -6.135141 | -2.678146 | -0.818227 |
| 60 | 6 | 1.594878  | -1.225715 | 0.454969  |
| 61 | 1 | 1.324981  | -0.754277 | 1.398490  |
| 62 | 1 | 0.667954  | -1.506055 | -0.049673 |
| 63 | 1 | 2.142615  | -2.140572 | 0.661335  |
| 64 | 8 | 6.063141  | -2.639006 | -0.126338 |
| 65 | 1 | 6.461756  | -3.046693 | -0.910660 |
| 66 | 1 | 5.727718  | -0.917875 | -1.237888 |
| 67 | 1 | 3.403848  | -0.411883 | -2.418524 |
| 68 | 1 | 2.105156  | -1.585968 | -2.198524 |
| 69 | 1 | 2.609538  | 0.948228  | 1.978003  |
| 70 | 1 | 4.197279  | 1.681655  | 1.868775  |
| 71 | 6 | 1.364084  | 3.394968  | -1.453777 |
| 72 | 1 | 2.031297  | 4.261250  | -1.499914 |
| 73 | 1 | 0.518281  | 3.664593  | -0.817450 |
| 74 | 1 | 3.015888  | 2.045056  | -1.530867 |
| 75 | 1 | 4.278682  | 0.823762  | -0.547692 |
| 76 | 6 | 6.108039  | 0.027254  | 1.115360  |

|    |   |          |           |           |
|----|---|----------|-----------|-----------|
| 77 | 1 | 6.947697 | -0.669647 | 1.178920  |
| 78 | 1 | 6.364215 | 0.801360  | 0.380760  |
| 79 | 1 | 6.003087 | 0.507382  | 2.093538  |
| 80 | 6 | 4.449880 | -1.647962 | 1.910591  |
| 81 | 1 | 3.989008 | -1.056348 | 2.709550  |
| 82 | 1 | 3.771003 | -2.464293 | 1.657363  |
| 83 | 1 | 5.351243 | -2.112059 | 2.317256  |
| 84 | 1 | 3.531510 | 3.316681  | 0.339090  |
| 85 | 1 | 0.998975 | 3.210046  | -2.468334 |

## D2

B3LYP/6-31G(d)//B3LYP/6-31G(d)

HF = -1325.2999789 hartrees (-831638.989759539 kcal/mol)

Imaginary Frequencies: none found

Zero-point correction = 0.792954 (Hartree/Particle)

mPW1PW91/6-31+G(d,p)//B3LYP/6-31G(d)

HF = -1325.132435 hartrees (-831533.85428685 kcal/mol)

Coordinates (from last standard orientation):

| Center<br>Number | Atomic<br>Number | Coordinates (Angstroms) |           |           |
|------------------|------------------|-------------------------|-----------|-----------|
|                  |                  | X                       | Y         | Z         |
| 1                | 6                | -2.927357               | -0.725053 | 1.820794  |
| 2                | 6                | -2.372001               | -0.289756 | 0.429388  |
| 3                | 6                | -3.630581               | 0.232965  | -0.365118 |

|    |   |           |           |           |
|----|---|-----------|-----------|-----------|
| 4  | 6 | -4.789608 | -0.788226 | -0.621544 |
| 5  | 6 | -5.229431 | -1.286169 | 0.785019  |
| 6  | 6 | -4.073025 | -1.746757 | 1.683266  |
| 7  | 1 | -3.699025 | -2.704851 | 1.307007  |
| 8  | 6 | -1.306872 | 0.901860  | 0.594880  |
| 9  | 6 | -1.988322 | 2.273783  | 0.434983  |
| 10 | 6 | -2.604454 | 2.429016  | -0.983213 |
| 11 | 1 | -1.865433 | 2.871527  | -1.667468 |
| 12 | 6 | -3.193160 | 1.109032  | -1.548095 |
| 13 | 6 | -0.393414 | 0.745288  | 1.820396  |
| 14 | 1 | -0.883784 | 1.266554  | 2.650024  |
| 15 | 1 | -0.357710 | -0.308971 | 2.104969  |
| 16 | 6 | 1.069240  | 1.212210  | 1.686691  |
| 17 | 1 | 1.555616  | 1.003433  | 2.642848  |
| 18 | 1 | 1.137459  | 2.292717  | 1.538143  |
| 19 | 6 | 1.764942  | 0.430897  | 0.558488  |
| 20 | 1 | 1.405616  | -0.604310 | 0.645891  |
| 21 | 6 | 1.247004  | 0.903183  | -0.806125 |
| 22 | 6 | 1.636801  | -0.077245 | -1.906358 |
| 23 | 1 | 1.156533  | -1.042937 | -1.714448 |
| 24 | 6 | 1.479613  | 2.348233  | -1.233575 |
| 25 | 1 | 0.752319  | 2.641282  | -1.999993 |
| 26 | 1 | 1.428712  | 3.063069  | -0.413571 |
| 27 | 1 | 2.463953  | 2.439808  | -1.694720 |
| 28 | 6 | 3.334647  | 0.285269  | 0.605091  |
| 29 | 6 | 3.695404  | -0.736589 | -0.539791 |
| 30 | 1 | 3.099268  | -1.630926 | -0.291046 |
| 31 | 6 | 3.170855  | -0.268283 | -1.912008 |

|    |   |           |           |           |
|----|---|-----------|-----------|-----------|
| 32 | 1 | 3.399960  | -1.012393 | -2.679250 |
| 33 | 1 | 3.666000  | 0.655264  | -2.232806 |
| 34 | 1 | 1.293116  | 0.279195  | -2.886384 |
| 35 | 6 | 3.717560  | -0.369145 | 1.961060  |
| 36 | 1 | 3.555495  | 0.338857  | 2.782934  |
| 37 | 1 | 3.051273  | -1.225438 | 2.145346  |
| 38 | 6 | 5.167392  | -1.279559 | -0.555822 |
| 39 | 6 | 5.477958  | -1.833702 | 0.858961  |
| 40 | 1 | 4.885643  | -2.748725 | 1.008561  |
| 41 | 6 | 5.171199  | -0.862424 | 2.002063  |
| 42 | 1 | 5.862898  | -0.011867 | 1.975485  |
| 43 | 1 | 5.349576  | -1.357766 | 2.963885  |
| 44 | 6 | 6.230432  | -0.244600 | -0.982927 |
| 45 | 1 | 7.198083  | -0.744920 | -1.103249 |
| 46 | 1 | 5.986644  | 0.214990  | -1.947722 |
| 47 | 1 | 6.373951  | 0.558799  | -0.257339 |
| 48 | 6 | 5.262233  | -2.468972 | -1.539366 |
| 49 | 1 | 5.228474  | -2.152070 | -2.587187 |
| 50 | 1 | 6.213793  | -2.993122 | -1.396302 |
| 51 | 1 | 4.457946  | -3.197182 | -1.375561 |
| 52 | 6 | 4.034113  | 1.663231  | 0.509662  |
| 53 | 1 | 5.029562  | 1.635254  | 0.954678  |
| 54 | 1 | 4.161259  | 2.020659  | -0.514521 |
| 55 | 1 | 3.471619  | 2.423941  | 1.062362  |
| 56 | 1 | -4.467534 | -1.955821 | 2.686624  |
| 57 | 8 | -0.321704 | 0.742428  | -0.657707 |
| 58 | 1 | -0.771983 | 1.050077  | -1.465774 |
| 59 | 1 | 6.530339  | -2.141416 | 0.900579  |

|    |   |           |           |           |
|----|---|-----------|-----------|-----------|
| 60 | 6 | -1.654607 | -1.501780 | -0.209262 |
| 61 | 1 | -1.528581 | -1.403940 | -1.289959 |
| 62 | 1 | -0.662399 | -1.643272 | 0.231136  |
| 63 | 1 | -2.207237 | -2.420927 | -0.032453 |
| 64 | 8 | -6.171271 | -2.335173 | 0.596880  |
| 65 | 1 | -6.583182 | -2.536947 | 1.451216  |
| 66 | 1 | -5.719358 | -0.428383 | 1.279650  |
| 67 | 1 | -3.295790 | 0.156481  | 2.364027  |
| 68 | 1 | -2.146854 | -1.172907 | 2.443472  |
| 69 | 1 | -2.479409 | 0.564875  | -2.188286 |
| 70 | 1 | -4.029824 | 1.346368  | -2.208232 |
| 71 | 6 | -1.226848 | 3.541129  | 0.844201  |
| 72 | 1 | -1.917109 | 4.390451  | 0.804340  |
| 73 | 1 | -0.399708 | 3.774207  | 0.170161  |
| 74 | 1 | -2.821829 | 2.195047  | 1.145599  |
| 75 | 1 | -4.116666 | 0.936282  | 0.326456  |
| 76 | 6 | -5.997149 | -0.026960 | -1.222434 |
| 77 | 1 | -6.891318 | -0.649367 | -1.132394 |
| 78 | 1 | -6.188749 | 0.918437  | -0.698580 |
| 79 | 1 | -5.857218 | 0.194954  | -2.285510 |
| 80 | 6 | -4.473266 | -1.955183 | -1.581336 |
| 81 | 1 | -3.998453 | -1.586285 | -2.498496 |
| 82 | 1 | -3.830399 | -2.724396 | -1.151500 |
| 83 | 1 | -5.404137 | -2.450733 | -1.867084 |
| 84 | 1 | -3.401930 | 3.176250  | -0.913105 |
| 85 | 1 | -0.841468 | 3.488876  | 1.866348  |

-----

Figure S5

**A4**

B3LYP/6-31G(d)//B3LYP/6-31G(d)

HF = -1325.2928738 hartrees (-831634.531238238 kcal/mol)

Imaginary Frequencies: none found

Zero-point correction = 0.789474 (Hartree/Particle)

mPW1PW91/6-31+G(d,p)//B3LYP/6-31G(d)

HF = -1325.1233606 hartrees (-831528.160010106 kcal/mol)

Coordinates (from last standard orientation):

| -----  |        |                         |           |           |  |
|--------|--------|-------------------------|-----------|-----------|--|
| Center | Atomic | Coordinates (Angstroms) |           |           |  |
| Number | Number | X                       | Y         | Z         |  |
| -----  |        |                         |           |           |  |
| 1      | 6      | 3.227911                | -0.974819 | -1.596547 |  |
| 2      | 6      | 2.615809                | -0.549170 | -0.246475 |  |
| 3      | 6      | 3.696484                | 0.283089  | 0.512934  |  |
| 4      | 6      | 5.048724                | -0.440900 | 0.819818  |  |
| 5      | 6      | 5.579556                | -0.955953 | -0.551517 |  |
| 6      | 6      | 4.548341                | -1.740486 | -1.376251 |  |
| 7      | 1      | 4.364267                | -2.704711 | -0.891415 |  |
| 8      | 6      | 1.264440                | 0.404292  | -0.454775 |  |
| 9      | 6      | 1.629785                | 1.810196  | -0.288777 |  |
| 10     | 6      | 2.184534                | 2.198737  | 1.036184  |  |
| 11     | 1      | 1.311119                | 2.417784  | 1.668655  |  |
| 12     | 6      | 3.042297                | 1.067080  | 1.664478  |  |
| 13     | 6      | 0.408751                | 0.007299  | -1.668675 |  |

|    |   |           |           |           |
|----|---|-----------|-----------|-----------|
| 14 | 1 | 0.964972  | 0.188805  | -2.595592 |
| 15 | 1 | 0.263569  | -1.077099 | -1.618162 |
| 16 | 6 | -0.979640 | 0.677878  | -1.790315 |
| 17 | 1 | -1.472806 | 0.206506  | -2.645584 |
| 18 | 1 | -0.846405 | 1.722015  | -2.083046 |
| 19 | 6 | -1.884486 | 0.602928  | -0.528604 |
| 20 | 1 | -1.329151 | 0.053015  | 0.244455  |
| 21 | 6 | -2.088586 | 2.006103  | 0.108953  |
| 22 | 6 | -2.849630 | 1.869526  | 1.436954  |
| 23 | 1 | -2.187625 | 1.359878  | 2.148904  |
| 24 | 6 | -2.724100 | 3.083725  | -0.779335 |
| 25 | 1 | -2.656349 | 4.057110  | -0.274672 |
| 26 | 1 | -2.231882 | 3.177141  | -1.751051 |
| 27 | 1 | -3.783432 | 2.895807  | -0.955758 |
| 28 | 6 | -3.206154 | -0.241096 | -0.702382 |
| 29 | 6 | -3.874852 | -0.334578 | 0.719389  |
| 30 | 1 | -3.083210 | -0.763909 | 1.357768  |
| 31 | 6 | -4.151308 | 1.065397  | 1.300376  |
| 32 | 1 | -4.602245 | 0.982412  | 2.293511  |
| 33 | 1 | -4.876243 | 1.614180  | 0.687546  |
| 34 | 1 | -3.053713 | 2.866654  | 1.850729  |
| 35 | 6 | -2.794813 | -1.679884 | -1.122986 |
| 36 | 1 | -2.379374 | -1.677734 | -2.139190 |
| 37 | 1 | -1.989778 | -2.024815 | -0.455094 |
| 38 | 6 | -5.054775 | -1.357008 | 0.874953  |
| 39 | 6 | -4.569840 | -2.733001 | 0.349533  |
| 40 | 1 | -3.821538 | -3.126965 | 1.053818  |
| 41 | 6 | -3.945695 | -2.692437 | -1.048074 |

|    |   |           |           |           |
|----|---|-----------|-----------|-----------|
| 42 | 1 | -4.709331 | -2.460553 | -1.800297 |
| 43 | 1 | -3.565207 | -3.687178 | -1.310956 |
| 44 | 6 | -6.364327 | -0.938916 | 0.171882  |
| 45 | 1 | -7.167285 | -1.629841 | 0.454177  |
| 46 | 1 | -6.684063 | 0.065007  | 0.473602  |
| 47 | 1 | -6.297307 | -0.953820 | -0.918059 |
| 48 | 6 | -5.377850 | -1.535693 | 2.376692  |
| 49 | 1 | -5.886498 | -0.664633 | 2.803009  |
| 50 | 1 | -6.044597 | -2.394565 | 2.515060  |
| 51 | 1 | -4.471532 | -1.723484 | 2.966132  |
| 52 | 6 | -4.122362 | 0.357682  | -1.801044 |
| 53 | 1 | -4.735893 | -0.411103 | -2.274388 |
| 54 | 1 | -4.810707 | 1.116027  | -1.422004 |
| 55 | 1 | -3.536101 | 0.820009  | -2.602347 |
| 56 | 1 | 4.982394  | -1.974494 | -2.357358 |
| 57 | 8 | -0.718329 | 2.454728  | 0.424778  |
| 58 | 1 | -0.784625 | 3.391840  | 0.676407  |
| 59 | 1 | -5.408042 | -3.441259 | 0.367333  |
| 60 | 6 | 2.072730  | -1.779017 | 0.512138  |
| 61 | 1 | 1.150422  | -2.139389 | 0.045220  |
| 62 | 1 | 2.776477  | -2.609519 | 0.497474  |
| 63 | 1 | 1.849179  | -1.553848 | 1.559638  |
| 64 | 8 | 6.731072  | -1.746578 | -0.289952 |
| 65 | 1 | 7.162167  | -1.954134 | -1.133457 |
| 66 | 1 | 5.864285  | -0.060557 | -1.134128 |
| 67 | 1 | 3.427592  | -0.086405 | -2.212780 |
| 68 | 1 | 2.535366  | -1.604180 | -2.164324 |
| 69 | 1 | 2.432056  | 0.414828  | 2.297027  |

|    |   |          |           |           |
|----|---|----------|-----------|-----------|
| 70 | 1 | 3.780433 | 1.533888  | 2.319587  |
| 71 | 1 | 4.006205 | 1.055296  | -0.214903 |
| 72 | 6 | 6.066435 | 0.603767  | 1.337719  |
| 73 | 1 | 7.070285 | 0.172878  | 1.302530  |
| 74 | 1 | 6.068715 | 1.513672  | 0.723388  |
| 75 | 1 | 5.868363 | 0.892156  | 2.375392  |
| 76 | 6 | 4.978299 | -1.570461 | 1.869564  |
| 77 | 1 | 4.453463 | -1.234338 | 2.771310  |
| 78 | 1 | 4.489053 | -2.477039 | 1.510622  |
| 79 | 1 | 5.991711 | -1.855262 | 2.161266  |
| 80 | 1 | 2.753305 | 3.130734  | 0.945408  |
| 81 | 1 | 0.716152 | 0.175932  | 0.467135  |
| 82 | 6 | 1.723149 | 2.775907  | -1.401443 |
| 83 | 1 | 1.615909 | 3.809475  | -1.060324 |
| 84 | 1 | 2.762890 | 2.684859  | -1.768808 |
| 85 | 1 | 1.059665 | 2.566600  | -2.238199 |

-----

**TS (A4-B4)**

B3LYP/6-31G(d)//B3LYP/6-31G(d)

HF = -1325.2923137 hartrees (-831634.179769887 kcal/mol)

Imaginary Frequencies: 1 (-38.2880 1/cm)

Zero-point correction = 0.789995 (Hartree/Particle)

mPW1PW91/6-31+G(d,p)//B3LYP/6-31G(d)

HF = -1325.1216819 hartrees (-831527.106609069 kcal/mol)

Coordinates (from last standard orientation):

-----

| Center | Atomic | Coordinates (Angstroms) |           |           |
|--------|--------|-------------------------|-----------|-----------|
| Number | Number | X                       | Y         | Z         |
| -----  |        |                         |           |           |
| 1      | 6      | 3.283441                | -1.164204 | -1.463082 |
| 2      | 6      | 2.682609                | -0.648747 | -0.136436 |
| 3      | 6      | 3.731549                | 0.326789  | 0.492171  |
| 4      | 6      | 5.151160                | -0.259665 | 0.794056  |
| 5      | 6      | 5.664713                | -0.863814 | -0.545237 |
| 6      | 6      | 4.666710                | -1.803805 | -1.234506 |
| 7      | 1      | 4.580215                | -2.724027 | -0.647612 |
| 8      | 6      | 1.258952                | 0.162046  | -0.356467 |
| 9      | 6      | 1.488070                | 1.623962  | -0.303719 |
| 10     | 6      | 2.077471                | 2.155624  | 0.973466  |
| 11     | 1      | 1.257773                | 2.348685  | 1.674031  |
| 12     | 6      | 3.075086                | 1.147436  | 1.611855  |
| 13     | 6      | 0.437569                | -0.390589 | -1.537505 |
| 14     | 1      | 1.016828                | -0.316438 | -2.464017 |
| 15     | 1      | 0.310979                | -1.463438 | -1.353816 |
| 16     | 6      | -0.954029               | 0.224897  | -1.803005 |
| 17     | 1      | -1.428301               | -0.414040 | -2.552800 |
| 18     | 1      | -0.829322               | 1.188062  | -2.304083 |
| 19     | 6      | -1.879626               | 0.388832  | -0.568976 |
| 20     | 1      | -1.397776               | -0.119726 | 0.277791  |
| 21     | 6      | -1.957409               | 1.870399  | -0.112783 |
| 22     | 6      | -2.754286               | 1.985071  | 1.196073  |
| 23     | 1      | -2.173080               | 1.499463  | 1.989752  |
| 24     | 6      | -2.439001               | 2.901588  | -1.138962 |
| 25     | 1      | -2.289603               | 3.913721  | -0.739412 |

|    |   |           |           |           |
|----|---|-----------|-----------|-----------|
| 26 | 1 | -1.913292 | 2.836804  | -2.094499 |
| 27 | 1 | -3.506339 | 2.798630  | -1.336831 |
| 28 | 6 | -3.280862 | -0.332863 | -0.685775 |
| 29 | 6 | -3.986796 | -0.173035 | 0.711517  |
| 30 | 1 | -3.257819 | -0.592072 | 1.426302  |
| 31 | 6 | -4.130473 | 1.309333  | 1.098510  |
| 32 | 1 | -4.618652 | 1.402547  | 2.072657  |
| 33 | 1 | -4.771191 | 1.847134  | 0.389782  |
| 34 | 1 | -2.859886 | 3.041911  | 1.476293  |
| 35 | 6 | -3.016220 | -1.848711 | -0.907695 |
| 36 | 1 | -2.588029 | -2.021355 | -1.902956 |
| 37 | 1 | -2.263454 | -2.186700 | -0.178883 |
| 38 | 6 | -5.272000 | -1.039956 | 0.956218  |
| 39 | 6 | -4.922257 | -2.513727 | 0.628312  |
| 40 | 1 | -4.232002 | -2.885180 | 1.400610  |
| 41 | 6 | -4.272150 | -2.716295 | -0.742402 |
| 42 | 1 | -4.992578 | -2.501874 | -1.541059 |
| 43 | 1 | -3.996263 | -3.770347 | -0.868399 |
| 44 | 6 | -6.513081 | -0.584309 | 0.158629  |
| 45 | 1 | -7.388788 | -1.155797 | 0.487538  |
| 46 | 1 | -6.738711 | 0.474419  | 0.330586  |
| 47 | 1 | -6.417542 | -0.734552 | -0.918886 |
| 48 | 6 | -5.645901 | -0.986821 | 2.455966  |
| 49 | 1 | -6.071255 | -0.021271 | 2.749121  |
| 50 | 1 | -6.401912 | -1.748630 | 2.678117  |
| 51 | 1 | -4.778611 | -1.186771 | 3.097714  |
| 52 | 6 | -4.098201 | 0.211833  | -1.885817 |
| 53 | 1 | -4.775419 | -0.544947 | -2.285589 |

|    |   |           |           |           |
|----|---|-----------|-----------|-----------|
| 54 | 1 | -4.714630 | 1.077020  | -1.632211 |
| 55 | 1 | -3.443764 | 0.505858  | -2.713438 |
| 56 | 1 | 5.076520  | -2.105039 | -2.207831 |
| 57 | 8 | -0.544026 | 2.222332  | 0.229108  |
| 58 | 1 | -0.511940 | 3.187107  | 0.356677  |
| 59 | 1 | -5.829341 | -3.126107 | 0.709560  |
| 60 | 6 | 2.276795  | -1.844737 | 0.755822  |
| 61 | 1 | 1.373715  | -2.321951 | 0.360432  |
| 62 | 1 | 3.047153  | -2.613488 | 0.790407  |
| 63 | 1 | 2.066811  | -1.541091 | 1.786163  |
| 64 | 8 | 6.889700  | -1.530017 | -0.269252 |
| 65 | 1 | 7.291742  | -1.797431 | -1.110223 |
| 66 | 1 | 5.847348  | -0.011231 | -1.225184 |
| 67 | 1 | 3.390268  | -0.331668 | -2.173360 |
| 68 | 1 | 2.624685  | -1.899189 | -1.936193 |
| 69 | 1 | 2.561182  | 0.499779  | 2.329092  |
| 70 | 1 | 3.805551  | 1.724845  | 2.182266  |
| 71 | 1 | 3.947479  | 1.052772  | -0.311264 |
| 72 | 6 | 6.103685  | 0.904222  | 1.160569  |
| 73 | 1 | 7.136773  | 0.550890  | 1.109793  |
| 74 | 1 | 6.002251  | 1.750041  | 0.467977  |
| 75 | 1 | 5.932300  | 1.273235  | 2.177251  |
| 76 | 6 | 5.215552  | -1.282442 | 1.948255  |
| 77 | 1 | 4.696026  | -0.904180 | 2.836236  |
| 78 | 1 | 4.793091  | -2.256202 | 1.697762  |
| 79 | 1 | 6.259195  | -1.453961 | 2.221480  |
| 80 | 1 | 2.568308  | 3.114862  | 0.775593  |
| 81 | 1 | 0.729828  | -0.053237 | 0.577741  |

|    |   |          |          |           |
|----|---|----------|----------|-----------|
| 82 | 6 | 1.650943 | 2.445905 | -1.530988 |
| 83 | 1 | 1.544054 | 3.515970 | -1.333005 |
| 84 | 1 | 2.698238 | 2.293626 | -1.845453 |
| 85 | 1 | 1.013697 | 2.140725 | -2.358958 |

#### B4

B3LYP/6-31G(d)//B3LYP/6-31G(d)

HF = -1325.2957415 hartrees (-831636.330748665 kcal/mol)

Imaginary Frequencies: none found

Zero-point correction = 0.792784 (Hartree/Particle)

mPW1PW91/6-31+G(d,p)//B3LYP/6-31G(d)

HF = -1325.1267061 hartrees (-831530.259344811 kcal/mol)

Coordinates (from last standard orientation):

| Center<br>Number | Atomic<br>Number | Coordinates (Angstroms) |           |           |
|------------------|------------------|-------------------------|-----------|-----------|
|                  |                  | X                       | Y         | Z         |
| 1                | 6                | 3.322161                | -1.451534 | -1.184072 |
| 2                | 6                | 2.728509                | -0.728752 | 0.053285  |
| 3                | 6                | 3.739307                | 0.408446  | 0.423613  |
| 4                | 6                | 5.220091                | -0.004959 | 0.724897  |
| 5                | 6                | 5.711388                | -0.811863 | -0.508441 |
| 6                | 6                | 4.760831                | -1.936969 | -0.931927 |
| 7                | 1                | 4.782514                | -2.725406 | -0.172349 |
| 8                | 6                | 1.258580                | -0.092477 | -0.198782 |

|    |   |           |           |           |
|----|---|-----------|-----------|-----------|
| 9  | 6 | 1.239207  | 1.434076  | -0.379656 |
| 10 | 6 | 2.030918  | 2.210752  | 0.707711  |
| 11 | 1 | 1.340728  | 2.620876  | 1.454104  |
| 12 | 6 | 3.088232  | 1.359162  | 1.434004  |
| 13 | 6 | 0.485509  | -0.900952 | -1.267967 |
| 14 | 1 | 1.076884  | -0.961253 | -2.185687 |
| 15 | 1 | 0.430421  | -1.927102 | -0.887482 |
| 16 | 6 | -0.939788 | -0.472876 | -1.685720 |
| 17 | 1 | -1.392716 | -1.346117 | -2.160458 |
| 18 | 1 | -0.879168 | 0.267292  | -2.488087 |
| 19 | 6 | -1.856258 | 0.043788  | -0.556829 |
| 20 | 1 | -1.474661 | -0.345458 | 0.396192  |
| 21 | 6 | -1.779024 | 1.574775  | -0.412850 |
| 22 | 6 | -2.560584 | 2.066081  | 0.805102  |
| 23 | 1 | -2.090661 | 1.665375  | 1.710512  |
| 24 | 6 | -2.020425 | 2.454599  | -1.633643 |
| 25 | 1 | -1.766976 | 3.496806  | -1.405659 |
| 26 | 1 | -1.457008 | 2.149193  | -2.515147 |
| 27 | 1 | -3.080310 | 2.438985  | -1.893527 |
| 28 | 6 | -3.353287 | -0.490143 | -0.611875 |
| 29 | 6 | -4.080347 | 0.047206  | 0.675167  |
| 30 | 1 | -3.449792 | -0.311262 | 1.506563  |
| 31 | 6 | -4.021234 | 1.581973  | 0.750839  |
| 32 | 1 | -4.517461 | 1.942550  | 1.655622  |
| 33 | 1 | -4.547253 | 2.049197  | -0.089539 |
| 34 | 1 | -2.521544 | 3.162267  | 0.867152  |
| 35 | 6 | -3.302933 | -2.040848 | -0.502229 |
| 36 | 1 | -2.871636 | -2.478120 | -1.410005 |

|    |   |           |           |           |
|----|---|-----------|-----------|-----------|
| 37 | 1 | -2.634433 | -2.315738 | 0.327334  |
| 38 | 6 | -5.489924 | -0.562708 | 1.000028  |
| 39 | 6 | -5.350174 | -2.106066 | 1.000269  |
| 40 | 1 | -4.758851 | -2.400361 | 1.880197  |
| 41 | 6 | -4.678367 | -2.675420 | -0.251292 |
| 42 | 1 | -5.326131 | -2.541711 | -1.126012 |
| 43 | 1 | -4.551459 | -3.759043 | -0.141398 |
| 44 | 6 | -6.616862 | -0.116035 | 0.043659  |
| 45 | 1 | -7.580782 | -0.472041 | 0.424779  |
| 46 | 1 | -6.683590 | 0.976074  | -0.023351 |
| 47 | 1 | -6.508494 | -0.507029 | -0.970191 |
| 48 | 6 | -5.907081 | -0.143825 | 2.429060  |
| 49 | 1 | -6.197965 | 0.910293  | 2.490700  |
| 50 | 1 | -6.774678 | -0.731679 | 2.748964  |
| 51 | 1 | -5.103863 | -0.320803 | 3.155178  |
| 52 | 6 | -4.033593 | -0.104488 | -1.950047 |
| 53 | 1 | -4.820603 | -0.812121 | -2.214278 |
| 54 | 1 | -4.500222 | 0.883848  | -1.932613 |
| 55 | 1 | -3.316094 | -0.119514 | -2.777387 |
| 56 | 1 | 5.142934  | -2.396687 | -1.853575 |
| 57 | 8 | -0.275904 | 1.877302  | 0.038608  |
| 58 | 1 | -0.233679 | 2.839233  | 0.196597  |
| 59 | 1 | -6.341505 | -2.556893 | 1.134481  |
| 60 | 6 | 2.490357  | -1.771774 | 1.174599  |
| 61 | 1 | 1.615508  | -2.387006 | 0.934185  |
| 62 | 1 | 3.327069  | -2.456698 | 1.300385  |
| 63 | 1 | 2.301580  | -1.301467 | 2.145025  |
| 64 | 8 | 7.005973  | -1.317469 | -0.203829 |

|    |   |          |           |           |
|----|---|----------|-----------|-----------|
| 65 | 1 | 7.369440 | -1.728532 | -1.003346 |
| 66 | 1 | 5.779265 | -0.095209 | -1.347916 |
| 67 | 1 | 3.328810 | -0.768407 | -2.045943 |
| 68 | 1 | 2.709648 | -2.312055 | -1.471796 |
| 69 | 1 | 2.629364 | 0.803025  | 2.258278  |
| 70 | 1 | 3.812881 | 2.038912  | 1.888283  |
| 71 | 1 | 3.847716 | 0.993173  | -0.504697 |
| 72 | 6 | 6.089017 | 1.274302  | 0.803214  |
| 73 | 1 | 7.144280 | 0.995190  | 0.744469  |
| 74 | 1 | 5.875181 | 1.963773  | -0.023907 |
| 75 | 1 | 5.944712 | 1.815793  | 1.743996  |
| 76 | 6 | 5.434984 | -0.781511 | 2.041620  |
| 77 | 1 | 4.930801 | -0.281272 | 2.876686  |
| 78 | 1 | 5.085131 | -1.813893 | 2.005494  |
| 79 | 1 | 6.502541 | -0.818964 | 2.271094  |
| 80 | 1 | 2.521382 | 3.064798  | 0.226031  |
| 81 | 1 | 0.745177 | -0.231996 | 0.759095  |
| 82 | 6 | 1.484615 | 1.965461  | -1.780227 |
| 83 | 1 | 1.330958 | 3.048655  | -1.833808 |
| 84 | 1 | 2.533450 | 1.777955  | -2.034160 |
| 85 | 1 | 0.869660 | 1.477381  | -2.536380 |

-----

**Figure S6**

**A5 (24)**

B3LYP/6-31G(d)//B3LYP/6-31G(d)

HF = -1325.2922916 hartrees (-831634.165901916 kcal/mol)

Imaginary Frequencies: none found

Zero-point correction = 0.788821 (Hartree/Particle)

mPW1PW91/6-31+G(d,p)//B3LYP/6-31G(d)

HF = -1325.1233298 hartrees (-831528.140682798 kcal/mol)

Coordinates (from last standard orientation):

| -----  |        |                         |           |           |  |
|--------|--------|-------------------------|-----------|-----------|--|
| Center | Atomic | Coordinates (Angstroms) |           |           |  |
| Number | Number | X                       | Y         | Z         |  |
| -----  |        |                         |           |           |  |
| 1      | 6      | 3.155252                | -0.937906 | -1.615106 |  |
| 2      | 6      | 2.574710                | -0.481198 | -0.261580 |  |
| 3      | 6      | 3.698299                | 0.291103  | 0.496007  |  |
| 4      | 6      | 5.004671                | -0.510014 | 0.802673  |  |
| 5      | 6      | 5.504436                | -1.053965 | -0.569837 |  |
| 6      | 6      | 4.429996                | -1.778172 | -1.395447 |  |
| 7      | 1      | 4.193012                | -2.732078 | -0.913038 |  |
| 8      | 6      | 1.283607                | 0.561525  | -0.477861 |  |
| 9      | 6      | 1.748048                | 1.931517  | -0.323016 |  |
| 10     | 6      | 2.302878                | 2.290314  | 1.004884  |  |
| 11     | 1      | 1.414090                | 2.544609  | 1.607990  |  |
| 12     | 6      | 3.089545                | 1.116288  | 1.646402  |  |
| 13     | 6      | 0.382580                | 0.215041  | -1.672528 |  |
| 14     | 1      | 0.912917                | 0.406729  | -2.613096 |  |
| 15     | 1      | 0.209881                | -0.865442 | -1.647682 |  |
| 16     | 6      | -0.987317               | 0.932046  | -1.717296 |  |
| 17     | 1      | -1.493377               | 0.572689  | -2.618963 |  |
| 18     | 1      | -0.824538               | 1.998749  | -1.889788 |  |

|    |   |           |           |           |
|----|---|-----------|-----------|-----------|
| 19 | 6 | -1.896182 | 0.736269  | -0.469104 |
| 20 | 1 | -1.302138 | 0.208150  | 0.290771  |
| 21 | 6 | -2.230833 | 2.089576  | 0.224044  |
| 22 | 6 | -2.997459 | 1.827301  | 1.530335  |
| 23 | 1 | -2.299482 | 1.355532  | 2.234992  |
| 24 | 6 | -2.950266 | 3.137394  | -0.637763 |
| 25 | 1 | -3.991377 | 2.874582  | -0.828797 |
| 26 | 1 | -2.955670 | 4.098630  | -0.107565 |
| 27 | 1 | -2.457815 | 3.293753  | -1.601912 |
| 28 | 6 | -3.138994 | -0.213524 | -0.696869 |
| 29 | 6 | -3.805468 | -0.428966 | 0.712422  |
| 30 | 1 | -2.982072 | -0.810275 | 1.340948  |
| 31 | 6 | -4.216075 | 0.913114  | 1.344879  |
| 32 | 1 | -4.670646 | 0.746011  | 2.325582  |
| 33 | 1 | -4.980956 | 1.417440  | 0.742762  |
| 34 | 1 | -3.300614 | 2.784939  | 1.977489  |
| 35 | 6 | -2.604919 | -1.589831 | -1.181905 |
| 36 | 1 | -2.187039 | -1.500744 | -2.193263 |
| 37 | 1 | -1.777499 | -1.899210 | -0.523665 |
| 38 | 6 | -4.890167 | -1.558702 | 0.812222  |
| 39 | 6 | -4.285065 | -2.860109 | 0.226964  |
| 40 | 1 | -3.505398 | -3.218933 | 0.916023  |
| 41 | 6 | -3.665681 | -2.698810 | -1.163871 |
| 42 | 1 | -4.445717 | -2.495391 | -1.907466 |
| 43 | 1 | -3.202049 | -3.643686 | -1.473448 |
| 44 | 6 | -6.229145 | -1.224055 | 0.119455  |
| 45 | 1 | -6.966864 | -2.000361 | 0.354024  |
| 46 | 1 | -6.640904 | -0.272374 | 0.474083  |

|    |   |           |           |           |
|----|---|-----------|-----------|-----------|
| 47 | 1 | -6.154189 | -1.169943 | -0.968725 |
| 48 | 6 | -5.201869 | -1.835952 | 2.301421  |
| 49 | 1 | -5.783398 | -1.032407 | 2.764974  |
| 50 | 1 | -5.794588 | -2.753391 | 2.393564  |
| 51 | 1 | -4.284996 | -1.975351 | 2.887973  |
| 52 | 6 | -4.101047 | 0.353120  | -1.773861 |
| 53 | 1 | -4.621722 | -0.445607 | -2.305733 |
| 54 | 1 | -4.872521 | 1.006393  | -1.361102 |
| 55 | 1 | -3.561681 | 0.928215  | -2.533367 |
| 56 | 1 | 4.849507  | -2.033646 | -2.377515 |
| 57 | 8 | -0.917831 | 2.648133  | 0.570815  |
| 58 | 1 | -1.097582 | 3.469547  | 1.058674  |
| 59 | 1 | -5.057079 | -3.639937 | 0.207216  |
| 60 | 6 | 1.955786  | -1.674761 | 0.494470  |
| 61 | 1 | 1.014109  | -1.976876 | 0.024844  |
| 62 | 1 | 2.607059  | -2.547356 | 0.478886  |
| 63 | 1 | 1.744937  | -1.438645 | 1.542131  |
| 64 | 8 | 6.607856  | -1.910173 | -0.307676 |
| 65 | 1 | 7.031788  | -2.136062 | -1.150090 |
| 66 | 1 | 5.840375  | -0.176633 | -1.151981 |
| 67 | 1 | 3.403391  | -0.060800 | -2.228722 |
| 68 | 1 | 2.425471  | -1.525855 | -2.180482 |
| 69 | 1 | 2.443690  | 0.501931  | 2.281891  |
| 70 | 1 | 3.853927  | 1.541656  | 2.299110  |
| 71 | 1 | 4.045935  | 1.045509  | -0.234919 |
| 72 | 6 | 6.081341  | 0.473484  | 1.321338  |
| 73 | 1 | 7.058502  | -0.014774 | 1.283659  |
| 74 | 1 | 6.135089  | 1.382880  | 0.708806  |

|    |   |          |           |           |
|----|---|----------|-----------|-----------|
| 75 | 1 | 5.901557 | 0.770216  | 2.359956  |
| 76 | 6 | 4.868499 | -1.635273 | 1.850558  |
| 77 | 1 | 4.354838 | -1.274058 | 2.748963  |
| 78 | 1 | 4.336144 | -2.514470 | 1.485470  |
| 79 | 1 | 5.863714 | -1.972595 | 2.148461  |
| 80 | 1 | 2.909728 | 3.198414  | 0.937384  |
| 81 | 1 | 0.737411 | 0.376568  | 0.457518  |
| 82 | 6 | 1.701676 | 2.946724  | -1.387122 |
| 83 | 1 | 2.535748 | 3.652060  | -1.326503 |
| 84 | 1 | 1.603721 | 2.527095  | -2.389873 |
| 85 | 1 | 0.780148 | 3.519465  | -1.181003 |

#### TS (A5-C3)

B3LYP/6-31G(d)//B3LYP/6-31G(d)

HF = -1325.2898909 hartrees (-831632.659438659 kcal/mol)

Imaginary Frequencies: 1 (-223.2825 1/cm)

Zero-point correction = 0.786511 (Hartree/Particle)

mPW1PW91/6-31+G(d,p)//B3LYP/6-31G(d)

HF = -1325.1250975 hartrees (-831529.249932225 kcal/mol)

Coordinates (from last standard orientation):

| Center | Atomic | Coordinates (Angstroms) |           |           |
|--------|--------|-------------------------|-----------|-----------|
| Number | Number | X                       | Y         | Z         |
| 1      | 6      | 2.652964                | -1.298294 | -1.435850 |

|    |   |           |           |           |
|----|---|-----------|-----------|-----------|
| 2  | 6 | 2.382911  | -0.261916 | -0.301888 |
| 3  | 6 | 3.784961  | 0.264377  | 0.164320  |
| 4  | 6 | 4.840660  | -0.795309 | 0.633908  |
| 5  | 6 | 4.971614  | -1.841982 | -0.504777 |
| 6  | 6 | 3.626660  | -2.397213 | -0.982187 |
| 7  | 1 | 3.185640  | -3.008435 | -0.187700 |
| 8  | 6 | 1.565583  | 0.931197  | -0.904242 |
| 9  | 6 | 1.982091  | 2.258510  | -0.722159 |
| 10 | 6 | 3.075457  | 2.634359  | 0.253416  |
| 11 | 1 | 2.715342  | 3.470214  | 0.868930  |
| 12 | 6 | 3.606303  | 1.473532  | 1.091872  |
| 13 | 6 | 0.405737  | 0.612159  | -1.862328 |
| 14 | 1 | 0.737584  | 0.895229  | -2.870783 |
| 15 | 1 | 0.269893  | -0.468431 | -1.888877 |
| 16 | 6 | -0.987866 | 1.246693  | -1.602321 |
| 17 | 1 | -1.569062 | 1.032421  | -2.502814 |
| 18 | 1 | -0.910474 | 2.333568  | -1.572186 |
| 19 | 6 | -1.742687 | 0.718782  | -0.346473 |
| 20 | 1 | -1.141199 | -0.096738 | 0.072471  |
| 21 | 6 | -1.776402 | 1.763223  | 0.805355  |
| 22 | 6 | -2.394498 | 1.135280  | 2.062867  |
| 23 | 1 | -1.701330 | 0.368747  | 2.433174  |
| 24 | 6 | -2.416698 | 3.123610  | 0.500161  |
| 25 | 1 | -3.502848 | 3.055749  | 0.427097  |
| 26 | 1 | -2.192499 | 3.820136  | 1.317638  |
| 27 | 1 | -2.045977 | 3.569763  | -0.426771 |
| 28 | 6 | -3.134875 | 0.038306  | -0.660051 |
| 29 | 6 | -3.645625 | -0.585203 | 0.693323  |

|    |   |           |           |           |
|----|---|-----------|-----------|-----------|
| 30 | 1 | -2.818130 | -1.243059 | 1.010057  |
| 31 | 6 | -3.758709 | 0.485354  | 1.793897  |
| 32 | 1 | -4.109724 | 0.036116  | 2.727076  |
| 33 | 1 | -4.500249 | 1.248997  | 1.531664  |
| 34 | 1 | -2.480622 | 1.897344  | 2.850627  |
| 35 | 6 | -2.881804 | -1.135024 | -1.647946 |
| 36 | 1 | -2.590114 | -0.753194 | -2.634473 |
| 37 | 1 | -2.033743 | -1.732956 | -1.278887 |
| 38 | 6 | -4.870628 | -1.562506 | 0.602495  |
| 39 | 6 | -4.549286 | -2.636671 | -0.467589 |
| 40 | 1 | -3.754845 | -3.289607 | -0.075560 |
| 41 | 6 | -4.090137 | -2.068062 | -1.812446 |
| 42 | 1 | -4.915484 | -1.540484 | -2.305853 |
| 43 | 1 | -3.818005 | -2.888663 | -2.487487 |
| 44 | 6 | -6.216898 | -0.873103 | 0.294674  |
| 45 | 1 | -7.030580 | -1.602377 | 0.382912  |
| 46 | 1 | -6.429684 | -0.066962 | 1.005894  |
| 47 | 1 | -6.269827 | -0.452980 | -0.711844 |
| 48 | 6 | -5.031985 | -2.302609 | 1.950863  |
| 49 | 1 | -5.425700 | -1.655284 | 2.741437  |
| 50 | 1 | -5.738749 | -3.132450 | 1.836500  |
| 51 | 1 | -4.080754 | -2.725207 | 2.298042  |
| 52 | 6 | -4.117595 | 1.040177  | -1.318395 |
| 53 | 1 | -4.849998 | 0.528850  | -1.945468 |
| 54 | 1 | -4.684030 | 1.629869  | -0.594271 |
| 55 | 1 | -3.590352 | 1.743713  | -1.972054 |
| 56 | 1 | 3.797678  | -3.076829 | -1.827456 |
| 57 | 8 | -0.347502 | 2.018193  | 1.085212  |

|    |   |           |           |           |
|----|---|-----------|-----------|-----------|
| 58 | 1 | -0.286566 | 2.534491  | 1.906337  |
| 59 | 1 | -5.428480 | -3.277909 | -0.609816 |
| 60 | 6 | 1.521652  | -0.920465 | 0.800861  |
| 61 | 1 | 0.554943  | -1.231434 | 0.392737  |
| 62 | 1 | 1.998623  | -1.812730 | 1.200178  |
| 63 | 1 | 1.321721  | -0.243028 | 1.635208  |
| 64 | 8 | 5.818363  | -2.883021 | -0.034205 |
| 65 | 1 | 6.041002  | -3.460868 | -0.780387 |
| 66 | 1 | 5.447274  | -1.327728 | -1.359387 |
| 67 | 1 | 3.073932  | -0.780738 | -2.309292 |
| 68 | 1 | 1.725712  | -1.774619 | -1.766855 |
| 69 | 1 | 2.920813  | 1.248435  | 1.917262  |
| 70 | 1 | 4.550306  | 1.776449  | 1.549912  |
| 71 | 1 | 4.231241  | 0.670394  | -0.759772 |
| 72 | 6 | 6.215382  | -0.094910 | 0.765360  |
| 73 | 1 | 6.998333  | -0.855686 | 0.818963  |
| 74 | 1 | 6.429320  | 0.550883  | -0.095997 |
| 75 | 1 | 6.286479  | 0.512167  | 1.673615  |
| 76 | 6 | 4.540267  | -1.469549 | 1.990920  |
| 77 | 1 | 4.245047  | -0.727988 | 2.741935  |
| 78 | 1 | 3.760921  | -2.232828 | 1.942488  |
| 79 | 1 | 5.440492  | -1.970566 | 2.354283  |
| 80 | 1 | 3.886615  | 3.054931  | -0.358498 |
| 81 | 1 | 0.990603  | 1.640966  | 0.052557  |
| 82 | 6 | 1.397634  | 3.430762  | -1.473071 |
| 83 | 1 | 2.204170  | 4.142557  | -1.674968 |
| 84 | 1 | 0.934270  | 3.152363  | -2.419583 |
| 85 | 1 | 0.659078  | 3.952999  | -0.855432 |

-----

### C3

B3LYP/6-31G(d)//B3LYP/6-31G(d)

HF = -1325.2959605 hartrees (-831636.468173355 kcal/mol)

Imaginary Frequencies: none found

Zero-point correction = 0.789460 (Hartree/Particle)

mPW1PW91/6-31+G(d,p)//B3LYP/6-31G(d)

HF = -1325.1265879 hartrees (-831530.185173129 kcal/mol)

Coordinates (from last standard orientation):

-----

| Center<br>Number | Atomic<br>Number | Coordinates (Angstroms) |           |           |
|------------------|------------------|-------------------------|-----------|-----------|
|                  |                  | X                       | Y         | Z         |
| -----            |                  |                         |           |           |
| 1                | 6                | 2.605344                | -1.451439 | -1.268568 |
| 2                | 6                | 2.473652                | -0.219745 | -0.323261 |
| 3                | 6                | 3.901072                | 0.291963  | 0.072495  |
| 4                | 6                | 4.930594                | -0.778840 | 0.590715  |
| 5                | 6                | 4.931415                | -1.971940 | -0.400764 |
| 6                | 6                | 3.529133                | -2.520187 | -0.676976 |
| 7                | 1                | 3.108560                | -2.941366 | 0.243308  |
| 8                | 6                | 1.615281                | 0.866967  | -0.873598 |
| 9                | 6                | 1.889185                | 2.305708  | -0.638430 |
| 10               | 6                | 3.183057                | 2.676230  | 0.120886  |
| 11               | 1                | 2.974571                | 3.557288  | 0.738365  |
| 12               | 6                | 3.772332                | 1.541287  | 0.956337  |

|    |   |           |           |           |
|----|---|-----------|-----------|-----------|
| 13 | 6 | 0.387068  | 0.509044  | -1.639272 |
| 14 | 1 | 0.717327  | 0.694589  | -2.681468 |
| 15 | 1 | 0.195749  | -0.562310 | -1.591685 |
| 16 | 6 | -0.942797 | 1.286227  | -1.410752 |
| 17 | 1 | -1.506293 | 1.196875  | -2.342447 |
| 18 | 1 | -0.734941 | 2.348464  | -1.292451 |
| 19 | 6 | -1.794592 | 0.765053  | -0.213693 |
| 20 | 1 | -1.203920 | -0.007608 | 0.294736  |
| 21 | 6 | -1.971978 | 1.853106  | 0.886964  |
| 22 | 6 | -2.704472 | 1.244473  | 2.094840  |
| 23 | 1 | -2.024253 | 0.523650  | 2.567254  |
| 24 | 6 | -2.626799 | 3.173578  | 0.455973  |
| 25 | 1 | -3.694499 | 3.064880  | 0.260355  |
| 26 | 1 | -2.522397 | 3.906386  | 1.266001  |
| 27 | 1 | -2.161065 | 3.603756  | -0.435653 |
| 28 | 6 | -3.121819 | 0.023587  | -0.641056 |
| 29 | 6 | -3.746455 | -0.572850 | 0.675837  |
| 30 | 1 | -2.935209 | -1.189928 | 1.099771  |
| 31 | 6 | -4.008385 | 0.529851  | 1.717614  |
| 32 | 1 | -4.435505 | 0.098260  | 2.627304  |
| 33 | 1 | -4.747760 | 1.253071  | 1.353833  |
| 34 | 1 | -2.898260 | 2.031581  | 2.837080  |
| 35 | 6 | -2.732545 | -1.169377 | -1.558551 |
| 36 | 1 | -2.350946 | -0.805301 | -2.522013 |
| 37 | 1 | -1.909412 | -1.724953 | -1.081346 |
| 38 | 6 | -4.922287 | -1.595684 | 0.495859  |
| 39 | 6 | -4.460306 | -2.691096 | -0.499202 |
| 40 | 1 | -3.689479 | -3.302038 | -0.005682 |

|    |   |           |           |           |
|----|---|-----------|-----------|-----------|
| 41 | 6 | -3.884810 | -2.151464 | -1.811268 |
| 42 | 1 | -4.672169 | -1.671654 | -2.404836 |
| 43 | 1 | -3.517944 | -2.983824 | -2.424401 |
| 44 | 6 | -6.254649 | -0.967882 | 0.031755  |
| 45 | 1 | -7.048851 | -1.722254 | 0.075270  |
| 46 | 1 | -6.561647 | -0.141251 | 0.682376  |
| 47 | 1 | -6.225919 | -0.591548 | -0.993169 |
| 48 | 6 | -5.193678 | -2.300413 | 1.845667  |
| 49 | 1 | -5.685282 | -1.643775 | 2.570615  |
| 50 | 1 | -5.857405 | -3.158647 | 1.689924  |
| 51 | 1 | -4.268368 | -2.677111 | 2.299422  |
| 52 | 6 | -4.074231 | 0.967173  | -1.420710 |
| 53 | 1 | -4.700677 | 0.414555  | -2.123358 |
| 54 | 1 | -4.751055 | 1.523691  | -0.770106 |
| 55 | 1 | -3.520620 | 1.702344  | -2.014797 |
| 56 | 1 | 3.597447  | -3.351257 | -1.390895 |
| 57 | 8 | -0.600078 | 2.157736  | 1.290039  |
| 58 | 1 | -0.652023 | 2.774794  | 2.039244  |
| 59 | 1 | -5.299211 | -3.367406 | -0.706995 |
| 60 | 6 | 1.557326  | -0.596232 | 0.928383  |
| 61 | 1 | 0.810394  | -1.334893 | 0.630280  |
| 62 | 1 | 2.204596  | -1.025914 | 1.691751  |
| 63 | 1 | 1.035127  | 0.254639  | 1.376154  |
| 64 | 8 | 5.778523  | -2.977339 | 0.139371  |
| 65 | 1 | 5.939447  | -3.646529 | -0.543597 |
| 66 | 1 | 5.345604  | -1.603430 | -1.356724 |
| 67 | 1 | 3.018839  | -1.110519 | -2.227811 |
| 68 | 1 | 1.630996  | -1.897683 | -1.483645 |

|    |   |          |           |           |
|----|---|----------|-----------|-----------|
| 69 | 1 | 3.152102 | 1.337328  | 1.837110  |
| 70 | 1 | 4.748781 | 1.853355  | 1.334848  |
| 71 | 1 | 4.336709 | 0.631901  | -0.881463 |
| 72 | 6 | 6.342836 | -0.146476 | 0.550191  |
| 73 | 1 | 7.090069 | -0.932146 | 0.686802  |
| 74 | 1 | 6.540307 | 0.345707  | -0.410357 |
| 75 | 1 | 6.489594 | 0.590015  | 1.346173  |
| 76 | 6 | 4.691808 | -1.273692 | 2.036237  |
| 77 | 1 | 4.520948 | -0.435123 | 2.719472  |
| 78 | 1 | 3.855653 | -1.972624 | 2.131125  |
| 79 | 1 | 5.576789 | -1.810597 | 2.384827  |
| 80 | 1 | 3.937712 | 2.990466  | -0.611375 |
| 81 | 1 | 1.010439 | 2.580404  | -0.015123 |
| 82 | 6 | 1.789037 | 3.160145  | -1.941891 |
| 83 | 1 | 2.588298 | 2.884388  | -2.637200 |
| 84 | 1 | 0.831057 | 3.075850  | -2.455520 |
| 85 | 1 | 1.934398 | 4.207838  | -1.665122 |

-----

#### TS (C3-C4)

B3LYP/6-31G(d)//B3LYP/6-31G(d)

HF = -1325.2931965 hartrees (-831634.733735715 kcal/mol)

Imaginary Frequencies: 1 (-20.5860 1/cm)

Zero-point correction = 0.789442 (Hartree/Particle)

mPW1PW91/6-31+G(d,p)//B3LYP/6-31G(d)

HF = -1325.1241801 hartrees (-831528.674254551 kcal/mol)

Coordinates (from last standard orientation):

| -----  |        |                         |           |           |
|--------|--------|-------------------------|-----------|-----------|
| Center | Atomic | Coordinates (Angstroms) |           |           |
| Number | Number | X                       | Y         | Z         |
| -----  |        |                         |           |           |
| 1      | 6      | 2.034834                | -1.430082 | -0.813299 |
| 2      | 6      | 2.384113                | -0.061758 | -0.162978 |
| 3      | 6      | 3.947414                | 0.152668  | -0.160686 |
| 4      | 6      | 4.811103                | -1.042417 | 0.382405  |
| 5      | 6      | 4.362375                | -2.335571 | -0.347562 |
| 6      | 6      | 2.858521                | -2.585301 | -0.236226 |
| 7      | 1      | 2.602004                | -2.775746 | 0.812049  |
| 8      | 6      | 1.655554                | 1.091394  | -0.772373 |
| 9      | 6      | 2.145994                | 2.494215  | -0.591334 |
| 10     | 6      | 3.665940                | 2.643517  | -0.333697 |
| 11     | 1      | 3.831461                | 3.607495  | 0.158630  |
| 12     | 6      | 4.309601                | 1.509911  | 0.454879  |
| 13     | 6      | 0.405569                | 0.885396  | -1.548962 |
| 14     | 1      | 0.692143                | 1.280642  | -2.541685 |
| 15     | 1      | 0.184864                | -0.168304 | -1.687795 |
| 16     | 6      | -0.908809               | 1.637446  | -1.130364 |
| 17     | 1      | -1.476867               | 1.781181  | -2.052582 |
| 18     | 1      | -0.653288               | 2.628511  | -0.762916 |
| 19     | 6      | -1.763677               | 0.899357  | -0.062924 |
| 20     | 1      | -1.138245               | 0.104431  | 0.364542  |
| 21     | 6      | -2.042846               | 1.831287  | 1.155531  |
| 22     | 6      | -2.757759               | 1.026058  | 2.253787  |
| 23     | 1      | -2.037467               | 0.302393  | 2.658112  |

|    |   |           |           |           |
|----|---|-----------|-----------|-----------|
| 24 | 6 | -2.784054 | 3.143686  | 0.859291  |
| 25 | 1 | -3.839156 | 2.987645  | 0.630891  |
| 26 | 1 | -2.739645 | 3.786660  | 1.747365  |
| 27 | 1 | -2.333949 | 3.699384  | 0.031449  |
| 28 | 6 | -3.026568 | 0.139932  | -0.627303 |
| 29 | 6 | -3.634186 | -0.666522 | 0.581417  |
| 30 | 1 | -2.789334 | -1.276438 | 0.946448  |
| 31 | 6 | -3.995666 | 0.271399  | 1.748716  |
| 32 | 1 | -4.406587 | -0.305459 | 2.582233  |
| 33 | 1 | -4.781489 | 0.979429  | 1.459790  |
| 34 | 1 | -3.029824 | 1.697246  | 3.080530  |
| 35 | 6 | -4.027313 | 1.112664  | -1.303793 |
| 36 | 1 | -4.602359 | 0.614410  | -2.086495 |
| 37 | 1 | -4.751622 | 1.535776  | -0.605792 |
| 38 | 1 | -3.515435 | 1.952297  | -1.785883 |
| 39 | 1 | 2.596222  | -3.500357 | -0.782814 |
| 40 | 8 | -0.705856 | 2.182103  | 1.618193  |
| 41 | 1 | -0.808254 | 2.693754  | 2.437678  |
| 42 | 6 | 1.724846  | 0.007805  | 1.293917  |
| 43 | 1 | 0.760381  | 0.523847  | 1.337816  |
| 44 | 1 | 1.568569  | -1.017755 | 1.633724  |
| 45 | 1 | 2.389410  | 0.526279  | 1.983624  |
| 46 | 8 | 5.100570  | -3.420093 | 0.199928  |
| 47 | 1 | 4.969329  | -4.198613 | -0.362774 |
| 48 | 1 | 4.613924  | -2.210277 | -1.416343 |
| 49 | 1 | 2.219813  | -1.366839 | -1.894436 |
| 50 | 1 | 0.973053  | -1.660456 | -0.683161 |
| 51 | 1 | 4.020490  | 1.560698  | 1.510184  |

|    |   |           |           |           |
|----|---|-----------|-----------|-----------|
| 52 | 1 | 5.393501  | 1.650146  | 0.435664  |
| 53 | 1 | 4.208489  | 0.217137  | -1.229984 |
| 54 | 6 | 6.290866  | -0.795265 | 0.003245  |
| 55 | 1 | 6.862575  | -1.709751 | 0.177989  |
| 56 | 1 | 6.398382  | -0.527241 | -1.055501 |
| 57 | 1 | 6.745310  | -0.001539 | 0.603707  |
| 58 | 6 | 4.740677  | -1.225445 | 1.914053  |
| 59 | 1 | 5.061495  | -0.316014 | 2.432640  |
| 60 | 1 | 3.744408  | -1.487550 | 2.278964  |
| 61 | 1 | 5.415290  | -2.031319 | 2.211591  |
| 62 | 1 | 4.155185  | 2.714396  | -1.314225 |
| 63 | 1 | 1.592862  | 2.773798  | 0.332302  |
| 64 | 6 | 1.740052  | 3.504312  | -1.692706 |
| 65 | 1 | 2.163313  | 4.478547  | -1.432852 |
| 66 | 1 | 2.168941  | 3.210280  | -2.657278 |
| 67 | 1 | 0.666128  | 3.636176  | -1.815647 |
| 68 | 6 | -2.539688 | -0.886845 | -1.685704 |
| 69 | 1 | -2.162939 | -0.365910 | -2.576611 |
| 70 | 1 | -1.693550 | -1.453033 | -1.264177 |
| 71 | 6 | -4.729904 | -1.735324 | 0.232193  |
| 72 | 6 | -4.172859 | -2.649743 | -0.888965 |
| 73 | 1 | -3.367529 | -3.267714 | -0.463557 |
| 74 | 6 | -3.617386 | -1.897536 | -2.101607 |
| 75 | 1 | -4.426898 | -1.393738 | -2.642734 |
| 76 | 1 | -3.184926 | -2.611461 | -2.813490 |
| 77 | 6 | -6.094786 | -1.142075 | -0.179497 |
| 78 | 1 | -6.831345 | -1.948611 | -0.272211 |
| 79 | 1 | -6.475671 | -0.444641 | 0.574951  |

|    |   |           |           |           |
|----|---|-----------|-----------|-----------|
| 80 | 1 | -6.070022 | -0.616626 | -1.136513 |
| 81 | 6 | -4.974149 | -2.632718 | 1.467574  |
| 82 | 1 | -5.519686 | -2.112557 | 2.261704  |
| 83 | 1 | -5.576326 | -3.503382 | 1.183321  |
| 84 | 1 | -4.032406 | -3.005775 | 1.889386  |
| 85 | 1 | -4.957290 | -3.348192 | -1.206957 |

#### C4

B3LYP/6-31G(d)//B3LYP/6-31G(d)

HF = -1325.2989312 hartrees (-831638.332317312 kcal/mol)

Imaginary Frequencies: none found

Zero-point correction = 0.790497 (Hartree/Particle)

mPW1PW91/6-31+G(d,p)//B3LYP/6-31G(d)

HF = -1325.1293716 hartrees (-831531.931972716 kcal/mol)

Coordinates (from last standard orientation):

| Center<br>Number | Atomic<br>Number | Coordinates (Angstroms) |           |           |
|------------------|------------------|-------------------------|-----------|-----------|
|                  |                  | X                       | Y         | Z         |
| 1                | 6                | 1.868049                | -1.075232 | 0.666412  |
| 2                | 6                | 2.591587                | 0.281283  | 0.470396  |
| 3                | 6                | 3.714288                | 0.091175  | -0.713583 |
| 4                | 6                | 4.670346                | -1.145754 | -0.516819 |
| 5                | 6                | 3.815761                | -2.409979 | -0.228325 |
| 6                | 6                | 2.838053                | -2.230924 | 0.934057  |

|    |   |           |           |           |
|----|---|-----------|-----------|-----------|
| 7  | 1 | 3.394897  | -2.102375 | 1.867942  |
| 8  | 6 | 1.763541  | 1.350927  | -0.163143 |
| 9  | 6 | 2.344003  | 2.715216  | -0.239891 |
| 10 | 6 | 3.458816  | 2.527420  | -1.354836 |
| 11 | 1 | 3.958440  | 3.497985  | -1.446198 |
| 12 | 6 | 4.437627  | 1.415975  | -0.995479 |
| 13 | 6 | 0.471961  | 1.089033  | -0.813452 |
| 14 | 1 | 0.310925  | 1.734489  | -1.678023 |
| 15 | 1 | 0.343658  | 0.053047  | -1.114754 |
| 16 | 6 | -0.583337 | 1.461541  | 0.329778  |
| 17 | 1 | -1.014533 | 2.424892  | 0.053413  |
| 18 | 1 | -0.057344 | 1.620877  | 1.277270  |
| 19 | 6 | -1.665001 | 0.378061  | 0.597019  |
| 20 | 1 | -1.201030 | -0.591274 | 0.373819  |
| 21 | 6 | -1.951361 | 0.289170  | 2.129976  |
| 22 | 6 | -2.916599 | -0.879108 | 2.394106  |
| 23 | 1 | -2.366201 | -1.808809 | 2.199127  |
| 24 | 6 | -2.436600 | 1.582093  | 2.804741  |
| 25 | 1 | -3.458368 | 1.846808  | 2.528625  |
| 26 | 1 | -2.423514 | 1.443164  | 3.893005  |
| 27 | 1 | -1.788033 | 2.433985  | 2.577484  |
| 28 | 6 | -2.944626 | 0.454379  | -0.323238 |
| 29 | 6 | -3.806514 | -0.818841 | 0.023758  |
| 30 | 1 | -3.109830 | -1.661898 | -0.123631 |
| 31 | 6 | -4.175321 | -0.846058 | 1.519016  |
| 32 | 1 | -4.773019 | -1.733889 | 1.744224  |
| 33 | 1 | -4.802189 | 0.012214  | 1.788017  |
| 34 | 1 | -3.189825 | -0.889719 | 3.458583  |

|    |   |           |           |           |
|----|---|-----------|-----------|-----------|
| 35 | 6 | -3.708715 | 1.792957  | -0.146429 |
| 36 | 1 | -4.244432 | 2.066856  | -1.057114 |
| 37 | 1 | -4.448570 | 1.763339  | 0.655078  |
| 38 | 1 | -3.030738 | 2.624566  | 0.072079  |
| 39 | 1 | 2.252224  | -3.151284 | 1.055962  |
| 40 | 8 | -0.653933 | -0.035161 | 2.696275  |
| 41 | 1 | -0.780382 | -0.174591 | 3.649118  |
| 42 | 6 | 3.167130  | 0.756396  | 1.835085  |
| 43 | 1 | 2.365441  | 1.194391  | 2.439293  |
| 44 | 1 | 3.554936  | -0.092960 | 2.395568  |
| 45 | 1 | 3.975567  | 1.483343  | 1.749302  |
| 46 | 8 | 4.720086  | -3.480575 | 0.008681  |
| 47 | 1 | 4.214600  | -4.307007 | 0.049066  |
| 48 | 1 | 3.224065  | -2.613491 | -1.139737 |
| 49 | 1 | 1.305200  | -1.338533 | -0.235931 |
| 50 | 1 | 1.138585  | -0.979061 | 1.477383  |
| 51 | 1 | 5.049681  | 1.720064  | -0.140360 |
| 52 | 1 | 5.128661  | 1.276401  | -1.832592 |
| 53 | 1 | 3.125063  | -0.149571 | -1.611988 |
| 54 | 6 | 5.400424  | -1.388256 | -1.862920 |
| 55 | 1 | 5.910597  | -2.353475 | -1.816522 |
| 56 | 1 | 4.699783  | -1.416764 | -2.706674 |
| 57 | 1 | 6.153891  | -0.621778 | -2.067483 |
| 58 | 6 | 5.743504  | -0.942252 | 0.572382  |
| 59 | 1 | 6.360073  | -0.063050 | 0.360412  |
| 60 | 1 | 5.333082  | -0.832888 | 1.577741  |
| 61 | 1 | 6.402530  | -1.813027 | 0.585652  |
| 62 | 1 | 2.969419  | 2.324948  | -2.315893 |

|    |   |           |           |           |
|----|---|-----------|-----------|-----------|
| 63 | 1 | 2.885537  | 2.938051  | 0.682817  |
| 64 | 6 | 1.430789  | 3.899173  | -0.577459 |
| 65 | 1 | 2.041178  | 4.805724  | -0.629310 |
| 66 | 1 | 0.929188  | 3.790478  | -1.544085 |
| 67 | 1 | 0.672654  | 4.058280  | 0.193921  |
| 68 | 6 | -2.496421 | 0.341612  | -1.806449 |
| 69 | 1 | -1.963465 | 1.253854  | -2.107901 |
| 70 | 1 | -1.784344 | -0.492140 | -1.903666 |
| 71 | 6 | -4.993746 | -1.152215 | -0.948234 |
| 72 | 6 | -4.444536 | -1.165359 | -2.397366 |
| 73 | 1 | -3.788030 | -2.041053 | -2.512120 |
| 74 | 6 | -3.654833 | 0.087763  | -2.781985 |
| 75 | 1 | -4.319130 | 0.959158  | -2.824587 |
| 76 | 1 | -3.250255 | -0.026103 | -3.795338 |
| 77 | 6 | -6.201966 | -0.196923 | -0.835672 |
| 78 | 1 | -7.028726 | -0.580051 | -1.445201 |
| 79 | 1 | -6.567731 | -0.128410 | 0.194902  |
| 80 | 1 | -5.989656 | 0.816831  | -1.182582 |
| 81 | 6 | -5.508286 | -2.579339 | -0.648069 |
| 82 | 1 | -6.061450 | -2.636700 | 0.294979  |
| 83 | 1 | -6.192992 | -2.902212 | -1.440853 |
| 84 | 1 | -4.686517 | -3.304959 | -0.605220 |
| 85 | 1 | -5.276894 | -1.314384 | -3.096921 |

-----

#### TS (C4-D3)

B3LYP/6-31G(d)//B3LYP/6-31G(d)

HF = -1325.2980053 hartrees (-831637.751305803 kcal/mol)

Imaginary Frequencies: 1 (-32.0139 1/cm)

Zero-point correction = 0.790246 (Hartree/Particle)

mPW1PW91/6-31+G(d,p)//B3LYP/6-31G(d)

HF = -1325.1279553 hartrees (-831531.043230303 kcal/mol)

Coordinates (from last standard orientation):

| -----  |        |                         |           |           |  |
|--------|--------|-------------------------|-----------|-----------|--|
| Center | Atomic | Coordinates (Angstroms) |           |           |  |
| Number | Number | X                       | Y         | Z         |  |
| -----  |        |                         |           |           |  |
| 1      | 6      | 1.572432                | -0.945899 | 0.766770  |  |
| 2      | 6      | 2.443075                | 0.299288  | 0.464154  |  |
| 3      | 6      | 3.624617                | -0.142050 | -0.610547 |  |
| 4      | 6      | 4.412450                | -1.445520 | -0.209383 |  |
| 5      | 6      | 3.400191                | -2.570629 | 0.137681  |  |
| 6      | 6      | 2.391144                | -2.161190 | 1.210442  |  |
| 7      | 1      | 2.912124                | -1.988656 | 2.157901  |  |
| 8      | 6      | 1.793304                | 1.348217  | -0.365489 |  |
| 9      | 6      | 2.509757                | 2.641086  | -0.503109 |  |
| 10     | 6      | 3.704317                | 2.237147  | -1.477278 |  |
| 11     | 1      | 4.316548                | 3.138808  | -1.584313 |  |
| 12     | 6      | 4.513791                | 1.062640  | -0.944028 |  |
| 13     | 6      | 0.617249                | 1.115048  | -1.234534 |  |
| 14     | 1      | 0.794615                | 1.613711  | -2.193479 |  |
| 15     | 1      | 0.434131                | 0.059884  | -1.428166 |  |
| 16     | 6      | -0.685727               | 1.772402  | -0.600783 |  |
| 17     | 1      | -1.216888               | 2.226492  | -1.440047 |  |

|    |   |           |           |           |
|----|---|-----------|-----------|-----------|
| 18 | 1 | -0.384129 | 2.593506  | 0.048898  |
| 19 | 6 | -1.600356 | 0.798171  | 0.188619  |
| 20 | 1 | -1.045246 | -0.137920 | 0.312864  |
| 21 | 6 | -1.804148 | 1.284703  | 1.652988  |
| 22 | 6 | -2.592208 | 0.219589  | 2.433496  |
| 23 | 1 | -1.939742 | -0.655701 | 2.552449  |
| 24 | 6 | -2.430188 | 2.676070  | 1.835523  |
| 25 | 1 | -3.495680 | 2.690917  | 1.600821  |
| 26 | 1 | -2.328299 | 2.978216  | 2.885534  |
| 27 | 1 | -1.937448 | 3.440076  | 1.226533  |
| 28 | 6 | -2.916332 | 0.377833  | -0.571135 |
| 29 | 6 | -3.600019 | -0.733555 | 0.310196  |
| 30 | 1 | -2.813993 | -1.499246 | 0.431090  |
| 31 | 6 | -3.887894 | -0.215676 | 1.732579  |
| 32 | 1 | -4.353378 | -1.002311 | 2.333424  |
| 33 | 1 | -4.607184 | 0.611861  | 1.715530  |
| 34 | 1 | -2.810010 | 0.591874  | 3.444419  |
| 35 | 6 | -3.826286 | 1.600553  | -0.862010 |
| 36 | 1 | -4.431859 | 1.446236  | -1.756965 |
| 37 | 1 | -4.520138 | 1.819562  | -0.048459 |
| 38 | 1 | -3.240928 | 2.509549  | -1.038731 |
| 39 | 1 | 1.699528  | -2.994258 | 1.392138  |
| 40 | 8 | -0.442547 | 1.346999  | 2.168628  |
| 41 | 1 | -0.503168 | 1.581452  | 3.109433  |
| 42 | 6 | 2.985468  | 0.877021  | 1.801077  |
| 43 | 1 | 2.214335  | 1.506347  | 2.254466  |
| 44 | 1 | 3.191940  | 0.068433  | 2.501270  |
| 45 | 1 | 3.901782  | 1.459678  | 1.700073  |

|    |   |           |           |           |
|----|---|-----------|-----------|-----------|
| 46 | 8 | 4.156268  | -3.705877 | 0.535603  |
| 47 | 1 | 3.553666  | -4.459556 | 0.630009  |
| 48 | 1 | 2.839361  | -2.798662 | -0.787514 |
| 49 | 1 | 1.004740  | -1.244273 | -0.120598 |
| 50 | 1 | 0.844425  | -0.666314 | 1.533613  |
| 51 | 1 | 5.096478  | 1.373191  | -0.071763 |
| 52 | 1 | 5.240316  | 0.768549  | -1.708315 |
| 53 | 1 | 3.079926  | -0.410748 | -1.527882 |
| 54 | 6 | 5.198842  | -1.911721 | -1.461894 |
| 55 | 1 | 5.603427  | -2.908511 | -1.270769 |
| 56 | 1 | 4.554690  | -1.974177 | -2.347659 |
| 57 | 1 | 6.037581  | -1.248127 | -1.692309 |
| 58 | 6 | 5.424256  | -1.238964 | 0.936512  |
| 59 | 1 | 6.166402  | -0.478258 | 0.675527  |
| 60 | 1 | 4.962776  | -0.949647 | 1.882391  |
| 61 | 1 | 5.957563  | -2.176196 | 1.109308  |
| 62 | 1 | 3.286166  | 2.010490  | -2.465799 |
| 63 | 1 | 2.979009  | 2.908529  | 0.446024  |
| 64 | 6 | 1.776314  | 3.869203  | -1.056727 |
| 65 | 1 | 2.499244  | 4.683344  | -1.165343 |
| 66 | 1 | 1.329038  | 3.697836  | -2.040509 |
| 67 | 1 | 0.993705  | 4.215273  | -0.377007 |
| 68 | 6 | -2.505588 | -0.272449 | -1.921085 |
| 69 | 1 | -2.078258 | 0.482572  | -2.595216 |
| 70 | 1 | -1.711783 | -1.011820 | -1.729863 |
| 71 | 6 | -4.780388 | -1.526696 | -0.354271 |
| 72 | 6 | -4.292138 | -2.057207 | -1.727560 |
| 73 | 1 | -3.547278 | -2.847538 | -1.548919 |

|    |   |           |           |           |
|----|---|-----------|-----------|-----------|
| 74 | 6 | -3.661842 | -0.991226 | -2.628922 |
| 75 | 1 | -4.420786 | -0.268967 | -2.951367 |
| 76 | 1 | -3.286914 | -1.458240 | -3.548012 |
| 77 | 6 | -6.083719 | -0.715745 | -0.520877 |
| 78 | 1 | -6.888166 | -1.380201 | -0.857264 |
| 79 | 1 | -6.408645 | -0.271855 | 0.426799  |
| 80 | 1 | -6.002683 | 0.088801  | -1.254780 |
| 81 | 6 | -5.114063 | -2.761366 | 0.514480  |
| 82 | 1 | -5.617099 | -2.492601 | 1.449134  |
| 83 | 1 | -5.788727 | -3.430708 | -0.031625 |
| 84 | 1 | -4.212412 | -3.333901 | 0.765786  |
| 85 | 1 | -5.130297 | -2.540229 | -2.245929 |

### D3 (21+H<sup>+</sup>)

B3LYP/6-31G(d)//B3LYP/6-31G(d)

HF = -1325.3107582 hartrees (-831645.753878082 kcal/mol)

Imaginary Frequencies: none found

Zero-point correction = 0.792668 (Hartree/Particle)

mPW1PW91/6-31+G(d,p)//B3LYP/6-31G(d)

HF = -1325.1429776 hartrees (-831540.469873776 kcal/mol)

Coordinates (from last standard orientation):

| Center | Atomic | Coordinates (Angstroms) |   |   |
|--------|--------|-------------------------|---|---|
| Number | Number | X                       | Y | Z |

|    |   |           |           |           |
|----|---|-----------|-----------|-----------|
| 1  | 6 | -1.521175 | -1.265123 | -0.530189 |
| 2  | 6 | -2.292501 | 0.082822  | -0.561601 |
| 3  | 6 | -3.554983 | -0.002420 | 0.389883  |
| 4  | 6 | -4.453565 | -1.296330 | 0.293949  |
| 5  | 6 | -3.532241 | -2.544183 | 0.298619  |
| 6  | 6 | -2.427033 | -2.481952 | -0.758278 |
| 7  | 1 | -2.871677 | -2.482467 | -1.758946 |
| 8  | 6 | -1.422266 | 1.287129  | 0.003632  |
| 9  | 6 | -2.183882 | 2.634455  | -0.074978 |
| 10 | 6 | -3.510635 | 2.517827  | 0.713455  |
| 11 | 1 | -4.074792 | 3.443887  | 0.554395  |
| 12 | 6 | -4.362538 | 1.307185  | 0.326351  |
| 13 | 6 | -0.776743 | 1.052048  | 1.391807  |
| 14 | 1 | -1.326531 | 1.657176  | 2.117138  |
| 15 | 1 | -0.932910 | 0.015613  | 1.695364  |
| 16 | 6 | 0.729899  | 1.352480  | 1.541676  |
| 17 | 1 | 1.022720  | 1.003215  | 2.534909  |
| 18 | 1 | 0.914698  | 2.430437  | 1.531642  |
| 19 | 6 | 1.541161  | 0.626678  | 0.456241  |
| 20 | 1 | 1.067200  | -0.355806 | 0.330653  |
| 21 | 6 | 1.348418  | 1.331687  | -0.890646 |
| 22 | 6 | 1.819555  | 0.451799  | -2.040345 |
| 23 | 1 | 1.220171  | -0.466702 | -2.075625 |
| 24 | 6 | 1.814780  | 2.773170  | -1.058878 |
| 25 | 1 | 2.887963  | 2.797507  | -1.250960 |
| 26 | 1 | 1.319028  | 3.218600  | -1.926672 |
| 27 | 1 | 1.616645  | 3.397483  | -0.187620 |
| 28 | 6 | 3.050134  | 0.273602  | 0.751781  |

|    |   |           |           |           |
|----|---|-----------|-----------|-----------|
| 29 | 6 | 3.506149  | -0.637059 | -0.451922 |
| 30 | 1 | 2.781889  | -1.469538 | -0.440030 |
| 31 | 6 | 3.298692  | 0.058552  | -1.812608 |
| 32 | 1 | 3.582776  | -0.612066 | -2.627585 |
| 33 | 1 | 3.939196  | 0.941733  | -1.912700 |
| 34 | 1 | 1.706914  | 0.969553  | -3.001916 |
| 35 | 6 | 3.098739  | -0.591835 | 2.041256  |
| 36 | 1 | 2.863335  | 0.022762  | 2.918530  |
| 37 | 1 | 2.320769  | -1.368005 | 1.981639  |
| 38 | 6 | 4.888544  | -1.362631 | -0.298119 |
| 39 | 6 | 4.868306  | -2.125919 | 1.051834  |
| 40 | 1 | 4.165078  | -2.967183 | 0.961173  |
| 41 | 6 | 4.457582  | -1.274500 | 2.256290  |
| 42 | 1 | 5.229767  | -0.526848 | 2.474127  |
| 43 | 1 | 4.398662  | -1.906323 | 3.150523  |
| 44 | 6 | 6.115328  | -0.429109 | -0.381968 |
| 45 | 1 | 7.031031  | -1.030864 | -0.402162 |
| 46 | 1 | 6.107925  | 0.171663  | -1.298893 |
| 47 | 1 | 6.199417  | 0.255176  | 0.464646  |
| 48 | 6 | 5.037861  | -2.421572 | -1.415308 |
| 49 | 1 | 5.231049  | -1.974258 | -2.396255 |
| 50 | 1 | 5.886913  | -3.077249 | -1.192271 |
| 51 | 1 | 4.145665  | -3.055160 | -1.496593 |
| 52 | 6 | 3.901833  | 1.545981  | 0.985021  |
| 53 | 1 | 4.767723  | 1.332940  | 1.613617  |
| 54 | 1 | 4.288709  | 1.991743  | 0.066325  |
| 55 | 1 | 3.322054  | 2.313255  | 1.509775  |
| 56 | 1 | -1.815778 | -3.392135 | -0.696673 |

|    |   |           |           |           |
|----|---|-----------|-----------|-----------|
| 57 | 8 | -0.233824 | 1.469165  | -1.033213 |
| 58 | 1 | -0.527935 | 1.154725  | -1.908172 |
| 59 | 1 | 5.855776  | -2.571058 | 1.226897  |
| 60 | 6 | -2.693372 | 0.344820  | -2.039302 |
| 61 | 1 | -1.829405 | 0.338008  | -2.724997 |
| 62 | 1 | -3.328072 | -0.459417 | -2.405730 |
| 63 | 1 | -3.236381 | 1.275538  | -2.202031 |
| 64 | 8 | -4.356032 | -3.689151 | 0.117138  |
| 65 | 1 | -3.822333 | -4.481462 | 0.282554  |
| 66 | 1 | -3.046256 | -2.586019 | 1.291019  |
| 67 | 1 | -1.028978 | -1.405944 | 0.437389  |
| 68 | 1 | -0.722410 | -1.259144 | -1.283225 |
| 69 | 1 | -4.784942 | 1.453611  | -0.673781 |
| 70 | 1 | -5.216275 | 1.249758  | 1.007337  |
| 71 | 1 | -3.137090 | -0.056385 | 1.405947  |
| 72 | 6 | -5.326205 | -1.372062 | 1.571799  |
| 73 | 1 | -5.806002 | -2.352485 | 1.622911  |
| 74 | 1 | -4.725373 | -1.241775 | 2.480850  |
| 75 | 1 | -6.116697 | -0.615570 | 1.576476  |
| 76 | 6 | -5.416548 | -1.334847 | -0.914398 |
| 77 | 1 | -6.022124 | -0.424877 | -0.965997 |
| 78 | 1 | -4.917854 | -1.463054 | -1.878461 |
| 79 | 1 | -6.098302 | -2.180958 | -0.803526 |
| 80 | 1 | -3.290764 | 2.482592  | 1.789249  |
| 81 | 1 | -2.439810 | 2.801641  | -1.127444 |
| 82 | 6 | -1.400463 | 3.869072  | 0.391544  |
| 83 | 1 | -2.032570 | 4.754997  | 0.272774  |
| 84 | 1 | -1.122346 | 3.815173  | 1.449419  |

85      1      -0.497591   4.035256   -0.200006

-----

Figure S7

**A6**

B3LYP/6-31G(d)//B3LYP/6-31G(d)

HF = -1325.294389 hartrees (-831635.48204139 kcal/mol)

Imaginary Frequencies: none found

Zero-point correction = 0.789027 (Hartree/Particle)

mPW1PW91/6-31+G(d,p)//B3LYP/6-31G(d)

HF = -1325.1254244 hartrees (-831529.455065244 kcal/mol)

Coordinates (from last standard orientation):

-----

| Center | Atomic | Coordinates (Angstroms) |   |   |
|--------|--------|-------------------------|---|---|
| Number | Number | X                       | Y | Z |

-----

|    |   |           |           |           |
|----|---|-----------|-----------|-----------|
| 1  | 6 | -3.019086 | -1.644931 | -1.359856 |
| 2  | 6 | -3.111126 | -0.107744 | -1.242373 |
| 3  | 6 | -3.307490 | 0.283008  | 0.261438  |
| 4  | 6 | -4.443081 | -0.466502 | 1.057736  |
| 5  | 6 | -4.286795 | -1.990850 | 0.792216  |
| 6  | 6 | -4.208509 | -2.348758 | -0.696096 |
| 7  | 1 | -5.154948 | -2.100228 | -1.187814 |
| 8  | 6 | -1.807396 | 0.564191  | -1.809026 |
| 9  | 6 | -1.673409 | 1.989701  | -1.496958 |
| 10 | 6 | -2.184930 | 2.530700  | -0.245605 |

|    |   |           |           |           |
|----|---|-----------|-----------|-----------|
| 11 | 1 | -2.306914 | 3.619923  | -0.299241 |
| 12 | 6 | -3.371842 | 1.811950  | 0.418092  |
| 13 | 6 | -0.360573 | -0.082886 | -1.494128 |
| 14 | 1 | -0.455570 | -1.102364 | -1.875030 |
| 15 | 1 | 0.339358  | 0.419769  | -2.166950 |
| 16 | 6 | 0.190740  | -0.071832 | -0.050619 |
| 17 | 1 | 0.123557  | -1.085460 | 0.355867  |
| 18 | 1 | -0.451421 | 0.528962  | 0.593795  |
| 19 | 6 | 1.646781  | 0.475645  | 0.070599  |
| 20 | 1 | 1.856276  | 1.014618  | -0.863823 |
| 21 | 6 | 1.755953  | 1.597057  | 1.143680  |
| 22 | 6 | 3.169707  | 2.201450  | 1.115428  |
| 23 | 1 | 3.268362  | 2.763865  | 0.177521  |
| 24 | 6 | 1.334864  | 1.221244  | 2.570502  |
| 25 | 1 | 2.055073  | 0.559153  | 3.053594  |
| 26 | 1 | 1.271178  | 2.129986  | 3.182110  |
| 27 | 1 | 0.354613  | 0.735217  | 2.599675  |
| 28 | 6 | 2.764653  | -0.633856 | 0.149030  |
| 29 | 6 | 4.144003  | 0.117649  | 0.053559  |
| 30 | 1 | 4.063659  | 0.706409  | -0.876109 |
| 31 | 6 | 4.287682  | 1.151573  | 1.185269  |
| 32 | 1 | 5.246756  | 1.671011  | 1.103755  |
| 33 | 1 | 4.293122  | 0.666253  | 2.168363  |
| 34 | 1 | 3.273770  | 2.927446  | 1.934484  |
| 35 | 6 | 2.614967  | -1.514680 | 1.417347  |
| 36 | 1 | 3.011609  | -2.518471 | 1.255002  |
| 37 | 1 | 3.135978  | -1.109504 | 2.287025  |
| 38 | 1 | 1.564566  | -1.642036 | 1.700531  |

|    |   |           |           |           |
|----|---|-----------|-----------|-----------|
| 39 | 1 | -4.085605 | -3.435010 | -0.798583 |
| 40 | 8 | 0.817559  | 2.623844  | 0.669557  |
| 41 | 1 | 0.956523  | 3.405847  | 1.230234  |
| 42 | 6 | -4.234772 | 0.413748  | -2.174167 |
| 43 | 1 | -4.022223 | 0.136592  | -3.213797 |
| 44 | 1 | -5.212234 | 0.004185  | -1.925061 |
| 45 | 1 | -4.325271 | 1.507434  | -2.143976 |
| 46 | 8 | -5.374745 | -2.646135 | 1.431278  |
| 47 | 1 | -5.232265 | -3.603490 | 1.372976  |
| 48 | 1 | -3.335245 | -2.303999 | 1.260883  |
| 49 | 1 | -2.105907 | -1.997021 | -0.862494 |
| 50 | 1 | -2.936377 | -1.939121 | -2.414662 |
| 51 | 1 | -4.294394 | 2.207928  | -0.018421 |
| 52 | 1 | -3.388119 | 2.092498  | 1.474130  |
| 53 | 1 | -2.387036 | -0.047308 | 0.760954  |
| 54 | 6 | -4.212495 | -0.237034 | 2.571350  |
| 55 | 1 | -4.851719 | -0.914980 | 3.142194  |
| 56 | 1 | -3.171459 | -0.434609 | 2.858126  |
| 57 | 1 | -4.461072 | 0.784852  | 2.877037  |
| 58 | 6 | -5.884522 | -0.008110 | 0.742029  |
| 59 | 1 | -5.993806 | 1.075974  | 0.850391  |
| 60 | 1 | -6.226784 | -0.283146 | -0.257909 |
| 61 | 1 | -6.571295 | -0.480117 | 1.447843  |
| 62 | 1 | -1.250319 | 2.413150  | 0.371774  |
| 63 | 1 | -1.828950 | 0.477201  | -2.905114 |
| 64 | 6 | -0.885291 | 2.881386  | -2.377325 |
| 65 | 1 | -1.527548 | 3.708842  | -2.712614 |
| 66 | 1 | -0.083868 | 3.341450  | -1.780463 |

|    |   |           |           |           |
|----|---|-----------|-----------|-----------|
| 67 | 1 | -0.462968 | 2.376606  | -3.247533 |
| 68 | 6 | 2.624363  | -1.541213 | -1.103534 |
| 69 | 1 | 1.703645  | -2.137105 | -1.036401 |
| 70 | 1 | 2.523457  | -0.903482 | -1.995096 |
| 71 | 6 | 5.413467  | -0.773340 | -0.187277 |
| 72 | 6 | 5.134733  | -1.690229 | -1.405822 |
| 73 | 1 | 5.106240  | -1.063750 | -2.310114 |
| 74 | 6 | 3.822804  | -2.475941 | -1.320151 |
| 75 | 1 | 3.876829  | -3.223272 | -0.519198 |
| 76 | 1 | 3.671910  | -3.044357 | -2.246119 |
| 77 | 6 | 5.848593  | -1.610672 | 1.034611  |
| 78 | 1 | 6.806973  | -2.098557 | 0.821843  |
| 79 | 1 | 5.997454  | -0.984439 | 1.921570  |
| 80 | 1 | 5.138237  | -2.397401 | 1.297055  |
| 81 | 6 | 6.605544  | 0.135344  | -0.568600 |
| 82 | 1 | 6.979501  | 0.714892  | 0.281789  |
| 83 | 1 | 7.439828  | -0.476289 | -0.930920 |
| 84 | 1 | 6.338961  | 0.837181  | -1.368671 |
| 85 | 1 | 5.978154  | -2.379807 | -1.539189 |

-----

**TS (A6-B5)**

B3LYP/6-31G(d)//B3LYP/6-31G(d)

HF = -1325.2867663 hartrees (-831630.698720913 kcal/mol)

Imaginary Frequencies: 1 (-45.5886 1/cm)

Zero-point correction = 0.788399 (Hartree/Particle)

mPW1PW91/6-31+G(d,p)//B3LYP/6-31G(d)

HF = -1325.1183373 hartrees (-831525.007839123 kcal/mol)

Coordinates (from last standard orientation):

| -----  |        |                         |           |           |
|--------|--------|-------------------------|-----------|-----------|
| Center | Atomic | Coordinates (Angstroms) |           |           |
| Number | Number | X                       | Y         | Z         |
| -----  |        |                         |           |           |
| 1      | 6      | -2.900444               | -1.349194 | -1.583287 |
| 2      | 6      | -3.023787               | 0.167586  | -1.291685 |
| 3      | 6      | -3.330725               | 0.400465  | 0.233238  |
| 4      | 6      | -4.420632               | -0.512899 | 0.914466  |
| 5      | 6      | -4.180313               | -1.984276 | 0.478543  |
| 6      | 6      | -4.086081               | -2.151906 | -1.039481 |
| 7      | 1      | -5.032082               | -1.864005 | -1.510085 |
| 8      | 6      | -1.682669               | 0.920943  | -1.657827 |
| 9      | 6      | -1.508085               | 2.234464  | -1.020257 |
| 10     | 6      | -2.468664               | 2.793452  | -0.050923 |
| 11     | 1      | -2.873221               | 3.701669  | -0.533706 |
| 12     | 6      | -3.588876               | 1.892875  | 0.489065  |
| 13     | 6      | -0.338594               | 0.083771  | -1.776245 |
| 14     | 1      | -0.562787               | -0.698221 | -2.503801 |
| 15     | 1      | 0.412375                | 0.716292  | -2.256883 |
| 16     | 6      | 0.238046                | -0.535628 | -0.478224 |
| 17     | 1      | 0.434296                | -1.591590 | -0.685314 |
| 18     | 1      | -0.527580               | -0.533778 | 0.297917  |
| 19     | 6      | 1.530345                | 0.142963  | 0.067946  |
| 20     | 1      | 1.698010                | 1.045676  | -0.535659 |
| 21     | 6      | 1.328305                | 0.705685  | 1.501810  |

|    |   |           |           |           |
|----|---|-----------|-----------|-----------|
| 22 | 6 | 2.580916  | 1.487373  | 1.934022  |
| 23 | 1 | 2.630994  | 2.398717  | 1.323223  |
| 24 | 6 | 0.909198  | -0.300990 | 2.582515  |
| 25 | 1 | 1.722208  | -0.974401 | 2.856849  |
| 26 | 1 | 0.624225  | 0.242040  | 3.493272  |
| 27 | 1 | 0.052174  | -0.909221 | 2.279127  |
| 28 | 6 | 2.849297  | -0.700048 | -0.137013 |
| 29 | 6 | 4.045459  | 0.226821  | 0.296649  |
| 30 | 1 | 3.916902  | 1.133777  | -0.319226 |
| 31 | 6 | 3.882830  | 0.694837  | 1.754376  |
| 32 | 1 | 4.717756  | 1.341121  | 2.039891  |
| 33 | 1 | 3.910036  | -0.153033 | 2.449032  |
| 34 | 1 | 2.468926  | 1.812832  | 2.977716  |
| 35 | 6 | 2.790094  | -2.050870 | 0.622573  |
| 36 | 1 | 3.390503  | -2.814490 | 0.124620  |
| 37 | 1 | 3.157969  | -1.984566 | 1.648597  |
| 38 | 1 | 1.768947  | -2.444168 | 0.668302  |
| 39 | 1 | -3.935608 | -3.213221 | -1.277846 |
| 40 | 8 | 0.223186  | 1.656248  | 1.340522  |
| 41 | 1 | 0.037261  | 2.012038  | 2.225894  |
| 42 | 6 | -4.105105 | 0.758461  | -2.233236 |
| 43 | 1 | -3.840935 | 0.555980  | -3.278693 |
| 44 | 1 | -5.089634 | 0.324010  | -2.061165 |
| 45 | 1 | -4.208988 | 1.845070  | -2.132135 |
| 46 | 8 | -5.225868 | -2.770576 | 1.035749  |
| 47 | 1 | -5.033564 | -3.704210 | 0.858520  |
| 48 | 1 | -3.210638 | -2.297197 | 0.908962  |
| 49 | 1 | -1.995902 | -1.750668 | -1.113765 |

|    |   |           |           |           |
|----|---|-----------|-----------|-----------|
| 50 | 1 | -2.792175 | -1.512528 | -2.663070 |
| 51 | 1 | -4.537025 | 2.194365  | 0.037457  |
| 52 | 1 | -3.691590 | 2.082176  | 1.560566  |
| 53 | 1 | -2.393030 | 0.155938  | 0.754142  |
| 54 | 6 | -4.226314 | -0.450391 | 2.448944  |
| 55 | 1 | -4.864095 | -1.197660 | 2.927176  |
| 56 | 1 | -3.187892 | -0.663917 | 2.733518  |
| 57 | 1 | -4.497816 | 0.527316  | 2.860900  |
| 58 | 6 | -5.881073 | -0.101126 | 0.619987  |
| 59 | 1 | -6.083423 | 0.919199  | 0.960541  |
| 60 | 1 | -6.151772 | -0.162351 | -0.436728 |
| 61 | 1 | -6.555267 | -0.768187 | 1.160798  |
| 62 | 1 | -1.845118 | 3.216138  | 0.752910  |
| 63 | 1 | -1.789454 | 1.260728  | -2.712777 |
| 64 | 6 | -0.371837 | 3.108802  | -1.379663 |
| 65 | 1 | -0.644554 | 4.168012  | -1.335875 |
| 66 | 1 | 0.367522  | 2.942169  | -0.576625 |
| 67 | 1 | 0.092449  | 2.868357  | -2.337016 |
| 68 | 6 | 2.999658  | -0.987627 | -1.656537 |
| 69 | 1 | 2.220272  | -1.684377 | -1.992310 |
| 70 | 1 | 2.842995  | -0.049335 | -2.211402 |
| 71 | 6 | 5.488083  | -0.264117 | -0.079150 |
| 72 | 6 | 5.502757  | -0.601805 | -1.592210 |
| 73 | 1 | 5.417313  | 0.338619  | -2.157362 |
| 74 | 6 | 4.378990  | -1.540896 | -2.039903 |
| 75 | 1 | 4.524419  | -2.540568 | -1.612059 |
| 76 | 1 | 4.421709  | -1.675550 | -3.127721 |
| 77 | 6 | 5.991783  | -1.466086 | 0.748914  |

|    |   |          |           |           |
|----|---|----------|-----------|-----------|
| 78 | 1 | 7.047654 | -1.651657 | 0.519928  |
| 79 | 1 | 5.925933 | -1.271999 | 1.825470  |
| 80 | 1 | 5.450678 | -2.392274 | 0.543281  |
| 81 | 6 | 6.490515 | 0.893775  | 0.136024  |
| 82 | 1 | 6.668151 | 1.103439  | 1.196079  |
| 83 | 1 | 7.459556 | 0.634427  | -0.305641 |
| 84 | 1 | 6.147489 | 1.820223  | -0.341492 |
| 85 | 1 | 6.478429 | -1.029001 | -1.857085 |

## B5

B3LYP/6-31G(d)//B3LYP/6-31G(d)

HF = -1325.2936448 hartrees (-831635.015048448 kcal/mol)

Imaginary Frequencies: none found

Zero-point correction = 0.793242 (Hartree/Particle)

mPW1PW91/6-31+G(d,p)//B3LYP/6-31G(d)

HF = -1325.1247813 hartrees (-831529.051513563 kcal/mol)

Coordinates (from last standard orientation):

| Center<br>Number | Atomic<br>Number | Coordinates (Angstroms) |           |           |
|------------------|------------------|-------------------------|-----------|-----------|
|                  |                  | X                       | Y         | Z         |
| 1                | 6                | 2.573994                | -1.630491 | 0.597848  |
| 2                | 6                | 2.820153                | -0.180470 | 1.088409  |
| 3                | 6                | 3.475928                | 0.582417  | -0.114755 |
| 4                | 6                | 4.783881                | -0.022840 | -0.734167 |

|    |   |           |           |           |
|----|---|-----------|-----------|-----------|
| 5  | 6 | 4.487902  | -1.508827 | -1.075076 |
| 6  | 6 | 3.857698  | -2.297297 | 0.076960  |
| 7  | 1 | 4.596090  | -2.430954 | 0.873596  |
| 8  | 6 | 1.497889  | 0.596604  | 1.578759  |
| 9  | 6 | 1.001753  | 1.779916  | 0.731494  |
| 10 | 6 | 2.137813  | 2.690462  | 0.193616  |
| 11 | 1 | 2.124433  | 3.609968  | 0.788397  |
| 12 | 6 | 3.545590  | 2.080034  | 0.198783  |
| 13 | 6 | 0.361885  | -0.309759 | 2.129584  |
| 14 | 1 | 0.840004  | -1.058703 | 2.769961  |
| 15 | 1 | -0.250782 | 0.288990  | 2.815522  |
| 16 | 6 | -0.601995 | -1.060358 | 1.179025  |
| 17 | 1 | -1.167664 | -1.740181 | 1.820269  |
| 18 | 1 | -0.050550 | -1.706649 | 0.496158  |
| 19 | 6 | -1.604873 | -0.170254 | 0.409120  |
| 20 | 1 | -1.808370 | 0.702317  | 1.034294  |
| 21 | 6 | -1.048124 | 0.388447  | -0.909126 |
| 22 | 6 | -1.953664 | 1.458925  | -1.500689 |
| 23 | 1 | -2.023823 | 2.305702  | -0.808295 |
| 24 | 6 | -0.538771 | -0.586567 | -1.962642 |
| 25 | 1 | -1.380330 | -1.071212 | -2.459063 |
| 26 | 1 | 0.021930  | -0.050989 | -2.736371 |
| 27 | 1 | 0.104863  | -1.361535 | -1.546958 |
| 28 | 6 | -3.064758 | -0.791726 | 0.210829  |
| 29 | 6 | -3.956661 | 0.351244  | -0.406663 |
| 30 | 1 | -3.860440 | 1.180653  | 0.314945  |
| 31 | 6 | -3.368683 | 0.888139  | -1.722891 |
| 32 | 1 | -3.988333 | 1.697703  | -2.116349 |

|    |   |           |           |           |
|----|---|-----------|-----------|-----------|
| 33 | 1 | -3.347872 | 0.117714  | -2.501681 |
| 34 | 1 | -1.541239 | 1.832410  | -2.448261 |
| 35 | 6 | -3.017517 | -2.105313 | -0.608134 |
| 36 | 1 | -3.845350 | -2.765201 | -0.344173 |
| 37 | 1 | -3.079404 | -1.951605 | -1.687990 |
| 38 | 1 | -2.099178 | -2.664920 | -0.401293 |
| 39 | 1 | 3.611551  | -3.307958 | -0.277564 |
| 40 | 8 | 0.352091  | 1.156918  | -0.563664 |
| 41 | 1 | 0.517480  | 1.765303  | -1.307712 |
| 42 | 6 | 3.695749  | -0.248223 | 2.367713  |
| 43 | 1 | 3.096047  | -0.626195 | 3.204852  |
| 44 | 1 | 4.550261  | -0.914626 | 2.269374  |
| 45 | 1 | 4.078496  | 0.734692  | 2.661646  |
| 46 | 8 | 5.705950  | -2.102289 | -1.508659 |
| 47 | 1 | 5.516438  | -3.004493 | -1.809325 |
| 48 | 1 | 3.760005  | -1.502277 | -1.908670 |
| 49 | 1 | 1.850663  | -1.619292 | -0.226304 |
| 50 | 1 | 2.143664  | -2.249646 | 1.392637  |
| 51 | 1 | 4.016023  | 2.249889  | 1.173013  |
| 52 | 1 | 4.157031  | 2.620122  | -0.528216 |
| 53 | 1 | 2.745100  | 0.477515  | -0.933234 |
| 54 | 6 | 5.078171  | 0.693431  | -2.075991 |
| 55 | 1 | 5.826713  | 0.123132  | -2.632071 |
| 56 | 1 | 4.179310  | 0.770206  | -2.702466 |
| 57 | 1 | 5.477404  | 1.702289  | -1.929009 |
| 58 | 6 | 6.048516  | 0.120303  | 0.140068  |
| 59 | 1 | 6.170179  | 1.153910  | 0.483535  |
| 60 | 1 | 6.053888  | -0.527758 | 1.017612  |

|    |   |           |           |           |
|----|---|-----------|-----------|-----------|
| 61 | 1 | 6.930245  | -0.140005 | -0.450089 |
| 62 | 1 | 1.879025  | 3.022624  | -0.824430 |
| 63 | 1 | 1.839405  | 1.143877  | 2.469255  |
| 64 | 6 | -0.035321 | 2.675109  | 1.414291  |
| 65 | 1 | 0.439793  | 3.137714  | 2.285355  |
| 66 | 1 | -0.342543 | 3.486313  | 0.745614  |
| 67 | 1 | -0.923126 | 2.155989  | 1.767128  |
| 68 | 6 | -3.637671 | -1.110118 | 1.622175  |
| 69 | 1 | -3.109130 | -1.959501 | 2.068976  |
| 70 | 1 | -3.462277 | -0.247708 | 2.282794  |
| 71 | 6 | -5.504984 | 0.093992  | -0.451566 |
| 72 | 6 | -5.958229 | -0.292244 | 0.978666  |
| 73 | 1 | -5.879905 | 0.598855  | 1.619251  |
| 74 | 6 | -5.141886 | -1.421096 | 1.611306  |
| 75 | 1 | -5.331546 | -2.366748 | 1.089405  |
| 76 | 1 | -5.473476 | -1.582922 | 2.643817  |
| 77 | 6 | -5.948065 | -0.974757 | -1.473673 |
| 78 | 1 | -7.042174 | -0.988029 | -1.535627 |
| 79 | 1 | -5.573771 | -0.755132 | -2.480335 |
| 80 | 1 | -5.629156 | -1.985662 | -1.211802 |
| 81 | 6 | -6.229952 | 1.410436  | -0.817333 |
| 82 | 1 | -6.108654 | 1.680158  | -1.871875 |
| 83 | 1 | -7.305509 | 1.301543  | -0.638946 |
| 84 | 1 | -5.878866 | 2.250772  | -0.205328 |
| 85 | 1 | -7.021516 | -0.562220 | 0.958990  |

-----

**TS (B5-[C]-D4)**

B3LYP/6-31G(d)//B3LYP/6-31G(d)

HF = -1325.2809765 hartrees (-831627.065563515 kcal/mol)

Imaginary Frequencies: 1 (-370.9670 1/cm)

Zero-point correction = 0.787814 (Hartree/Particle)

mPW1PW91/6-31+G(d,p)//B3LYP/6-31G(d)

HF = -1325.1147309 hartrees (-831522.744787059 kcal/mol)

Coordinates (from last standard orientation):

| -----  |        |                         |           |           |  |
|--------|--------|-------------------------|-----------|-----------|--|
| Center | Atomic | Coordinates (Angstroms) |           |           |  |
| Number | Number | X                       | Y         | Z         |  |
| -----  |        |                         |           |           |  |
| 1      | 6      | 2.628872                | -0.817782 | 1.422067  |  |
| 2      | 6      | 2.841014                | 0.617723  | 0.868700  |  |
| 3      | 6      | 3.597422                | 0.474176  | -0.497210 |  |
| 4      | 6      | 4.935743                | -0.344512 | -0.494938 |  |
| 5      | 6      | 4.652675                | -1.714294 | 0.179041  |  |
| 6      | 6      | 3.949083                | -1.593794 | 1.533091  |  |
| 7      | 1      | 4.629880                | -1.140241 | 2.260889  |  |
| 8      | 6      | 1.456588                | 1.339188  | 0.634989  |  |
| 9      | 6      | 1.234173                | 2.129146  | -0.528459 |  |
| 10     | 6      | 2.302002                | 2.326797  | -1.567264 |  |
| 11     | 1      | 2.303071                | 3.372024  | -1.896961 |  |
| 12     | 6      | 3.698757                | 1.833594  | -1.198620 |  |
| 13     | 6      | 0.320308                | 1.068373  | 1.634902  |  |
| 14     | 1      | 0.786127                | 0.957765  | 2.618619  |  |
| 15     | 1      | -0.321437               | 1.950477  | 1.716206  |  |

|    |   |           |           |           |
|----|---|-----------|-----------|-----------|
| 16 | 6 | -0.583694 | -0.176975 | 1.404744  |
| 17 | 1 | -1.119068 | -0.291803 | 2.351073  |
| 18 | 1 | 0.040567  | -1.064068 | 1.323370  |
| 19 | 6 | -1.605516 | -0.121698 | 0.234095  |
| 20 | 1 | -1.607960 | 0.902801  | -0.152134 |
| 21 | 6 | -1.150445 | -0.972377 | -0.989449 |
| 22 | 6 | -2.136564 | -0.778291 | -2.152757 |
| 23 | 1 | -2.034151 | 0.254837  | -2.512769 |
| 24 | 6 | -0.907026 | -2.468429 | -0.738484 |
| 25 | 1 | -1.834205 | -3.019165 | -0.575002 |
| 26 | 1 | -0.427772 | -2.906481 | -1.623767 |
| 27 | 1 | -0.249606 | -2.652959 | 0.115347  |
| 28 | 6 | -3.106691 | -0.352653 | 0.681824  |
| 29 | 6 | -4.004688 | -0.103731 | -0.588470 |
| 30 | 1 | -3.730723 | 0.916068  | -0.911112 |
| 31 | 6 | -3.596829 | -1.022419 | -1.754012 |
| 32 | 1 | -4.227394 | -0.830145 | -2.626718 |
| 33 | 1 | -3.750689 | -2.077974 | -1.500571 |
| 34 | 1 | -1.849928 | -1.432202 | -2.988573 |
| 35 | 6 | -3.290576 | -1.748082 | 1.332825  |
| 36 | 1 | -4.109807 | -1.750851 | 2.054312  |
| 37 | 1 | -3.508660 | -2.535093 | 0.608020  |
| 38 | 1 | -2.393841 | -2.052316 | 1.883582  |
| 39 | 1 | 3.727222  | -2.599636 | 1.913714  |
| 40 | 8 | 0.134134  | -0.381038 | -1.369226 |
| 41 | 1 | 0.453531  | -0.886769 | -2.135007 |
| 42 | 6 | 3.565604  | 1.474529  | 1.943671  |
| 43 | 1 | 2.898460  | 1.675593  | 2.790118  |

|    |   |           |           |           |
|----|---|-----------|-----------|-----------|
| 44 | 1 | 4.439216  | 0.965745  | 2.346700  |
| 45 | 1 | 3.903689  | 2.439479  | 1.550927  |
| 46 | 8 | 5.893459  | -2.397920 | 0.296543  |
| 47 | 1 | 5.718829  | -3.305337 | 0.590423  |
| 48 | 1 | 3.979729  | -2.271290 | -0.498763 |
| 49 | 1 | 1.967998  | -1.360465 | 0.737562  |
| 50 | 1 | 2.140146  | -0.794961 | 2.401636  |
| 51 | 1 | 4.203340  | 2.574647  | -0.568711 |
| 52 | 1 | 4.288084  | 1.764857  | -2.115671 |
| 53 | 1 | 2.909741  | -0.131254 | -1.109298 |
| 54 | 6 | 5.339112  | -0.639097 | -1.960732 |
| 55 | 1 | 6.113978  | -1.409657 | -1.969503 |
| 56 | 1 | 4.489546  | -1.007609 | -2.550246 |
| 57 | 1 | 5.748157  | 0.241800  | -2.465710 |
| 58 | 6 | 6.128631  | 0.372854  | 0.173998  |
| 59 | 1 | 6.252391  | 1.385262  | -0.225984 |
| 60 | 1 | 6.045411  | 0.447180  | 1.260114  |
| 61 | 1 | 7.047233  | -0.180319 | -0.033634 |
| 62 | 1 | 1.913451  | 1.750243  | -2.422740 |
| 63 | 1 | 1.724327  | 2.539134  | 0.770821  |
| 64 | 6 | -0.034661 | 2.881856  | -0.814974 |
| 65 | 1 | 0.190847  | 3.892707  | -1.166839 |
| 66 | 1 | -0.526271 | 2.347976  | -1.636365 |
| 67 | 1 | -0.734239 | 2.932810  | 0.016621  |
| 68 | 6 | -3.472322 | 0.739651  | 1.727587  |
| 69 | 1 | -2.925159 | 0.579075  | 2.665063  |
| 70 | 1 | -3.151214 | 1.720218  | 1.340920  |
| 71 | 6 | -5.553125 | -0.003098 | -0.348975 |

|    |   |           |           |           |
|----|---|-----------|-----------|-----------|
| 72 | 6 | -5.799317 | 1.043665  | 0.767017  |
| 73 | 1 | -5.556057 | 2.039675  | 0.366876  |
| 74 | 6 | -4.974266 | 0.815655  | 2.035462  |
| 75 | 1 | -5.305207 | -0.096631 | 2.546019  |
| 76 | 1 | -5.152570 | 1.632927  | 2.745100  |
| 77 | 6 | -6.234271 | -1.343682 | 0.002848  |
| 78 | 1 | -7.322023 | -1.208261 | 0.020583  |
| 79 | 1 | -6.018714 | -2.115118 | -0.745121 |
| 80 | 1 | -5.942895 | -1.736412 | 0.979168  |
| 81 | 6 | -6.233941 | 0.534706  | -1.629009 |
| 82 | 1 | -6.261786 | -0.207269 | -2.433708 |
| 83 | 1 | -7.272443 | 0.808735  | -1.410518 |
| 84 | 1 | -5.729204 | 1.431613  | -2.009571 |
| 85 | 1 | -6.869003 | 1.066302  | 1.011615  |

-----

#### D4

B3LYP/6-31G(d)//B3LYP/6-31G(d)

HF = -1325.3103885 hartrees (-831645.521887635 kcal/mol)

Imaginary Frequencies: none found

Zero-point correction = 0.792922 (Hartree/Particle)

mPW1PW91/6-31+G(d,p)//B3LYP/6-31G(d)

HF = -1325.1424285 hartrees (-831540.125308035 kcal/mol)

Coordinates (from last standard orientation):

-----

| Center | Atomic | Coordinates (Angstroms) |           |           |
|--------|--------|-------------------------|-----------|-----------|
| Number | Number | X                       | Y         | Z         |
| -----  |        |                         |           |           |
| 1      | 6      | 2.534710                | -1.146382 | 1.241613  |
| 2      | 6      | 2.652369                | 0.344169  | 0.832313  |
| 3      | 6      | 3.407585                | 0.449893  | -0.551019 |
| 4      | 6      | 4.746461                | -0.370375 | -0.705844 |
| 5      | 6      | 4.480144                | -1.823441 | -0.230552 |
| 6      | 6      | 3.868693                | -1.900872 | 1.169662  |
| 7      | 1      | 4.588898                | -1.527255 | 1.904735  |
| 8      | 6      | 1.217628                | 1.019271  | 0.713920  |
| 9      | 6      | 1.323033                | 2.490907  | 0.233348  |
| 10     | 6      | 2.166055                | 2.618687  | -1.053975 |
| 11     | 1      | 2.311671                | 3.683893  | -1.265201 |
| 12     | 6      | 3.524759                | 1.914039  | -1.005046 |
| 13     | 6      | 0.326026                | 0.831151  | 1.969457  |
| 14     | 1      | 0.966872                | 0.570365  | 2.812800  |
| 15     | 1      | -0.112581               | 1.799218  | 2.222511  |
| 16     | 6      | -0.819394               | -0.200492 | 1.907017  |
| 17     | 1      | -1.425108               | -0.050408 | 2.804000  |
| 18     | 1      | -0.424722               | -1.218579 | 1.976422  |
| 19     | 6      | -1.676482               | -0.009788 | 0.646295  |
| 20     | 1      | -1.771536               | 1.074526  | 0.503489  |
| 21     | 6      | -0.904123               | -0.498478 | -0.584300 |
| 22     | 6      | -1.563397               | -0.026226 | -1.874053 |
| 23     | 1      | -1.529010               | 1.067675  | -1.916924 |
| 24     | 6      | -0.491470               | -1.963725 | -0.672515 |
| 25     | 1      | -1.339366               | -2.560267 | -1.011504 |

|    |   |           |           |           |
|----|---|-----------|-----------|-----------|
| 26 | 1 | 0.295879  | -2.092247 | -1.425700 |
| 27 | 1 | -0.144061 | -2.382926 | 0.271479  |
| 28 | 6 | -3.171448 | -0.515014 | 0.675225  |
| 29 | 6 | -3.814985 | 0.009720  | -0.664300 |
| 30 | 1 | -3.644448 | 1.098994  | -0.629086 |
| 31 | 6 | -3.039644 | -0.483850 | -1.901970 |
| 32 | 1 | -3.485674 | -0.079282 | -2.814187 |
| 33 | 1 | -3.095690 | -1.574237 | -1.999584 |
| 34 | 1 | -1.025441 | -0.409668 | -2.750260 |
| 35 | 6 | -3.252439 | -2.046261 | 0.896129  |
| 36 | 1 | -4.194422 | -2.329292 | 1.368210  |
| 37 | 1 | -3.182638 | -2.628332 | -0.025506 |
| 38 | 1 | -2.457286 | -2.387370 | 1.568398  |
| 39 | 1 | 3.691123  | -2.953288 | 1.429063  |
| 40 | 8 | 0.459667  | 0.310093  | -0.491043 |
| 41 | 1 | 1.123576  | -0.058659 | -1.105444 |
| 42 | 6 | 3.409564  | 1.104674  | 1.959920  |
| 43 | 1 | 2.777224  | 1.283576  | 2.833052  |
| 44 | 1 | 4.254198  | 0.512650  | 2.309431  |
| 45 | 1 | 3.803460  | 2.069670  | 1.639796  |
| 46 | 8 | 5.710599  | -2.530396 | -0.300933 |
| 47 | 1 | 5.540854  | -3.465368 | -0.108017 |
| 48 | 1 | 3.754581  | -2.266530 | -0.940133 |
| 49 | 1 | 1.831406  | -1.655625 | 0.573858  |
| 50 | 1 | 2.120384  | -1.232103 | 2.252462  |
| 51 | 1 | 4.201022  | 2.461625  | -0.341123 |
| 52 | 1 | 3.979829  | 1.958748  | -1.998332 |
| 53 | 1 | 2.761512  | -0.051611 | -1.303746 |

|    |   |           |           |           |
|----|---|-----------|-----------|-----------|
| 54 | 6 | 5.112608  | -0.441706 | -2.208673 |
| 55 | 1 | 5.914030  | -1.170826 | -2.349338 |
| 56 | 1 | 4.258338  | -0.760154 | -2.820996 |
| 57 | 1 | 5.466812  | 0.519038  | -2.593782 |
| 58 | 6 | 5.960536  | 0.237936  | 0.030342  |
| 59 | 1 | 6.132124  | 1.272294  | -0.283829 |
| 60 | 1 | 5.869174  | 0.227966  | 1.118073  |
| 61 | 1 | 6.853984  | -0.337820 | -0.220986 |
| 62 | 1 | 1.577578  | 2.230064  | -1.897807 |
| 63 | 1 | 1.859635  | 2.995285  | 1.048405  |
| 64 | 6 | -0.005909 | 3.237880  | 0.037310  |
| 65 | 1 | 0.210122  | 4.277308  | -0.229196 |
| 66 | 1 | -0.590805 | 2.810715  | -0.783849 |
| 67 | 1 | -0.634485 | 3.265419  | 0.931551  |
| 68 | 6 | -3.893274 | 0.189778  | 1.856834  |
| 69 | 1 | -3.528916 | -0.205065 | 2.813063  |
| 70 | 1 | -3.642271 | 1.261162  | 1.841941  |
| 71 | 6 | -5.374439 | -0.106266 | -0.784535 |
| 72 | 6 | -5.994670 | 0.550656  | 0.475940  |
| 73 | 1 | -5.830201 | 1.636780  | 0.415618  |
| 74 | 6 | -5.420954 | 0.044113  | 1.801837  |
| 75 | 1 | -5.711517 | -1.000305 | 1.968214  |
| 76 | 1 | -5.860242 | 0.608264  | 2.633090  |
| 77 | 6 | -5.896226 | -1.548412 | -0.962922 |
| 78 | 1 | -6.973054 | -1.525137 | -1.165469 |
| 79 | 1 | -5.421952 | -2.049325 | -1.814890 |
| 80 | 1 | -5.748677 | -2.176674 | -0.081931 |
| 81 | 6 | -5.855698 | 0.712766  | -2.004751 |

|    |   |           |          |           |
|----|---|-----------|----------|-----------|
| 82 | 1 | -5.603634 | 0.236626 | -2.958418 |
| 83 | 1 | -6.946629 | 0.811941 | -1.977454 |
| 84 | 1 | -5.433757 | 1.725542 | -2.005321 |
| 85 | 1 | -7.082020 | 0.405311 | 0.457928  |

-----

## 8. Crystallographic Data

### Alkene **13**

CCDC 1529115 contains the supplementary crystallographic data for this paper. These data can be obtained free of charge from The Cambridge Crystallographic Data Centre via [www.ccdc.cam.ac.uk/structures](http://www.ccdc.cam.ac.uk/structures)

### Cupacinoxepin **4**

CCDC 1529116 contains the supplementary crystallographic data for this paper. These data can be obtained free of charge from The Cambridge Crystallographic Data Centre via [www.ccdc.cam.ac.uk/structures](http://www.ccdc.cam.ac.uk/structures)

### Oxane **22**

CCDC 1529117 contains the supplementary crystallographic data for this paper. These data can be obtained free of charge from The Cambridge Crystallographic Data Centre via [www.ccdc.cam.ac.uk/structures](http://www.ccdc.cam.ac.uk/structures)

### Oxepane **10**

CCDC 1529118 contains the supplementary crystallographic data for this paper. These data can be obtained free of charge from The Cambridge Crystallographic Data Centre via [www.ccdc.cam.ac.uk/structures](http://www.ccdc.cam.ac.uk/structures)

## 9. References

1. J. H. George, M. McArdle, J. E. Baldwin and R. M. Adlington, *Tetrahedron*, 2010, **66**, 6321-6330.
2. D. J. Clausen, S. Wan and P. E. Floreancig, *Angew. Chem. Int. Ed.*, 2011, **50**, 5178-5181.
3. V. Domingo, L. Lorenzo, J. F. Quilez del Moral and A. F. Barrero, *Org. Biomol. Chem.*, 2013, **11**, 559-562.
4. T. R. Hoye, C. S. Jeffrey and F. Shao, *Nat. Protoc.*, 2007, **2**, 2451-2458.
5. J. A. Soderquist and A. Negron, *Org. Synth.*, 1992, **70**, 169.
6. R. K. Boeckman, P. Shao and J. J. Mullins, *Org. Synth.*, 2000, **77**, 141.
7. M. S. Gachet, O. Kunert, M. Kaiser, R. Brun, M. Zehl, W. Keller, R. A. Muñoz, R. Bauer and W. Schuehly, *J. Nat. Prod.*, 2011, **74**, 559-566.
8. H. Ageta, K. Shiojima and K. Masuda, *Chem. Pharm. Bull.*, 1982, **30**, 2272-2274.
9. D. Ueda, T. Hoshino and T. Sato, *J. Am. Chem. Soc.*, 2013, **135**, 18335-18338.
10. Y. Arai, M. Hirohara, H. Ageta and H. Y. Hsü, *Tetrahedron Lett.*, 1992, **33**, 1325-1328.
11. M. Kinoshita, D. Nakamura, N. Fujiwara and H. Akita, *J. Mol. Catal. B: Enzym.*, 2003, **22**, 161-172.
12. T. Sato, H. Hoshino, S. Yoshida, M. Nakajima and T. Hoshino, *J. Am. Chem. Soc.*, 2011, **133**, 17540-17543.
13. M. Nishizawa, H. Takao, N. Kanoh, K. Asoh, S. Hatakeyama and H. Yamada, *Tetrahedron Lett.*, 1994, **35**, 5693-5696.
14. D. H. R. Barton and K. H. Overton, *J. Chem. Soc. (Resumed)*, 1955, 2639-2652.
15. S. Berger and D. Sicker, *Classics in Spectroscopy: Isolation and Structure Elucidation of Natural Products*, Wiley-VCH, Weinheim, 2009.
16. K. K. W. Kuan, H. P. Pepper, W. M. Bloch and J. H. George, *Org. Lett.*, 2012, **14**, 4710-4713.
17. J.-P. Zahra, F. Chauvet, I. Coste-Manière, P. Martres, P. Perfetti and B. Waegell, *Bull. Soc. Chim. Fr.*, 1997, **134**, 1001-1024.
18. M. Matsushita, Y. Nagaoka, H. Hioki, Y. Fukuyama and M. Kodama, *Chem. Lett.*, 1996, **25**, 1039-1040.
19. J. Deng, S. Zhou, W. Zhang, J. Li, R. Li and A. Li, *J. Am. Chem. Soc.*, 2014, **136**, 8185-8188.
20. S. Nakamura, K. Ishihara and H. Yamamoto, *J. Am. Chem. Soc.*, 2000, **122**, 8131-8140.
21. C. A. Mullen and M. R. Gagné, *J. Am. Chem. Soc.*, 2007, **129**, 11880-11881.
22. R. L. Snowden, J. C. Eichenberger, S. M. Linder, P. Sonnay, C. Vial and K. H. Schulte-Elte, *J. Org. Chem.*, 1992, **57**, 955-960.
23. K. B. Sharpless, *J. Am. Chem. Soc.*, 1970, **92**, 6999-7001.
24. A. F. Barrero, J. Altarejos, E. J. Alvarez-Manzaneda, J. M. Ramos and S. Salido, *J. Org. Chem.*, 1996, **61**, 2215-2218.
25. M. Uyanik, H. Ishibashi, K. Ishihara and H. Yamamoto, *Org. Lett.*, 2005, **7**, 1601-1604.
26. P. F. Vlad, N. D. Ungur and V. B. Perutskii, *Chemistry of Heterocyclic Compounds*, 1990, **26**, 746-750.
27. A. S. Gopalan, R. Prieto, B. Mueller and D. Peters, *Tetrahedron Lett.*, 1992, **33**, 1679-1682.
28. S. Murata and T. Suzuki, *Tetrahedron Lett.*, 1990, **31**, 6535-6538.
29. T. R. Hoye, A. J. Caruso, J. F. Dellaria and M. J. Kurth, *J. Am. Chem. Soc.*, 1982, **104**, 6704-6709.
30. H.-M. Shieh and G. D. Prestwich, *Tetrahedron Lett.*, 1982, **23**, 4643-4646.
31. J. D. White, T. Nishiguchi and R. W. Skeeane, *J. Am. Chem. Soc.*, 1982, **104**, 3923-3928.
32. T. Abe and T. Hoshino, *Org. Biomol. Chem.*, 2005, **3**, 3127-3139.

33. H.-C. Carmen, A.-C. Miriam, M.-D. Manuel and R.-G. Ignacio, *Curr. Org. Chem.*, 2014, **18**, 525-546.
34. M. Göhl and K. Seifert, *Eur. J. Org. Chem.*, 2014, 6975-6982.
35. Gaussian 09, Revision B.01, M. J. Frisch, G. W. Trucks, H. B. Schlegel, G. E. Scuseria, M. A. Robb, J. R. Cheeseman, G. Scalmani, V. Barone, B. Mennucci, G. A. Petersson, H. Nakatsuji, M. Caricato, X. Li, H. P. Hratchian, A. F. Izmaylov, J. Bloino, G. Zheng, J. L. Sonnenberg, M. Hada, M. Ehara, K. Toyota, R. Fukuda, J. Hasegawa, M. Ishida, T. Nakajima, Y. Honda, O. Kitao, H. Nakai, T. Vreven, J. A. Montgomery, Jr., J. E. Peralta, F. Ogliaro, M. Bearpark, J. J. Heyd, E. Brothers, K. N. Kudin, V. N. Staroverov, T. Keith, R. Kobayashi, J. Normand, K. Raghavachari, A. Rendell, J. C. Burant, S. S. Iyengar, J. Tomasi, M. Cossi, N. Rega, J. M. Millam, M. Klene, J. E. Knox, J. B. Cross, V. Bakken, C. Adamo, J. Jaramillo, R. Gomperts, R. E. Stratmann, O. Yazyev, A. J. Austin, R. Cammi, C. Pomelli, J. W. Ochterski, R. L. Martin, K. Morokuma, V. G. Zakrzewski, G. A. Voth, P. Salvador, J. J. Dannenberg, S. Dapprich, A. D. Daniels, O. Farkas, J. B. Foresman, J. V. Ortiz, J. Cioslowski, and D. J. Fox, Gaussian, Inc., Wallingford CT, 2010.
36. (a) A. D. Becke, *J. Chem. Phys.* 1993, **98**, 1372-1377. (b) A. D. Becke, *J. Chem. Phys.* 1993, **98**, 5648-5652. (c) C. Lee, W. Yang and R. G. Parr, *Phys. Rev. B* 1988, **37**, 785-789. (d) P. J. Stephens, F. J. Devlin, C. F. Chabalowski and M. J. Frisch, *J. Phys. Chem.* 1994, **98**, 11623-11627. (e) J. Tirado-Rives and W. L. Jorgensen, *J. Chem. Theory Comput.* 2008, **4**, 297-306.
37. (a) C. Gonzalez and H. B. Schlegel, *J. Phys. Chem.* 1990, **94**, 5523-5527. (b) K. Fukui, *Acc. Chem. Res.* 1981, **14**, 363-368.
38. S. P. T. Matsuda, W. K. Wilson and Q. Xiong, *Org. Biomol. Chem.* 2006, **4**, 530-543.
39. D. J. Tantillo, *Nat. Prod. Rep.* 2011, **28**, 1035-1053. This is part 8 of our series on theoretical studies of diterpene-forming carbocation rearrangements. For part 6 and 7, see refs. M. M. Vaughan, F. X. Webster, D. Kiemle, Y. J. Hong, D. J. Tantillo, Q. Wang, R. M. Coates, A. T. Wray, W. Askew, C. O'Donnell, J. G. Tokuhisa, W. Boland and D. Tholl, *Plant Cell*, 2013, **25**, 1108-1125Y and Y. J. Hong and D. J. Tantillo, *Nature Chem.* 2014, **6**, 104-111.
40. N. Muller and A. Falk, *Ball & Stick 4.0a12*, molecular graphics software for MacOS, Johannes Kepler University Linz, 2004.
